# Supplementary material for: Chiral synthetic unprecedented spiro[indoline-2,3′-thiophen]-3-ones via an organocatalytic asymmetric sulfa-Michael/aldol cascade reaction
Source: Royal Society of Chemistry journal article supplement (doi:10.1039/d4qo01551g), 2024-01-01
Supplement: d4qo01551g1.pdf [file d4qo01551g1.pdf]

## Supporting Information

# Chiral synthetic unprecedented spiro[indoline-2,3'-thiophen]-3-ones via organocatalytic asymmetric sulfa-Michael/aldol cascade reaction

Mao Zhang,<sup>†</sup> Xing-Hai Fei,<sup>†</sup> Gui-Ping Yang,<sup>†</sup> Cheng Lin, Wen-Jie Li, Ming-Liang Rao, Meng Zhou, Chong Zhao,\* Bin He\* and Yong-Long Zhao\*

*School of Pharmacy, and Engineering Research Center for the Development and Application of Ethnic Medicine and TCM (Ministry of Education), Guizhou Medical University, Guiyang 550004, P.R. China.*

\*Email: zhaoyl05@126.com; zhaoyonglong@gmc.edu.cn.

<sup>†</sup>These authors contributed equally to this work.

### Table of Contents

|                                                                                                                                                                      |      |
|----------------------------------------------------------------------------------------------------------------------------------------------------------------------|------|
| 1. General information .....                                                                                                                                         | S2   |
| 2. Preparation of substrates .....                                                                                                                                   | S3   |
| 3. Reported examples of asymmetric synthesis of C2-spirooxindoles .....                                                                                              | S4   |
| 4. General procedure for the organocatalytic asymmetric sulfa-Michael/aldol cascade reaction of 2-ylideneoxindoles with 1,4-dithiane-2,5-diol .....                  | S6   |
| 5. General procedure for sulfa-Michael addition of 2-ylideneoxindoles with thiol ....                                                                                | S6   |
| 6. The large-scale synthesis of the product <b>3a</b> .....                                                                                                          | S7   |
| 7. Procedure for the synthesis of compounds <b>5</b> to <b>9</b> and <b>1ac</b> .....                                                                                | S7   |
| 8. Cocrystallization phenomenon of <i>rac</i> - <b>3k</b> and its application in further improving the optical purity of spiro[indoline-2,3'-thiophene]-3-ones ..... | S9   |
| 9. The effects of <i>Z/E</i> configurations of 2-ylideneoxindole <b>1</b> for the asymmetric sulfa-Michael/aldol cascade reaction .....                              | S11  |
| 10. Characterization of products .....                                                                                                                               | S17  |
| 11. X-ray crystallographic data of products <i>rac</i> - <b>3k</b> , <b>4f</b> , <b>7</b> and <b>9</b> .....                                                         | S49  |
| 12. NMR spectra .....                                                                                                                                                | S53  |
| 13. HPLC chromatograms .....                                                                                                                                         | S99  |
| 14. DFT calculations .....                                                                                                                                           | S149 |
| 15. References .....                                                                                                                                                 | S188 |

## 1. General information

Chemicals and solvents were either purchased from commercial suppliers (such as Energy-chemical, Alfa, Aladdin) or purified by standard procedures as specified in Purification of Laboratory Chemicals, 4th Ed (Armarego, W. L. F.; Perrin, D. D. Butterworth Heinemann: 1997). Petroleum ether (PE) and ethyl acetate (EtOAc) were distilled. All experiments were monitored by analytical thin-layer chromatography (TLC). TLC was performed on silica gel plates with F-254 indicator and visualized by irradiation with UV light. Flash chromatography was performed using silica gel (200-300 mesh). Melting points were recorded on an electrothermal digital melting point apparatus.  $^1\text{H}$  NMR,  $^{13}\text{C}$  NMR spectra were recorded on a JNM-ECS400 (400 M) or 600 MHz Bruker Avance III HD spectrometer (400 or 600 MHz  $^1\text{H}$ , 100 or 150 MHz  $^{13}\text{C}$ ). The spectra were recorded in  $\text{DMSO-}d_6$  or  $\text{CDCl}_3$  as the solvents at room temperature,  $^1\text{H}$  and  $^{13}\text{C}$  NMR chemical shifts are reported in ppm relative to the residual solvent peak as an internal standard:  $\text{DMSO}$  ( $^1\text{H}$  NMR:  $\delta$  2.50,  $^{13}\text{C}$  NMR:  $\delta$  39.52);  $\text{CDCl}_3$  ( $^1\text{H}$  NMR:  $\delta$  7.26,  $^{13}\text{C}$  NMR:  $\delta$  77.00). Data for  $^1\text{H}$  NMR are reported as follows: chemical shift ( $\delta$  ppm), multiplicity (s = singlet, d = doublet, t = triplet, q = quartet, dd = doublet of doublets, td = triplet of doublets, ddd = doublet of doublet of doublets, m = multiplet or combinations thereof), integration, coupling constant (Hz) and assignment. Data for  $^{13}\text{C}$  NMR are reported as chemical shift. High resolution mass spectrometry (HRMS) were performed on a Thermofisher (Vanquish (UPLC)-Q-Exactive Plus) mass instrument (ESI) and methanol was used to dissolve the sample. Enantiomeric excess values were determined by HPLC using a Daicel Chirapak (IA-H, IB-H and IC-H) column on Essentia LC-16 series and eluting with *i*-PrOH and *n*-hexane. Optical rotation was measured on the IP-digi 300 polarimeter with  $[\alpha]_D^{20}$  values reported in degrees at 20 °C; concentration (*c*) is in g/100 mL. 1,4-dithiane-2,5-diol or thiols were purchased from Energy Chemical (China). Chiral thiourea and squaramide catalysts were synthesized utilizing literature procedure.<sup>1</sup>

## 2. Preparation of substrates

2-ylideneoxindoles **1** were prepared by following the publish procedures.<sup>2</sup>

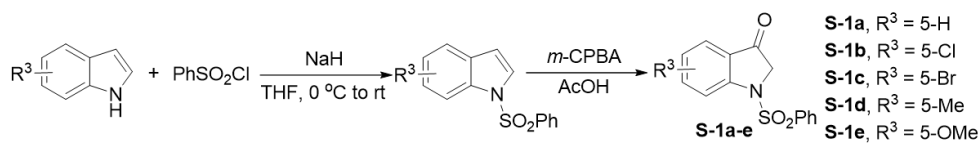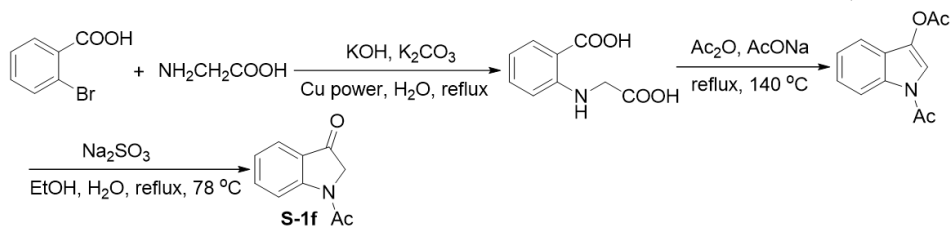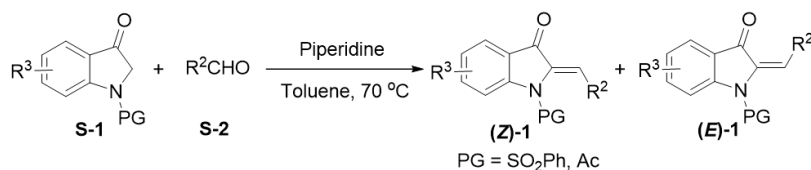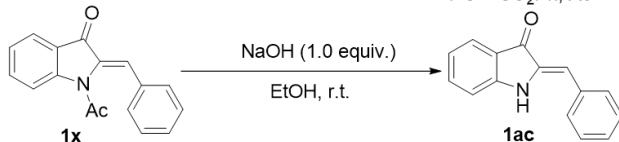

### List of (Z)-2-ylideneoxindoles 1

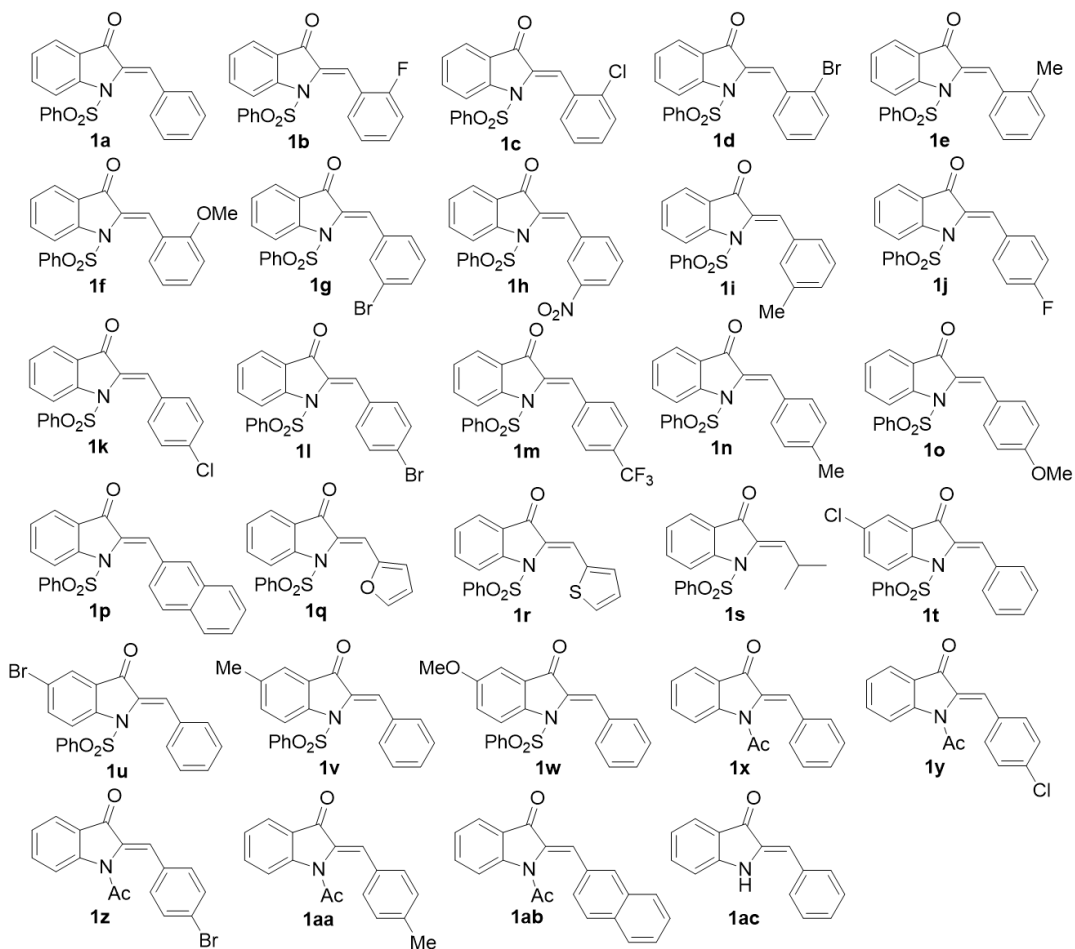

### 3. Reported examples of asymmetric synthesis of C2-spirooxindoles

(a) Glorius' work, 2014<sup>3</sup>

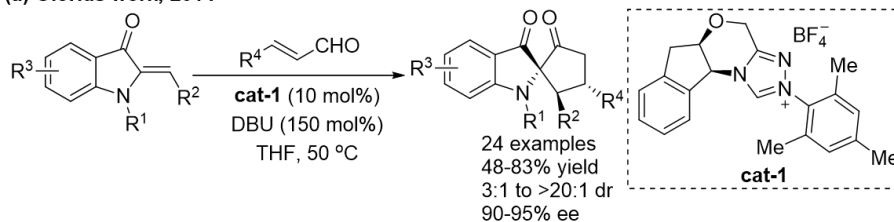

(b) Xu and Hu's work, 2016<sup>4</sup>

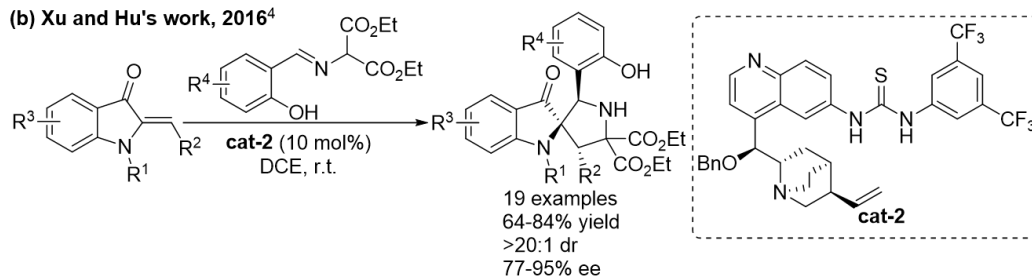

(c) Han and Peng's work, 2016<sup>5</sup>

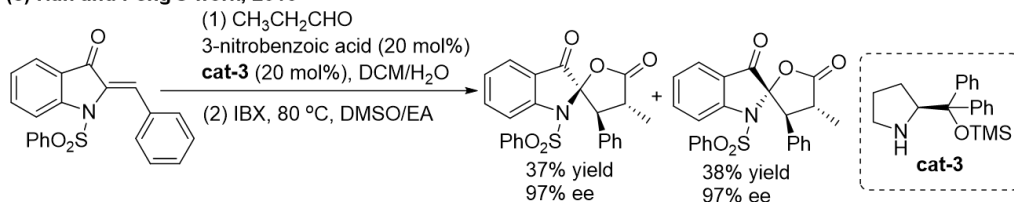

(d) Sasai and Takizawa's work, 2021<sup>6</sup>

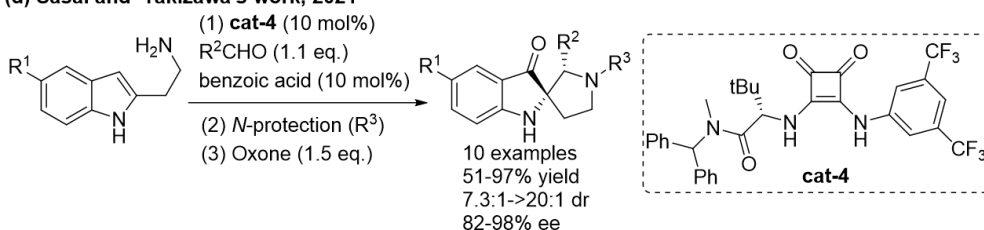

(e) Pirovano's work, 2022<sup>7</sup>

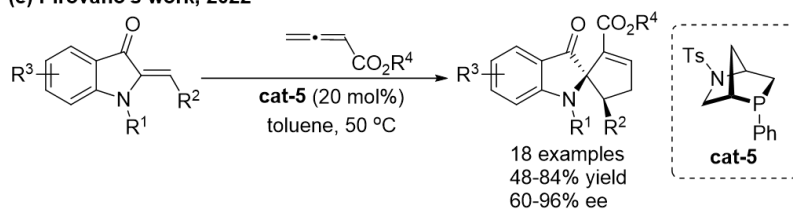

(f) Chen's work, 2023<sup>8</sup>

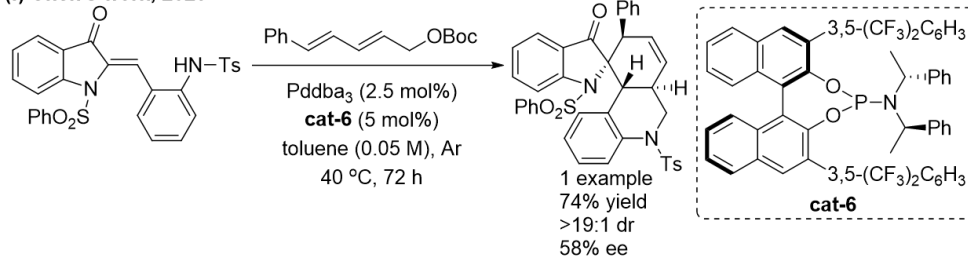

(g) Wang and Ren's work, 2023<sup>9</sup>

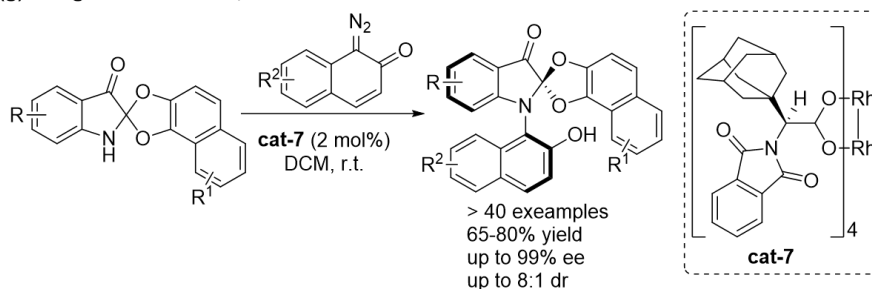

(h) You's work, 2013<sup>10</sup>

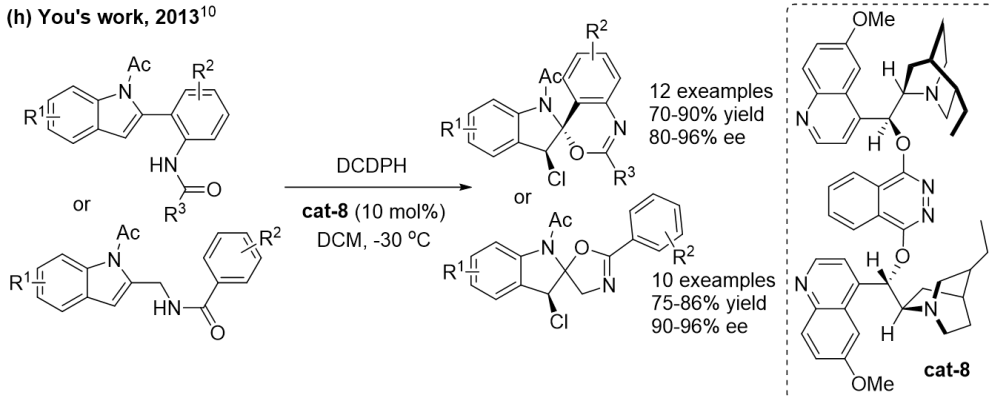

(i) Wang's work, 2017<sup>11</sup>

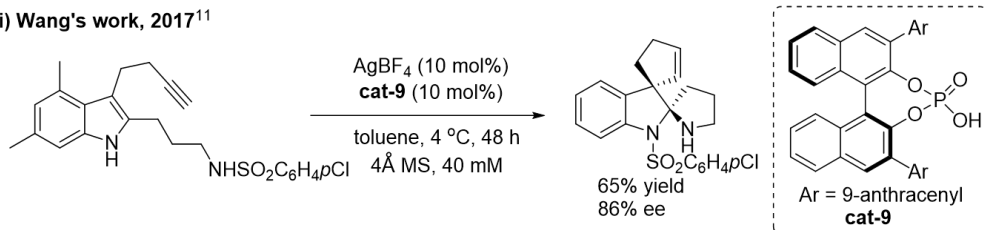

(j) Ji's work, 2019<sup>12</sup>

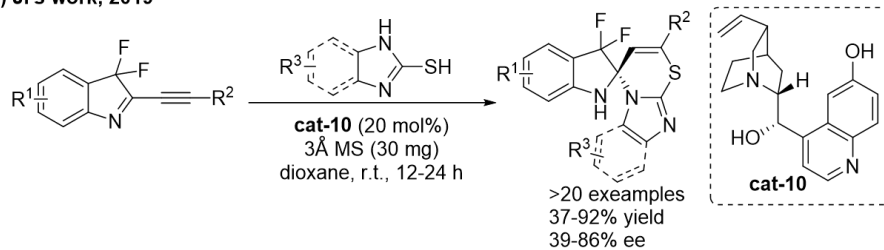

(k) Kapur's work, 2023<sup>13</sup>

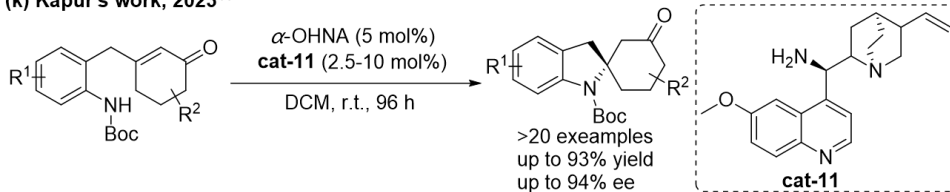

#### 4. General procedure for the organocatalytic asymmetric *sulfa*-Michael/aldol cascade reaction of 2-ylideneoxindoles with 1,4-dithiane-2,5-diol

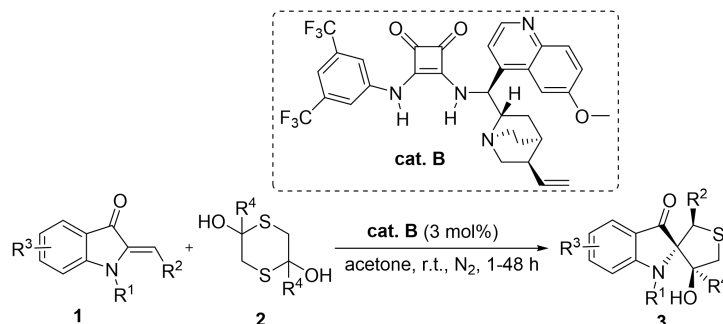

(*Z*)-2-ylideneoxindoles **1** (0.10 mmol, 1.0 equiv.), 1,4-dithiane-2,5-diol **2** (0.06 mmol, 0.60 equiv.) and catalyst **B** (1.89 mg, 0.003 mmol, 3 mol%) were added to a 5.0 mL Schlenk tube equipped with a stir bar. Then sealed with a rubber septum and vacuum purged five times with high pure nitrogen to remove air. Fresh distilled degassed acetone (1.0 mL) was added consecutively under a positive flow of high pure nitrogen. The reaction mixture was stirred at room temperature. After the required period of time (as judged by TLC analysis). The resulting solution was concentrated and directly purified by flash column chromatography (eluted with petroleum ether/ethyl acetate = 8/1 to 5/1, v/v) to afford the desired spiro[indoline-2,3'-thiophen]-3-ones **3**.

#### 5. General procedure for *sulfa*-Michael addition of 2-ylideneoxindoles with thiol

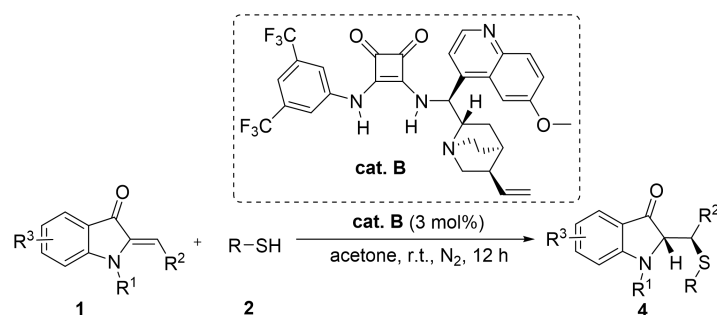

(*Z*)-2-ylideneoxindoles **1** (0.10 mmol, 1.0 equiv.), thiol **2** (0.12 mmol, 1.2 equiv.) and catalyst **B** (1.89 mg, 0.003 mmol, 3 mol%) were added to a 5.0 mL Schlenk tube equipped with a stir bar. Then sealed with a rubber septum and vacuum purged five times with high pure nitrogen to remove air. Fresh distilled degassed acetone (1.0 mL) was added consecutively under a positive flow of high pure nitrogen. The reaction mixture was stirred at room temperature for 12 h. The resulting solution was

concentrated and directly purified by flash column chromatography (eluted with petroleum ether/ethyl acetate = 10/1, v/v) to afford the desired products **4**.

## 6. The large-scale synthesis of the product **3a**

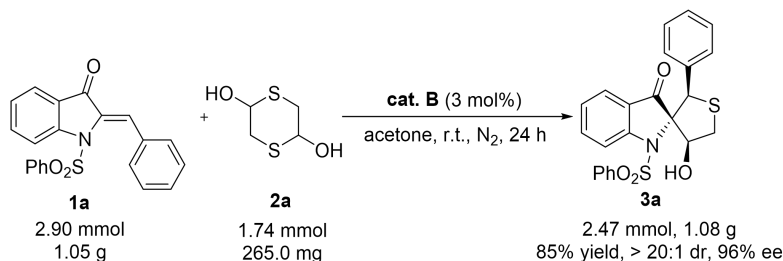

(*Z*)-2-benzylidene-1-(phenylsulfonyl)indolin-3-one **1a** (2.90 mmol, 1.05 g), 1,4-dithiane-2,5-diol **2a** (1.74 mmol, 265.0 mg) and catalyst **B** (55.0 mg, 0.087 mmol) were added to a dry 50 mL round bottom flask with a stir bar. Then sealed with a rubber septum and vacuum purged five times with high pure nitrogen to remove air. Fresh distilled degassed acetone (20.0 mL) was added consecutively under a positive flow of high pure nitrogen. The reaction mixture was stirred at room temperature for 24 hours (as judged by TLC analysis). The resulting solution was concentrated and directly purified by flash column chromatography (eluted with petroleum ether/ethyl acetate = 8/1, v/v) to afford the white solid **3a** (85% yield, >20:1 dr and 96% ee).

## 7. Procedure for the synthesis of compounds **5** to **9** and **1ac**

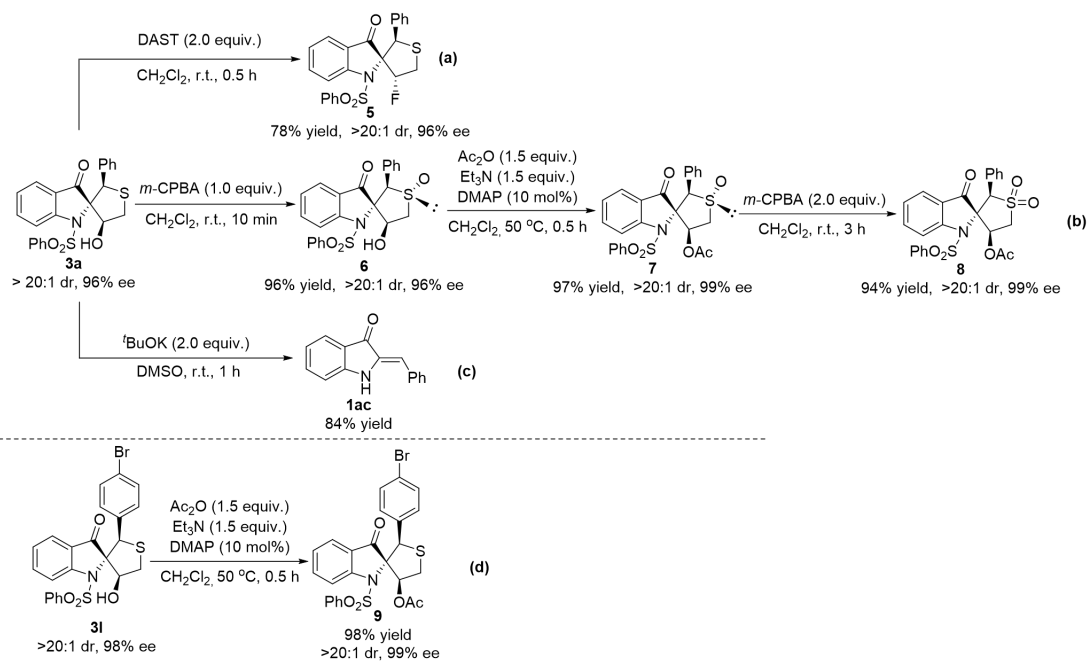

*Synthesis of 5:* According to the literature,<sup>16</sup> in a test tube, **3a** (0.10 mmol, 43.7 mg, >20:1 dr and 96% ee) was dissolved in anhydrous CH<sub>2</sub>Cl<sub>2</sub> (1.0 mL), DAST (2.0 equiv., 0.2 mmol, 32.2 mg) was added under N<sub>2</sub> atmosphere. The resulting solution was stirred at room temperature for 0.5 h. After the reaction was completed, which was determined by TLC, the mixture was directly purified by flash chromatography on silica gel was purified by silica gel flash chromatography (petroleum ether/ethyl acetate = 5/1, v/v) to yield the product **5** as a white solid (78% yield, 34.2 mg, >20:1 dr and 96% ee).

*Synthesis of 6:* To a stirred solution of **3a** (0.10 mmol, 43.7 mg) in dry CH<sub>2</sub>Cl<sub>2</sub> (1.0 mL) at room temperature, then slowly add *m*-CPBA (17.2 mg, 0.1 mmol). The reaction mixture was intense stirred for 10 min (as judged by TLC analysis). The resulting solution was concentrated and directly purified by flash column chromatography (eluted with petroleum ether/ethyl acetate = 1/1, v/v) to afford the white solid **6** (96% yield, >20:1 dr and 96% ee).

*Synthesis of 7:* To a solution of **6** (0.10 mmol, 45.3 mg, >20:1 dr and 96% ee), DMAP (0.01 mmol, 1.2 mg), and Et<sub>3</sub>N (0.15 mmol, 21.0 μL) in CH<sub>2</sub>Cl<sub>2</sub> (1.0 mL) under stirring at 50 °C temperature, then slowly add Ac<sub>2</sub>O (0.15 mmol, 14.0 μL) and keep the same temperature for 0.5 h (as judged by TLC analysis). The reaction mixture was then poured into saturated aqueous NaHCO<sub>3</sub> (5.0 mL), extracted with CH<sub>2</sub>Cl<sub>2</sub> (3 × 5 mL), dried over Na<sub>2</sub>SO<sub>4</sub> and evaporated under reduced pressure. The residue obtained was directly purified by flash chromatography (eluted with petroleum ether/ethyl acetate = 2/1, v/v) to afford the white solid **7** (97% yield, >20:1 dr and 99% ee).

*Synthesis of 8:* In a test tube, **7** (0.05 mmol, 25.0 mg, >20:1 dr and 99% ee) was dissolved in CH<sub>2</sub>Cl<sub>2</sub> (1.0 mL), then slowly add *m*-CPBA (17.2 mg, 0.10 mmol). The reaction mixture was intense stirred for 3 h (as judged by TLC analysis). The resulting solution was concentrated and directly purified by flash column chromatography (eluted with petroleum ether/ethyl acetate = 2/1, v/v) to afford the white solid **8** (94% yield, >20:1 dr and 99% ee).



*Synthesis of 9*: To a solution of **31** (0.06 mmol, 30.0 mg), DMAP (0.006 mmol, 0.73 mg), and Et<sub>3</sub>N (0.09 mmol, 12.5 μL) in DCM (1.0 mL) under stirring at 50 °C temperature, then slowly add Ac<sub>2</sub>O (0.09 mmol, 8.5 μL) and keep the same temperature for 0.5 h (as judged by TLC analysis). The reaction mixture was then poured into saturated aqueous NaHCO<sub>3</sub> (5.0 mL), extracted with CH<sub>2</sub>Cl<sub>2</sub> (3 × 5 mL), dried over Na<sub>2</sub>SO<sub>4</sub> and evaporated under reduced pressure. The residue obtained was directly purified by flash chromatography (eluted with petroleum ether/ethyl acetate = 15/1, v/v) to afford the white solid **9** (98% yield, >20:1 dr and 99% ee).

*Synthesis of 1ac*: (2*R*,2'*R*,4'*S*)-4'-hydroxy-2'-phenyl-1-(phenylsulfonyl)-4',5'-dihydro-2'*H*-piro[indoline-2,3'-thiophen]-3-one **3a** (0.10 mmol, 43.7 mg, >20:1 dr, 96% ee), and <sup>t</sup>BuOK (0.20 mmol, 22.4 mg) were added to a 10 mL Shlenk tube equipped with a stir bar. Then, fresh dried and degassed DMSO (1.0 mL) was added, the reaction mixture was stirred at room temperature for 0.5 hours (as judged by TLC analysis). After completion the reaction was quenched by addition of H<sub>2</sub>O (5.0 mL) and the aqueous layer was extracted with DCM (3 × 5 mL). The combined organic phases and washed with water (3 × 5 mL). Then organic extracts were dried over anhydrous Na<sub>2</sub>SO<sub>4</sub> and concentrated in vacuo. The crude mixture was purified by flash chromatography (eluted with petroleum ether/ ethyl acetate = 10/1, v/v) to afford a brown solid **1ac** (84% yield, 18.6 mg).

## **8. Cocrystallization phenomenon of *rac*-**3k** and its application in further improving the optical purity of spiro[indoline-2,3'-thiophene]-3-ones**

Some products **3** with poor enantioselectivity were selected as representatives for cocrystallization. The corresponding products **3** obtained under standard conditions was dissolved in 3 mL acetone, *n*-hexane (6-9 mL) is added to make the system into a transparent system, and the solvent system is crystallized at room temperature. After crystal precipitation, the solid and liquid phases are separated. After the solid is washed with *n*-hexane for several times, the washing liquid and liquid phase are enriched. Finally, the solid and liquid phases were analyzed by HPLC (**Table S1**).

**Table S1** Further improving the optical purity via cocrystallization.

| Compound  | Data obtained under standard conditions |        | Data from cocrystallization |        |              |        |
|-----------|-----------------------------------------|--------|-----------------------------|--------|--------------|--------|
|           |                                         |        | solid phase                 |        | liquid phase |        |
|           | M (mg)                                  | ee (%) | M (mg)                      | ee (%) | M (mg)       | ee (%) |
| <b>3i</b> | 42.6                                    | 82     | 4.1                         | 10     | 32.0         | 90     |
| <b>3k</b> | 41.0                                    | 91     | 12.6                        | 84     | 21.0         | 98     |
| <b>3l</b> | 49.0                                    | 90     | 12.3                        | 72     | 30.2         | 98     |
| <b>3o</b> | 41.7                                    | 86     | 14.0                        | 70     | 24.5         | 99     |
| <b>3w</b> | 40.5                                    | 82     | 15.4                        | 68     | 24.4         | 96     |

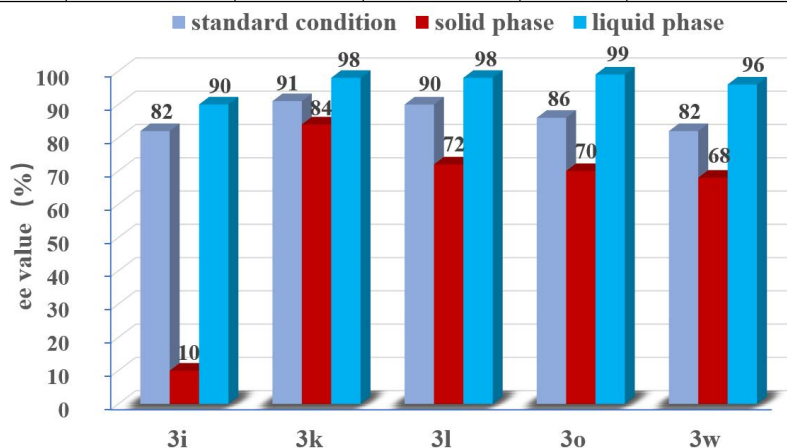

**Figure S1.** The ee values of each phase after evaporation crystallization.

The racemized **3k** cocrystal as shown in **Figure S2**, exhibited two hydrogen bonds between the hydroxyl group on the thiophene ring and the carbonyl group on the indole ring between the **3k** enantiomers. Additionally weak  $\pi\cdots\pi$  interactions might also occur between the *N*-benzenesulfonyl substitutes of indole ring. These interactions led to the formation of a racemized **3k** cocrystal during the crystallization process, where a small portion of the other enantiomer preferentially combined to precipitate.

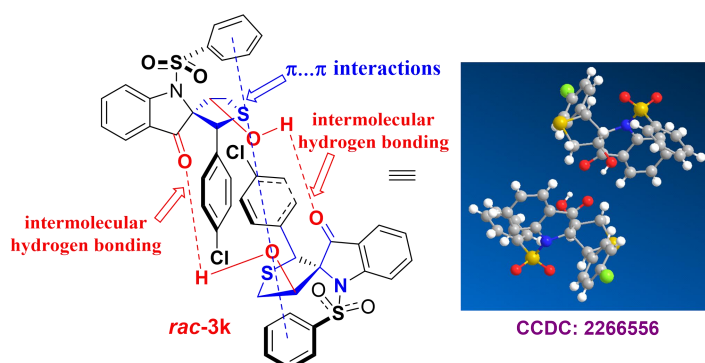

**Figure S2.** X-ray of *rac-3k* cocrystal.

## 9. The effects of *Z/E* configurations of 2-ylideneoxindole **1** for the asymmetric sulfa-Michael/aldol cascade reaction

To investigate the effects of *Z/E* configurations of 2-ylideneoxindole **1** on this asymmetric sulfa-Michael/aldol cascade reaction, (*E*)-2-ylideneoxindole **1** (**1a'** and **1x'**) was compared with (*Z*)-2-ylideneoxindole (**1a** and **1x**) under standard conditions, and the results are shown below.

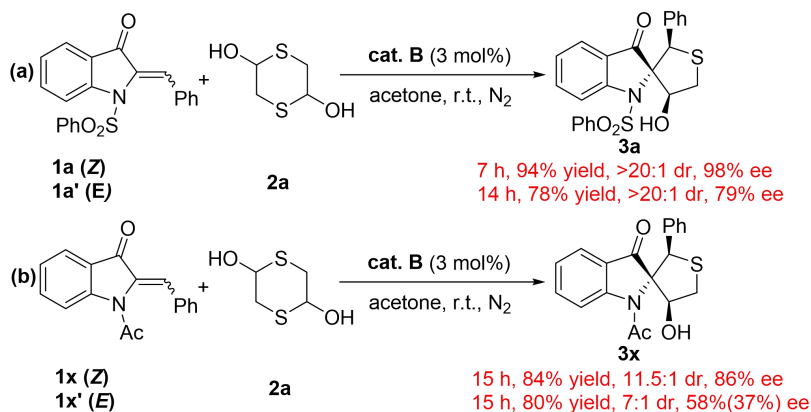

**Table S2.** Investigation the effects of catalyst **B** on the conformational transitions of various N1-substituted 2-ylideneoxindole substrates.

| <b>1</b>                | R <sup>1</sup>     | Time (h) | With cat. <b>B</b> | Without cat. <b>B</b> |
|-------------------------|--------------------|----------|--------------------|-----------------------|
|                         |                    |          | Z/E                | Z/E                   |
| <b>1a</b> ( <i>Z</i> )  | SO <sub>2</sub> Ph | 7        | 16/1               | 62/1                  |
| <b>1a'</b> ( <i>E</i> ) | SO <sub>2</sub> Ph | 14       | 1/3                | 1/15                  |
| <b>1x</b> ( <i>Z</i> )  | Ac                 | 15       | 7/1                | 6.5/1                 |
| <b>1x'</b> ( <i>E</i> ) | Ac                 | 15       | 1/2                | 1/16                  |
| <b>1ac</b> ( <i>Z</i> ) | H                  | 20       | 100/-              | 100/-                 |

Under standard reaction conditions in the absence of thiol **2a**, we further investigated the effect of catalyst **B** on the conformational transitions of various N1-substituted 2-ylideneoxindole substrates. After the reaction time, the reaction mixture was filtered over a short pad of silica. The filtered solution was concentrated under reduced pressure. The residual crude reaction mixture was dissolved in CDCl<sub>3</sub> for <sup>1</sup>H-NMR spectra to detect the conformational transitions of 2-ylideneoxindole **1** in the reaction system, and the results are shown in **Table S2**.

### NMR spectra of the above reaction system

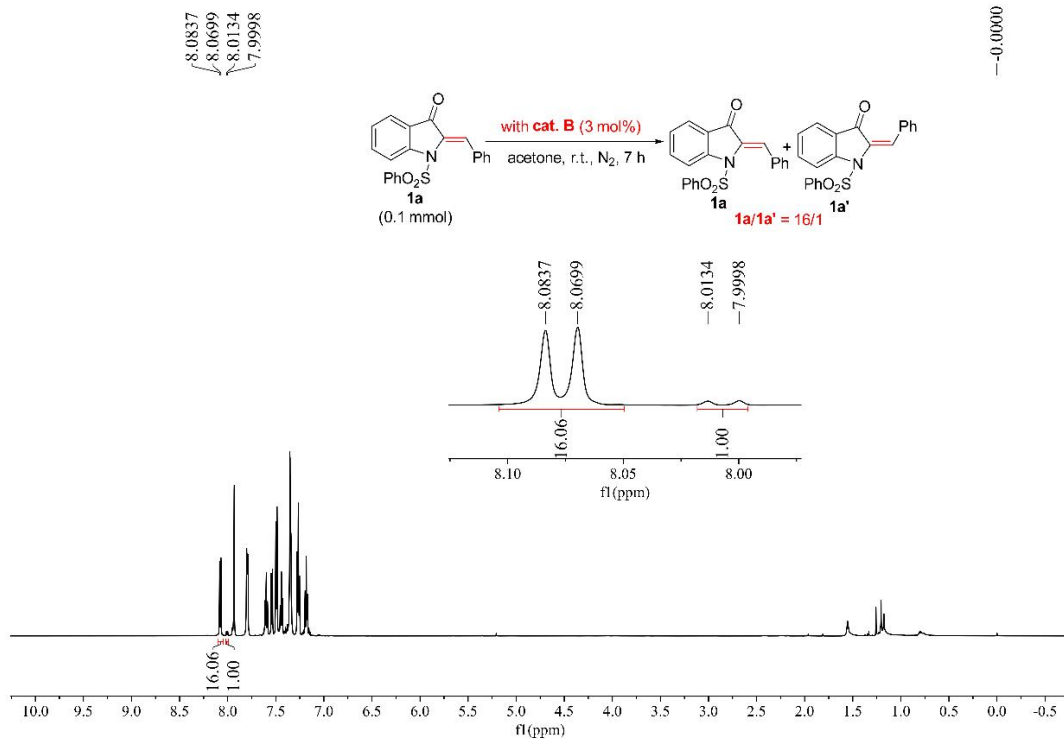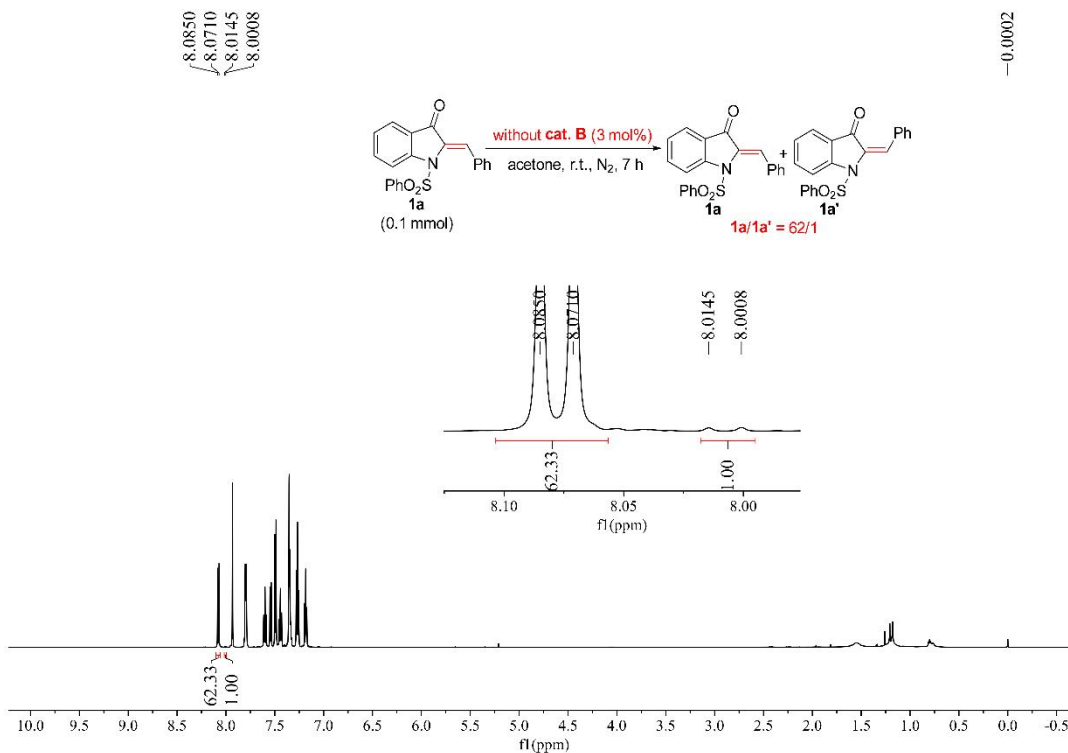

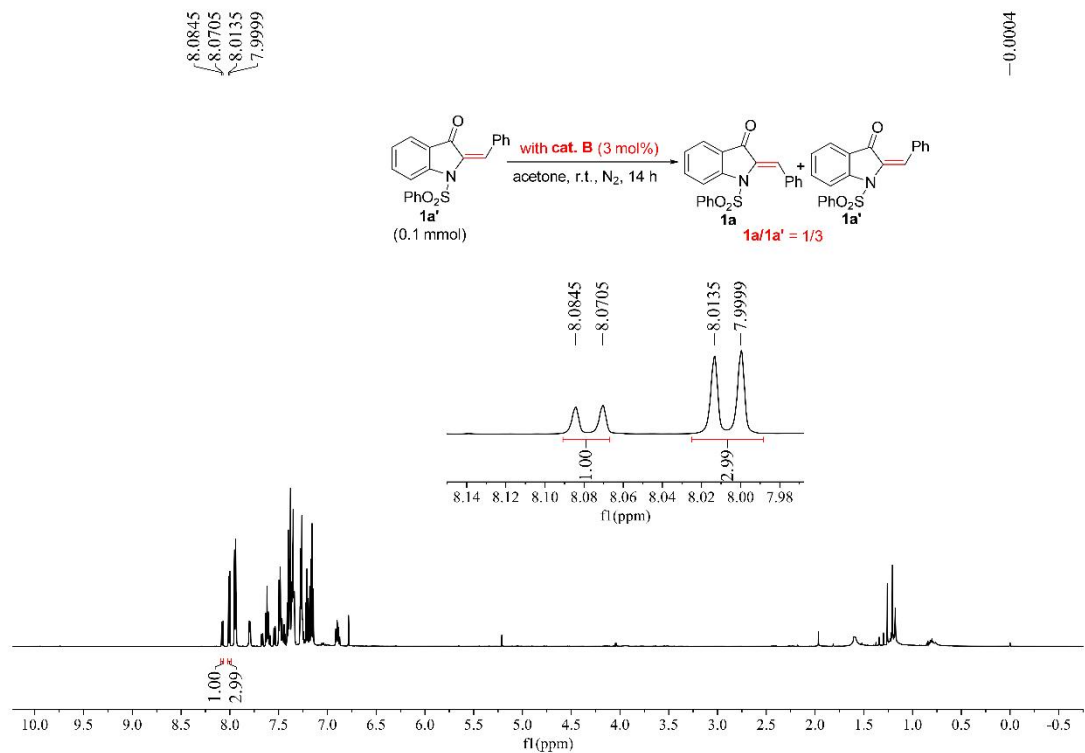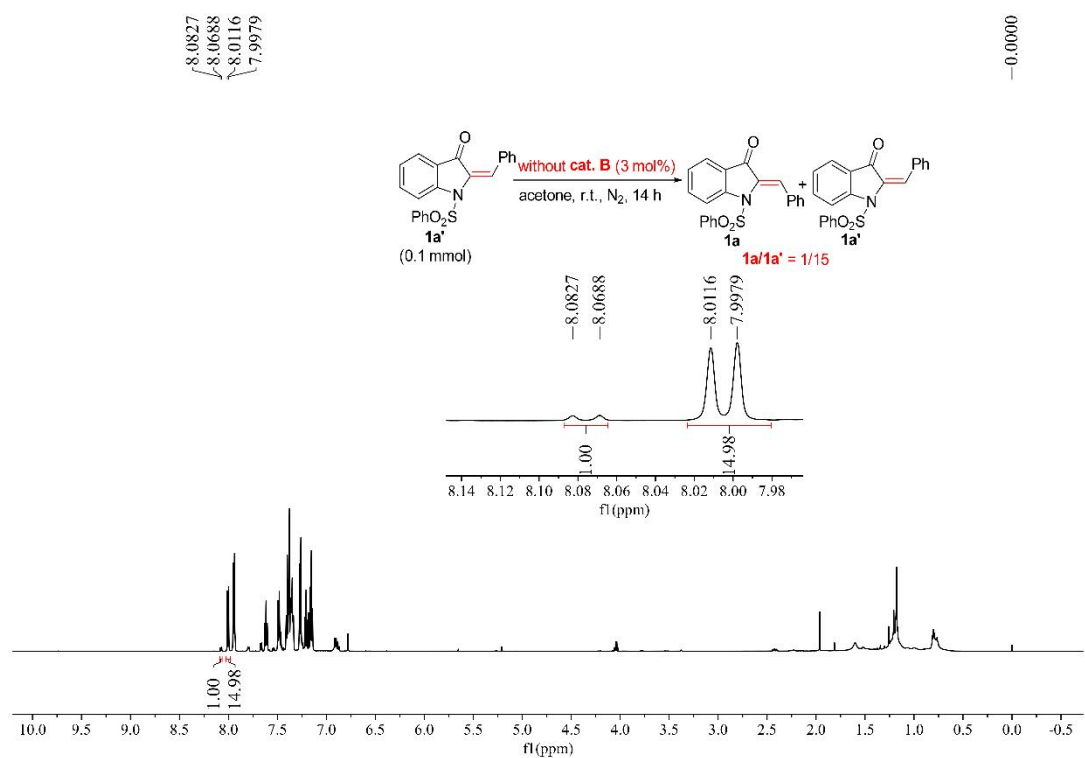

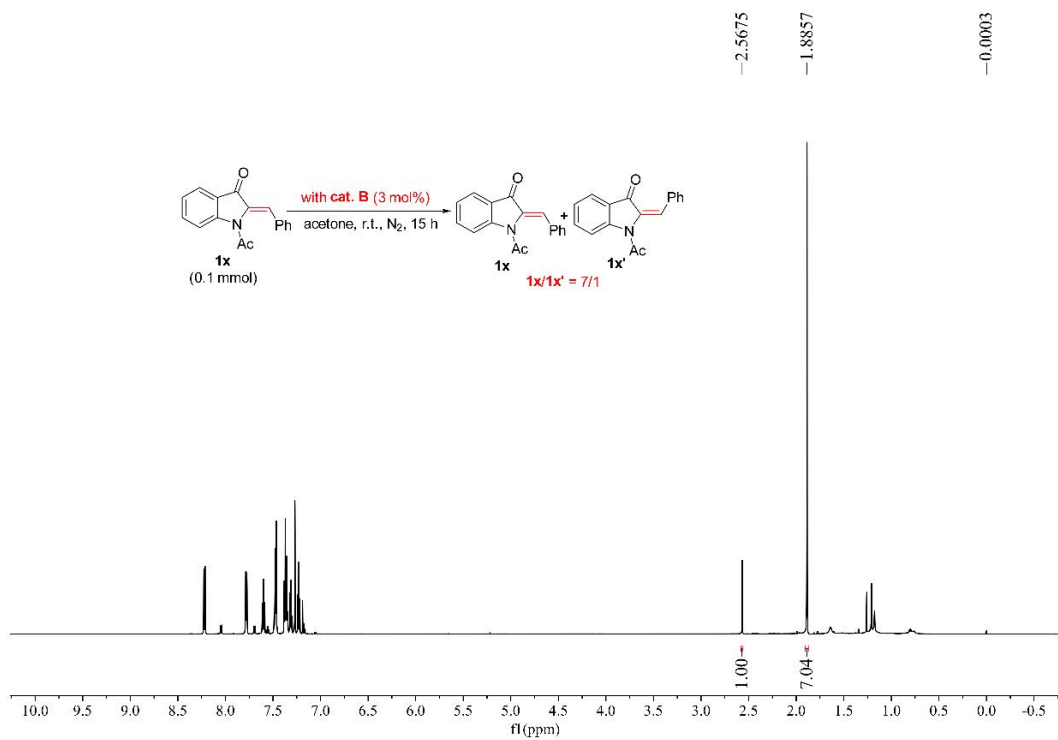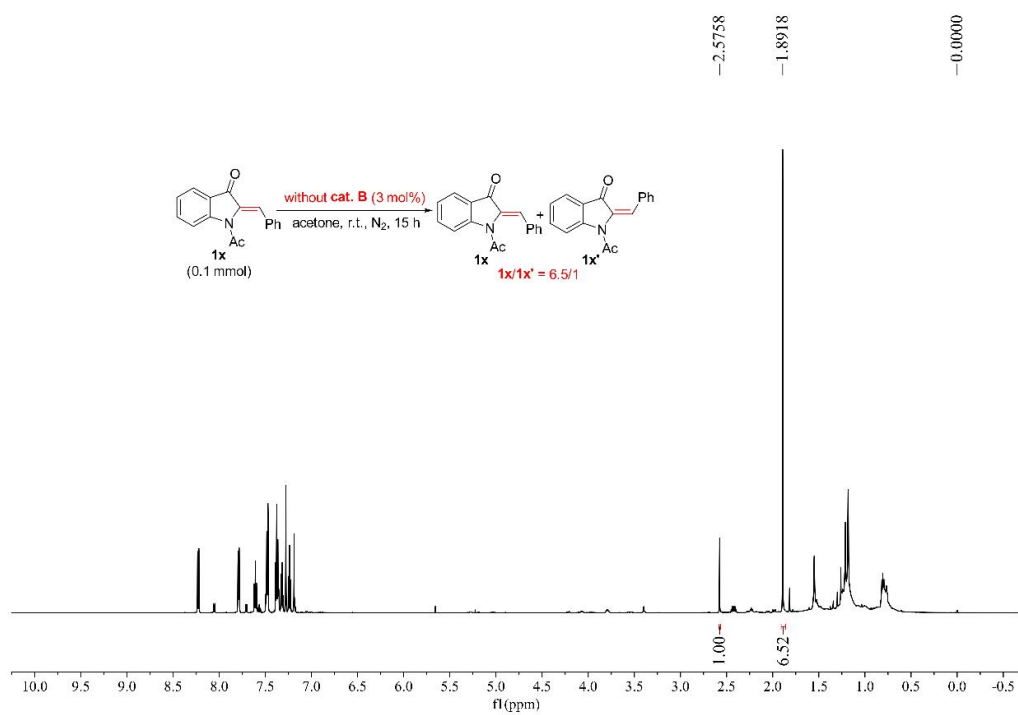

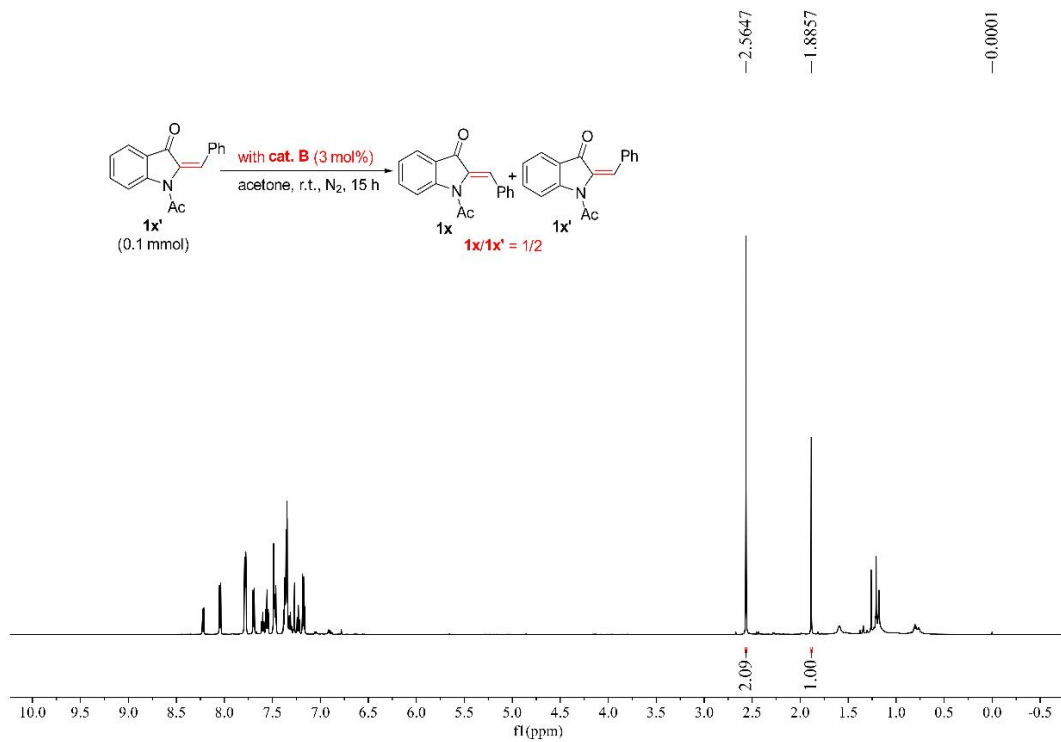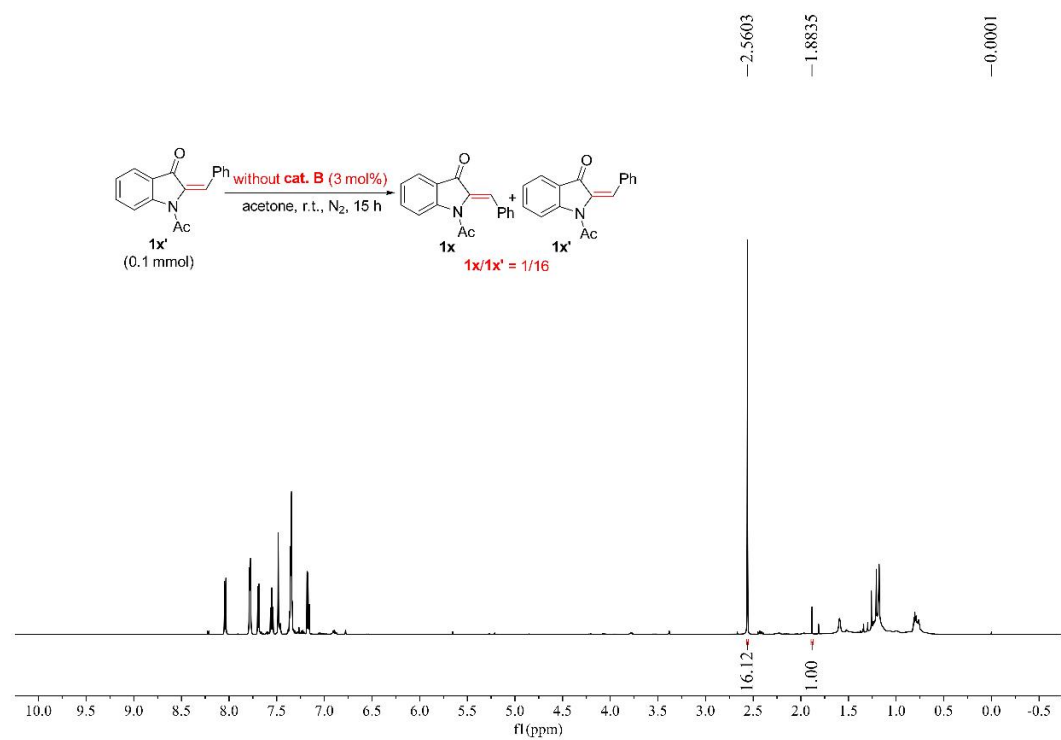

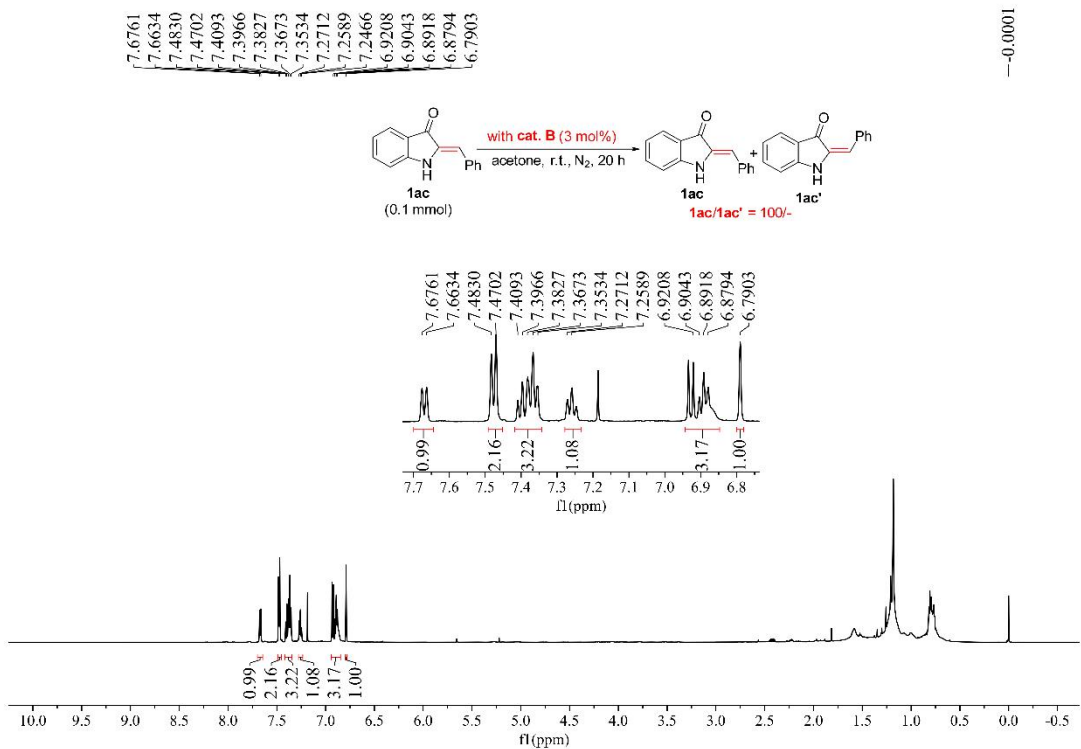

—0.0001

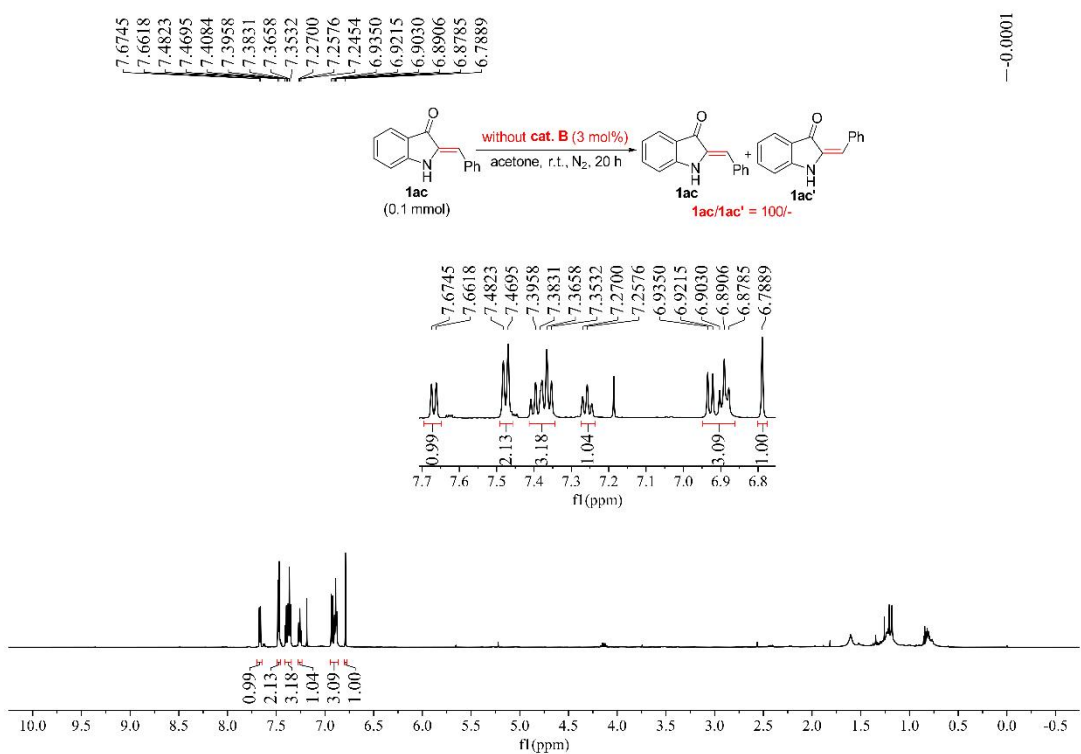

—0.0001



## 10. Characterization of products

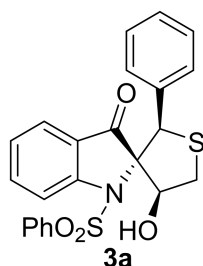

### (2*R*,2'*R*,4'*S*)-4'-hydroxy-2'-phenyl-1-(phenylsulfonyl)-4',5'-dihydro-2'*H*-spiro[indoline-2,3'-thiophen]-3-one (**3a**)

Following the general procedure, the reaction was performed with (*Z*)-2-ylideneoxindole **1a** (36.1 mg, 0.10 mmol) and 1,4-dithiane-2,5-diol **2a** (9.1 mg, 0.06 mmol) at room temperature for 7 h. The resulting solution was concentrated and directly purified by flash column chromatography (eluted with petroleum ether/ethyl acetate = 5/1, v/v) to afford the desired product **3a** as a white solid in 94% yield (41.2 mg, >20:1 dr, 98% ee). **m. p.**: 117 – 118 °C.  $[\alpha]_D^{20} = 49.182$  (c 0.54, CHCl<sub>3</sub>). The **enantiomeric excess** was determined by HPLC with an IC-H column (*n*-hexane/*i*-PrOH = 90/10, flow rate 1.0 mL/min,  $\lambda = 254$  nm),  $t_R = 12.380$  min (major),  $t_R = 13.966$  min (minor), 98% ee. **<sup>1</sup>H NMR** (400 MHz, DMSO-*d*<sub>6</sub>):  $\delta$  8.25 – 8.15 (m, 2H), 7.77 – 7.71 (m, 1H), 7.67 – 7.60 (m, 2H), 7.53 – 7.35 (m, 4H), 7.34 – 7.28 (m, 1H), 7.19 – 7.05 (m, 3H), 6.99 – 6.89 (m, 1H), 5.99 (d,  $J = 4.6$  Hz, 1H), 5.63 (s, 1H), 5.51 (ddd,  $J = 9.6, 7.6, 4.7$  Hz, 1H), 3.72 (t,  $J = 9.6$  Hz, 1H), 3.18 (dd,  $J = 9.5, 7.7$  Hz, 1H). **<sup>13</sup>C NMR** (100 MHz, DMSO-*d*<sub>6</sub>):  $\delta$  194.1, 151.4, 138.6, 137.0, 134.4, 134.3, 129.7, 128.8, 128.1, 128.0, 127.7, 123.4, 123.3, 122.8, 113.9, 85.1, 73.8, 48.8, 30.3. **HRMS** (ESI)  $m/z$ : calculated for C<sub>23</sub>H<sub>19</sub>NNaO<sub>4</sub>S<sub>2</sub><sup>+</sup> [M+Na]<sup>+</sup>: 460.0648, found: 460.0646.

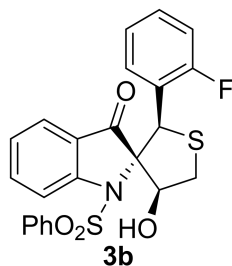

### (2*R*,2'*R*,4'*S*)-2'-(2-fluorophenyl)-4'-hydroxy-1-(phenylsulfonyl)-4',5'-dihydro-2'*H*-spiro[indoline-2,3'-thiophen]-3-one (**3b**)

Following the general procedure, the reaction was performed with (*Z*)-2-ylideneoxindole **1b** (38.0 mg, 0.10 mmol) and 1,4-dithiane-2,5-diol **2a** (9.1 mg, 0.06 mmol) at room temperature for 7.5 h. The resulting solution was concentrated and directly purified by flash column chromatography (eluted with petroleum ether/ethyl acetate = 5/1, v/v) to afford the desired product **3b** as a white solid in 92% yield (42.0 mg, >20:1 dr, 99% ee). **m. p.:** 103 – 104 °C.  $[\alpha]_D^{20} = 43.197$  (*c* 0.71, CHCl<sub>3</sub>). The **enantiomeric excess** was determined by HPLC with an IC-H column (*n*-hexane/*i*-PrOH = 90/10, flow rate 1.0 mL/min,  $\lambda = 254$  nm),  $t_R = 18.195$  min (major),  $t_R = 20.947$  min (minor), 99% ee. **<sup>1</sup>H NMR** (400 MHz, DMSO-*d*<sub>6</sub>):  $\delta$  8.16 – 8.09 (m, 2H), 7.74 – 7.66 (m, 2H), 7.65 – 7.51 (m, 4H), 7.40 – 7.33 (m, 1H), 7.19 – 7.10 (m, 1H), 7.08 – 6.91 (m, 3H), 6.02 (s, 1H), 5.79 (d, *J* = 4.4 Hz, 1H), 5.50 (ddd, *J* = 9.7, 7.5, 4.4 Hz, 1H), 3.76 (t, *J* = 9.6 Hz, 1H), 3.18 (dd, *J* = 9.5, 7.5 Hz, 1H). **<sup>13</sup>C NMR** (100 MHz, DMSO-*d*<sub>6</sub>):  $\delta$  194.4, 160.6 (d, *J* = 245.7 Hz), 151.7, 138.9, 137.3, 134.0, 131.5 (d, *J* = 3.1 Hz), 130.0 (d, *J* = 8.2 Hz), 129.5, 127.5, 123.9 (d, *J* = 3.2 Hz), 123.4 (d, *J* = 8.1 Hz), 122.7, 122.0 (d, *J* = 12.9 Hz), 115.0, 114.7, 114.3, 84.3, 74.1, 40.9, 30.6. **<sup>19</sup>F NMR** (376 MHz, DMSO-*d*<sub>6</sub>):  $\delta$  -115.1 – -115.3 (m). **HRMS** (ESI) *m/z*: calculated for C<sub>23</sub>H<sub>18</sub>FNNaO<sub>4</sub>S<sub>2</sub><sup>+</sup> [M+Na]<sup>+</sup>: 478.0553, found: 478.0548.

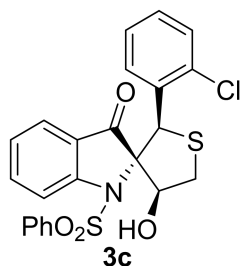

**(2*R*,2'*R*,4'*S*)-2'-(2-chlorophenyl)-4'-hydroxy-1-(phenylsulfonyl)-4',5'-dihydro-2'*H*-spiro[indoline-2,3'-thiophen]-3-one (3c)**

Following the general procedure, the reaction was performed with (*Z*)-2-ylideneoxindole **1c** (39.6 mg, 0.10 mmol) and 1,4-dithiane-2,5-diol **2a** (9.1 mg, 0.06 mmol) at room temperature for 11 h. The resulting solution was concentrated and directly purified by flash column chromatography (eluted with petroleum ether/ethyl acetate = 5/1, v/v) to afford the desired product **3c** as a white solid in 90% yield (42.5

mg, >20:1 dr, 85% ee). **m. p.:** 110 – 111 °C.  $[\alpha]_D^{20} = 80.128$  (*c* 0.58, CHCl<sub>3</sub>). The **enantiomeric excess** was determined by HPLC with an IC-H column (*n*-hexane/*i*-PrOH = 90/10, flow rate 1.0 mL/min,  $\lambda = 254$  nm),  $t_R = 15.608$  min (major),  $t_R = 21.006$  min (minor), 85% ee. **<sup>1</sup>H NMR** (400 MHz, DMSO-*d*<sub>6</sub>):  $\delta$  8.11 – 8.04 (m, 2H), 7.82 – 7.74 (m, 2H), 7.72 – 7.63 (m, 1H), 7.63 – 7.52 (m, 3H), 7.42 – 7.35 (m, 1H), 7.24 – 7.15 (m, 2H), 7.15 – 7.08 (m, 1H), 7.08 – 6.99 (m, 1H), 6.14 (s, 1H), 5.69 (d, *J* = 4.3 Hz, 1H), 5.53 (ddd, *J* = 9.7, 7.3, 4.1 Hz, 1H), 3.83 (t, *J* = 9.7 Hz, 1H), 3.17 (dd, *J* = 9.5, 7.3 Hz, 1H). **<sup>13</sup>C NMR** (100 MHz, DMSO-*d*<sub>6</sub>):  $\delta$  194.5, 151.9, 139.1, 137.6, 134.0, 133.8, 133.4, 132.5, 129.7, 129.5, 129.1, 127.4, 126.7, 123.7, 123.6, 123.0, 114.7, 84.4, 74.4, 45.1, 31.0. **HRMS** (ESI) *m/z*: calculated for C<sub>23</sub>H<sub>18</sub>CINNaO<sub>4</sub>S<sub>2</sub><sup>+</sup> [M+Na]<sup>+</sup>: 494.0258, found: 494.0255.

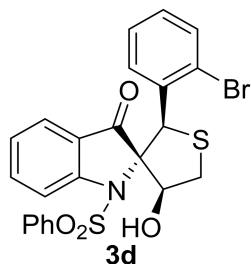

**(2*R*,2'*R*,4'*S*)-2'-(2-bromophenyl)-4'-hydroxy-1-(phenylsulfonyl)-4',5'-dihydro-2'*H*-spiro[indoline-2,3'-thiophen]-3-one (3d)**

Following the general procedure, the reaction was performed with (*Z*)-2-ylideneoxindole **1d** (44.0 mg, 0.10 mmol) and 1,4-dithiane-2,5-diol **2a** (9.1 mg, 0.06 mmol) at room temperature for 1.5 h. The resulting solution was concentrated and directly purified by flash column chromatography (eluted with petroleum ether/ethyl acetate = 5/1, v/v) to afford the desired product **3d** as a white solid in 90% yield (46.5 mg, >20:1 dr, 94% ee). **m. p.:** 167 – 168 °C.  $[\alpha]_D^{20} = 22.602$  (*c* 0.59, CHCl<sub>3</sub>). The **enantiomeric excess** was determined by HPLC with an IC-H column (*n*-hexane/*i*-PrOH = 90/10, flow rate 1.0 mL/min,  $\lambda = 254$  nm),  $t_R = 16.639$  min (major),  $t_R = 21.025$  min (minor), 94% ee. **<sup>1</sup>H NMR** (400 MHz, DMSO-*d*<sub>6</sub>):  $\delta$  8.08 – 8.01 (m, 2H), 7.83 – 7.70 (m, 2H), 7.71 – 7.50 (m, 4H), 7.45 – 7.35 (m, 2H), 7.26 – 7.17 (m, 1H), 7.09 – 6.99 (m, 2H), 6.08 (s, 1H), 5.68 (d, *J* = 4.4 Hz, 1H), 5.53 (ddd, *J* = 9.7, 7.3, 4.3

Hz, 1H), 3.83 (t,  $J = 9.7$  Hz, 1H), 3.16 (dd,  $J = 9.6, 7.4$  Hz, 1H).  $^{13}\text{C}$  NMR (100 MHz, DMSO- $d_6$ ):  $\delta$  194.6, 151.9, 139.2, 137.5, 135.2, 133.9, 132.6, 132.5, 130.0, 129.4, 127.2, 127.2, 124.5, 123.7, 123.6, 123.1, 114.8, 84.3, 74.4, 47.8, 31.1. HRMS (ESI)  $m/z$ : calculated for  $\text{C}_{23}\text{H}_{18}\text{BrNNaO}_4\text{S}_2^+$   $[\text{M}+\text{Na}]^+$ : 537.9753, found: 537.9745.

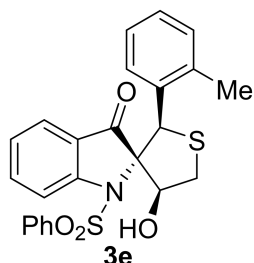

**(2*R*,2'*R*,4'*S*)-4'-hydroxy-1-(phenylsulfonyl)-2'-(*o*-tolyl)-4',5'-dihydro-2'*H*-spiro[indoline-2,3'-thiophen]-3-one (3e)**

Following the general procedure, the reaction was performed with (*Z*)-2-ylideneoxindole **1e** (37.5 mg, 0.10 mmol) and 1,4-dithiane-2,5-diol **2a** (9.1 mg, 0.06 mmol) at room temperature for 2 h. The resulting solution was concentrated and directly purified by flash column chromatography (eluted with petroleum ether/ethyl acetate = 5/1, v/v) to afford the desired product **3e** as a white solid in 91% yield (41.0 mg, >20:1 dr, 97% ee). **m. p.**: 183 – 184 °C.  $[\alpha]_{\text{D}}^{20} = 22.602$  ( $c$  0.59,  $\text{CHCl}_3$ ). The **enantiomeric excess** was determined by HPLC with an IC-H column (*n*-hexane/*i*-PrOH = 95/5, flow rate 1.0 mL/min,  $\lambda = 254$  nm),  $t_{\text{R}} = 43.111$  min (minor),  $t_{\text{R}} = 52.326$  min (major), 97% ee.  $^1\text{H}$  NMR (400 MHz, DMSO- $d_6$ ):  $\delta$  8.12 – 8.05 (m, 2H), 7.73 – 7.62 (m, 3H), 7.60 – 7.52 (m, 3H), 7.46 – 7.40 (m, 1H), 7.07 – 6.94 (m, 4H), 5.90 (s, 1H), 5.66 (d,  $J = 4.4$  Hz, 1H), 5.52 (ddd,  $J = 9.6, 7.5, 4.4$  Hz, 1H), 3.81 (t,  $J = 9.6$  Hz, 1H), 3.17 (dd,  $J = 9.5, 7.5$  Hz, 1H), 2.45 (s, 3H).  $^{13}\text{C}$  NMR (100 MHz, DMSO- $d_6$ ):  $\delta$  194.7, 151.4, 138.6, 137.3, 137.2, 134.1, 133.4, 130.3, 130.1, 129.4, 127.7, 127.5, 125.5, 123.7, 123.6, 123.4, 114.5, 84.8, 73.9, 44.9, 30.8, 19.8. HRMS (ESI)  $m/z$ : calculated for  $\text{C}_{24}\text{H}_{21}\text{NNaO}_4\text{S}_2^+$   $[\text{M}+\text{Na}]^+$ : 474.0804, found: 474.0801.

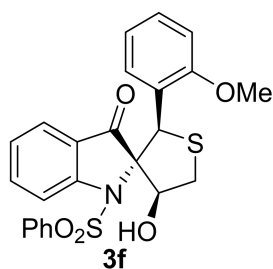

**(2*R*,2'*R*,4'*S*)-4'-hydroxy-2'-(2-methoxyphenyl)-1-(phenylsulfonyl)-4',5'-dihydro-2'*H*-spiro[indoline-2,3'-thiophen]-3-one (3f)**

Following the general procedure, the reaction was performed with (*Z*)-2-ylideneoxindole **1f** (39.0 mg, 0.10 mmol) and 1,4-dithiane-2,5-diol **2a** (9.1 mg, 0.06 mmol) at room temperature for 1.5 h. The resulting solution was concentrated and directly purified by flash column chromatography (eluted with petroleum ether/ethyl acetate = 5/1, v/v) to afford the desired product **3f** as a white solid in 82% yield (38.4 mg, >20:1 dr, 83% ee). **m. p.**: 101 – 102 °C.  $[\alpha]_D^{20} = -1.354$  (*c* 0.64, CHCl<sub>3</sub>). The **enantiomeric excess** was determined by HPLC with an IC-H column (*n*-hexane/*i*-PrOH = 95/5, flow rate 1.0 mL/min,  $\lambda = 254$  nm),  $t_R = 18.158$  min (minor),  $t_R = 22.560$  min (major), 83% ee. **<sup>1</sup>H NMR** (600 MHz, DMSO-*d*<sub>6</sub>):  $\delta$  8.15 – 8.10 (m, 2H), 7.71 – 7.65 (m, 1H), 7.66 – 7.61 (m, 1H), 7.61 – 7.55 (m, 3H), 7.55 – 7.49 (m, 1H), 7.34 – 7.28 (m, 1H), 7.07 – 7.01 (m, 1H), 6.96 (t, *J* = 7.4 Hz, 1H), 6.79 – 6.73 (m, 1H), 6.70 – 6.66 (m, 1H), 6.16 (s, 1H), 5.74 (d, *J* = 4.5 Hz, 1H), 5.50 (ddd, *J* = 9.8, 7.3, 4.5 Hz, 1H), 3.76 (t, *J* = 9.7 Hz, 1H), 3.61 (s, 3H), 3.11 (dd, *J* = 9.6, 7.4 Hz, 1H). **<sup>13</sup>C NMR** (150 MHz, DMSO-*d*<sub>6</sub>):  $\delta$  194.8, 157.5, 151.9, 139.4, 136.9, 133.8, 130.8, 129.4, 129.0, 127.4, 123.3, 123.2, 123.0, 122.8, 119.5, 114.0, 109.8, 84.5, 74.7, 55.0, 41.9, 30.8. **HRMS** (ESI) *m/z*: calculated for C<sub>24</sub>H<sub>21</sub>NNaO<sub>5</sub>S<sub>2</sub><sup>+</sup> [M+Na]<sup>+</sup>: 490.0753, found: 490.0755.

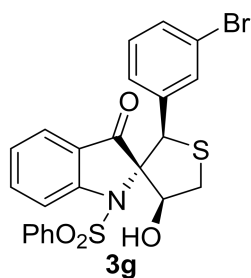

**(2*R*,2'*R*,4'*S*)-2'-(3-bromophenyl)-4'-hydroxy-1-(phenylsulfonyl)-4',5'-dihydro-2'*H*-spiro[indoline-2,3'-thiophen]-3-one (3g)**

Following the general procedure, the reaction was performed with (*Z*)-2-ylideneoxindole **1g** (44.0 mg, 0.10 mmol) and 1,4-dithiane-2,5-diol **2a** (9.1 mg, 0.06 mmol) at room temperature for 2.5 h. The resulting solution was concentrated and directly purified by flash column chromatography (eluted with petroleum ether/ethyl acetate = 5/1, v/v) to afford the desired product **3g** as a white solid in 88% yield (45.4 mg, >20:1 dr, 93% ee). **m. p.**: 111 – 112 °C.  $[\alpha]_{\text{D}}^{20} = 42.684$  (*c* 0.83, CHCl<sub>3</sub>). The **enantiomeric excess** was determined by HPLC with an IC-H column (*n*-hexane/*i*-PrOH = 90/10, flow rate 1.0 mL/min,  $\lambda = 254$  nm),  $t_{\text{R}} = 10.569$  min (major),  $t_{\text{R}} = 11.732$  min (minor), 93% ee. **<sup>1</sup>H NMR** (400 MHz, DMSO-*d*<sub>6</sub>):  $\delta$  8.27 – 8.19 (m, 2H), 7.79 – 7.70 (m, 1H), 7.69 – 7.57 (m, 3H), 7.56 – 7.47 (m, 1H), 7.45 – 7.26 (m, 4H), 7.10 (t, *J* = 7.9 Hz, 1H), 7.03 – 6.94 (m, 1H), 6.06 (d, *J* = 4.7 Hz, 1H), 5.61 (s, 1H), 5.51 (ddd, *J* = 9.8, 7.6, 4.6 Hz, 1H), 3.71 (t, *J* = 9.6 Hz, 1H), 3.19 (dd, *J* = 9.4, 7.6 Hz, 1H). **<sup>13</sup>C NMR** (100 MHz, DMSO-*d*<sub>6</sub>):  $\delta$  194.0, 151.4, 138.4, 137.4, 137.3, 134.5, 131.4, 131.0, 130.1, 129.8, 127.7, 123.5, 123.5, 122.7, 121.2, 113.9, 99.5, 84.9, 73.9, 48.1, 30.3. **HRMS** (ESI) *m/z*: calculated for C<sub>23</sub>H<sub>18</sub>BrNNaO<sub>4</sub>S<sub>2</sub><sup>+</sup> [M+Na]<sup>+</sup>: 537.9753, found: 537.9755.

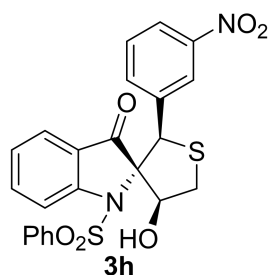

**(2*R*,2'*R*,4'*S*)-4'-hydroxy-2'-(3-nitrophenyl)-1-(phenylsulfonyl)-4',5'-dihydro-2'*H*-spiro[indoline-2,3'-thiophen]-3-one (3h)**

Following the general procedure, the reaction was performed with (*Z*)-2-ylideneoxindole **1h** (40.6 mg, 0.10 mmol) and 1,4-dithiane-2,5-diol **2a** (9.1 mg, 0.06 mmol) at room temperature for 1 h. The resulting solution was concentrated and directly purified by flash column chromatography (eluted with petroleum ether/ethyl

acetate = 5/1, v/v) to afford the desired product **3h** as a white solid in 90% yield (43.5 mg, >20:1 dr, 98% ee). **m. p.:** 191 – 192 °C.  $[\alpha]_D^{20} = 12.857$  (*c* 0.84, CHCl<sub>3</sub>); The **enantiomeric excess** was determined by HPLC with an IC-H column (*n*-hexane/*i*-PrOH = 90/10, flow rate 1.0 mL/min,  $\lambda = 254$  nm),  $t_R = 23.225$  min (minor),  $t_R = 30.140$  min (major), 98% ee. **<sup>1</sup>H NMR** (400 MHz, DMSO-*d*<sub>6</sub>):  $\delta$  8.35 – 8.21 (m, 3H), 8.01 – 7.94 (m, 1H), 7.84 – 7.71 (m, 2H), 7.69 – 7.60 (m, 2H), 7.54 – 7.38 (m, 3H), 7.34 – 7.28 (m, 1H), 7.00 – 6.91 (m, 1H), 6.11 (d, *J* = 4.6 Hz, 1H), 5.76 (s, 1H), 5.55 (ddd, *J* = 9.7, 7.5, 4.6 Hz, 1H), 3.76 (t, *J* = 9.7 Hz, 1H), 3.23 (dd, *J* = 9.5, 7.5 Hz, 1H). **<sup>13</sup>C NMR** (100 MHz, DMSO-*d*<sub>6</sub>):  $\delta$  194.0, 151.4, 147.3, 138.3, 137.4, 137.3, 135.2, 134.5, 129.8, 129.7, 127.7, 123.6, 123.5, 123.4, 123.1, 122.5, 113.9, 84.8, 74.0, 48.0, 30.4. **HRMS** (ESI) *m/z*: calculated for C<sub>23</sub>H<sub>18</sub>N<sub>2</sub>NaO<sub>6</sub>S<sub>2</sub><sup>+</sup> [M+Na]<sup>+</sup>: 505.0498, found: 505.0498.

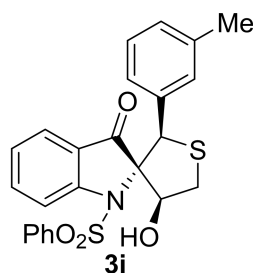

**(2*R*,2'*R*,4'*S*)-4'-hydroxy-1-(phenylsulfonyl)-2'-(*m*-tolyl)-4',5'-dihydro-2'*H*-spiro[indoline-2,3'-thiophen]-3-one (**3i**)**

Following the general procedure, the reaction was performed with (*Z*)-2-ylideneoxindole **1i** (37.5 mg, 0.10 mmol) and 1,4-dithiane-2,5-diol **2a** (9.1 mg, 0.06 mmol) at room temperature for 2 h. The resulting solution was concentrated and directly purified by flash column chromatography (eluted with petroleum ether/ethyl acetate = 5/1, v/v) to afford the desired product **3i** as a white solid in 94% yield (42.6 mg, >20:1 dr, 82% ee). **m. p.:** 126-127 °C.  $[\alpha]_D^{20} = 12.649$  (*c* 0.37, CHCl<sub>3</sub>). The **enantiomeric excess** was determined by HPLC with an IC-H column (*n*-hexane/*i*-PrOH = 90/10, flow rate 1.0 mL/min,  $\lambda = 254$  nm),  $t_R = 34.691$  min (major),  $t_R = 40.095$  min (minor), 82% ee (recrystallization up to 90% ee). **<sup>1</sup>H NMR** (400 MHz, DMSO-*d*<sub>6</sub>): <sup>1</sup>H NMR (400 MHz, DMSO-*d*<sub>6</sub>):  $\delta$  8.25 – 8.18 (m, 2H), 7.77 – 7.71 (m,

1H), 7.67 – 7.59 (m, 2H), 7.51 – 7.45 (m, 1H), 7.42 – 7.30 (m, 2H), 7.26 – 7.19 (m, 2H), 7.02 – 6.87 (m, 3H), 5.97 (d,  $J = 4.6$  Hz, 1H), 5.60 (s, 1H), 5.50 (ddd,  $J = 9.7, 7.6, 4.6$  Hz, 1H), 3.70 (t,  $J = 9.6$  Hz, 1H), 3.17 (dd,  $J = 9.5, 7.6$  Hz, 1H), 2.10 (s, 3H).  $^{13}\text{C}$  NMR (100 MHz, DMSO- $d_6$ ):  $\delta$  194.0, 151.4, 138.6, 136.9, 136.9, 134.4, 134.3, 129.7, 129.4, 128.6, 127.8, 127.6, 125.8, 123.3, 123.2, 122.9, 113.9, 85.1, 73.9, 48.6, 30.2, 20.9. HRMS (ESI)  $m/z$ : calculated for  $\text{C}_{24}\text{H}_{21}\text{NNaO}_4\text{S}_2^+$   $[\text{M}+\text{Na}]^+$ : 474.0804, found: 474.0803.

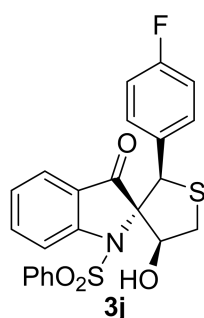

**(2*R*,2'*R*,4'*S*)-2'-(4-fluorophenyl)-4'-hydroxy-1-(phenylsulfonyl)-4',5'-dihydro-2'*H*-spiro[indoline-2,3'-thiophen]-3-one (3j)**

Following the general procedure, the reaction was performed with (*Z*)-2-ylideneoxindole **1j** (38.0 mg, 0.10 mmol) and 1,4-dithiane-2,5-diol **2a** (9.1 mg, 0.06 mmol) at room temperature for 7.5 h. The resulting solution was concentrated and directly purified by flash column chromatography (eluted with petroleum ether/ethyl acetate = 5/1, v/v) to afford the desired product **3j** as a white solid in 86% yield (39.0 mg, >20:1 dr, 98% ee). **m. p.**: 87 – 88 °C.  $[\alpha]_{\text{D}}^{20} = 48.998$  ( $c$  0.33,  $\text{CHCl}_3$ ). The **enantiomeric excess** was determined by HPLC with an IC-H column (*n*-hexane/*i*-PrOH = 90/10, flow rate 1.0 mL/min,  $\lambda = 254$  nm),  $t_{\text{R}} = 19.477$  min (major),  $t_{\text{R}} = 38.764$  min (minor), 98% ee.  $^1\text{H}$  NMR (400 MHz, DMSO- $d_6$ ):  $\delta = 8.16 - 8.10$  (m, 2H), 7.74 – 7.66 (m, 2H), 7.65 – 7.48 (m, 4H), 7.40 – 7.33 (m, 1H), 7.19 – 7.11 (m, 1H), 7.08 – 6.92 (m, 3H), 6.02 (s, 1H), 5.79 (d,  $J = 4.4$  Hz, 1H), 5.50 (ddd,  $J = 9.7, 7.5, 4.4$  Hz, 1H), 3.76 (t,  $J = 9.6$  Hz, 1H), 3.18 (dd,  $J = 9.5, 7.5$  Hz, 1H).  $^{13}\text{C}$  NMR (100 MHz, DMSO- $d_6$ ):  $\delta$  194.6, 160.8 (d,  $J = 246.8$  Hz), 151.9, 139.1, 137.6, 134.2, 131.7 (d,  $J = 2.6$  Hz), 130.2 (d,  $J = 8.1$  Hz), 129.7, 127.7, 124.1 (d,  $J = 2.9$  Hz), 123.7 (d,  $J = 8.1$  Hz), 122.9, 122.2 (d,  $J = 13.1$  Hz), 115.0 (d,  $J = 22.4$  Hz), 114.5, 84.5, 74.3,



41.1, 30.8.  $^{19}\text{F}$  NMR (376 MHz, DMSO- $d_6$ ):  $\delta$  -115.1 – -115.2 (m). HRMS (ESI)  $m/z$ : calculated for  $\text{C}_{23}\text{H}_{18}\text{FNNaO}_4\text{S}_2^+$   $[\text{M}+\text{Na}]^+$ : 478.0553, found: 478.0550.

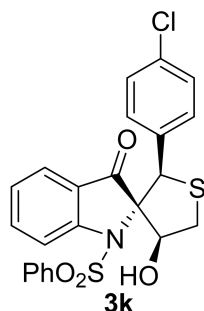

**(2*R*,2'*R*,4'*S*)-2'-(4-chlorophenyl)-4'-hydroxy-1-(phenylsulfonyl)-4',5'-dihydro-2'*H*-spiro[indoline-2,3'-thiophen]-3-one (3k)**

Following the general procedure, the reaction was performed with (*Z*)-2-ylideneoxindole **1k** (39.6 mg, 0.10 mmol) and 1,4-dithiane-2,5-diol **2a** (9.1 mg, 0.06 mmol) at room temperature for 11 h. The resulting solution was concentrated and directly purified by flash column chromatography (eluted with petroleum ether/ethyl acetate = 5/1, v/v) to afford the desired product **3k** as a white solid in 87% yield (41.0 mg, >20:1 dr, 91% ee). **m. p.**: 197 – 198 °C.  $[\alpha]_D^{20} = 65.079$  ( $c$  0.83,  $\text{CHCl}_3$ ). The **enantiomeric excess** was determined by HPLC with an IA-H column (*n*-hexane/*i*-PrOH = 90/10, flow rate 1.0 mL/min,  $\lambda = 254$  nm),  $t_R = 28.962$  min (major),  $t_R = 40.891$  min (minor), 91% ee (recrystallization up to 98% ee).  $^1\text{H}$  NMR (400 MHz, DMSO- $d_6$ ):  $\delta$  8.25 – 8.18 (m, 2H), 7.79 – 7.70 (m, 1H), 7.69 – 7.60 (m, 2H), 7.56 – 7.47 (m, 1H), 7.47 – 7.31 (m, 4H), 7.26 – 7.18 (m, 2H), 6.99 (t,  $J = 7.4$  Hz, 1H), 6.02 (d,  $J = 4.6$ , 1H), 5.62 (s, 1H), 5.50 (ddd,  $J = 9.7, 7.5, 4.6$  Hz, 1H), 3.71 (t,  $J = 9.6$  Hz, 1H), 3.19 (dd,  $J = 9.5, 7.7$  Hz, 1H).  $^{13}\text{C}$  NMR (100 MHz, DMSO- $d_6$ ):  $\delta$  194.0, 151.4, 138.4, 137.3, 134.4, 133.6, 132.7, 130.6, 129.7, 128.0, 127.7, 123.5, 123.5, 122.7, 113.9, 85.0, 73.9, 48.1, 30.3. HRMS (ESI)  $m/z$ : calculated for  $\text{C}_{23}\text{H}_{18}\text{ClNNaO}_4\text{S}_2^+$   $[\text{M}+\text{Na}]^+$ : 494.0258, found: 494.0257.

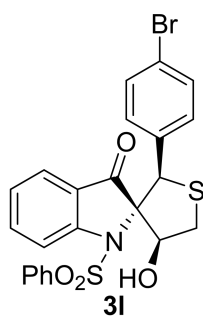

**(2*R*,2'*R*,4'*S*)-2'-(4-bromophenyl)-4'-hydroxy-1-(phenylsulfonyl)-4',5'-dihydro-2'*H*-spiro[indoline-2,3'-thiophen]-3-one (3l)**

Following the general procedure, the reaction was performed with (*Z*)-2-ylideneoxindole **1l** (44.0 mg, 0.10 mmol) and 1,4-dithiane-2,5-diol **2a** (9.1 mg, 0.06 mmol) at room temperature for 5 h. The resulting solution was concentrated and directly purified by flash column chromatography (eluted with petroleum ether/ethyl acetate = 5/1, v/v) to afford the desired product **3l** as a white solid in 95% yield (49.0 mg, >20:1 dr, 90% ee). **m. p.**: 189 – 190 °C.  $[\alpha]_D^{20} = 2.679$  (*c* 0.73, CHCl<sub>3</sub>). The **enantiomeric excess** was determined by HPLC with an IA-H column (*n*-hexane/*i*-PrOH = 90/10, flow rate 1.0 mL/min,  $\lambda = 254$  nm),  $t_R = 31.059$  min (major),  $t_R = 45.987$  min (minor), 90% ee (recrystallization up to 98% ee). **<sup>1</sup>H NMR** (400 MHz, DMSO-*d*<sub>6</sub>):  $\delta$  8.25 – 8.18 (m, 2H), 7.79 – 7.70 (m, 1H), 7.68 – 7.60 (m, 2H), 7.55 – 7.47 (m, 1H), 7.44 – 7.32 (m, 6H), 7.03 – 6.95 (m, 1H), 6.02 (d, *J* = 4.6 Hz, 1H), 5.61 (s, 1H), 5.50 (ddd, *J* = 9.7, 7.6, 4.6 Hz, 1H), 3.71 (t, *J* = 9.6 Hz, 1H), 3.18 (dd, *J* = 9.5, 7.6 Hz, 1H). **<sup>13</sup>C NMR** (100 MHz, DMSO-*d*<sub>6</sub>):  $\delta$  194.0, 151.4, 138.4, 137.3, 134.4, 134.1, 131.0, 130.9, 129.7, 127.7, 123.5, 123.5, 122.7, 121.3, 113.9, 84.9, 73.9, 48.1, 30.3. **HRMS** (ESI) *m/z*: calculated for C<sub>23</sub>H<sub>18</sub>BrNNaO<sub>4</sub>S<sub>2</sub><sup>+</sup> [M+Na]<sup>+</sup>: 537.9753, found: 537.9749.

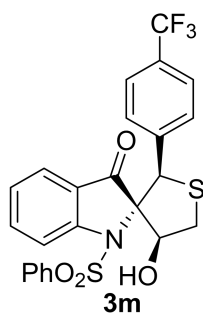

**(2*R*,2'*R*,4'*S*)-4'-hydroxy-1-(phenylsulfonyl)-2'-(4-(trifluoromethyl)phenyl)-4',5'-dihydro-2'*H*-spiro[indoline-2,3'-thiophen]-3-one (3m)**

Following the general procedure, the reaction was performed with (*Z*)-2-ylideneoxindole **1m** (43.0 mg, 0.10 mmol) and 1,4-dithiane-2,5-diol **2a** (9.1 mg, 0.06 mmol) at room temperature for 1 h. The resulting solution was concentrated and directly purified by flash column chromatography (eluted with petroleum ether/ethyl acetate = 5/1, v/v) to afford the desired product **3m** as a white solid in 88% yield (44.5 mg, >20:1 dr, 94% ee). **m. p.:** 152 – 153 °C.  $[\alpha]_{\text{D}}^{20} = 65.079$  (*c* 0.83, CHCl<sub>3</sub>). The **enantiomeric excess** was determined by HPLC with an IC-H column (*n*-hexane/*i*-PrOH = 90/10, flow rate 1.0 mL/min,  $\lambda = 254$  nm),  $t_{\text{R}} = 11.875$  min (major),  $t_{\text{R}} = 13.372$  min (minor), 94% ee. **<sup>1</sup>H NMR** (600 MHz, DMSO-*d*<sub>6</sub>):  $\delta$  8.24 – 8.20 (m, 2H), 7.77 – 7.72 (m, 1H), 7.64 (t, *J* = 8.2 Hz, 4H), 7.55 – 7.49 (m, 3H), 7.42 (d, *J* = 8.5 Hz, 1H), 7.34 – 7.31 (m, 1H), 6.97 (t, *J* = 7.4 Hz, 1H), 6.06 (d, *J* = 4.6 Hz, 1H), 5.71 (s, 1H), 5.53 (ddd, *J* = 9.7, 7.5, 4.6 Hz, 1H), 3.73 (t, *J* = 9.6 Hz, 1H), 3.21 (dd, *J* = 9.6, 7.6, 1H). **<sup>13</sup>C NMR** (150 MHz, DMSO-*d*<sub>6</sub>):  $\delta$  194.0, 151.4, 139.7, 138.4, 137.4, 134.5, 129.8, 129.7, 128.7, 128.5, 127.7, 124.9, 123.5, 123.0, 122.6, 114.0, 84.9, 74.1, 48.3, 30.3. **<sup>19</sup>F NMR** (565 MHz, DMSO-*d*<sub>6</sub>):  $\delta$  -61.1. **HRMS** (ESI) *m/z*: calculated for C<sub>24</sub>H<sub>18</sub>F<sub>3</sub>NNaO<sub>4</sub>S<sub>2</sub><sup>+</sup> [M+Na]<sup>+</sup>: 528.0522, found: 528.0522.

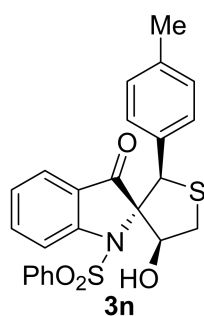

**(2*R*,2'*R*,4'*S*)-4'-hydroxy-1-(phenylsulfonyl)-2'-(*p*-tolyl)-4',5'-dihydro-2'*H*-spiro[indoline-2,3'-thiophen]-3-one (3n)**

Following the general procedure, the reaction was performed with (*Z*)-2-ylideneoxindole **1n** (37.5 mg, 0.10 mmol) and 1,4-dithiane-2,5-diol **2a** (9.1 mg, 0.06 mmol) at room temperature for 2 h. The resulting solution was concentrated and directly purified by flash column chromatography (eluted with petroleum ether/ethyl

acetate = 5/1, v/v) to afford the desired product **3n** as a white solid in 90% yield (40.5 mg, >20:1 dr, 83% ee). **m. p.:** 181 – 182 °C.  $[\alpha]_D^{20} = 37.181$  (*c* 0.28, CHCl<sub>3</sub>). The **enantiomeric excess** was determined by HPLC with an IC-H column (*n*-hexane/*i*-PrOH = 90/10, flow rate 1.0 mL/min,  $\lambda = 254$  nm),  $t_R = 14.300$  min (major),  $t_R = 19.859$  min (minor), 83% ee. **<sup>1</sup>H NMR** (400 MHz, DMSO-*d*<sub>6</sub>): <sup>1</sup>H NMR (400 MHz, DMSO-*d*<sub>6</sub>)  $\delta = 8.24 - 8.17$  (m, 2H), 7.77 – 7.71 (m, 1H), 7.66 – 7.59 (m, 2H), 7.52 – 7.45 (m, 1H), 7.39 – 7.28 (m, 4H), 7.00 – 6.90 (m, 3H), 5.95 (d, *J* = 4.6 Hz, 1H), 5.60 (s, 1H), 5.48 (ddd, *J* = 9.7, 7.6, 4.7 Hz, 1H), 3.69 (t, *J* = 9.6 Hz, 1H), 3.16 (dd, *J* = 9.4, 7.7 Hz, 1H), 2.11 (s, 3H). **<sup>13</sup>C NMR** (100 MHz, DMSO-*d*<sub>6</sub>):  $\delta$  194.1, 151.4, 138.6, 137.3, 137.0, 134.3, 131.4, 129.7, 128.7, 128.6, 127.6, 123.4, 123.2, 122.8, 113.9, 85.1, 73.8, 48.4, 30.2, 20.5. **HRMS** (ESI) *m/z*: calculated for C<sub>24</sub>H<sub>21</sub>NNaO<sub>4</sub>S<sub>2</sub><sup>+</sup> [M+Na]<sup>+</sup>: 474.0804, found: 474.0804.

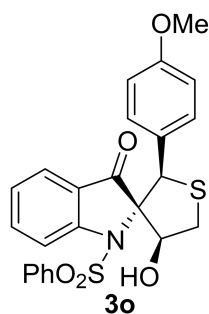

**(2*R*,2'*R*,4'*S*)-4'-hydroxy-2'-(4-methoxyphenyl)-1-(phenylsulfonyl)-4',5'-dihydro-2'*H*-spiro[indoline-2,3'-thiophen]-3-one (3o)**

Following the general procedure, the reaction was performed with (*Z*)-2-ylideneoxindole **1o** (39.1 mg, 0.10 mmol) and 1,4-dithiane-2,5-diol **2a** (9.1 mg, 0.06 mmol) at room temperature for 1.5 h. The resulting solution was concentrated and directly purified by flash column chromatography (eluted with petroleum ether/ethyl acetate = 5/1, v/v) to afford the desired product **3o** as a white solid in 89% yield (41.7 mg, >20:1 dr, 86% ee). **m. p.:** 169 – 170 °C.  $[\alpha]_D^{20} = 120.659$  (*c* 0.38, CHCl<sub>3</sub>). The **enantiomeric excess** was determined by HPLC with an IC-H column (*n*-hexane/*i*-PrOH = 90/10, flow rate 1.0 mL/min,  $\lambda = 254$  nm),  $t_R = 24.618$  min (major),  $t_R = 29.009$  min (minor), 86% ee (recrystallization up to 99% ee). **<sup>1</sup>H NMR** (400 MHz, DMSO-*d*<sub>6</sub>):  $\delta$  8.24 – 8.17 (m, 2H), 7.78 – 7.69 (m, 1H), 7.67 – 7.59 (m, 2H), 7.52 –

7.43 (m, 1H), 7.40 – 7.32 (m, 4H), 7.01 – 6.93 (m, 1H), 6.73 – 6.65 (m, 2H), 5.95 (d,  $J = 4.6$  Hz, 1H), 5.59 (s, 1H), 5.48 (ddd,  $J = 9.6, 7.6, 4.6$  Hz, 1H), 3.70 (t,  $J = 9.6$  Hz, 1H), 3.60 (s, 3H), 3.16 (dd,  $J = 9.5, 7.6$  Hz, 1H).  $^{13}\text{C}$  NMR (100 MHz, DMSO- $d_6$ ):  $\delta$  194.2, 158.9, 151.4, 138.6, 137.0, 134.3, 130.0, 129.7, 127.7, 126.0, 123.4, 123.3, 122.8, 113.9, 113.4, 85.3, 73.7, 55.0, 48.2, 30.2. HRMS (ESI)  $m/z$ : calculated for  $\text{C}_{24}\text{H}_{21}\text{NNaO}_5\text{S}_2^+$   $[\text{M}+\text{Na}]^+$ : 490.0753, found: 490.0753.

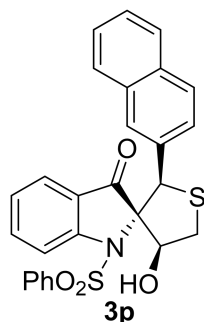

**(2*R*,2'*R*,4'*S*)-4'-hydroxy-2'-(naphthalen-2-yl)-1-(phenylsulfonyl)-4',5'-dihydro-2'*H*-spiro[indoline-2,3'-thiophen]-3-one (3p)**

Following the general procedure, the reaction was performed with (*Z*)-2-ylideneoxindole **1p** (41.1 mg, 0.10 mmol) and 1,4-dithiane-2,5-diol **2a** (9.1 mg, 0.06 mmol) at room temperature for 48 h. The resulting solution was concentrated and directly purified by flash column chromatography (eluted with petroleum ether/ethyl acetate = 5/1, v/v) to afford the desired product **3p** as a white solid in 82% yield (40.0 mg, >20:1 dr, 88% ee). **m. p.**: 186-187 °C.  $[\alpha]_D^{20} = 83.954$  ( $c$  0.56,  $\text{CHCl}_3$ ). The **enantiomeric excess** was determined by HPLC with an IA-H column (*n*-hexane/*i*-PrOH = 80/20, flow rate 0.8 mL/min,  $\lambda = 254$  nm),  $t_R = 17.648$  min (major),  $t_R = 19.043$  min (minor), 88% ee.  $^1\text{H}$  NMR (600 MHz, DMSO- $d_6$ ):  $\delta$  8.27 – 8.22 (m, 2H), 7.94 – 7.91 (m, 1H), 7.78 – 7.72 (m, 3H), 7.68 – 7.62 (m, 3H), 7.58 – 7.53 (m, 1H), 7.46 – 7.38 (m, 4H), 7.25 (d,  $J = 7.6$  Hz, 1H), 6.89 – 6.83 (m, 1H), 6.07 (d,  $J = 4.7$  Hz, 1H), 5.82 (s, 1H), 5.60 – 5.53 (m, 1H), 3.80 – 3.73 (m, 1H), 3.26 – 3.20 (m, 1H).  $^{13}\text{C}$  NMR (150 MHz, DMSO- $d_6$ ):  $\delta$  194.3, 151.5, 138.7, 137.2, 134.5, 132.6, 132.3, 129.8, 128.3, 127.9, 127.8, 127.6, 127.5, 126.5, 126.4, 126.4, 123.5, 123.4, 122.8, 114.0, 85.2, 74.2, 48.9, 30.4. HRMS (ESI)  $m/z$ : calculated for  $\text{C}_{27}\text{H}_{21}\text{NNaO}_4\text{S}_2^+$   $[\text{M}+\text{Na}]^+$ : 510.0804, found: 510.0804.

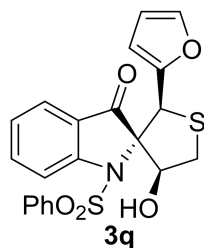

**(2R,2'S,4'S)-2'-(furan-2-yl)-4'-hydroxy-1-(phenylsulfonyl)-4',5'-dihydro-2'H-spiro[indoline-2,3'-thiophen]-3-one (3q)**

Following the general procedure, the reaction was performed with (*Z*)-2-ylideneoxindole **1q** (35.1 mg, 0.10 mmol) and 1,4-dithiane-2,5-diol **2a** (9.1 mg, 0.06 mmol) at room temperature for 5 h. The resulting solution was concentrated and directly purified by flash column chromatography (eluted with petroleum ether/ethyl acetate = 5/1, v/v) to afford the desired product **3q** as a white solid in 87% yield (37.0 mg, >20:1 dr, 90% ee). **m. p.**: 129-130 °C.  $[\alpha]_D^{20} = 109.344$  (*c* 0.82, CHCl<sub>3</sub>). The **enantiomeric excess** was determined by HPLC with an IC-H column (*n*-hexane/*i*-PrOH = 85/15, flow rate 1.0 mL/min,  $\lambda = 254$  nm),  $t_R = 25.472$  min (major),  $t_R = 33.676$  min (minor), 90% ee. **<sup>1</sup>H NMR** (400 MHz, DMSO-*d*<sub>6</sub>):  $\delta$  8.17 – 8.10 (m, 2H), 7.76 – 7.68 (m, 1H), 7.65 – 7.56 (m, 3H), 7.57 – 7.49 (m, 2H), 7.28 – 7.23 (m, 1H), 7.14 – 7.06 (m, 1H), 6.17 (dd, *J* = 3.3, 1.7 Hz, 1H), 6.12 (d, *J* = 3.3 Hz, 1H), 6.04 (d, *J* = 4.8 Hz, 1H), 5.63 (s, 1H), 5.40 (ddd, *J* = 9.7, 7.5, 4.8 Hz, 1H), 3.59 (t, *J* = 9.6 Hz, 1H), 3.10 (dd, *J* = 9.5, 7.5 Hz, 1H). **<sup>13</sup>C NMR** (100 MHz, DMSO-*d*<sub>6</sub>):  $\delta$  193.8, 151.6, 149.3, 143.0, 138.9, 137.1, 134.2, 129.7, 127.3, 123.6, 123.4, 122.7, 114.2, 110.5, 109.2, 83.0, 74.5, 40.9, 29.9. **HRMS** (ESI) *m/z*: calculated for C<sub>21</sub>H<sub>17</sub>NNaO<sub>5</sub>S<sub>2</sub><sup>+</sup> [M+Na]<sup>+</sup>: 450.0440, found: 450.0438.

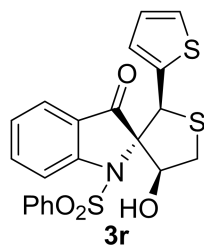

**(2R,2'S,4'S)-4'-hydroxy-1-(phenylsulfonyl)-2'-(thiophen-2-yl)-4',5'-dihydro-2'H-spiro[indoline-2,3'-thiophen]-3-one (3r)**

Following the general procedure, the reaction was performed with (*Z*)-2-ylideneoxindole **1r** (36.7 mg, 0.10 mmol) and 1,4-dithiane-2,5-diol **2a** (9.1 mg, 0.06 mmol) at room temperature for 4 h. The resulting solution was concentrated and directly purified by flash column chromatography (eluted with petroleum ether/ethyl acetate = 5/1, v/v) to afford the desired product **3r** as a white solid in 90% yield (40.0 mg, >20:1 dr, 93% ee). **m. p.:** 76 – 77 °C.  $[\alpha]_D^{20} = 82.514$  (*c* 0.52, CHCl<sub>3</sub>). The **enantiomeric excess** was determined by HPLC with an IC-H column (*n*-hexane/*i*-PrOH = 85/15, flow rate 1.0 mL/min,  $\lambda = 254$  nm),  $t_R = 17.153$  min (minor),  $t_R = 18.729$  min (major), 93% ee. **<sup>1</sup>H NMR** (400 MHz, DMSO-*d*<sub>6</sub>):  $\delta$  8.25 – 8.18 (m, 2H), 7.79 – 7.70 (m, 1H), 7.68 – 7.60 (m, 2H), 7.59 – 7.50 (m, 1H), 7.51 – 7.44 (m, 1H), 7.44 – 7.38 (m, 1H), 7.29 – 7.22 (m, 1H), 7.07 – 6.98 (m, 1H), 6.94 – 6.88 (m, 1H), 6.75 (dd, *J* = 5.1, 3.5 Hz, 1H), 6.05 (d, *J* = 4.7 Hz, 1H), 5.85 (s, 1H), 5.45 (ddd, *J* = 9.6, 7.6, 4.6 Hz, 1H), 3.67 (t, *J* = 9.6 Hz, 1H), 3.15 (dd, *J* = 9.5, 7.7 Hz, 1H). **<sup>13</sup>C NMR** (150 MHz, DMSO-*d*<sub>6</sub>):  $\delta$  193.9, 151.7, 138.6, 138.4, 137.1, 134.4, 129.8, 127.6, 126.9, 126.6, 126.6, 123.5, 123.4, 123.0, 114.0, 84.6, 73.7, 43.9, 30.4. **HRMS** (ESI) *m/z*: calculated for C<sub>21</sub>H<sub>17</sub>NNaO<sub>4</sub>S<sub>3</sub><sup>+</sup> [*M*+Na]<sup>+</sup>: 466.0212, found: 466.0213.

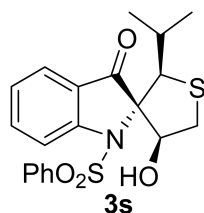

**(2*R*,2'*R*,4'*S*)-4'-hydroxy-2'-isopropyl-1-(phenylsulfonyl)-4',5'-dihydro-2'*H*-spiro[indoline-2,3'-thiophen]-3-one (3s)**

Following the general procedure, the reaction was performed with (*Z*)-2-ylideneoxindole **1s** (32.7 mg, 0.10 mmol) and 1,4-dithiane-2,5-diol **2a** (9.1 mg, 0.06 mmol) at room temperature for 2 h. The resulting solution was concentrated and directly purified by flash column chromatography (eluted with petroleum ether/ethyl acetate = 8/1, v/v) to afford the desired product **3s** as a colorless oil in 75% yield (30.3 mg, >20:1 dr, 93% ee).  $[\alpha]_D^{20} = 161.519$  (*c* 0.93, CHCl<sub>3</sub>). The **enantiomeric excess** was determined by HPLC with an IC-H column (*n*-hexane/*i*-PrOH = 90/10, flow rate 1.0

mL/min,  $\lambda = 254$  nm),  $t_R = 15.636$  min (major),  $t_R = 19.194$  min (minor), 93% ee. **<sup>1</sup>H NMR** (600 MHz, DMSO-*d*<sub>6</sub>):  $\delta$  8.19 – 8.15 (m, 2H), 7.78 – 7.70 (m, 1H), 7.70 – 7.62 (m, 4H), 7.59 (d,  $J = 8.7$  Hz, 1H), 7.22 – 7.16 (m, 1H), 5.92 (d,  $J = 4.5$  Hz, 1H), 5.29 (ddd,  $J = 10.1, 7.0, 4.6$  Hz, 1H), 4.08 (d,  $J = 10.5$  Hz, 1H), 3.30 (t,  $J = 9.9$  Hz, 1H), 2.87 (dd,  $J = 9.7, 7.0$  Hz, 1H), 1.74 – 1.64 (m, 1H), 0.81 (d,  $J = 6.5$  Hz, 3H), 0.34 (d,  $J = 6.6$  Hz, 3H). **<sup>13</sup>C NMR** (150 MHz, DMSO-*d*<sub>6</sub>):  $\delta$  195.4, 151.7, 139.0, 137.3, 134.3, 129.7, 127.5, 123.5, 114.6, 83.1, 79.2, 76.2, 51.3, 31.4, 28.4, 22.5, 19.9. **HRMS** (ESI)  $m/z$ : calculated for C<sub>20</sub>H<sub>21</sub>NNaO<sub>4</sub>S<sub>2</sub><sup>+</sup> [M+Na]<sup>+</sup>: 426.0804, found: 426.0802.

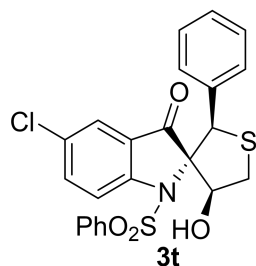

**(2*R*,2'*R*,4'*S*)-5-chloro-4'-hydroxy-2'-phenyl-1-(phenylsulfonyl)-4',5'-dihydro-2'*H*-spiro[indoline-2,3'-thiophen]-3-one (3t)**

Following the general procedure, the reaction was performed with (*Z*)-2-ylideneoxindole **1t** (39.6 mg, 0.10 mmol) and 1,4-dithiane-2,5-diol **2a** (9.1 mg, 0.06 mmol) at room temperature for 4 h. The resulting solution was concentrated and directly purified by flash column chromatography (eluted with petroleum ether/ethyl acetate = 5/1, v/v) to afford the desired product **3t** as a white solid in 90% yield (42.5 mg, >20:1 dr, 87% ee). **m. p.**: 76-77 °C.  $[\alpha]_D^{20} = 46.453$  ( $c$  0.56, CHCl<sub>3</sub>). The **enantiomeric excess** was determined by HPLC with an IC-H column (*n*-hexane/*i*-PrOH = 90/10, flow rate 1.0 mL/min,  $\lambda = 254$  nm),  $t_R = 9.548$  min (minor),  $t_R = 12.115$  min (major), 87% ee. **<sup>1</sup>H NMR** (400 MHz, DMSO-*d*<sub>6</sub>):  $\delta$  8.24 – 8.17 (m, 2H), 7.79 – 7.71 (m, 1H), 7.68 – 7.60 (m, 2H), 7.53 (dd,  $J = 8.9, 2.3$  Hz, 1H), 7.50 – 7.39 (m, 3H), 7.37 (d,  $J = 2.3$  Hz, 1H), 7.20 – 7.08 (m, 3H), 6.02 (d,  $J = 4.5$  Hz, 1H), 5.63 (s, 1H), 5.50 (ddd,  $J = 9.6, 7.6, 4.5$  Hz, 1H), 3.69 (t,  $J = 9.6$  Hz, 1H), 3.20 (dd,  $J = 9.6, 7.6$  Hz, 1H). **<sup>13</sup>C NMR** (100 MHz, DMSO-*d*<sub>6</sub>):  $\delta$  193.0, 150.1, 138.3, 136.6, 134.5, 134.1, 129.8, 128.7, 128.3, 128.1, 127.7, 127.6, 124.1, 122.6, 115.7, 85.9, 73.8, 48.8,



30.2. **HRMS** (ESI)  $m/z$ : calculated for  $C_{23}H_{18}ClNNaO_4S_2^+$   $[M+Na]^+$ : 494.0258, found: 494.0254.

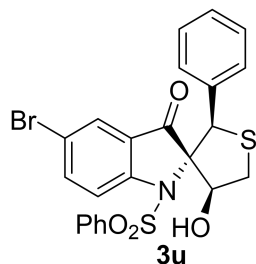

**(2*R*,2'*R*,4'*S*)-5-bromo-4'-hydroxy-2'-phenyl-1-(phenylsulfonyl)-4',5'-dihydro-2'*H*-spiro[indoline-2,3'-thiophen]-3-one (3u)**

Following the general procedure, the reaction was performed with (*Z*)-2-ylideneoxindole **1u** (44.0 mg, 0.10 mmol) and 1,4-dithiane-2,5-diol **2a** (9.1 mg, 0.06 mmol) at room temperature for 4.5 h. The resulting solution was concentrated and directly purified by flash column chromatography (eluted with petroleum ether/ethyl acetate = 5/1, v/v) to afford the desired product **3u** as a white solid in 88% yield (45.3 mg, >20:1 dr, 70% ee). **m. p.**: 77-78 °C.  $[\alpha]_D^{20} = 27.636$  (*c* 0.66,  $CHCl_3$ ). The **enantiomeric excess** was determined by HPLC with an IC-H column (*n*-hexane/*i*-PrOH = 90/10, flow rate 1.0 mL/min,  $\lambda = 254$  nm),  $t_R = 10.166$  min (minor),  $t_R = 12.802$  min (major), 70% ee. **<sup>1</sup>H NMR** (600 MHz,  $DMSO-d_6$ ):  $\delta$  8.22 – 8.17 (m, 2H), 7.78 – 7.73 (m, 1H), 7.68 – 7.61 (m, 3H), 7.48 (d,  $J = 2.2$  Hz, 1H), 7.44 – 7.38 (m, 3H), 7.19 – 7.10 (m, 3H), 6.03 (d,  $J = 4.5$  Hz, 1H), 5.62 (s, 1H), 5.48 (ddd,  $J = 9.6, 7.5, 4.5$  Hz, 1H), 3.67 (t,  $J = 9.6$  Hz, 1H), 3.19 (dd,  $J = 9.5, 7.7$  Hz, 1H). **<sup>13</sup>C NMR** (150 MHz,  $DMSO-d_6$ ):  $\delta$  192.9, 150.5, 139.4, 138.2, 134.6, 134.2, 129.8, 128.7, 128.3, 128.1, 127.6, 125.6, 124.5, 116.1, 115.4, 85.8, 73.9, 48.8, 30.2. **HRMS** (ESI)  $m/z$ : calculated for  $C_{23}H_{18}BrNNaO_4S_2^+$   $[M+Na]^+$ : 537.9753, found: 537.9752.

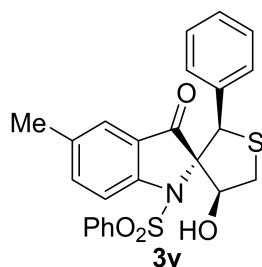

**(2*R*,2'*R*,4'*S*)-4'-hydroxy-5-methyl-2'-phenyl-1-(phenylsulfonyl)-4',5'-dihydro-2'*H*-spiro[indoline-2,3'-thiophen]-3-one (3v)**

Following the general procedure, the reaction was performed with (*Z*)-2-ylideneoxindole **1v** (37.5 mg, 0.10 mmol) and 1,4-dithiane-2,5-diol **2a** (9.1 mg, 0.06 mmol) at room temperature for 1.5 h. The resulting solution was concentrated and directly purified by flash column chromatography (eluted with petroleum ether/ethyl acetate = 5/1, v/v) to afford the desired product **3v** as a white solid in 71% yield (32.0 mg, >20:1 dr, 85% ee). **m. p.**: 77-78 °C.  $[\alpha]_D^{20} = 48.328$  (*c* 0.55, CHCl<sub>3</sub>). The **enantiomeric excess** was determined by HPLC with an IC-H column (*n*-hexane/*i*-PrOH = 90/10, flow rate 1.0 mL/min,  $\lambda = 254$  nm),  $t_R = 17.718$  min (minor),  $t_R = 21.523$  min (major), 85% ee. **<sup>1</sup>H NMR** (400 MHz, DMSO-*d*<sub>6</sub>):  $\delta$  8.22 – 8.15 (m, 2H), 7.77 – 7.69 (m, 1H), 7.66 – 7.58 (m, 2H), 7.47 – 7.40 (m, 2H), 7.31 – 7.27 (m, 2H), 7.18 – 7.08 (m, 4H), 5.91 (d, *J* = 4.6 Hz, 1H), 5.62 (s, 1H), 5.47 (ddd, *J* = 9.7, 7.6, 4.5 Hz, 1H), 3.70 (t, *J* = 9.5 Hz, 1H), 3.16 (dd, *J* = 9.3, 7.7 Hz, 2H), 2.12 (s, 3H). **<sup>13</sup>C NMR** (100 MHz, DMSO-*d*<sub>6</sub>):  $\delta$  194.0, 149.6, 138.7, 137.9, 134.5, 134.2, 132.8, 129.6, 128.8, 128.1, 128.0, 127.6, 122.9, 122.9, 113.7, 85.2, 73.9, 48.7, 30.2, 19.7. **HRMS** (ESI) *m/z*: calculated for C<sub>24</sub>H<sub>21</sub>NNaO<sub>4</sub>S<sub>2</sub><sup>+</sup> [M+Na]<sup>+</sup>: 474.0804, found: 474.0804.

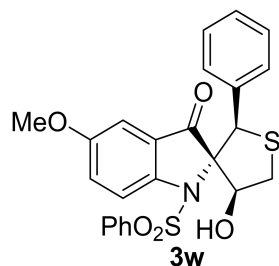

**(2*R*,2'*R*,4'*S*)-4'-hydroxy-5-methoxy-2'-phenyl-1-(phenylsulfonyl)-4',5'-dihydro-2'*H*-spiro[indoline-2,3'-thiophen]-3-one (3w)**

Following the general procedure, the reaction was performed with (*Z*)-2-ylideneoxindole **1w** (39.1 mg, 0.10 mmol) and 1,4-dithiane-2,5-diol **2a** (9.1 mg, 0.06 mmol) at room temperature for 4 h. The resulting solution was concentrated and directly purified by flash column chromatography (eluted with petroleum ether/ethyl acetate = 5/1, v/v) to afford the desired product **3w** as a white solid in 87% yield (40.5

mg, >20:1 dr, 82% ee). **m. p.:** 76 – 77 °C.  $[\alpha]_D^{20} = 50.837$  (*c* 0.28, CHCl<sub>3</sub>). The **enantiomeric excess** was determined by HPLC with an IC-H column (*n*-hexane/*i*-PrOH = 90/10, flow rate 1.0 mL/min,  $\lambda = 254$  nm),  $t_R = 22.434$  min (minor),  $t_R = 30.381$  min (major), 82% ee (recrystallization up to 96% ee). **<sup>1</sup>H NMR** (400 MHz, DMSO-*d*<sub>6</sub>):  $\delta$  8.20 – 8.13 (m, 2H), 7.77 – 7.68 (m, 1H), 7.66 – 7.58 (m, 2H), 7.47 – 7.40 (m, 2H), 7.36 (d, *J*=9.1, 1H), 7.19 – 7.06 (m, 4H), 6.77 (d, *J* = 2.8 Hz, 1H), 5.90 (d, *J* = 4.5 Hz, 1H), 5.63 (s, 1H), 5.46 (ddd, *J* = 9.6, 7.6, 4.6 Hz, 1H), 3.69 (t, *J* = 9.6 Hz, 1H), 3.62 (s, 3H), 3.16 (dd, *J* = 9.4, 7.7 Hz, 1H). **<sup>13</sup>C NMR** (100 MHz, DMSO-*d*<sub>6</sub>):  $\delta$  193.9, 155.3, 145.9, 138.8, 134.5, 134.2, 129.6, 128.8, 128.1, 128.0, 127.5, 125.1, 123.7, 115.1, 104.9, 85.5, 73.9, 55.7, 48.8, 30.2. **HRMS** (ESI) *m/z*: calculated for C<sub>24</sub>H<sub>21</sub>NNaO<sub>5</sub>S<sub>2</sub><sup>+</sup> [M+Na]<sup>+</sup>: 490.0753, found: 490.0749.

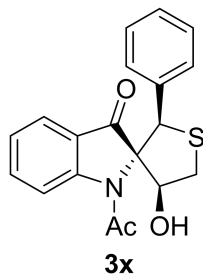

**(2*R*,2'*R*,4'*S*)-1-acetyl-4'-hydroxy-2'-phenyl-4',5'-dihydro-2'*H*-spiro[indoline-2,3'-thiophen]-3-one (3x)**

Following the general procedure, the reaction was performed with (*Z*)-2-ylideneoxindole **1x** (26.3 mg, 0.10 mmol) and 1,4-dithiane-2,5-diol **2a** (9.1 mg, 0.06 mmol) at room temperature for 15 h. The resulting solution was concentrated and directly purified by flash column chromatography (eluted with petroleum ether/ethyl acetate = 8/1, v/v) to afford the desired product **3x** as a white solid in 84% yield (28.5 mg, 11.5:1 dr, 86% ee). **m. p.:** 114-115 °C.  $[\alpha]_D^{20} = 35.158$  (*c* 0.59, CHCl<sub>3</sub>). The **enantiomeric excess** was determined by HPLC with an IC-H column (*n*-hexane/*i*-PrOH = 90/10, flow rate 1.0 mL/min,  $\lambda = 254$  nm),  $t_R = 18.631$  min (major),  $t_R = 23.023$  min (minor), 86% ee. **<sup>1</sup>H NMR** (600 MHz, CDCl<sub>3</sub>):  $\delta$  7.45 (d, *J* = 7.7 Hz, 1H), 7, 7.34 – 7.30 (m, 2H), 7.29 – 7.27 (m, 1H), 7.16 – 7.09 (m, 3H), 6.73 – 6.65 (m, 2H), 5.63 (dd, *J* = 8.9, 7.3 Hz, 1H), 5.00 (s, 1H), 4.90 (s, 1H), 3.64 (dd, *J* = 10.7, 7.3 Hz,

1H), 3.02 (dd,  $J = 10.7, 9.0$  Hz, 1H), 1.89 (s, 3H).  $^{13}\text{C}$  NMR (150 MHz,  $\text{CDCl}_3$ ):  $\delta$  198.5, 169.7, 160.8, 137.4, 133.4, 128.5, 128.3, 128.0, 124.3, 121.8, 119.4, 112.3, 78.4, 77.3, 53.9, 31.8, 20.6. **HRMS** (ESI)  $m/z$ : calculated for  $\text{C}_{19}\text{H}_{17}\text{NNaO}_3\text{S}^+$   $[\text{M}+\text{Na}]^+$ : 362.0821, found: 362.0821.

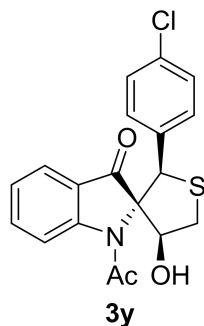

**(2*R*,2'*R*,4'*S*)-1-acetyl-2'-(4-chlorophenyl)-4'-hydroxy-4',5'-dihydro-2'*H*-spiro[indoline-2,3'-thiophen]-3-one (3y)**

Following the general procedure, the reaction was performed with (*Z*)-2-ylideneoxindole **1y** (29.8 mg, 0.10 mmol) and 1,4-dithiane-2,5-diol **2a** (9.1 mg, 0.06 mmol) at room temperature for 9 h. The resulting solution was concentrated and directly purified by flash column chromatography (eluted with petroleum ether/ethyl acetate = 8/1, v/v) to afford the desired product **3y** as a white solid in 82% yield (30.6 mg, 10:1 dr, 88% ee). **m. p.**: 121-122 °C.  $[\alpha]_D^{20} = 31.701$  ( $c$  0.41,  $\text{CHCl}_3$ ). The **enantiomeric excess** was determined by HPLC with an IC-H column (*n*-hexane/*i*-PrOH = 90/10, flow rate 1.0 mL/min,  $\lambda = 254$  nm),  $t_R = 19.308$  min (major),  $t_R = 23.942$  min (minor), 88% ee.  $^1\text{H}$  NMR (600 MHz,  $\text{CDCl}_3$ ):  $\delta$  7.46 (d,  $J = 7.7$  Hz, 1H), 7.36 – 7.30 (m, 1H), 7.30 – 7.26 (m, 2H), 7.14 – 7.09 (m, 2H), 6.76 – 6.70 (m, 2H), 5.61 (dd,  $J = 8.9, 7.4$  Hz, 1H), 4.96 (s, 1H), 4.90 (s, 1H), 3.64 (dd,  $J = 10.8, 7.3$  Hz, 1H), 3.02 (dd,  $J = 10.8, 8.9$  Hz, 1H), 1.87 (s, 3H).  $^{13}\text{C}$  NMR (150 MHz,  $\text{CDCl}_3$ ):  $\delta$  198.2, 169.6, 160.7, 137.7, 134.1, 132.2, 130.0, 128.2, 124.4, 121.6, 119.6, 112.3, 78.3, 77.3, 53.3, 31.9, 20.6. **HRMS** (ESI)  $m/z$ : calculated for  $\text{C}_{19}\text{H}_{16}\text{ClNNaO}_3\text{S}^+$   $[\text{M}+\text{Na}]^+$ : 396.0432, found: 396.0431.

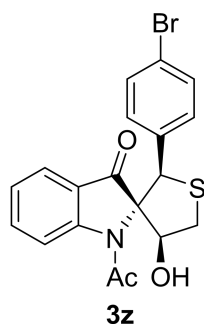

**(2*R*,2'*R*,4'*S*)-1-acetyl-2'-(4-bromophenyl)-4'-hydroxy-4',5'-dihydro-2'*H*-spiro[indoline-2,3'-thiophen]-3-one (3z)**

Following the general procedure, the reaction was performed with (*Z*)-2-ylideneoxindole **1z** (34.2 mg, 0.10 mmol) and 1,4-dithiane-2,5-diol **2a** (9.1 mg, 0.06 mmol) at room temperature for 8 h. The resulting solution was concentrated and directly purified by flash column chromatography (eluted with petroleum ether/ethyl acetate = 8/1, v/v) to afford the desired product **3z** as a white solid in 78% yield (32.5 mg, 12:1 dr, 98% ee). **m. p.:** 118-119 °C.  $[\alpha]_D^{20} = 2.154$  (*c* 0.38, CHCl<sub>3</sub>). The **enantiomeric excess** was determined by HPLC with an IC-H column (*n*-hexane/*i*-PrOH = 90/10, flow rate 1.0 mL/min,  $\lambda = 254$  nm),  $t_R = 11.380$  min (major),  $t_R = 31.827$  min (minor), 98% ee. **<sup>1</sup>H NMR** (600 MHz, CDCl<sub>3</sub>):  $\delta$  7.46 (d, *J* = 7.8 Hz, 1H), 7.36 – 7.31 (m, 1H), 7.29 – 7.25 (m, 2H), 7.23 – 7.19 (m, 2H), 6.77 – 6.69 (m, 2H), 5.60 (dd, *J* = 8.9, 7.3 Hz, 1H), 4.93 (s, 1H), 4.86 (s, 1H), 3.63 (dd, *J* = 10.8, 7.3 Hz, 1H), 3.02 (dd, *J* = 10.9, 8.8 Hz, 1H), 1.87 (s, 3H). **<sup>13</sup>C NMR** (150 MHz, CDCl<sub>3</sub>):  $\delta$  198.2, 169.5, 160.7, 137.8, 132.8, 131.2, 130.4, 124.4, 122.3, 121.6, 119.6, 112.3, 78.3, 77.1, 53.4, 31.9, 20.6. **HRMS** (ESI) *m/z*: calculated for C<sub>19</sub>H<sub>16</sub>BrNNaO<sub>3</sub>S<sup>+</sup> [M+Na]<sup>+</sup>: 439.9926, found: 439.9924.

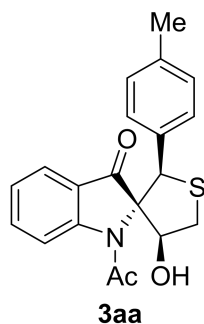

**(2*R*,2'*R*,4'*S*)-1-acetyl-4'-hydroxy-2'-(*p*-tolyl)-4',5'-dihydro-2'*H*-spiro[indoline-2,3'-thiophen]-3-one (3aa)**

Following the general procedure, the reaction was performed with (*Z*)-2-ylideneoxindole **1aa** (27.7 mg, 0.10 mmol) and 1,4-dithiane-2,5-diol **2a** (9.1 mg, 0.06 mmol) at room temperature for 34 h. The resulting solution was concentrated and directly purified by flash column chromatography (eluted with petroleum ether/ethyl acetate = 8/1, v/v) to afford the desired product **3aa** as a white solid in 74% yield (26.0 mg, 15:1 dr, 72% ee). **m. p.**: 78-88 °C.  $[\alpha]_D^{20} = 39.147$  (*c* 0.67, CHCl<sub>3</sub>). The **enantiomeric excess** was determined by HPLC with an IA-H column (*n*-hexane/*i*-PrOH = 80/20, flow rate 1.0 mL/min,  $\lambda = 254$  nm),  $t_R = 8.206$  min (major),  $t_R = 16.548$  min (minor), 72% ee. **<sup>1</sup>H NMR** (600 MHz, CDCl<sub>3</sub>):  $\delta$  7.45 (d, *J* = 7.7 Hz, 1H), 7.33 – 7.26 (m, 1H), 7.21 – 7.17 (m, 2H), 6.97 – 6.91 (m, 2H), 6.74 – 6.67 (m, 2H), 5.61 (dd, *J* = 8.9, 7.2 Hz, 1H), 4.97 (s, 1H), 4.88 (s, 1H), 3.62 (dd, *J* = 10.7, 7.3 Hz, 1H), 3.01 (dd, *J* = 10.7, 8.9 Hz, 1H), 2.19 (s, 3H), 1.88 (s, 3H). **<sup>13</sup>C NMR** (150 MHz, CDCl<sub>3</sub>):  $\delta$  198.6, 169.7, 160.9, 138.1, 137.4, 130.3, 128.8, 128.4, 124.3, 121.9, 119.4, 112.4, 78.5, 77.3, 53.6, 31.8, 21.0, 20.6. **HRMS** (ESI) *m/z*: calculated for C<sub>20</sub>H<sub>19</sub>NNaO<sub>3</sub>S<sup>+</sup> [M+Na]<sup>+</sup>: 376.0978, found: 376.0978.

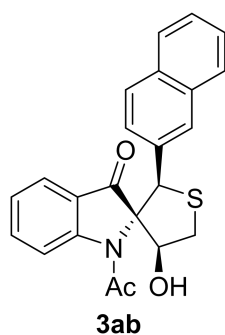

**(2*R*,2'*R*,4'*S*)-1-acetyl-4'-hydroxy-2'-(naphthalen-2-yl)-4',5'-dihydro-2'*H*-spiro[indoline-2,3'-thiophen]-3-one (3ab)**

Following the general procedure, the reaction was performed with (*Z*)-2-ylideneoxindole **1ab** (31.3 mg, 0.10 mmol) and 1,4-dithiane-2,5-diol **2a** (9.1 mg, 0.06 mmol) at room temperature for 34 h. The resulting solution was concentrated and directly purified by flash column chromatography (eluted with petroleum ether/ethyl

acetate = 8/1, v/v) to afford the desired product **3ab** as a white solid in 72% yield (28.0 mg, 16:1 dr, 64% ee). **m. p.:** 115-116 °C.  $[\alpha]_D^{20} = 23.144$  (*c* 0.27, CHCl<sub>3</sub>). The **enantiomeric excess** was determined by HPLC with an IA-H column (*n*-hexane/*i*-PrOH = 80/20, flow rate 1.0 mL/min,  $\lambda = 254$  nm),  $t_R = 10.952$  min (major),  $t_R = 19.273$  min (minor), 64% ee. **<sup>1</sup>H NMR** (600 MHz, CDCl<sub>3</sub>):  $\delta$  7.87 – 7.84 (m, 1H), 7.75 – 7.73 (m, 1H), 7.72 – 7.66 (m, 1H), 7.62 – 7.57 (m, 1H), 7.47 – 7.37 (m, 4H), 7.23 – 7.17 (m, 1H), 6.68 – 6.64 (m, 1H), 6.62 (d, *J* = 8.3 Hz, 1H), 5.67 (dd, *J* = 8.8, 7.1 Hz, 1H), 5.17 (s, 1H), 4.91 (s, 1H), 3.68 (dd, *J* = 10.8, 7.2 Hz, 1H), 3.08 (dd, *J* = 10.8, 8.8 Hz, 1H), 1.89 (s, 3H). **<sup>13</sup>C NMR** (150 MHz, CDCl<sub>3</sub>):  $\delta$  198.6, 169.6, 160.8, 137.5, 133.1, 132.8, 131.3, 128.0, 127.9, 127.7, 127.5, 126.3, 126.2, 126.2, 124.4, 121.7, 119.5, 112.4, 78.6, 77.4, 53.9, 32.0, 20.6. **HRMS** (ESI) *m/z*: calculated for C<sub>23</sub>H<sub>19</sub>NNaO<sub>3</sub>S<sup>+</sup> [M+Na]<sup>+</sup>: 412.0978, found: 412.0977.

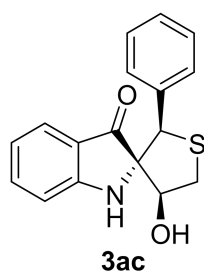

**(2*R*,2'*R*,4'*S*)-4'-hydroxy-2'-phenyl-4',5'-dihydro-2'*H*-spiro[indoline-2,3'-thiophen]-3-one (3ac)**

Following the general procedure, the reaction was performed with (*Z*)-2-ylideneoxindole **1ac** (22.1 mg, 0.10 mmol) and 1,4-dithiane-2,5-diol **2a** (9.1 mg, 0.06 mmol) at room temperature for 20 h. The resulting solution was concentrated and directly purified by flash column chromatography (eluted with petroleum ether/ethyl acetate = 8/1, v/v) to afford the desired product **3ac** as a faint yellow solid in 75% yield (22.3 mg, 2:1 dr, 80% ee (major diastereomer), 81% ee (minor diastereomer)). **m. p.:** 180-181 °C.  $[\alpha]_D^{20} = 98.807$  (*c* 0.28, CHCl<sub>3</sub>). The **enantiomeric excess** was determined by HPLC with an IA-H column (*n*-hexane/*i*-PrOH = 80/20, flow rate 1.0 mL/min,  $\lambda = 254$  nm),  $t_R = 19.425$  min (major),  $t_R = 29.692$  min (minor), 80% ee (major diastereomer). The **enantiomeric excess** was determined by HPLC with an IA-

H column (*n*-hexane/*i*-PrOH = 80/20, flow rate 1.0 mL/min,  $\lambda = 254$  nm),  $t_R = 19.488$  min (major),  $t_R = 54.733$  min (minor), 81% ee (minor diastereomer). **<sup>1</sup>H NMR** (600 MHz, DMSO-*d*<sub>6</sub>):  $\delta$  7.68 (s, 1H), 7.35 – 7.28 (m, 2H), 7.28 – 7.19 (m, 2H), 7.16 – 7.07 (m, 3H), 6.75 (d,  $J = 8.2$  Hz, 1H), 6.49 (t,  $J = 7.4$  Hz, 1H), 5.50 (d,  $J = 6.3$  Hz, 1H), 4.78 (s, 1H), 4.55 – 4.48 (m, 1H), 3.17 (d,  $J = 8.8$  Hz, 2H). **<sup>13</sup>C NMR** (150 MHz, DMSO-*d*<sub>6</sub>):  $\delta$  199.8, 162.1, 137.0, 135.6, 129.0, 127.6, 127.5, 123.2, 120.1, 116.5, 111.8, 78.8, 78.7, 53.6, 34.2. **HRMS** (ESI)  $m/z$ : calculated for C<sub>17</sub>H<sub>15</sub>NNaO<sub>2</sub>S<sup>+</sup> [M+Na]<sup>+</sup>: 320.0716, found: 320.0715.

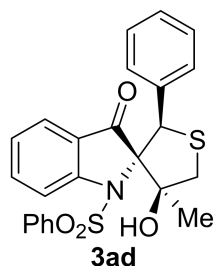

**(2*R*,2'*R*,4'*S*)-4'-hydroxy-4'-methyl-2'-phenyl-1-(phenylsulfonyl)-4',5'-dihydro-2'*H*-spiro[indoline-2,3'-thiophen]-3-one (3ad)**

Following the general procedure, the reaction was performed with (*Z*)-2-ylideneoxindole **1a** (36.1 mg, 0.10 mmol) and 1,4-dithiane-2,5-diol **2b** (10.8 mg, 0.06 mmol) at room temperature for 16 h. The resulting solution was concentrated and directly purified by flash column chromatography (eluted with petroleum ether/ethyl acetate = 5/1, v/v) to afford the desired product **3ad** as a faint yellow solid in 63% yield (28.5 mg, >20:1 dr, 64% ee). **m. p.**: 139-140 °C.  $[\alpha]_D^{20} = 27.713$  (*c* 0.58, CHCl<sub>3</sub>). The **enantiomeric excess** was determined by HPLC with an IA-H column (*n*-hexane/*i*-PrOH = 90/10, flow rate 1.0 mL/min,  $\lambda = 254$  nm),  $t_R = 9.658$  min (major),  $t_R = 10.189$  min (minor), 64% ee. **<sup>1</sup>H NMR** (600 MHz, CDCl<sub>3</sub>):  $\delta$  7.72 (d,  $J = 8.2$  Hz, 1H), 7.50 – 7.46 (m, 2H), 7.46 – 7.41 (m, 2H), 7.42 – 7.38 (m, 1H), 7.37 – 7.31 (m, 3H), 7.30 – 7.21 (m, 4H), 7.12 – 7.08 (m, 1H), 4.58 – 4.53 (m, 2H), 4.14 (s, 1H), 3.96 (s, 1H), 2.27 (s, 3H). **<sup>13</sup>C NMR** (150 MHz, CDCl<sub>3</sub>):  $\delta$  206.7, 141.2, 137.7, 136.4, 133.6, 133.5, 130.8, 128.9, 128.6, 128.5, 128.1, 127.5, 125.6, 123.7, 117.3, 90.6, 82.8,



60.5, 56.5, 30.3. **HRMS** (ESI)  $m/z$ : calculated for  $C_{24}H_{21}NNaO_4S_2^+$   $[M+Na]^+$ : 474.0804, found: 474.0805.

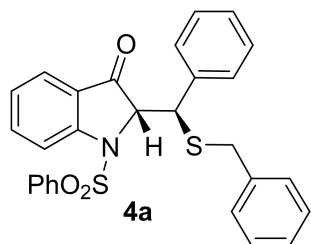

**(R)-2-((R)-(benzylthio)(phenyl)methyl)-1-(phenylsulfonyl)indolin-3-one (4a)**

Following the general procedure, the reaction was performed with (*Z*)-2-ylideneoxindole **1a** (36.1 mg, 0.10 mmol) and thiol **2c** (15.0 mg, 0.12 mmol) at room temperature for 12 h. The resulting solution was concentrated and directly purified by flash column chromatography (eluted with petroleum ether/ethyl acetate = 10/1, v/v) to afford the desired product **4a** as a yellow solid in 95% yield (46.0 mg, 7:1 dr, 63% ee). **m. p.**: 87 – 88 °C.  $[\alpha]_D^{20} = 67.143$  ( $c$  0.44,  $CHCl_3$ ). The **enantiomeric excess** was determined by HPLC with an IC-H column (*n*-hexane/*i*-PrOH = 90/10, flow rate 1.0 mL/min,  $\lambda = 254$  nm),  $t_R = 18.668$  min (minor),  $t_R = 21.237$  min (major), 63% ee. **<sup>1</sup>H NMR** (600 MHz,  $CDCl_3$ ):  $\delta$  7.72 (d,  $J = 8.4$  Hz, 1H), 7.50 – 7.41 (m, 3H), 7.41 – 7.35 (m, 1H), 7.35 – 7.26 (m, 8H), 7.24 – 7.17 (m, 2H), 7.06 – 6.97 (m, 3H), 6.93 (t,  $J = 7.4$  Hz, 1H), 4.68 (d,  $J = 4.6$  Hz, 1H), 4.19 (d,  $J = 4.6$  Hz, 1H), 3.66 (d,  $J = 13.4$  Hz, 1H), 3.58 (d,  $J = 13.3$  Hz, 1H). **<sup>13</sup>C NMR** (150 MHz,  $CDCl_3$ ):  $\delta$  196.0, 152.5, 137.6, 136.9, 136.0, 135.7, 133.9, 129.4, 129.3, 129.1, 128.5, 127.8, 127.7, 127.1, 127.1, 125.6, 124.7, 123.9, 116.7, 69.4, 51.3, 36.9. **HRMS** (ESI)  $m/z$ : calculated for  $C_{28}H_{23}NNaO_3S_2^+$   $[M+Na]^+$ : 508.1012, found: 508.1013.

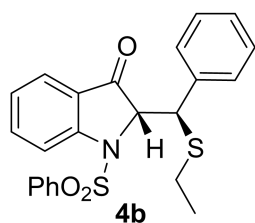

**(R)-2-((R)-(ethylthio)(phenyl)methyl)-1-(phenylsulfonyl)indolin-3-one (4b)**

Following the general procedure, the reaction was performed with (*Z*)-2-ylideneoxindole **1a** (36.1 mg, 0.10 mmol) and thiol **2d** (7.5 mg, 0.12 mmol) at room

temperature for 12 h. The resulting solution was concentrated and directly purified by flash column chromatography (eluted with petroleum ether/ethyl acetate = 10/1, v/v) to afford the desired product **4b** as a yellow solid in 97% yield (41.0 mg, 4:1 dr, 58% ee). **m. p.:** 82 – 83 °C.  $[\alpha]_D^{20} = 89.130$  (*c* 0.32, CHCl<sub>3</sub>). The **enantiomeric excess** was determined by HPLC with an IC-H column (*n*-hexane/*i*-PrOH = 90/10, flow rate 1.0 mL/min,  $\lambda = 254$  nm),  $t_R = 10.850$  min (minor),  $t_R = 14.017$  min (major), 58% ee. **<sup>1</sup>H NMR** (600 MHz, CDCl<sub>3</sub>):  $\delta$  7.81 (d, *J* = 8.4 Hz, 1H), 7.71 – 7.67 (m, 2H), 7.59 – 7.48 (m, 2H), 7.49 – 7.43 (m, 1H), 7.42 – 7.38 (m, 4H), 7.12 – 6.98 (m, 4H), 4.84 (d, *J* = 4.4 Hz, 1H), 4.37 (d, *J* = 4.5 Hz, 1H), 2.59 – 2.50 (m, 2H), 1.27 (t, *J* = 7.4 Hz, 3H). **<sup>13</sup>C NMR** (150 MHz, CDCl<sub>3</sub>):  $\delta$  196.0, 152.4, 136.9, 136.0, 136.0, 134.0, 129.4, 129.2, 127.8, 127.7, 127.1, 125.8, 124.7, 123.9, 116.7, 69.5, 51.7, 26.8, 14.3. **HRMS** (ESI) *m/z*: calculated for C<sub>23</sub>H<sub>21</sub>NNaO<sub>3</sub>S<sub>2</sub><sup>+</sup> [M+Na]<sup>+</sup>: 446.0855, found: 446.0854.

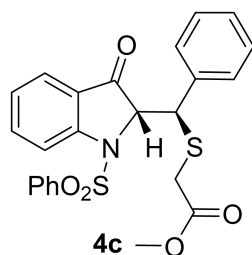

**Methyl 2-(((*R*)-((*R*)-3-oxo-1-(phenylsulfonyl)indolin-2-yl)(phenyl)methyl)thio)acetate (**4c**)**

Following the general procedure, the reaction was performed with (*Z*)-2-ylideneoxindole **1a** (36.1 mg, 0.10 mmol) and thiol **2e** (12.7 mg, 0.12 mmol) at room temperature for 12 h. The resulting solution was concentrated and directly purified by flash column chromatography (eluted with petroleum ether/ethyl acetate = 10/1, v/v) to afford the desired product **4c** as a yellow solid in 97% yield (45.5 mg, 6:1 dr, 14% ee). **m. p.:** 89 – 90 °C.  $[\alpha]_D^{20} = 25.336$  (*c* 0.27, CHCl<sub>3</sub>). The **enantiomeric excess** was determined by HPLC with an IB-H column (*n*-hexane/*i*-PrOH = 90/10, flow rate 0.7 mL/min,  $\lambda = 254$  nm),  $t_R = 19.248$  min (minor),  $t_R = 22.366$  min (major), 14% ee. **<sup>1</sup>H NMR** (600 MHz, CDCl<sub>3</sub>):  $\delta$  7.80 (d, *J* = 8.4 Hz, 1H), 7.76 – 7.71 (m, 2H), 7.57 – 7.53 (m, 1H), 7.49 – 7.36 (m, 6H), 7.13 – 7.06 (m, 3H), 7.04 – 6.99 (m, 1H), 5.04 (d, *J* =

4.7 Hz, 1H), 4.47 (d,  $J = 4.6$  Hz, 1H), 3.70 (s, 3H), 3.28 (d,  $J = 14.9$  Hz, 1H), 3.18 (d,  $J = 14.9$  Hz, 1H).  $^{13}\text{C}$  NMR (150 MHz,  $\text{CDCl}_3$ ):  $\delta$  195.9, 170.4, 152.5, 137.0, 136.0, 134.9, 134.1, 129.4, 129.4, 128.0, 127.9, 127.2, 125.5, 124.7, 123.9, 116.7, 68.9, 52.4, 52.2, 34.0. HRMS (ESI)  $m/z$ : calculated for  $\text{C}_{24}\text{H}_{21}\text{NNaO}_5\text{S}_2^+$   $[\text{M}+\text{Na}]^+$ : 490.0753, found: 490.0750.

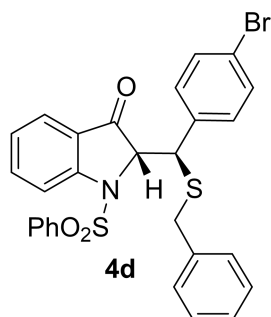

**(*R*)-2-((*R*)-(benzylthio)(4-bromophenyl)methyl)-1-(phenylsulfonyl)indolin-3-one (4d)**

Following the general procedure, the reaction was performed with (*Z*)-2-ylideneoxindole **11** (44.0 mg, 0.10 mmol) and thiol **2c** (15.0 mg, 0.12 mmol) at room temperature for 12 h. The resulting solution was concentrated and directly purified by flash column chromatography (eluted with petroleum ether/ethyl acetate = 10/1, v/v) to afford the desired product **4d** as a yellow solid in 98% yield (55.3 mg, 8:1 dr, 84% ee). **m. p.**: 49 – 50 °C.  $[\alpha]_D^{20} = 68.546$  ( $c$  0.54,  $\text{CHCl}_3$ ). The **enantiomeric excess** was determined by HPLC with an IA-H column ( $n$ -hexane/*i*-PrOH = 80/20, flow rate 0.7 mL/min,  $\lambda = 254$  nm),  $t_R = 20.161$  min (minor),  $t_R = 30.441$  min (major), 84% ee.  $^1\text{H}$  NMR (600 MHz,  $\text{CDCl}_3$ ):  $\delta$  7.81 (d,  $J = 8.4$  Hz, 1H), 7.56 – 7.45 (m, 4H), 7.41 – 7.21 (m, 12H), 7.02 (t,  $J = 7.5$  Hz, 1H), 4.71 (d,  $J = 4.6$  Hz, 1H), 4.23 (d,  $J = 4.6$  Hz, 1H), 3.71 (d,  $J = 13.4$  Hz, 1H), 3.61 (d,  $J = 13.4$  Hz, 1H).  $^{13}\text{C}$  NMR (150 MHz,  $\text{CDCl}_3$ ):  $\delta$  195.6, 152.4, 137.2, 137.2, 135.6, 135.0, 134.0, 131.0, 130.9, 129.3, 129.0, 128.4, 127.1, 127.0, 125.2, 124.8, 123.9, 121.7, 116.6, 69.2, 50.3, 36.9. HRMS (ESI)  $m/z$ : calculated for  $\text{C}_{28}\text{H}_{22}\text{BrNNaO}_3\text{S}_2^+$   $[\text{M}+\text{Na}]^+$ : 586.0117, found: 586.0117.

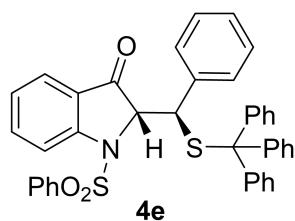

**(R)-2-((R)-phenyl(tritylthio)methyl)-1-(phenylsulfonyl)indolin-3-one (4e)**

Following the general procedure, the reaction was performed with (*Z*)-2-ylideneoxindole **1a** (36.1 mg, 0.10 mmol) and thiol **2f** (33.2 mg, 0.12 mmol) at room temperature for 12 h. The resulting solution was concentrated and directly purified by flash column chromatography (eluted with petroleum ether/ethyl acetate = 10/1, v/v) to afford the desired product **4e** as a yellow solid in 63% yield (40.2 mg, 12.5:1 dr, 63% ee). **m. p.**: 99 – 100 °C.  $[\alpha]_D^{20} = 31.560$  (*c* 1.09, CHCl<sub>3</sub>). The **enantiomeric excess** was determined by HPLC with an IA-H column (*n*-hexane/*i*-PrOH = 90/10, flow rate 1.0 mL/min,  $\lambda = 254$  nm),  $t_R = 8.936$  min (major),  $t_R = 10.447$  min (minor), 63% ee. **<sup>1</sup>H NMR** (600 MHz, CDCl<sub>3</sub>):  $\delta$  7.66 (d, *J* = 8.7 Hz, 1H), 7.62 – 7.54 (m, 3H), 7.46 – 7.40 (m, 8H), 7.39 – 7.35 (m, 2H), 7.22 – 7.12 (m, 9H), 6.98 – 6.92 (m, 1H), 6.88 – 6.77 (m, 5H), 4.46 – 4.43 (m, 2H). **<sup>13</sup>C NMR** (150 MHz, CDCl<sub>3</sub>):  $\delta$  196.7, 152.4, 144.3, 136.8, 136.5, 136.5, 133.9, 130.0, 129.4, 129.3, 127.7, 127.1, 127.0, 126.7, 126.6, 125.8, 124.4, 123.8, 116.4, 69.7, 69.3, 50.9. **HRMS** (ESI) *m/z*: calculated for C<sub>40</sub>H<sub>31</sub>NNaO<sub>3</sub>S<sub>2</sub><sup>+</sup> [M+Na]<sup>+</sup>: 660.1638, found: 660.1633.

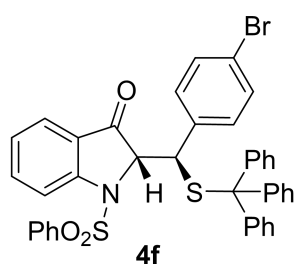

**(R)-2-((R)-(4-bromophenyl)(tritylthio)methyl)-1-(phenylsulfonyl)indolin-3-one**

**(4f)**

Following the general procedure, the reaction was performed with (*Z*)-2-ylideneoxindole **11** (44.0 mg, 0.10 mmol) and thiol **2f** (33.2 mg, 0.12 mmol) at room temperature for 12 h. The resulting solution was concentrated and directly purified by

flash column chromatography (eluted with petroleum ether/ethyl acetate = 10/1, v/v) to afford the desired product **4f** as a yellow solid in 65% yield (46.6 mg, 15:1 dr, 86% ee). **m. p.**: 112 – 113 °C.  $[\alpha]_D^{20} = 8.136$  (*c* 4.82, CHCl<sub>3</sub>). The **enantiomeric excess** was determined by HPLC with an IA-H column (*n*-hexane/*i*-PrOH = 90/10, flow rate 1.0 mL/min,  $\lambda = 254$  nm),  $t_R = 8.729$  min (major),  $t_R = 10.331$  min (minor), 86% ee (recrystallization up to 96% ee). **<sup>1</sup>H NMR** (600 MHz, CDCl<sub>3</sub>):  $\delta$  7.73 (d, *J* = 8.5 Hz, 1H), 7.70 – 7.64 (m, 2H), 7.62 – 7.56 (m, 1H), 7.50 – 7.36 (m, 10H), 7.24 – 7.13 (m, 9H), 7.02 – 6.90 (m, 3H), 6.75 – 6.71 (m, 2H), 4.58 – 4.54 (m, 1H), 4.48 – 4.44 (m, 1H). **<sup>13</sup>C NMR** (150 MHz, CDCl<sub>3</sub>):  $\delta$  196.4, 152.4, 144.0, 137.2, 136.2, 135.8, 134.0, 131.1, 130.0, 129.9, 129.4, 127.7, 127.1, 126.8, 125.4, 124.7, 123.9, 120.6, 116.4, 69.6, 69.2, 50.0. **HRMS** (ESI) *m/z*: calculated for C<sub>40</sub>H<sub>30</sub>BrNNaO<sub>3</sub>S<sub>2</sub><sup>+</sup> [M+Na]<sup>+</sup>: 738.0743, found: 738.0740.

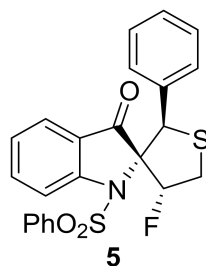

**(2*S*,2'*R*,4'*R*)-4'-fluoro-2'-phenyl-1-(phenylsulfonyl)-4',5'-dihydro-2'*H*-spiro[indoline-2,3'-thiophen]-3-one (5)**

White solid; reaction time: 0.5 h; 78% yield (34.2 mg), >20:1 dr. **m. p.**: 176 – 177 °C.  $[\alpha]_D^{20} = 76.654$  (*c* 0.65, CHCl<sub>3</sub>). The **enantiomeric excess** was determined by HPLC with an IA-H column (*n*-hexane/*i*-PrOH = 80/20, flow rate 1.0 mL/min,  $\lambda = 254$  nm),  $t_R = 8.040$  min (major),  $t_R = 11.746$  min (minor), 96% ee. **<sup>1</sup>H NMR** (400 MHz, CDCl<sub>3</sub>):  $\delta$  8.06 – 7.98 (m, 2H), 7.66 – 7.45 (m, 6H), 7.41 – 7.30 (m, 2H), 7.17 – 7.02 (m, 3H), 6.93 – 6.84 (m, 1H), 6.39 (ddd, *J* = 53.1, 9.2, 8.1 Hz, 1H), 5.70 (d, *J* = 1.5 Hz, 1H), 4.14 (dt, *J* = 15.8, 9.5 Hz, 1H), 3.31 (dd, *J* = 9.7, 8.1 Hz, 1H). **<sup>13</sup>C NMR** (100 MHz, CDCl<sub>3</sub>):  $\delta$  192.1, 151.7, 139.4, 136.9, 133.9, 133.0, 129.5, 129.1, 128.4, 128.0, (127.1, 127.0), 124.1, 123.4, 122.9, 114.1, (92.2, 90.3), (83.0, 82.7), (48.9, 48.8), (27.7, 27.5). **<sup>19</sup>F NMR** (376 MHz, CDCl<sub>3</sub>):  $\delta$  -186.5. **HRMS** (ESI) *m/z*:

calculated for  $C_{23}H_{19}FNO_3S_2^+$   $[M+H]^+$ : 440.0785, found: 440.0785.

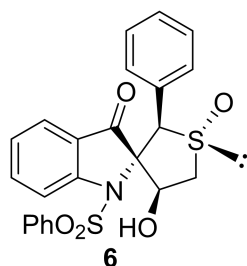

**(1'*R*,2*R*,2'*R*,4'*S*)-4'-hydroxy-2'-phenyl-1-(phenylsulfonyl)-4',5'-dihydro-2'*H*-spiro[indoline-2,3'-thiophen]-3-one 1'-oxide (6)**

White solid; reaction time: 10 min; 96% yield (43.5 mg), >20:1 dr. **m. p.**: 97 – 98 °C.  $[\alpha]_D^{20} = 54.644$  (*c* 0.72,  $CHCl_3$ ). The **enantiomeric excess** was determined by HPLC with an IC-H column (*n*-hexane/*i*-PrOH = 80/20, flow rate 1.0 mL/min,  $\lambda = 254$  nm),  $t_R = 28.757$  min (major),  $t_R = 61.545$  min (minor), 96% ee. **<sup>1</sup>H NMR** (600 MHz,  $DMSO-d_6$ ):  $\delta$  8.17 – 8.13 (m, 2H), 7.76 – 7.70 (m, 1H), 7.64 – 7.53 (m, 4H), 7.48 (d,  $J = 8.5$  Hz, 1H), 7.34 – 7.22 (m, 5H), 7.09 (t,  $J = 7.5$  Hz, 1H), 6.12 (d,  $J = 4.6$  Hz, 1H), 5.89 (td,  $J = 9.2, 4.6$  Hz, 1H), 5.01 (s, 1H), 3.80 (dd,  $J = 13.7, 9.3$  Hz, 1H), 3.24 (dd,  $J = 13.7, 9.2$  Hz, 1H). **<sup>13</sup>C NMR** (150 MHz,  $DMSO-d_6$ ):  $\delta$  197.2, 152.6, 138.4, 138.2, 134.5, 130.5, 129.8, 129.1, 128.9, 128.8, 127.5, 124.0, 123.9, 122.3, 114.3, 84.1, 74.5, 71.1, 53.0. **HRMS** (ESI) *m/z*: calculated for  $C_{23}H_{19}NNaO_5S_2^+$   $[M+Na]^+$ : 476.0597, found: 476.0591.

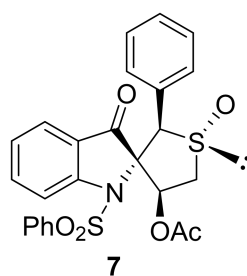

**(1'*R*,2*R*,2'*R*,4'*S*)-1'-oxido-3-oxo-2'-phenyl-1-(phenylsulfonyl)-4',5'-dihydro-2'*H*-spiro[indoline-2,3'-thiophen]-4'-yl acetate (7)**

White solid; reaction time: 0.5 h; 97% yield (48.0 mg), >20:1 dr. **m. p.**: 257 – 258 °C.  $[\alpha]_D^{20} = 85.816$  (*c* 1.41,  $CHCl_3$ ). The **enantiomeric excess** was determined by HPLC with an IA-H column (*n*-hexane/*i*-PrOH = 80/20, flow rate 1.0 mL/min,  $\lambda = 254$  nm),  $t_R = 32.003$  min (major),  $t_R = 47.945$  min (minor), 99% ee. **<sup>1</sup>H NMR** (600 MHz,

CDCl<sub>3</sub>):  $\delta$  7.96 – 7.90 (m, 3H), 7.64 – 7.52 (m, 3H), 7.51 – 7.41 (m, 4H), 7.24 – 7.15 (m, 3H), 7.07 (t,  $J$  = 7.5 Hz, 1H), 6.40 (t,  $J$  = 9.1 Hz, 1H), 5.23 (s, 1H), 3.78 (dd,  $J$  = 13.9, 8.7 Hz, 1H), 3.59 (dd,  $J$  = 13.9, 9.5 Hz, 1H), 1.35 (s, 3H). <sup>13</sup>C NMR (150 MHz, CDCl<sub>3</sub>):  $\delta$  196.1, 168.8, 153.5, 139.9, 138.4, 134.0, 129.6, 129.6, 129.0, 128.8, 128.7, 126.4, 124.5, 124.0, 122.5, 114.9, 80.8, 74.1, 72.1, 51.8, 19.8. HRMS (ESI)  $m/z$ : calculated for C<sub>25</sub>H<sub>22</sub>NO<sub>6</sub>S<sub>2</sub><sup>+</sup> [M+H]<sup>+</sup>: 496.0883, found: 496.0880.

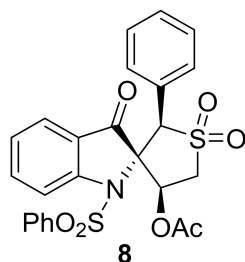

**(2R,2'R,4'S)-1',1'-dioxido-3-oxo-2'-phenyl-1-(phenylsulfonyl)-4',5'-dihydro-2'H-spiro[indoline-2,3'-thiophen]-4'-yl acetate (8)**

White solid; reaction time: 3 h; 94% yield (24.0 mg), >20:1 dr. **m. p.:** 222 – 223 °C.  $[\alpha]_D^{20}$  = 35.303 ( $c$  1.32, CHCl<sub>3</sub>). The **enantiomeric excess** was determined by HPLC with an IA-H column ( $n$ -hexane/ $i$ -PrOH = 80/20, flow rate 1.0 mL/min,  $\lambda$  = 254 nm),  $t_R$  = 45.516 min (major),  $t_R$  = 85.345 min (minor), 99% ee. <sup>1</sup>H NMR (600 MHz, CDCl<sub>3</sub>):  $\delta$  7.95 – 7.89 (m, 3H), 7.67 – 7.54 (m, 3H), 7.53 – 7.43 (m, 4H), 7.25 – 7.16 (m, 3H), 7.09 (t,  $J$  = 7.5 Hz, 1H), 6.15 (dd,  $J$  = 10.3, 8.4 Hz, 1H), 5.73 (s, 1H), 4.25 (dd,  $J$  = 12.4, 8.2 Hz, 1H), 4.18 (dd,  $J$  = 12.6, 10.3 Hz, 1H), 1.41 (s, 3H). <sup>13</sup>C NMR (150 MHz, CDCl<sub>3</sub>):  $\delta$  193.5, 168.9, 152.9, 140.0, 138.1, 134.1, 131.2, 129.7, 129.7, 128.6, 126.3, 124.9, 124.7, 124.3, 122.6, 114.8, 78.6, 70.8, 68.1, 54.4, 19.8. HRMS (ESI)  $m/z$ : calculated for C<sub>25</sub>H<sub>22</sub>NO<sub>7</sub>S<sub>2</sub><sup>+</sup> [M+H]<sup>+</sup>: 512.0832, found: 512.0831.

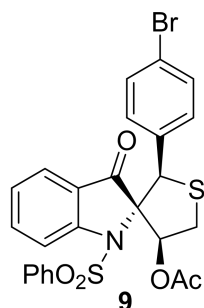

**(2*R*,2'*R*,4'*S*)-2'-(4-bromophenyl)-3-oxo-1-(phenylsulfonyl)-4',5'-dihydro-2'*H*-spiro[indoline-2,3'-thiophen]-4'-yl acetate (9)**

White solid; reaction time: 0.5 h; 98% yield (33.0 mg), >20:1 dr. **m. p.:** 234 – 235 °C.  $[\alpha]_D^{20} = 67.673$  (c 0.65, CHCl<sub>3</sub>). The **enantiomeric excess** was determined by HPLC with an IA-H column (*n*-hexane/*i*-PrOH = 90/10, flow rate 1.0 mL/min,  $\lambda = 254$  nm),  $t_R = 15.735$  min (major),  $t_R = 22.279$  min (minor), 99% ee. **<sup>1</sup>H NMR** (600 MHz, CDCl<sub>3</sub>):  $\delta$  7.99 – 7.91 (m, 3H), 7.64 – 7.58 (m, 1H), 7.58 – 7.52 (m, 1H), 7.52 – 7.46 (m, 2H), 7.43 – 7.37 (m, 3H), 7.24 – 7.20 (m, 2H), 7.04 – 6.99 (m, 1H), 6.06 (dd,  $J = 9.1, 7.8$  Hz, 1H), 5.74 (s, 1H), 3.66 – 3.60 (m, 1H), 3.55 (dd,  $J = 9.8, 7.9$  Hz, 1H), 1.34 (s, 3H). **<sup>13</sup>C NMR** (150 MHz, CDCl<sub>3</sub>):  $\delta$  192.8, 169.4, 152.1, 140.2, 137.3, 133.8, 132.4, 131.2, 130.8, 129.5, 126.4, 124.3, 123.8, 123.1, 122.4, 114.6, 82.0, 74.8, 48.4, 27.7, 20.1. **HRMS** (ESI)  $m/z$ : calculated for C<sub>25</sub>H<sub>20</sub>BrNNaO<sub>5</sub>S<sub>2</sub><sup>+</sup> [M+Na]<sup>+</sup>: 579.9858, found: 579.9849.

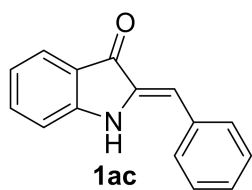

**(*Z*)-2-benzylideneindolin-3-one (1ac)**

Brown solid; Reaction time: 1 h; Yield: 84% (18.6 mg); **m. p.:** 174–175 °C; **<sup>1</sup>H NMR** (400 MHz, DMSO-*d*<sub>6</sub>):  $\delta$  9.80 (s, 1H), 7.77 – 7.70 (m, 2H), 7.61 – 7.45 (m, 4H), 7.41 – 7.33 (m, 1H), 7.14 (d,  $J = 8.1$  Hz, 1H), 6.96 – 6.88 (m, 1H), 6.64 (s, 1H). **<sup>13</sup>C NMR** (100 MHz, DMSO-*d*<sub>6</sub>):  $\delta$  186.4, 154.2, 136.4, 134.4, 134.2, 129.9, 129.0, 128.4, 124.1, 120.0, 119.8, 112.6, 109.8. **HRMS** (ESI)  $m/z$ : calculated for C<sub>15</sub>H<sub>12</sub>NO<sup>+</sup> [M+H]<sup>+</sup>: 222.0913, found: 222.0917.



## 11. X-ray crystallographic data of products *rac-3k*, 4f, 7 and 9

The single crystals of compound *rac-3k* for X-ray analysis was grown from the mixed solution of hexane and acetone ( $v/v = 3/1$ ). A suitable crystal was selected and X-ray on a Super Nova, Dual, Cu at zero, Atlas S2 diffractometer. The crystal was kept at 273.00(10) K during data collection, and the thermal ellipsoid was drawn at the 50% probability level.

Compound *rac-3k*:

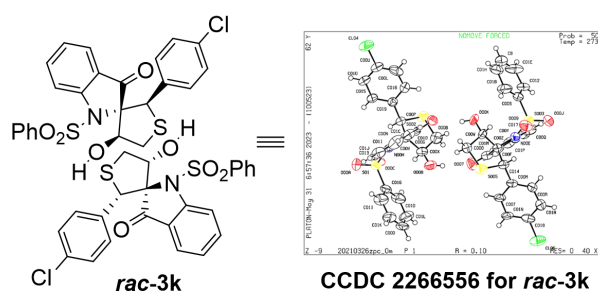

**Table S3 Crystal data and structure refinement for *rac-3k*.**

|                        |                                                       |                                 |
|------------------------|-------------------------------------------------------|---------------------------------|
| Bond precision:        | C-C = 0.0226 Å                                        | Wavelength=1.54178              |
| Cell:                  | a=8.968(4)      b=10.282(5)      c=12.508(6)          |                                 |
|                        | alpha=66.07(2)      beta=86.01(2)      gamma=84.86(2) |                                 |
| Temperature:           | 273 K                                                 |                                 |
|                        | Calculated                                            | Reported                        |
| Volume                 | 1049.3(9)                                             | 1049.2(8)                       |
| Space group            | P 1                                                   | P 1                             |
| Hall group             | P 1                                                   | P 1                             |
| Moiety formula         | C23 H18 Cl N O4 S2                                    | 0.25(C23 H18 Cl N O4 S2)        |
| Sum formula            | C23 H18 Cl N O4 S2                                    | C2 H2 Cl2 N2 O2 S2              |
| Mr                     | 471.95                                                | 221.08                          |
| Dx, g cm <sup>-3</sup> | 1.494                                                 | 2.799                           |
| Z                      | 2                                                     | 8                               |
| Mu (mm <sup>-1</sup> ) | 3.745                                                 | 17.960                          |
| F000                   | 488.0                                                 | 880.0                           |
| F000'                  | 491.31                                                |                                 |
| h, k, lmax             | 11, 13, 16                                            | 11, 12, 16                      |
| Nref                   | 9420[ 4710]                                           | 7572                            |
| Tmin, Tmax             |                                                       |                                 |
| Tmin'                  |                                                       |                                 |
| Correction method=     | Not given                                             |                                 |
| Data completeness=     | 1.61/0.80                                             | Theta(max)= 83.755              |
| R(reflections)=        | 0.1021( 5651)                                         | wR2(reflections)= 0.2650( 7572) |
| S =                    | 1.679                                                 | Npar= 561                       |

## Compound 4f:

The single crystals of compound **4f** for X-ray analysis was grown from the mixed solution of dichloromethane and methanol ( $v/v = 3/1$ ). Single crystals of compound **4f** were X-ray. A suitable crystal was selected and X-ray on a XtaLAB AFC12 (RINC): Kappa single diffractometer. The crystal was kept at 150.00(10) K during data collection. Using Olex2, the structure was solved with the SHELXS structure solution program using Direct Methods and refined with the SHELXL refinement package using Least Squares minimization. The thermal ellipsoid was drawn at the 50% probability level.

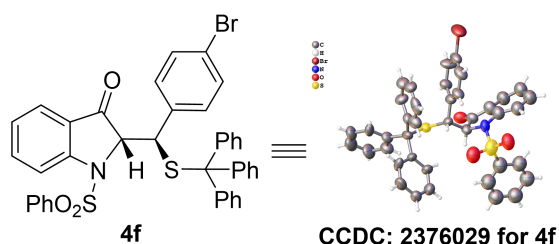

**Table S4 Crystal data and structure refinement 4f.**

|                                             |                                                                  |
|---------------------------------------------|------------------------------------------------------------------|
| Identification code                         | <b>4f</b>                                                        |
| Empirical formula                           | C <sub>40</sub> H <sub>30</sub> BrNO <sub>3</sub> S <sub>2</sub> |
| Formula weight                              | 716.68                                                           |
| Temperature/K                               | 150                                                              |
| Crystal system                              | triclinic                                                        |
| Space group                                 | P1                                                               |
| a/Å                                         | 10.0638(3)                                                       |
| b/Å                                         | 10.0887(3)                                                       |
| c/Å                                         | 21.2206(10)                                                      |
| $\alpha$ /°                                 | 77.031(3)                                                        |
| $\beta$ /°                                  | 86.622(3)                                                        |
| $\gamma$ /°                                 | 66.577(3)                                                        |
| Volume/Å <sup>3</sup>                       | 1925.46(13)                                                      |
| Z                                           | 2                                                                |
| $\rho_{\text{calc}}/\text{cm}^3$            | 1.236                                                            |
| $\mu/\text{mm}^{-1}$                        | 2.746                                                            |
| F(000)                                      | 736.0                                                            |
| Crystal size/mm <sup>3</sup>                | 0.58 × 0.47 × 0.33                                               |
| Radiation                                   | CuK $\alpha$ ( $\lambda = 1.54184$ )                             |
| 2 $\theta$ range for data collection/°      | 4.276 to 133.198                                                 |
| Index ranges                                | -11 ≤ h ≤ 7, -12 ≤ k ≤ 11, -25 ≤ l ≤ 25                          |
| Reflections collected                       | 18043                                                            |
| Independent reflections                     | 8785 [R <sub>int</sub> = 0.0478, R <sub>sigma</sub> = 0.0603]    |
| Data/restraints/parameters                  | 8785/662/907                                                     |
| Goodness-of-fit on F <sup>2</sup>           | 1.487                                                            |
| Final R indexes [I ≥ 2 $\sigma$ (I)]        | R <sub>1</sub> = 0.1140, wR <sub>2</sub> = 0.3387                |
| Final R indexes [all data]                  | R <sub>1</sub> = 0.1220, wR <sub>2</sub> = 0.3527                |
| Largest diff. peak/hole / e Å <sup>-3</sup> | 1.30/-0.58                                                       |
| Flack parameter                             | 0.13(5)                                                          |

## Compound 7:

The single crystals of compound **7** for X-ray analysis was grown from the mixed solution of hexane and chloroform ( $v/v = 3/1$ ). Single crystals of compound **7** were X-ray. A suitable crystal was selected and X-ray on a XtaLAB AFC12 (RINC): Kappa single diffractometer. The crystal was kept at 150.00(10) K during data collection. Using Olex2, the structure was solved with the SHELXS structure solution program using Direct Methods and refined with the SHELXL refinement package using Least Squares minimization. The thermal ellipsoid was drawn at the 50% probability level.

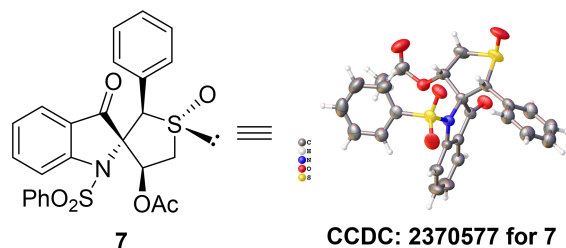

**Table S5 Crystal data and structure refinement for 7.**

|                                             |                                                                |
|---------------------------------------------|----------------------------------------------------------------|
| Identification code                         | 7                                                              |
| Empirical formula                           | C <sub>25</sub> H <sub>21</sub> NO <sub>6</sub> S <sub>2</sub> |
| Formula weight                              | 495.55                                                         |
| Temperature/K                               | 150                                                            |
| Crystal system                              | orthorhombic                                                   |
| Space group                                 | P2 <sub>1</sub> 2 <sub>1</sub> 2 <sub>1</sub>                  |
| a/Å                                         | 9.53006(13)                                                    |
| b/Å                                         | 14.5860(2)                                                     |
| c/Å                                         | 16.7204(2)                                                     |
| $\alpha$ /°                                 | 90                                                             |
| $\beta$ /°                                  | 90                                                             |
| $\gamma$ /°                                 | 90                                                             |
| Volume/Å <sup>3</sup>                       | 2324.24(6)                                                     |
| Z                                           | 4                                                              |
| $\rho_{\text{calc}}$ /cm <sup>3</sup>       | 1.416                                                          |
| $\mu$ /mm <sup>-1</sup>                     | 2.444                                                          |
| F(000)                                      | 1032.0                                                         |
| Crystal size/mm <sup>3</sup>                | 0.44 × 0.36 × 0.25                                             |
| Radiation                                   | Cu K $\alpha$ ( $\lambda = 1.54184$ )                          |
| 2 $\theta$ range for data collection/°      | 8.044 to 136.084                                               |
| Index ranges                                | -11 ≤ h ≤ 11, -17 ≤ k ≤ 17, -19 ≤ l ≤ 20                       |
| Reflections collected                       | 9405                                                           |
| Independent reflections                     | 4067 [R <sub>int</sub> = 0.0790, R <sub>sigma</sub> = 0.0755]  |
| Data/restraints/parameters                  | 4067/0/309                                                     |
| Goodness-of-fit on F <sup>2</sup>           | 1.044                                                          |
| Final R indexes [I ≥ 2 $\sigma$ (I)]        | R <sub>1</sub> = 0.0729, wR <sub>2</sub> = 0.1972              |
| Final R indexes [all data]                  | R <sub>1</sub> = 0.0774, wR <sub>2</sub> = 0.2051              |
| Largest diff. peak/hole / e Å <sup>-3</sup> | 0.62/-0.52                                                     |
| Flack parameter                             | 0.01(3)                                                        |

## Compound 9:

The single crystals of compound **9** for X-ray analysis was grown from the mixed solution of hexane and chloroform (V/V = 10/1). Single crystals of compound **9** were X-ray. A suitable crystal was selected and X-ray on a XtaLAB AFC12 (RINC): Kappa single diffractometer. The crystal was kept at 150.00(10) K during data collection. Using Olex2, the structure was solved with the SHELXS structure solution program using Direct Methods and refined with the SHELXL refinement package using Least Squares minimization. The thermal ellipsoid was drawn at the 50% probability level.

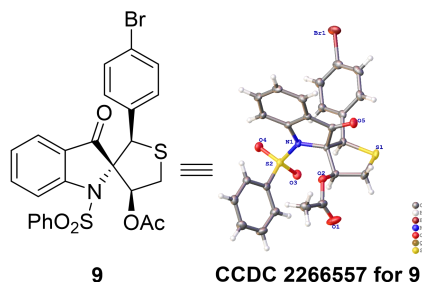

**Table S6 Crystal data and structure refinement for 9.**

|                                             |                                                                  |
|---------------------------------------------|------------------------------------------------------------------|
| Identification code                         | 9                                                                |
| Empirical formula                           | C <sub>25</sub> H <sub>20</sub> BrNO <sub>5</sub> S <sub>2</sub> |
| Formula weight                              | 558.45                                                           |
| Temperature/K                               | 150.00(10)                                                       |
| Crystal system                              | orthorhombic                                                     |
| Space group                                 | P2 <sub>1</sub> 2 <sub>1</sub> 2 <sub>1</sub>                    |
| a/Å                                         | 9.25447(8)                                                       |
| b/Å                                         | 13.91114(12)                                                     |
| c/Å                                         | 17.92573(13)                                                     |
| α/°                                         | 90                                                               |
| β/°                                         | 90                                                               |
| γ/°                                         | 90                                                               |
| Volume/Å <sup>3</sup>                       | 2307.76(3)                                                       |
| Z                                           | 4                                                                |
| ρ <sub>calc</sub> /cm <sup>3</sup>          | 1.607                                                            |
| μ/mm <sup>-1</sup>                          | 4.453                                                            |
| F(000)                                      | 1136.0                                                           |
| Crystal size/mm <sup>3</sup>                | 0.16 × 0.13 × 0.11                                               |
| Radiation                                   | Cu Kα (λ = 1.54184)                                              |
| 2θ range for data collection/°              | 8.044 to 144.008                                                 |
| Index ranges                                | -10 ≤ h ≤ 11, -14 ≤ k ≤ 16, -21 ≤ l ≤ 21                         |
| Reflections collected                       | 10959                                                            |
| Independent reflections                     | 4423 [R <sub>int</sub> = 0.0198, R <sub>sigma</sub> = 0.0204]    |
| Data/restraints/parameters                  | 4423/0/309                                                       |
| Goodness-of-fit on F <sup>2</sup>           | 1.062                                                            |
| Final R indexes [I ≥ 2σ (I)]                | R <sub>1</sub> = 0.0249, wR <sub>2</sub> = 0.0658                |
| Final R indexes [all data]                  | R <sub>1</sub> = 0.0250, wR <sub>2</sub> = 0.0659                |
| Largest diff. peak/hole / e Å <sup>-3</sup> | 0.82/-0.41                                                       |
| Flack/Hooft parameter                       | 0.001(5)/0.001(5)                                                |

## 12. NMR spectra

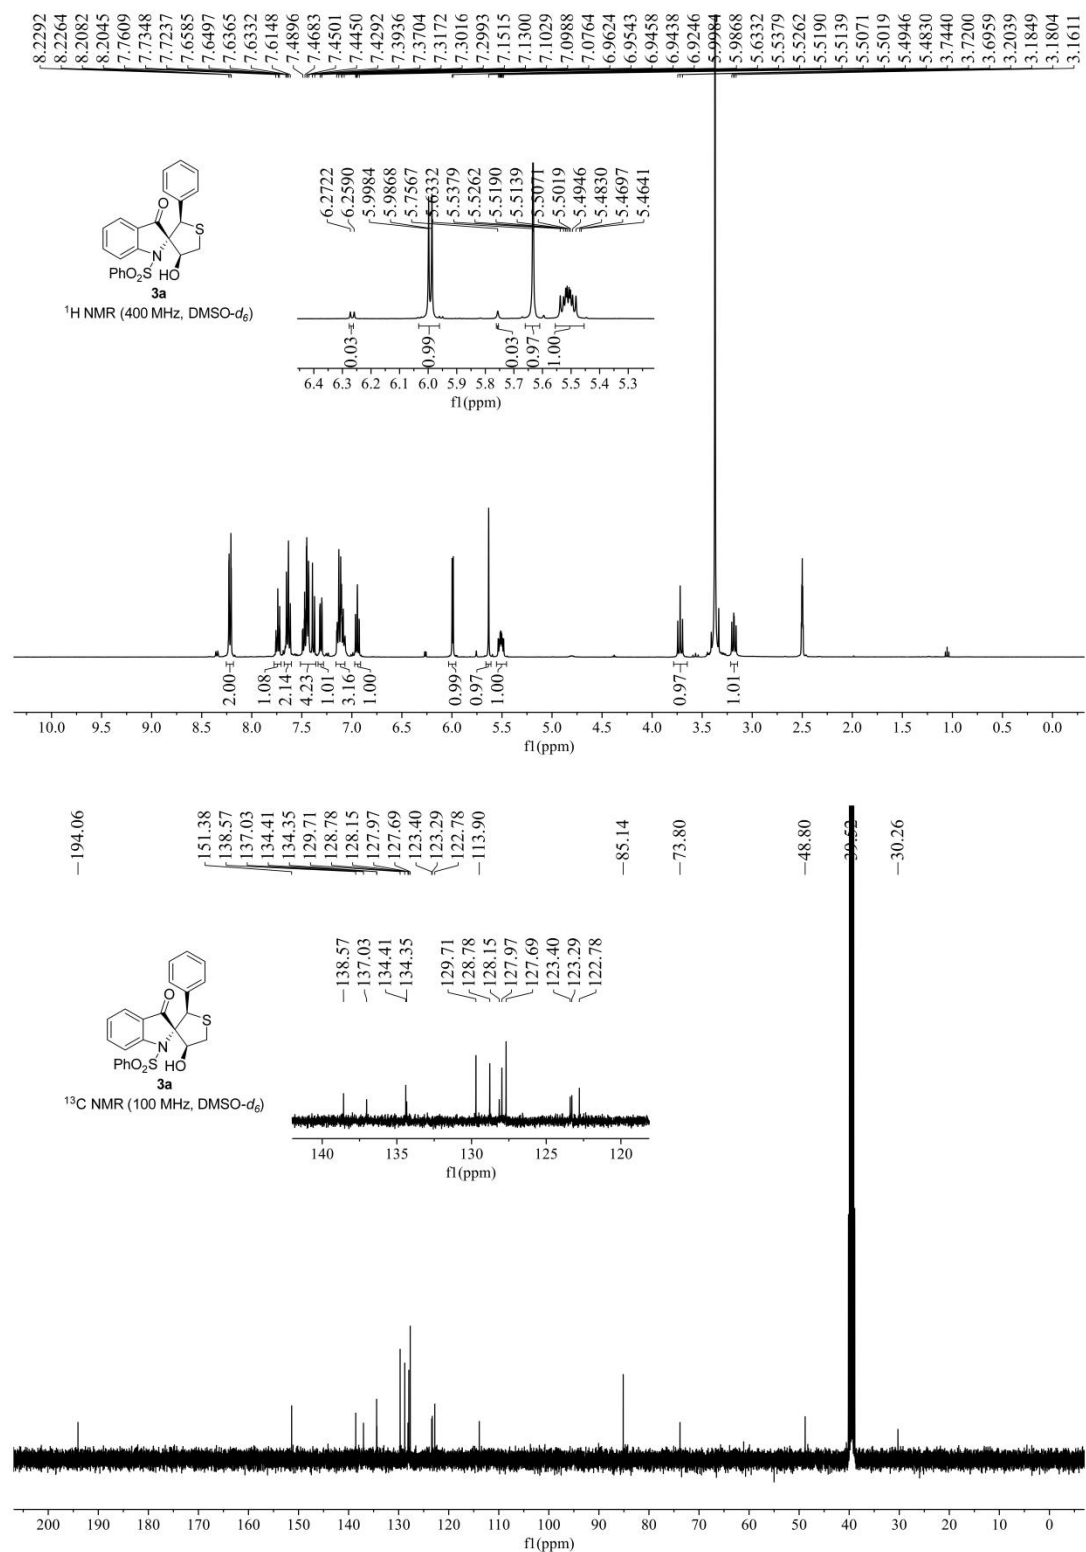

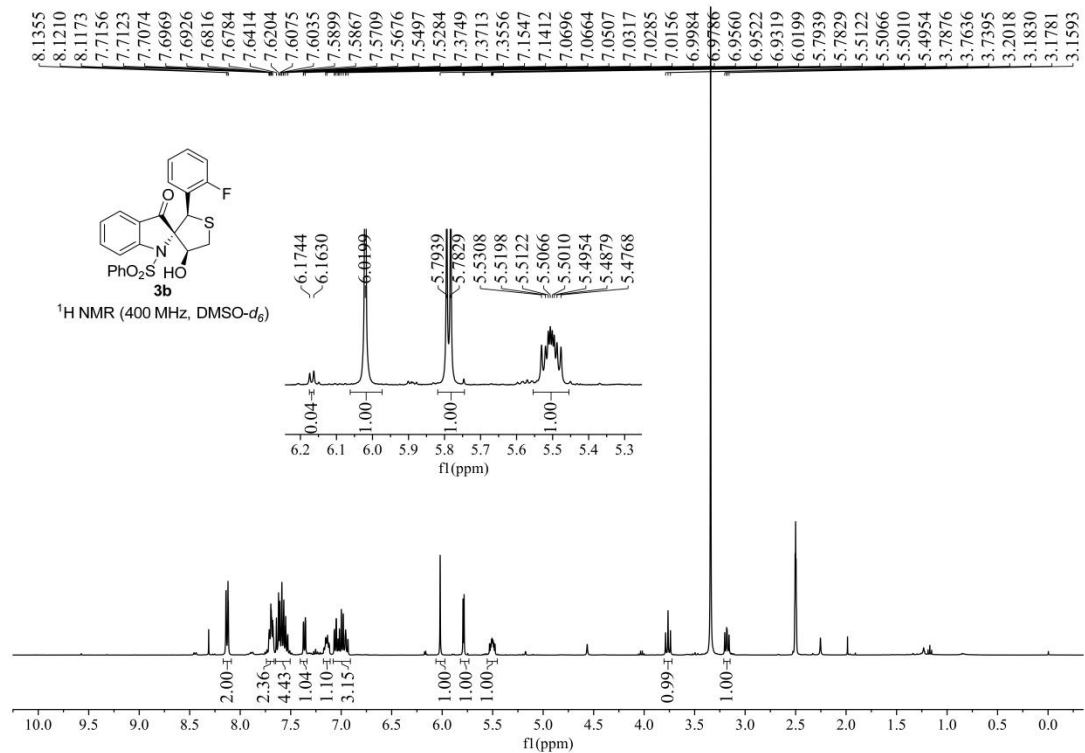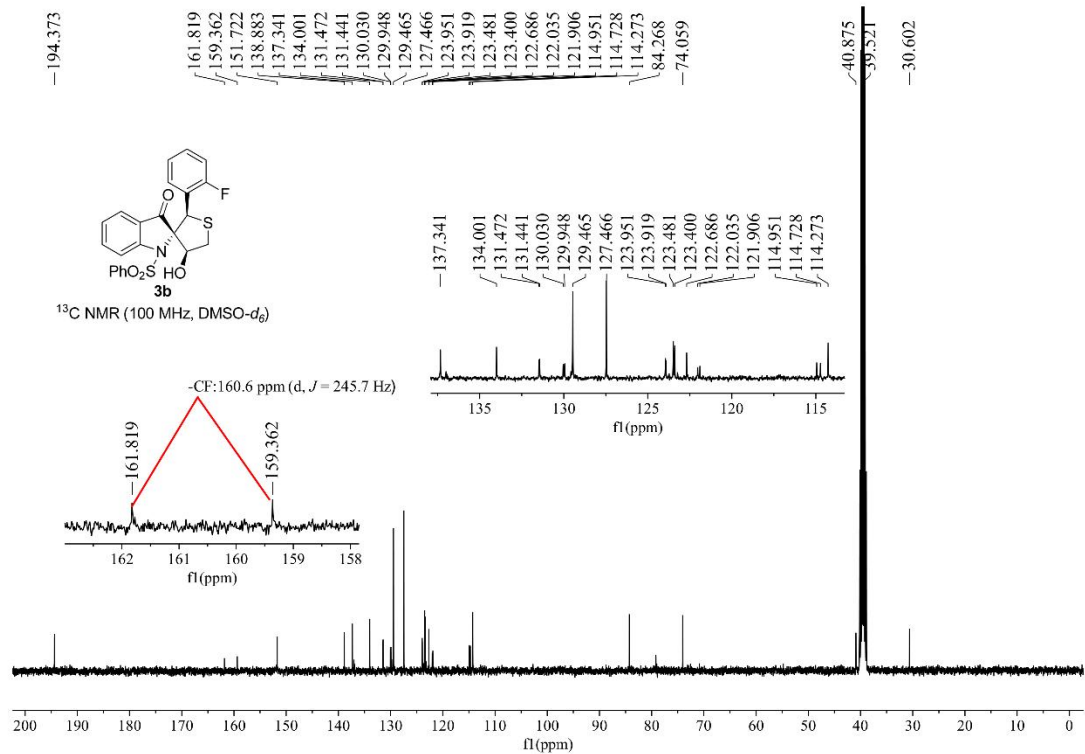

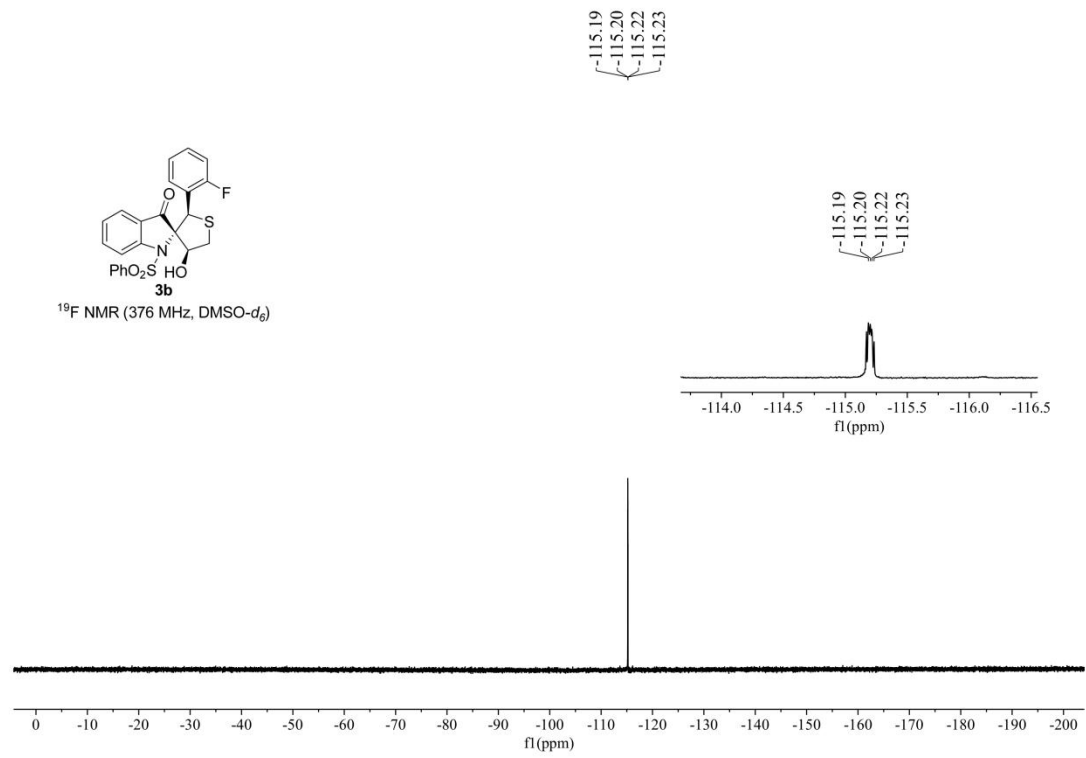

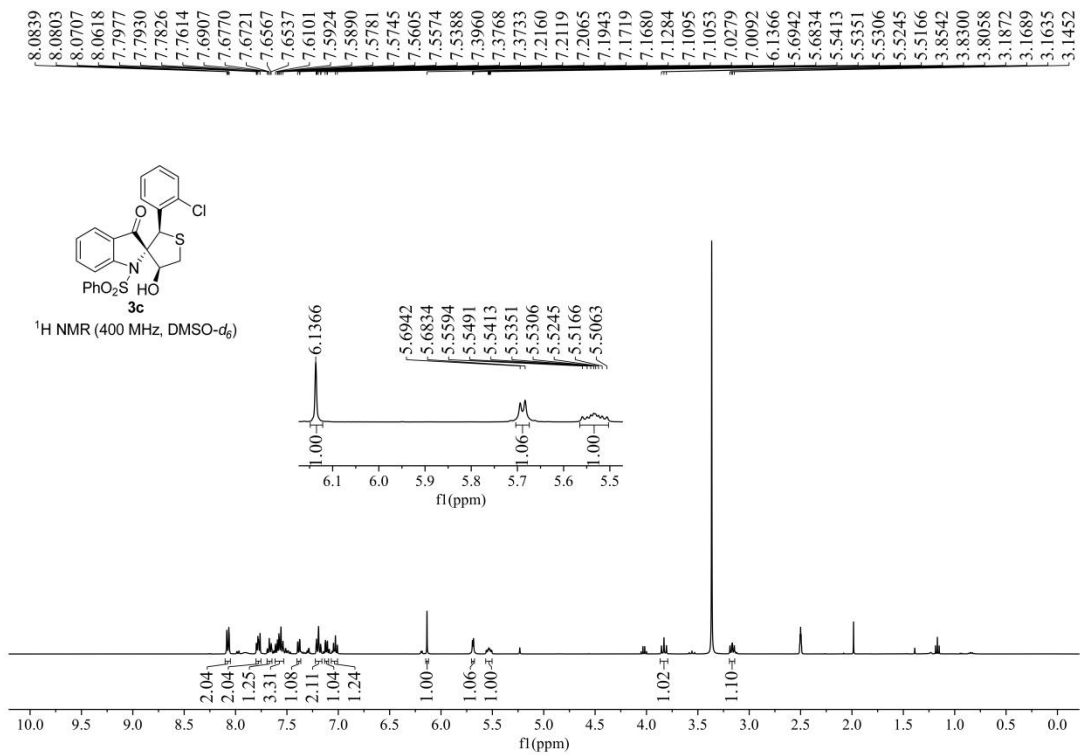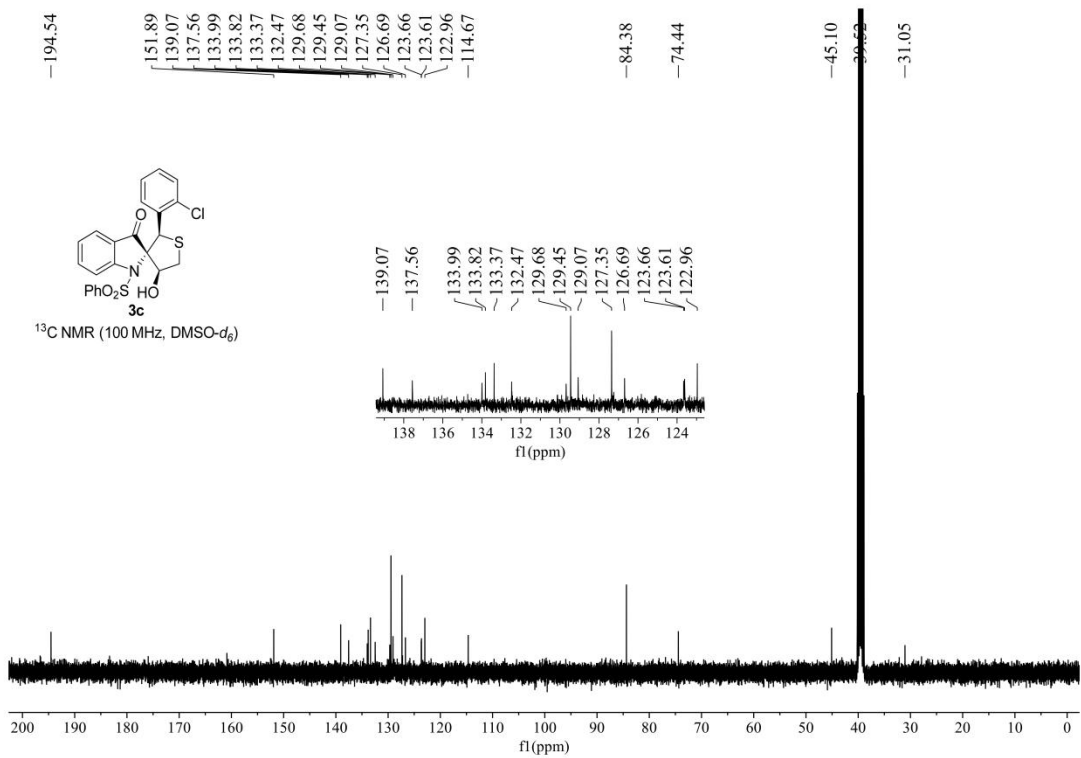



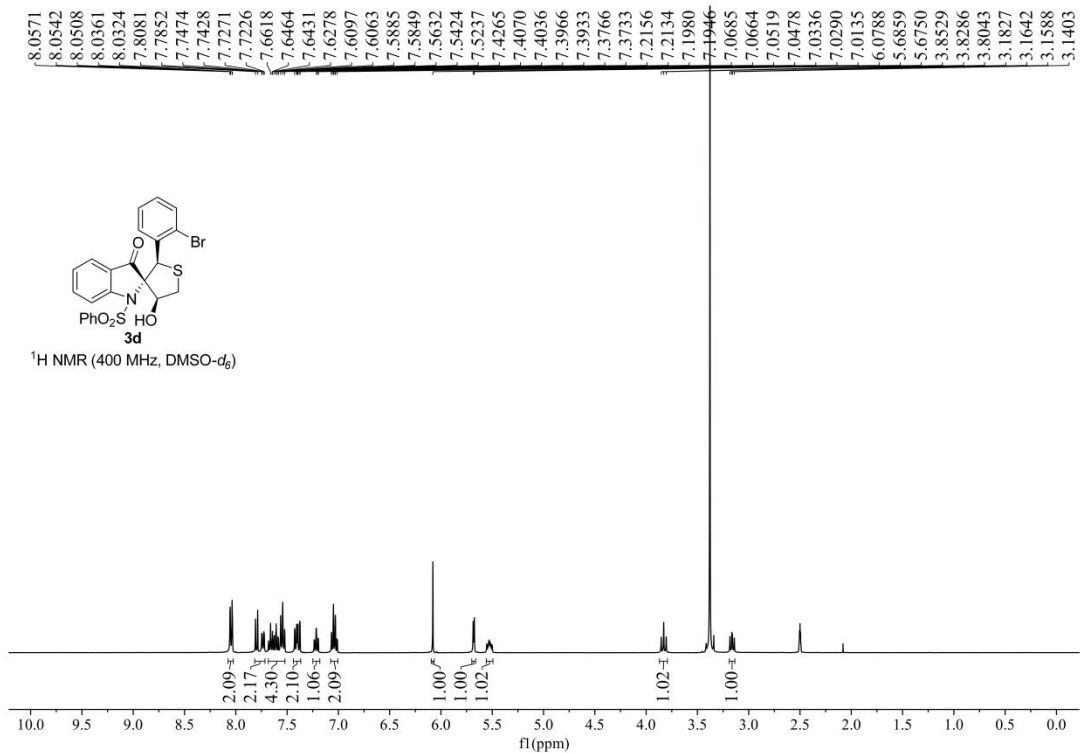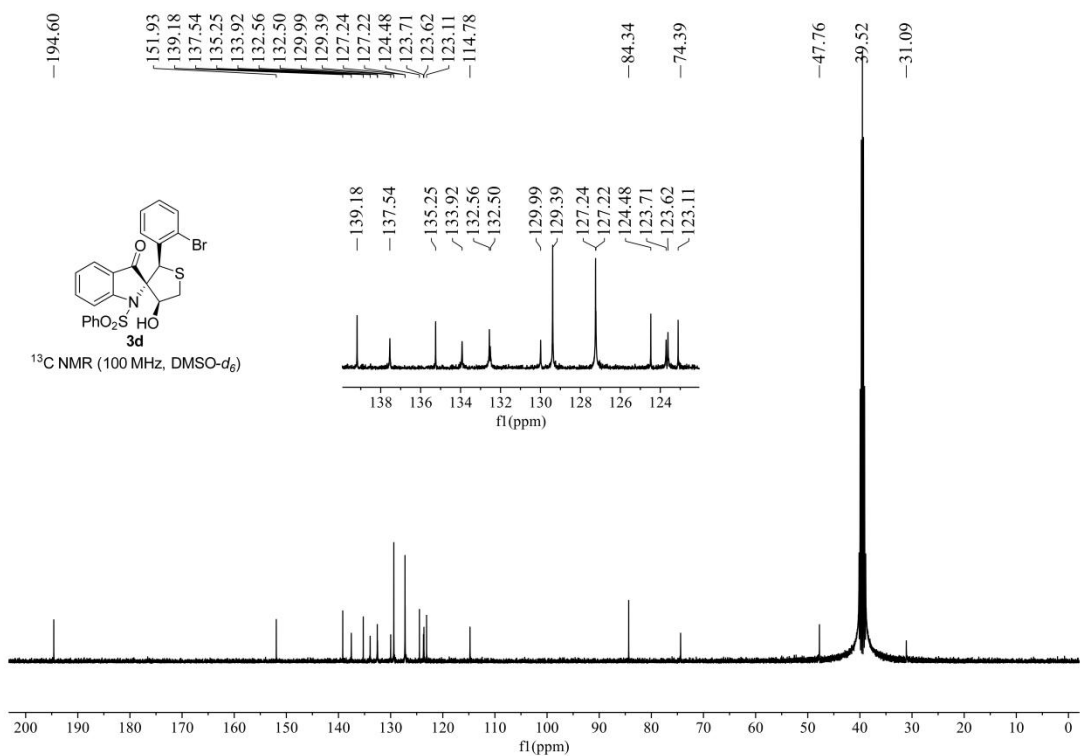

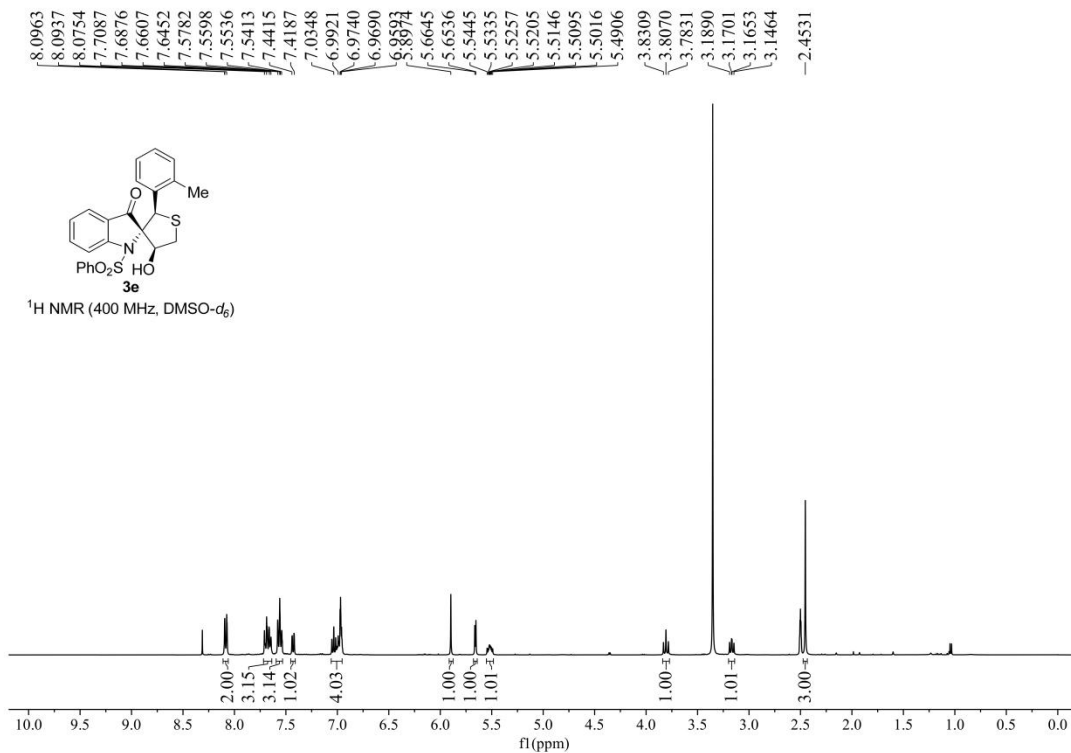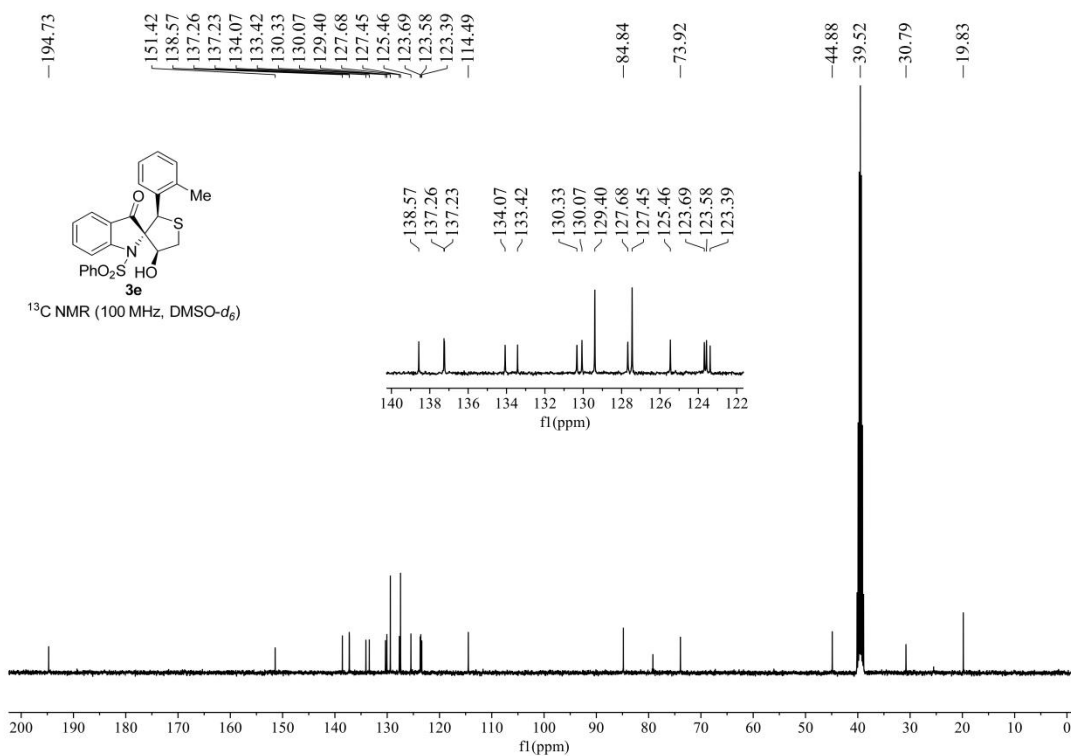

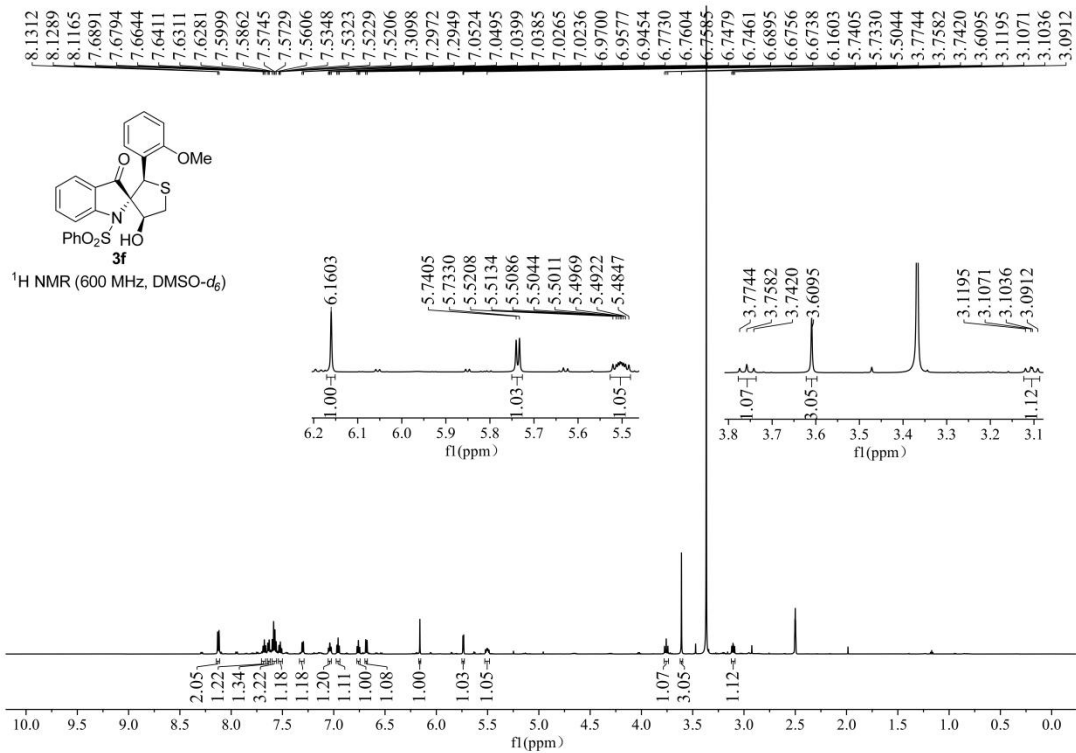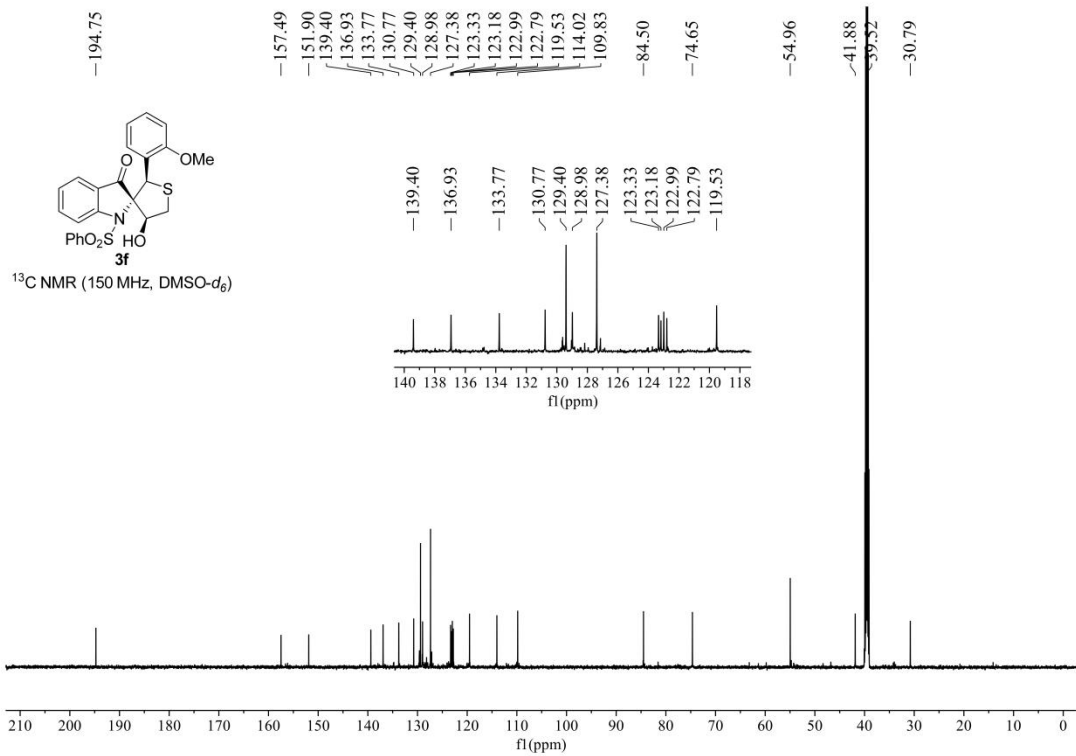

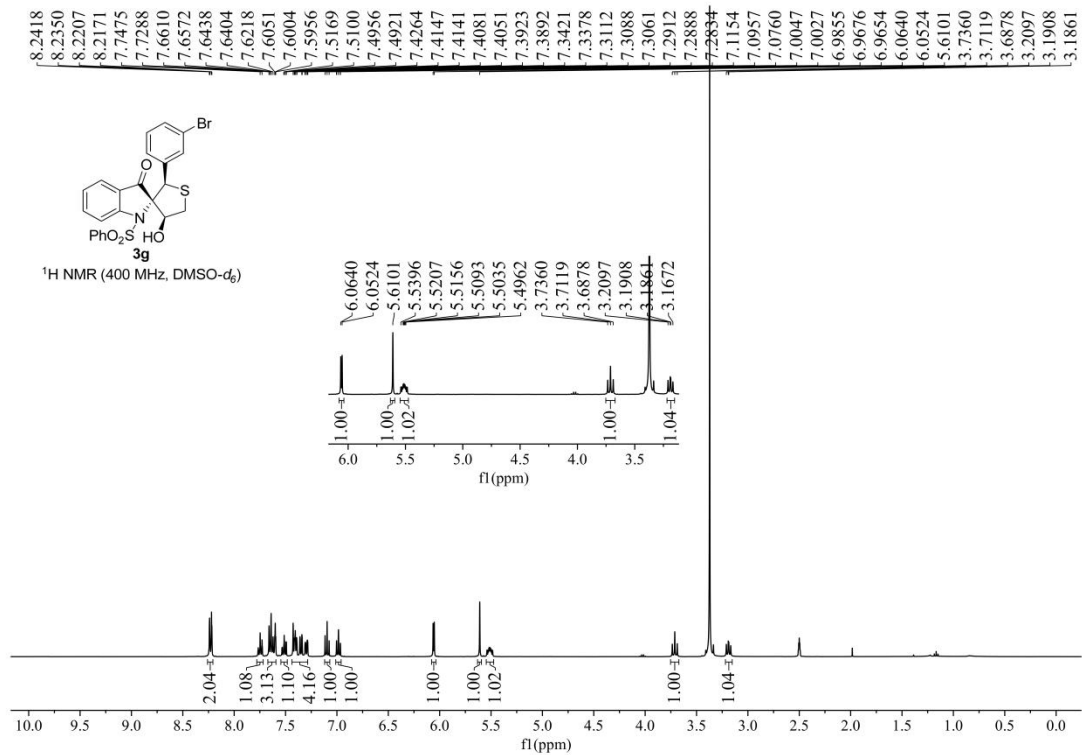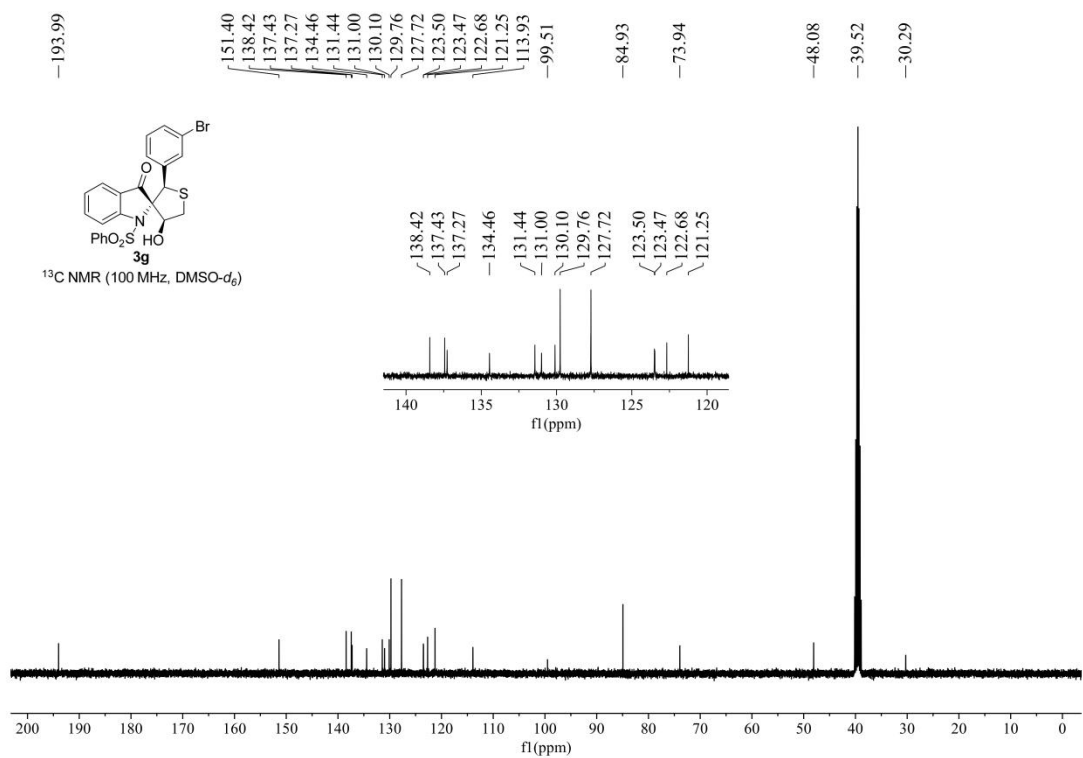

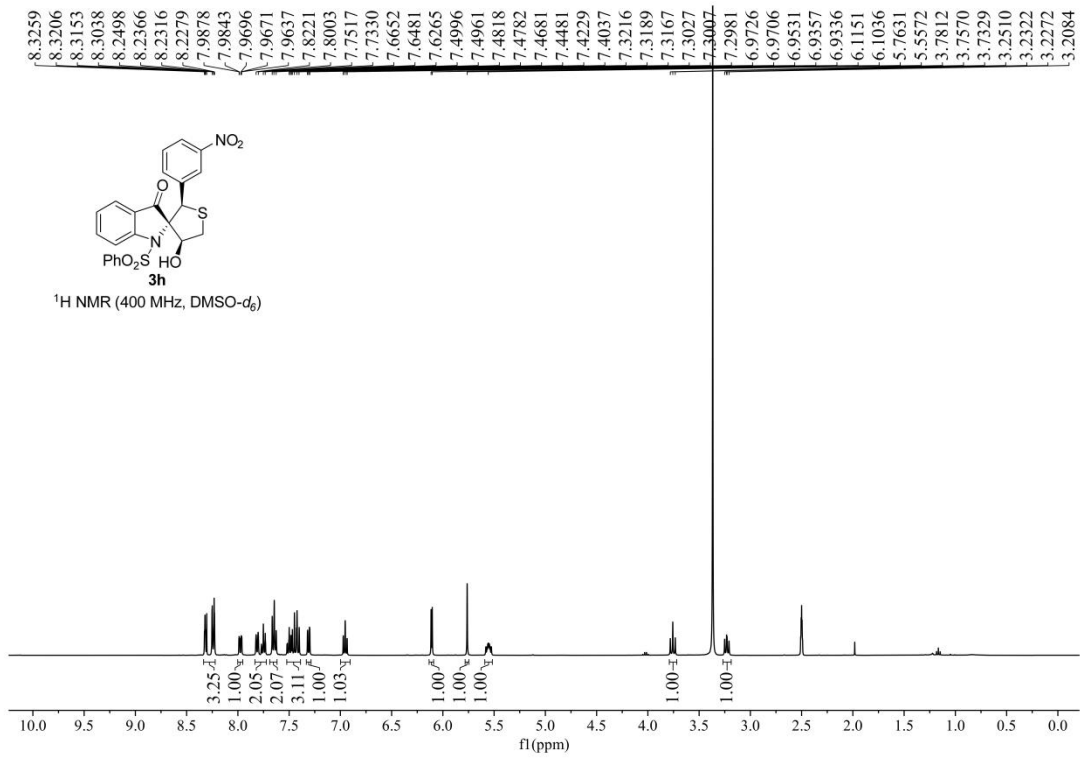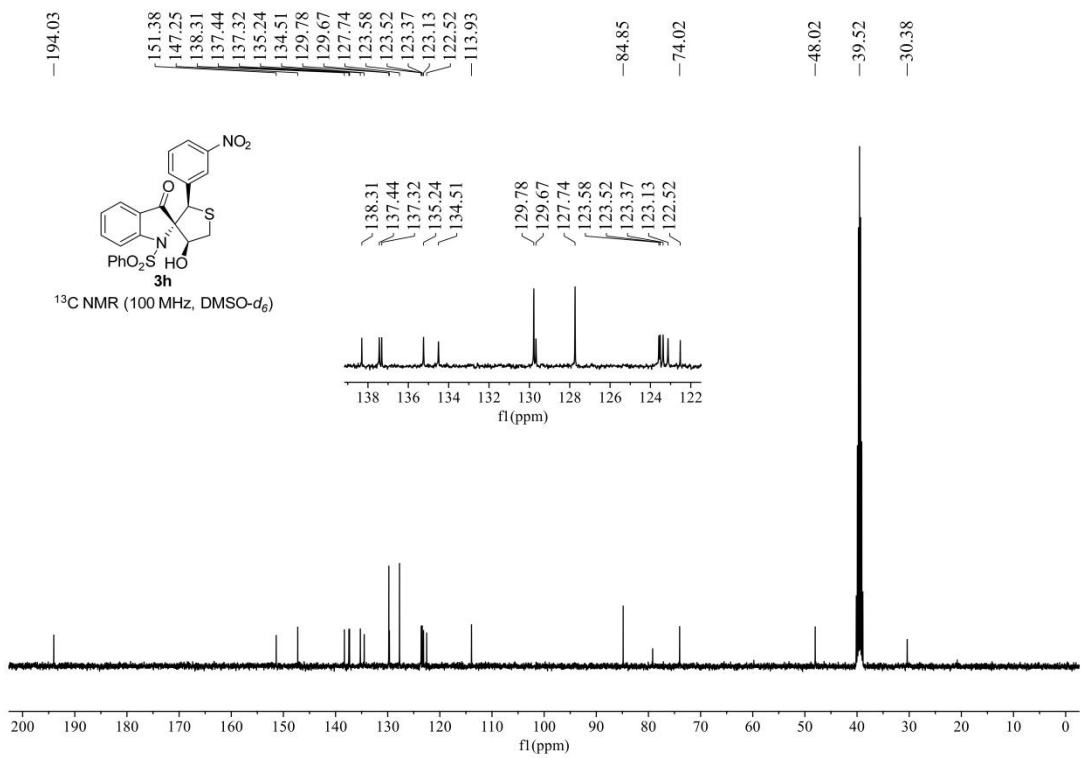

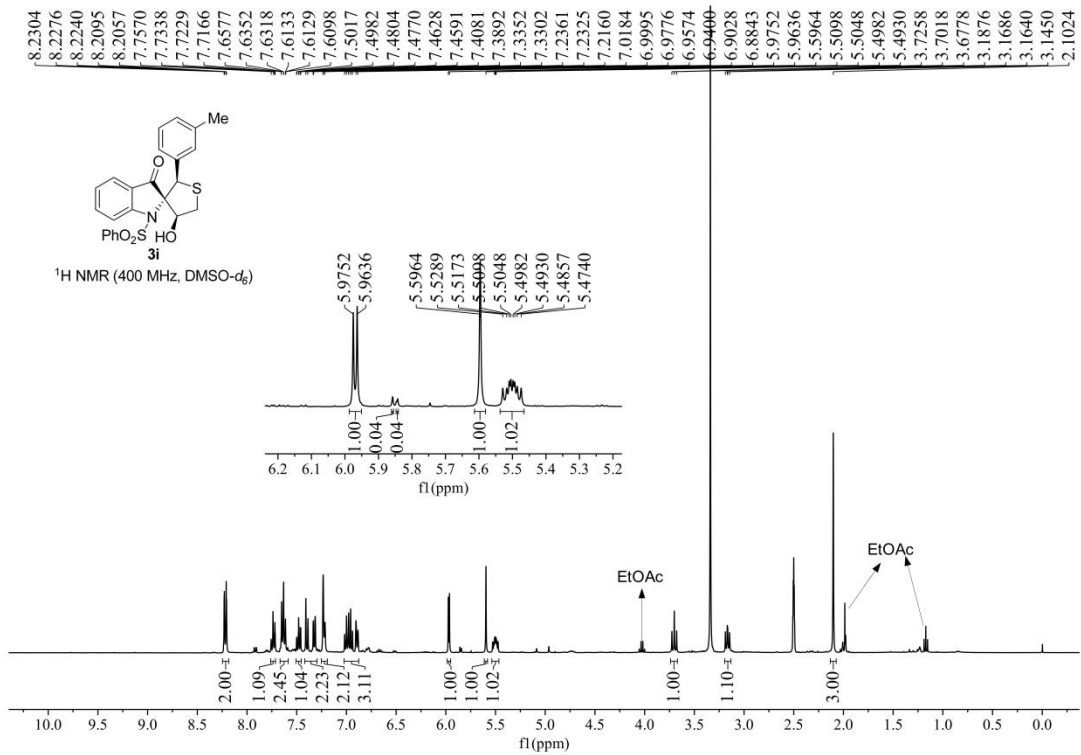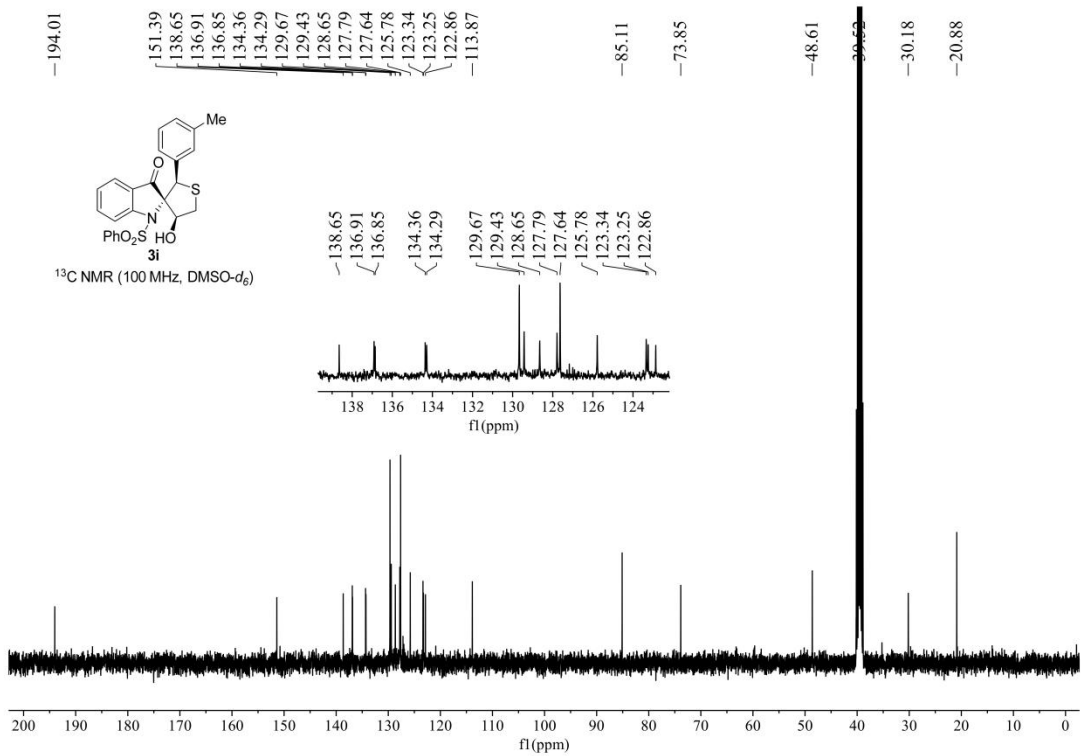

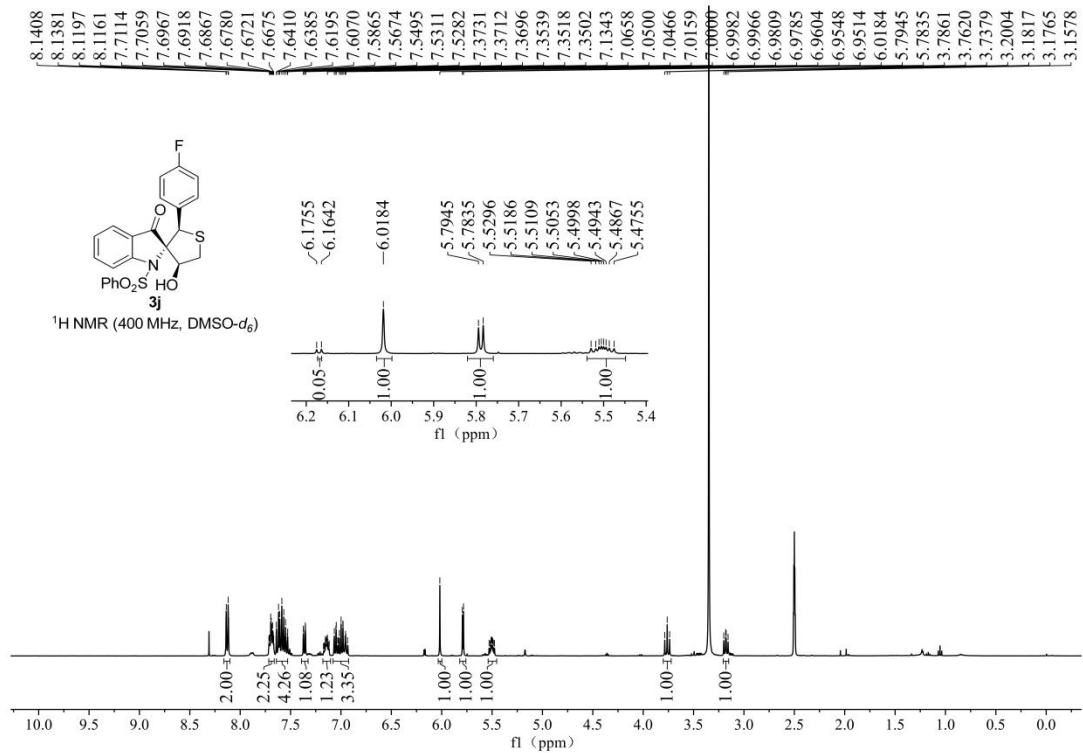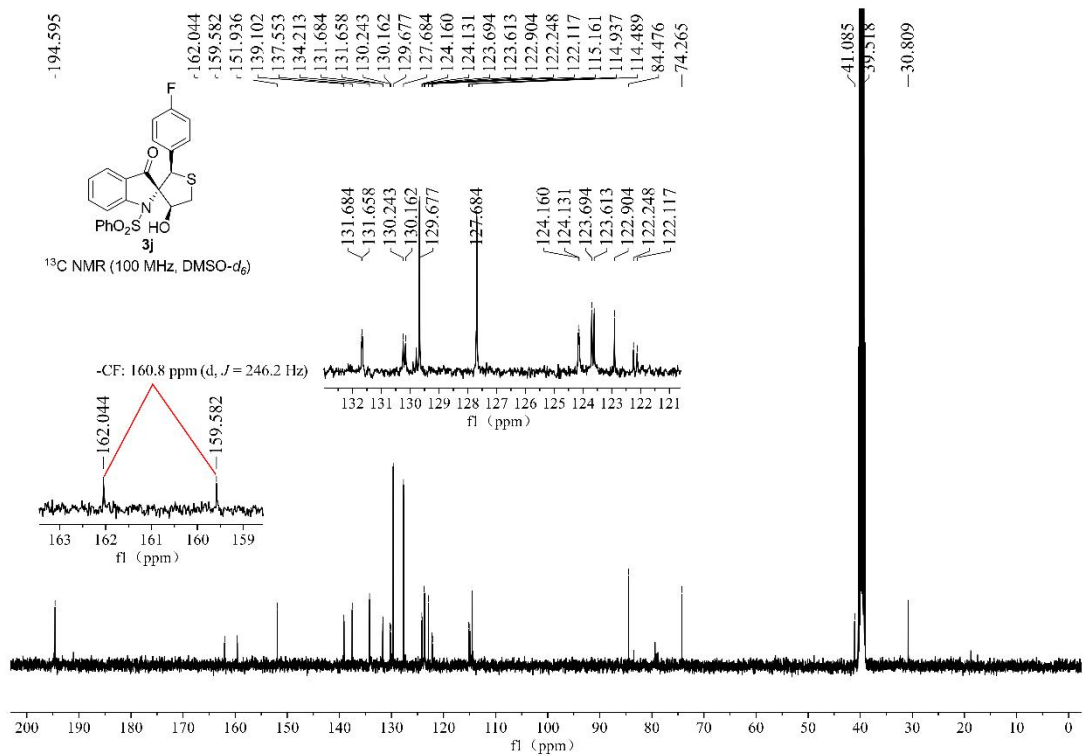

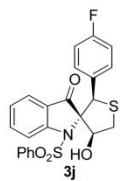

<sup>19</sup>F NMR (376 MHz, DMSO-*d*<sub>6</sub>)

-115.16  
-115.18  
-115.21  
-115.22  
-115.23

-115.16  
-115.18  
-115.21  
-115.22  
-115.23

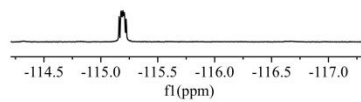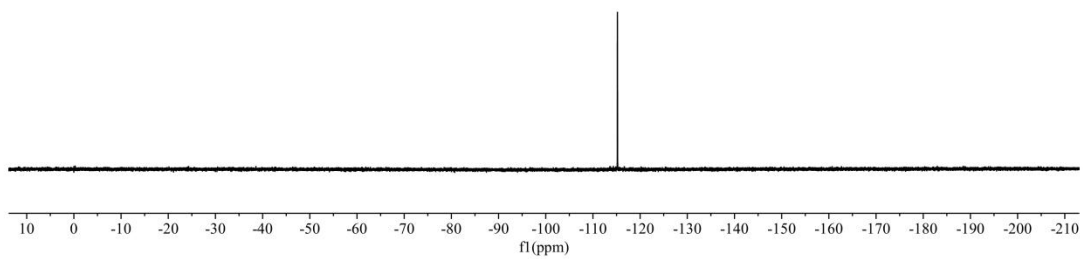



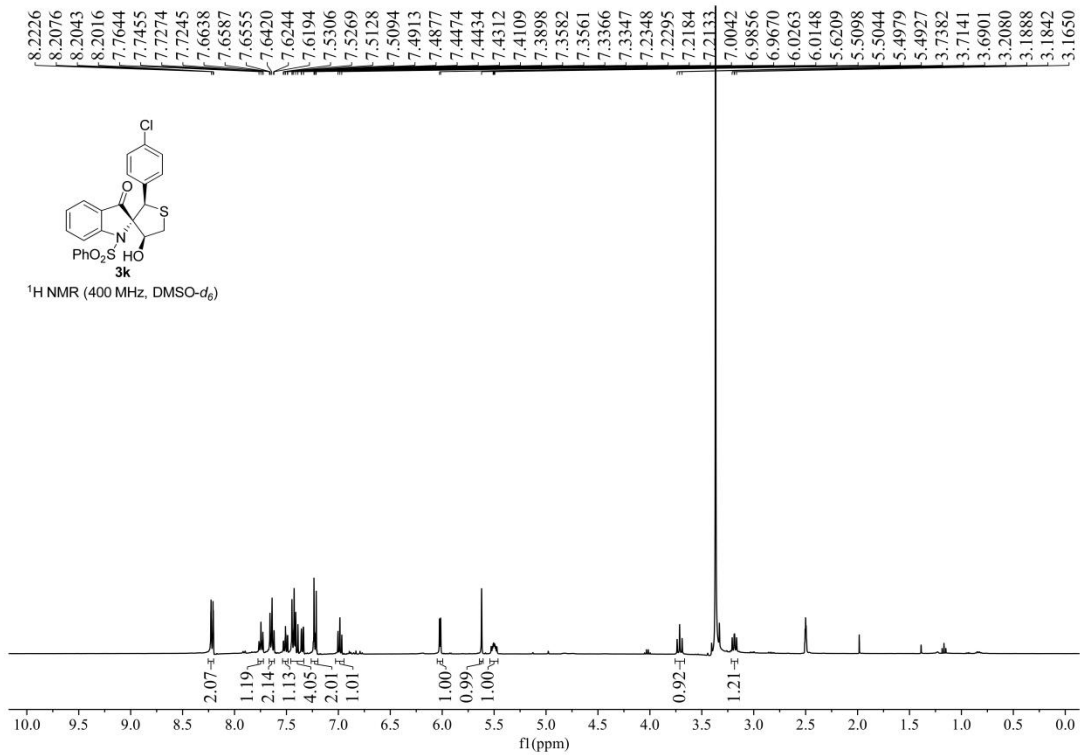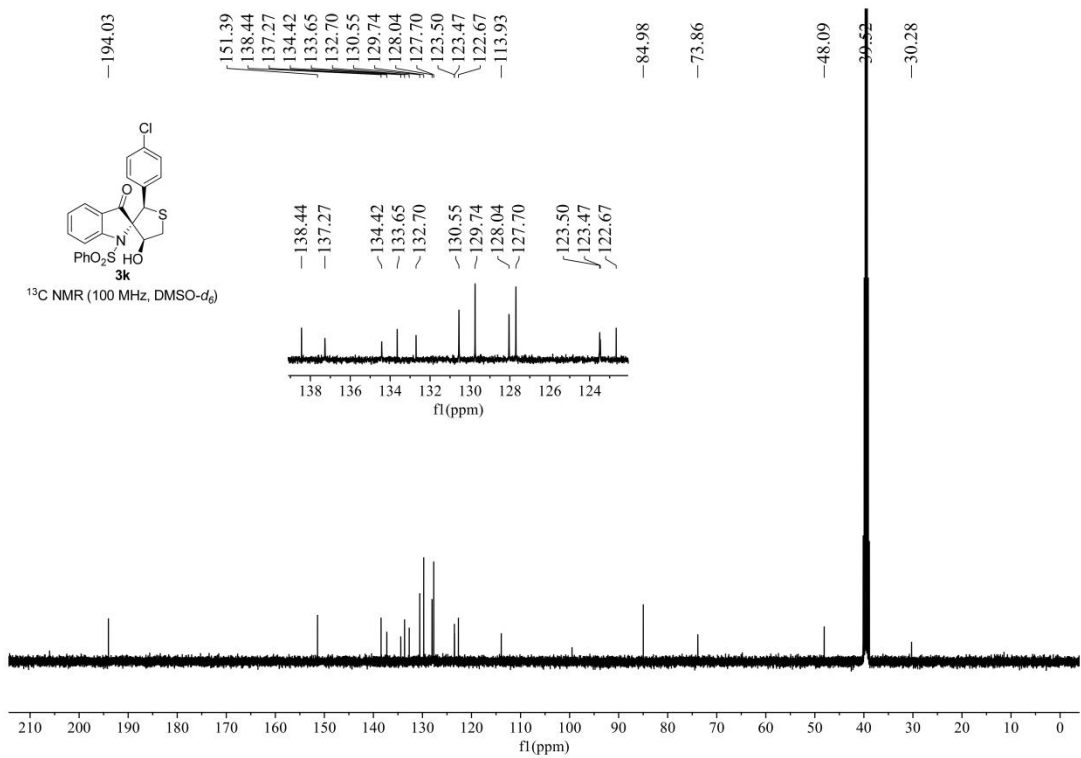

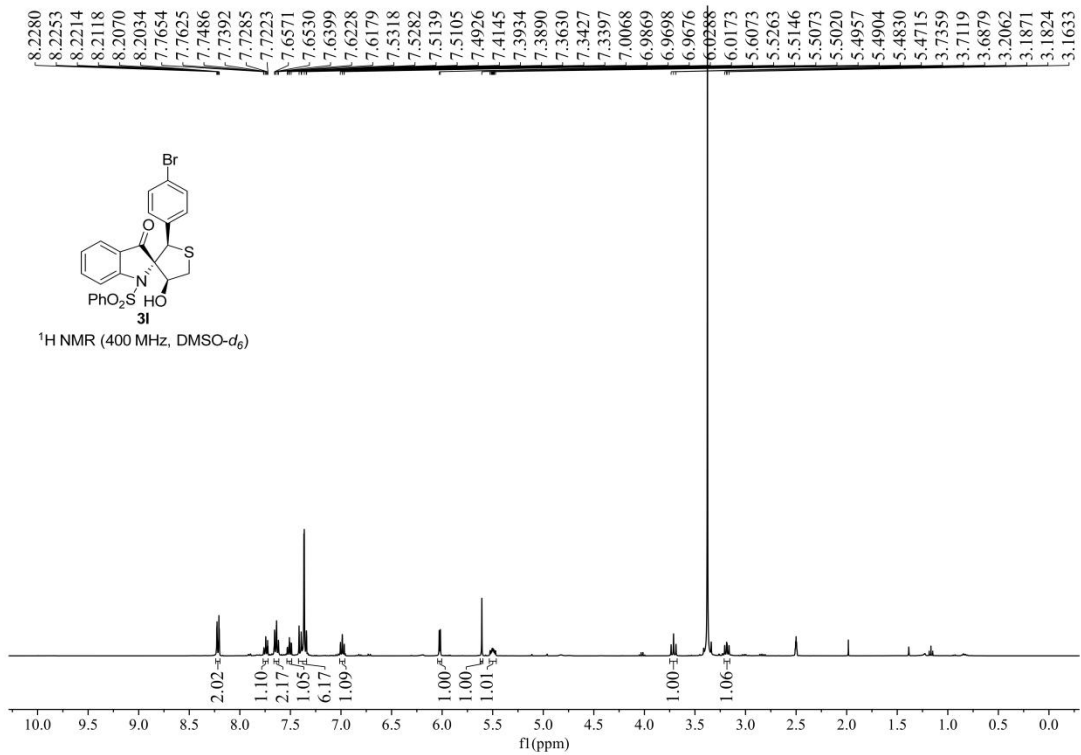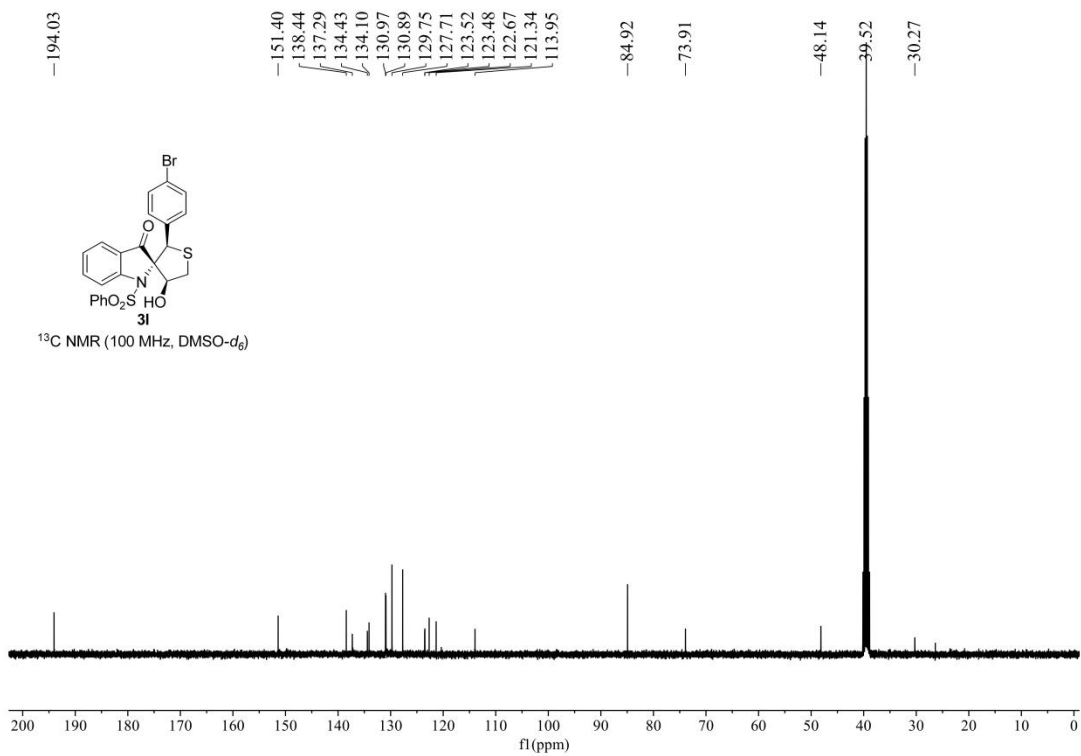

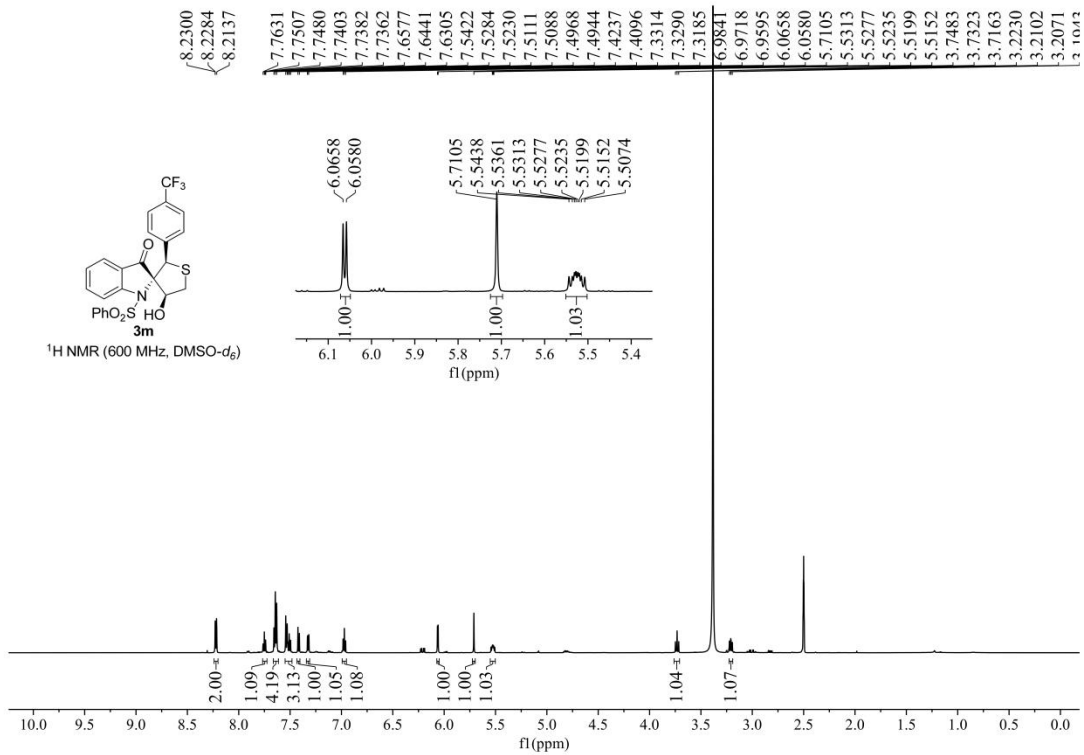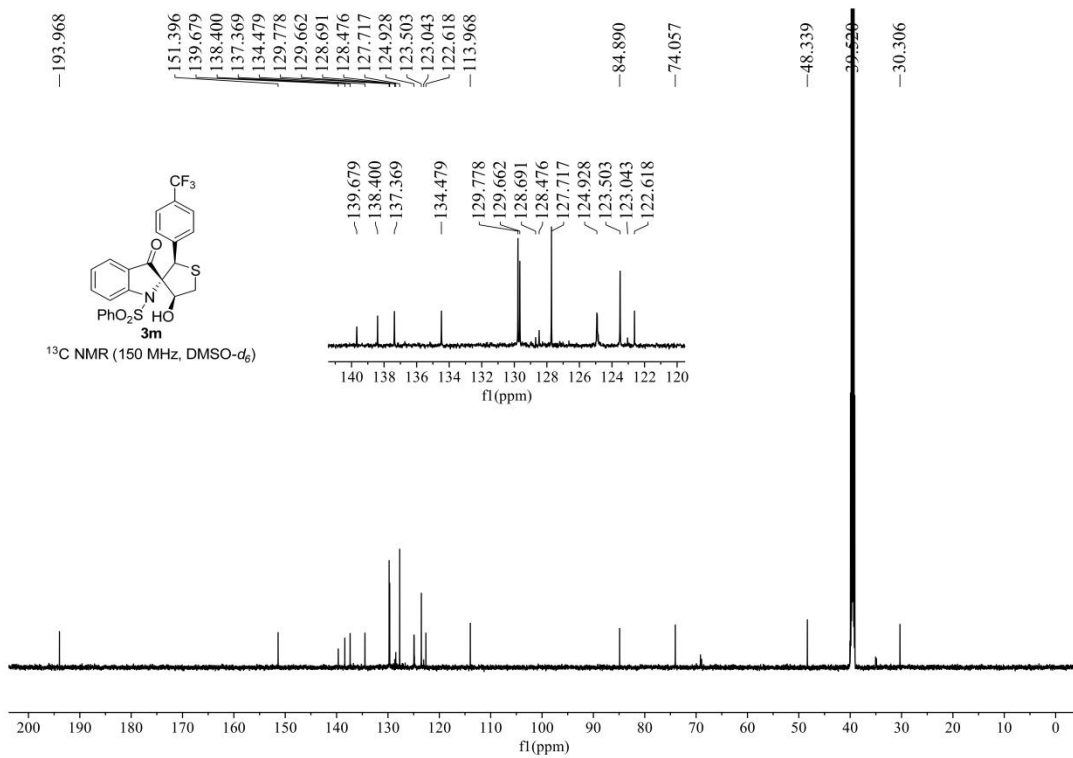

61.09

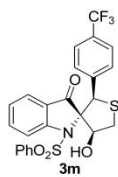

<sup>19</sup>F NMR (565 MHz, DMSO-*d*<sub>6</sub>)

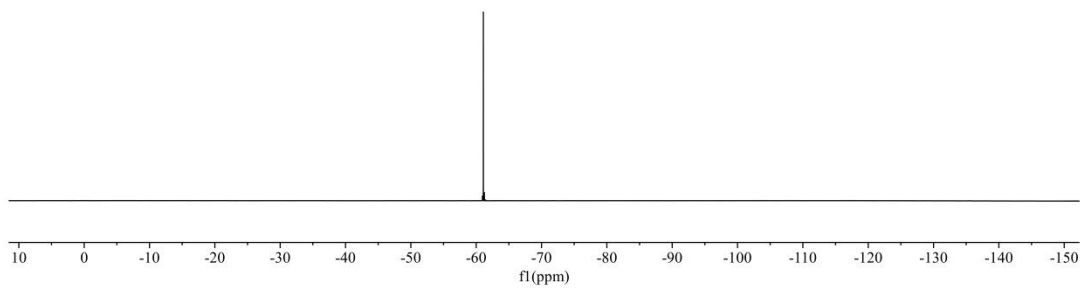

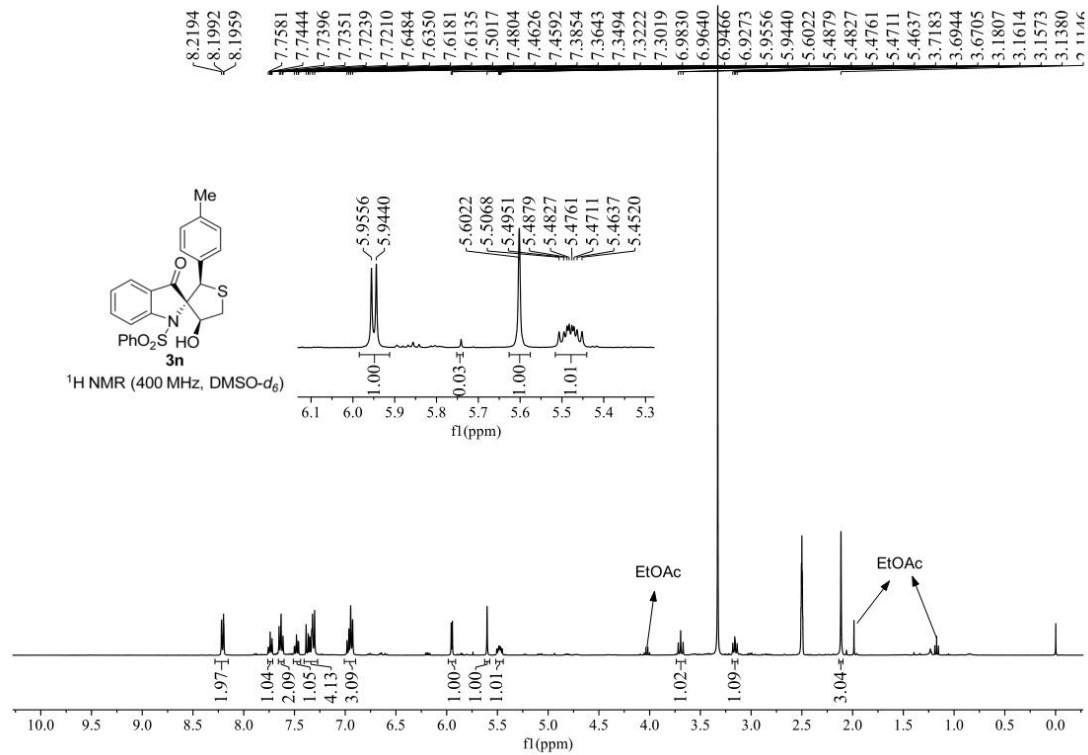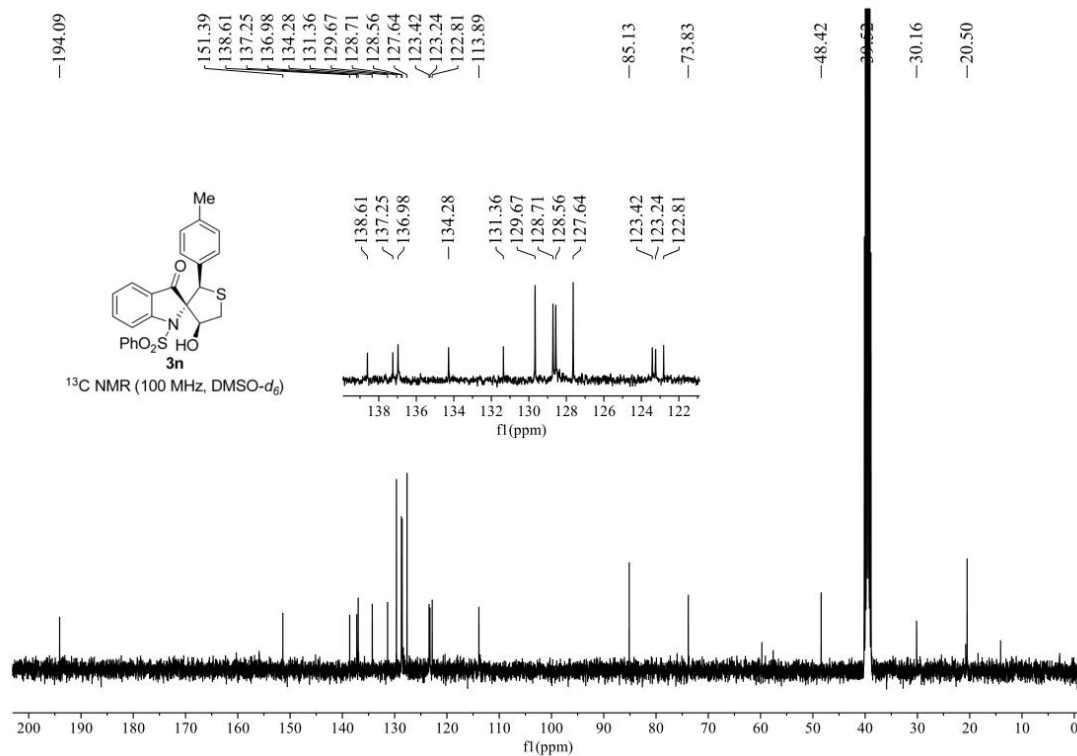

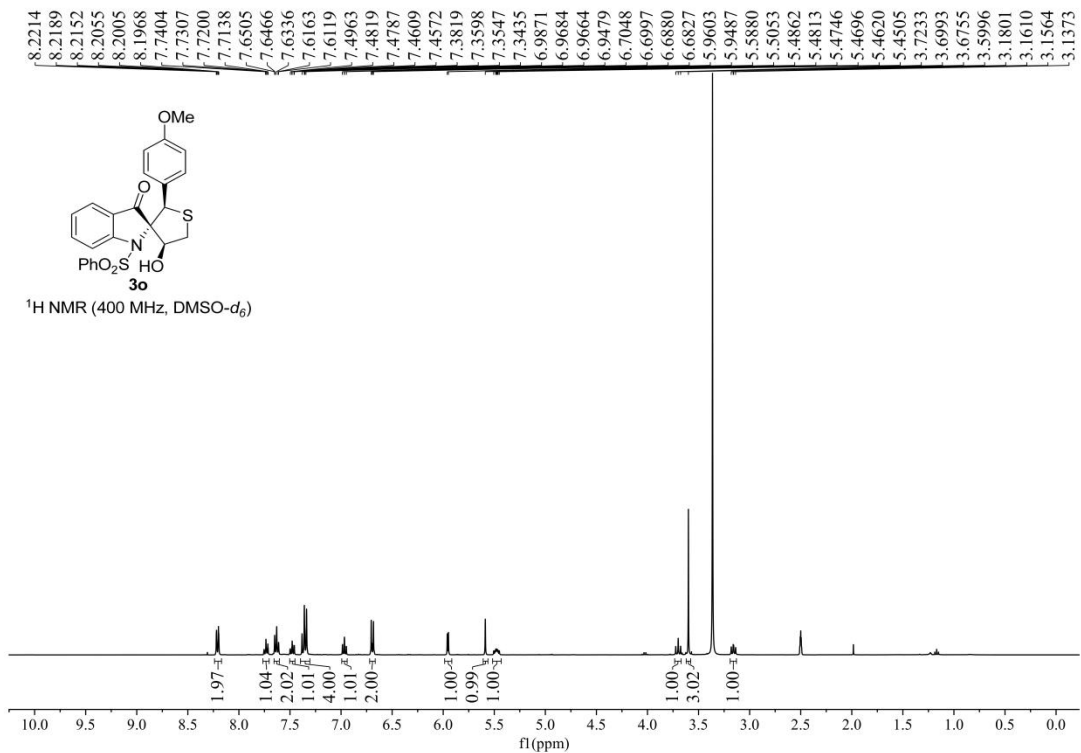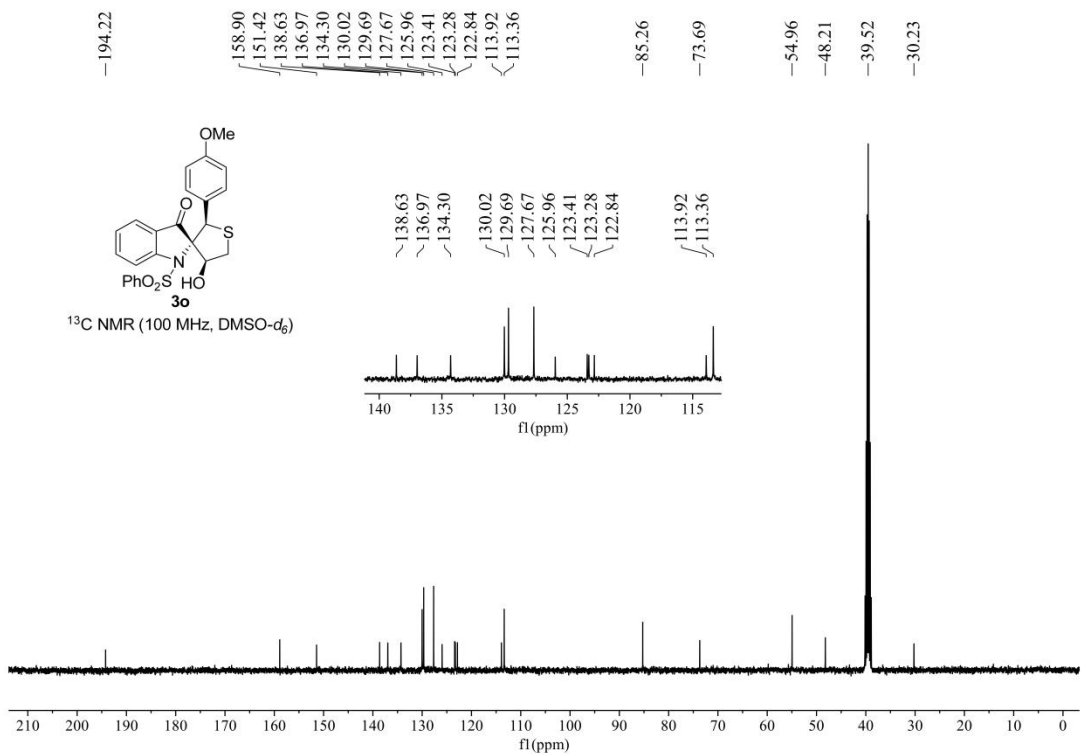

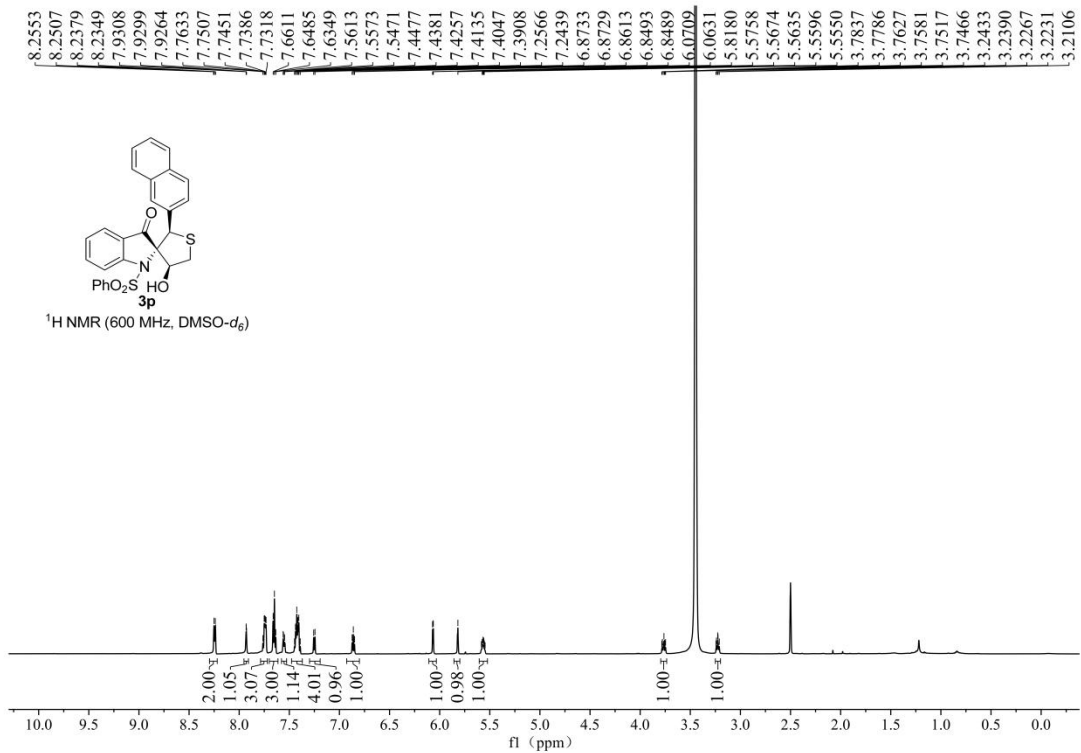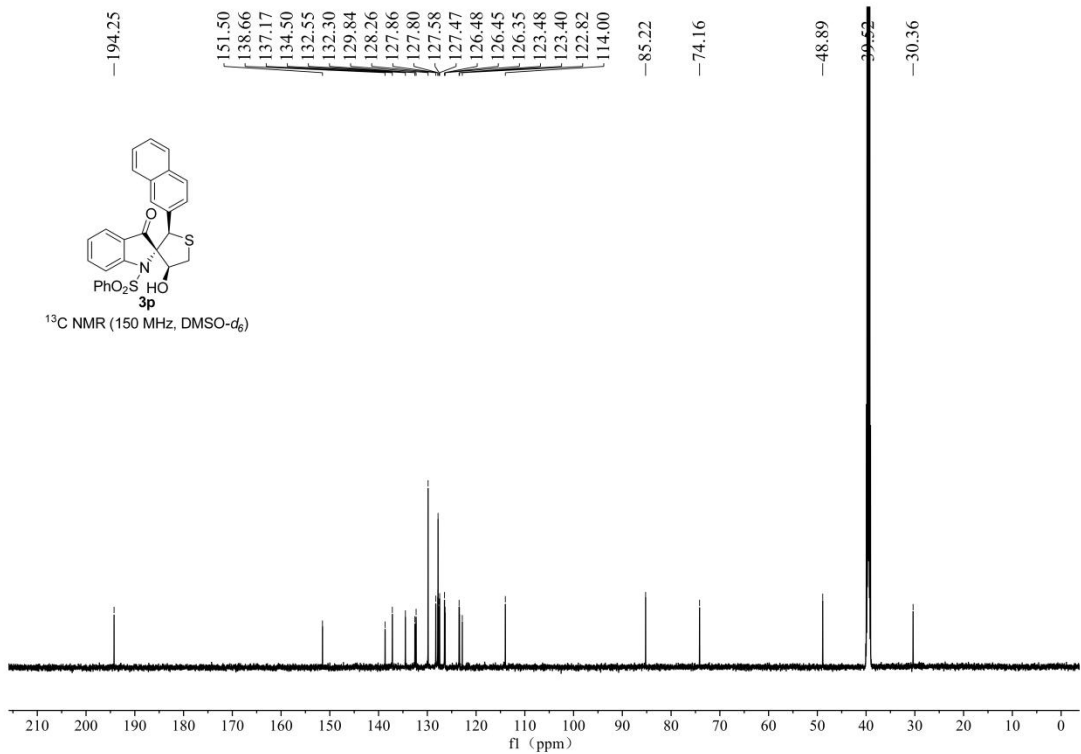

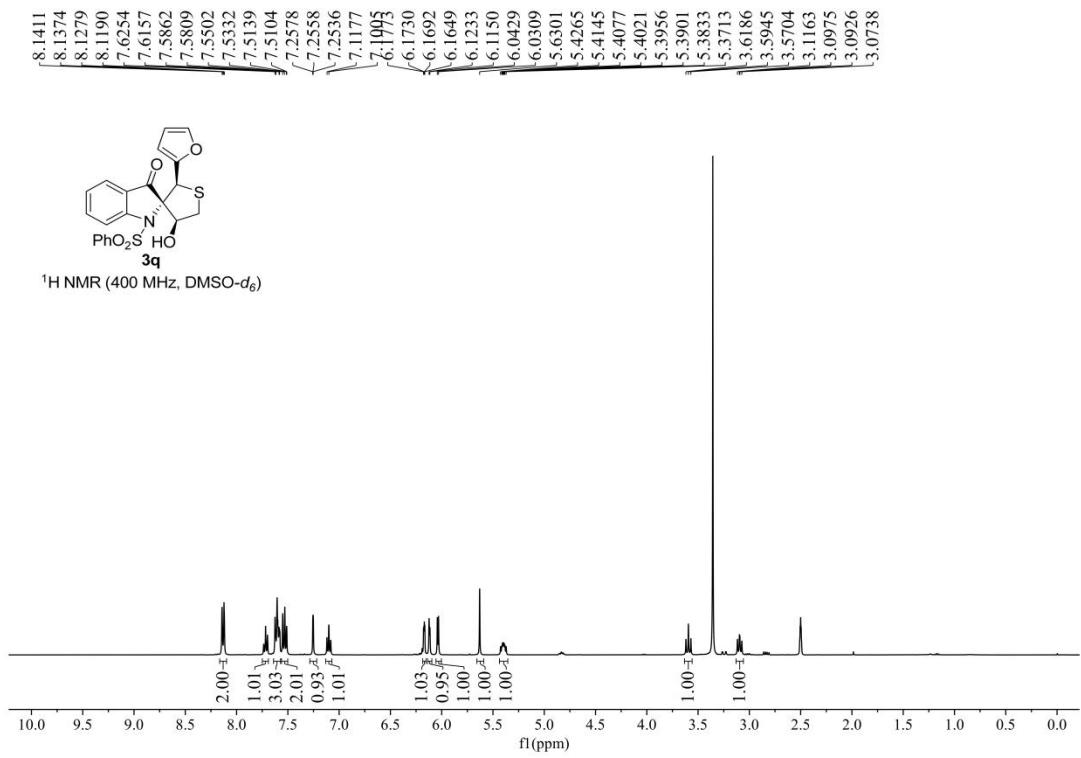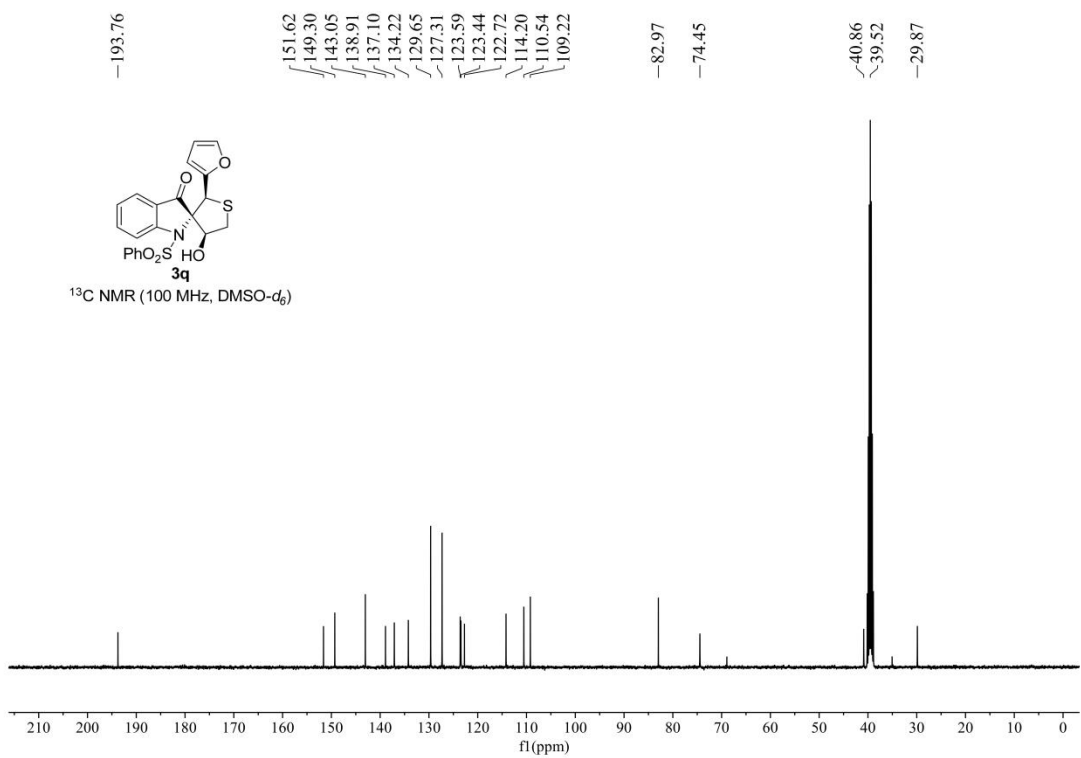



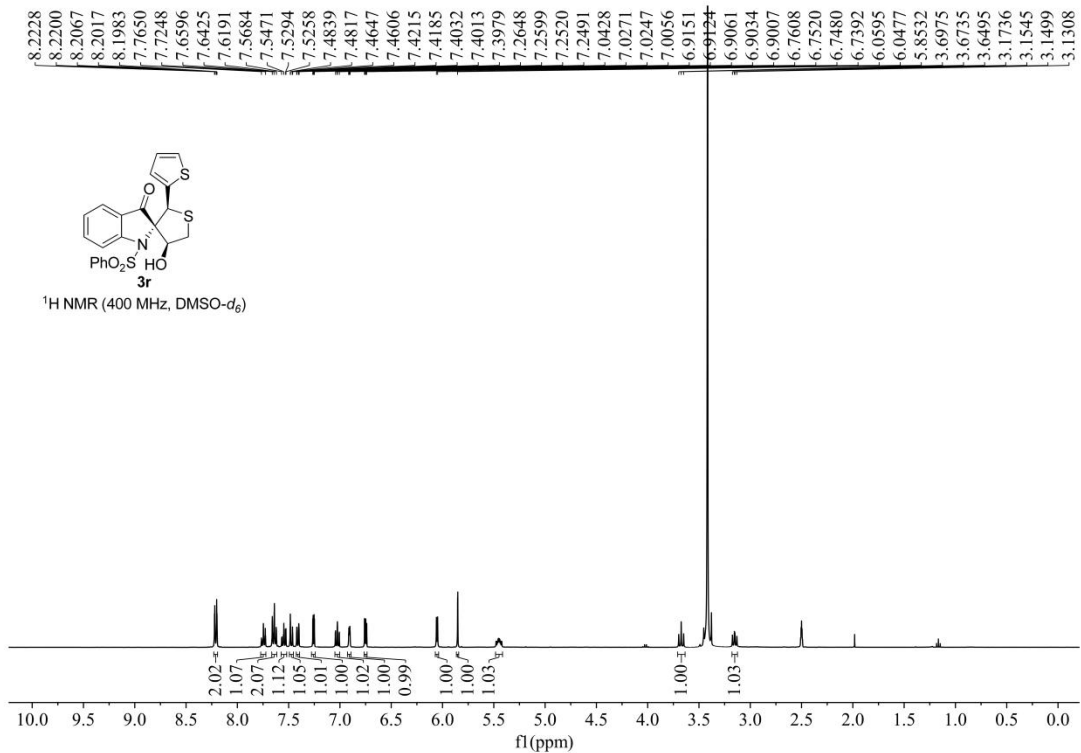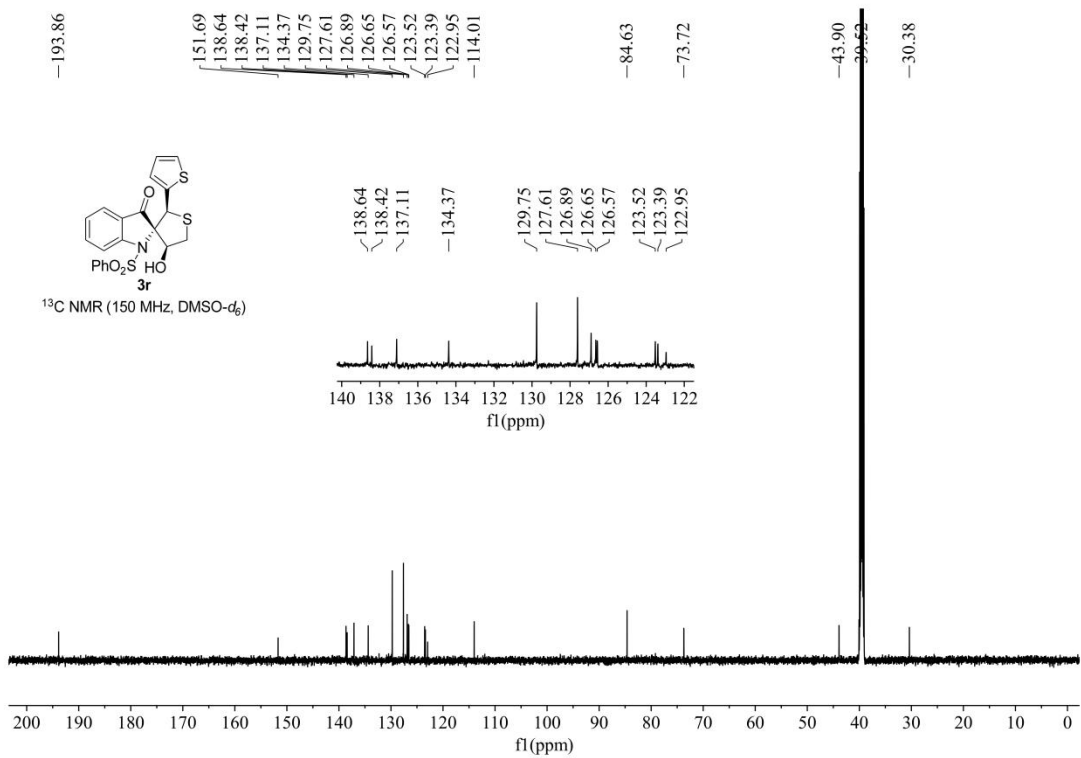

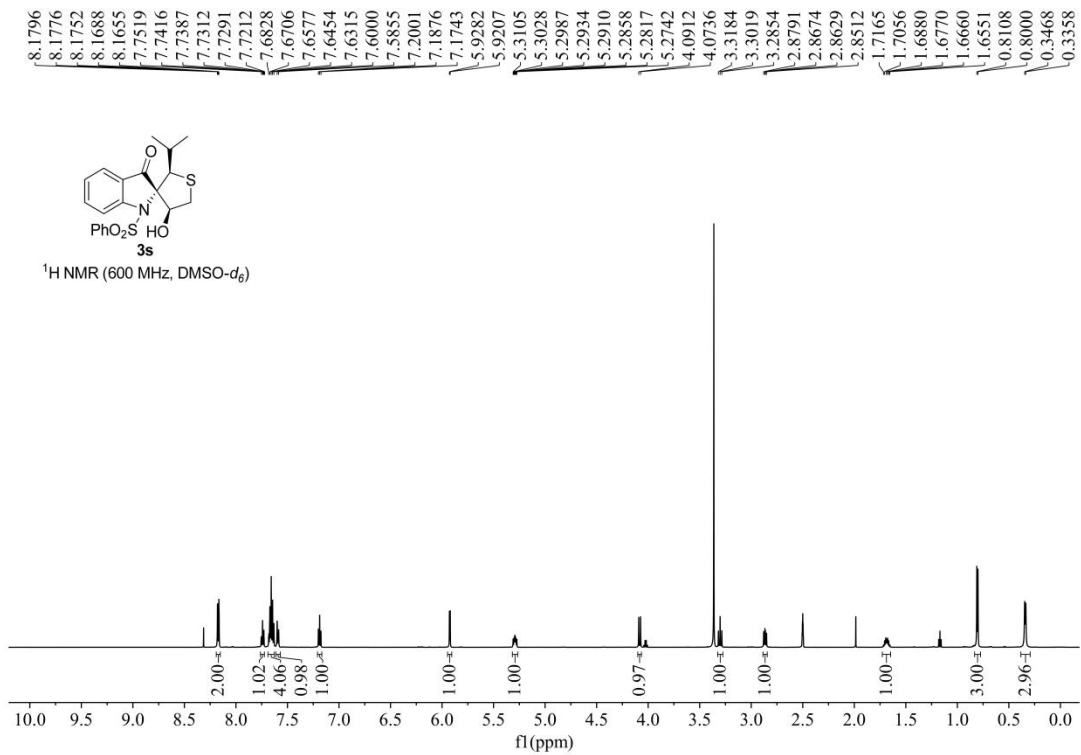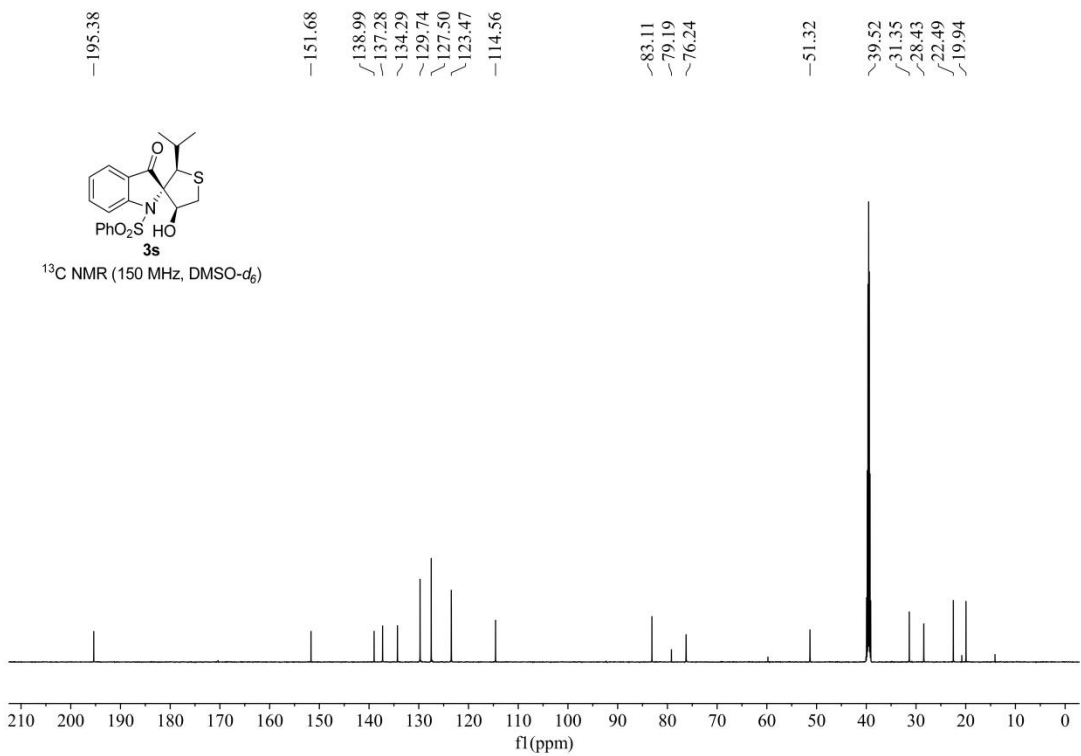

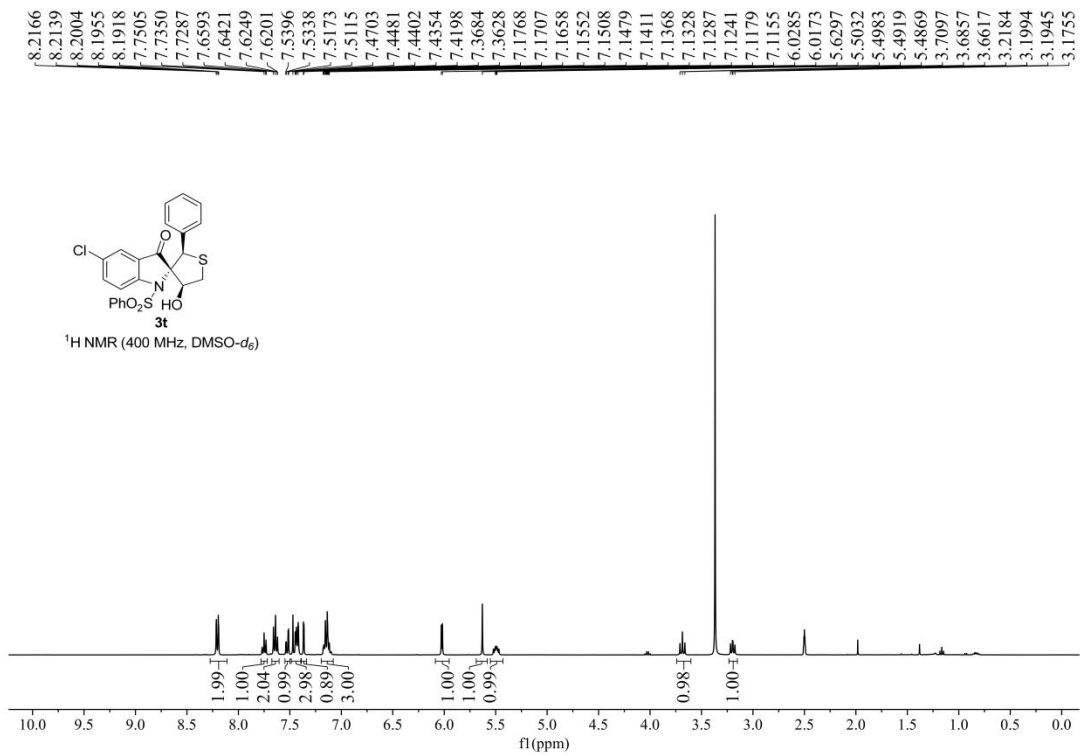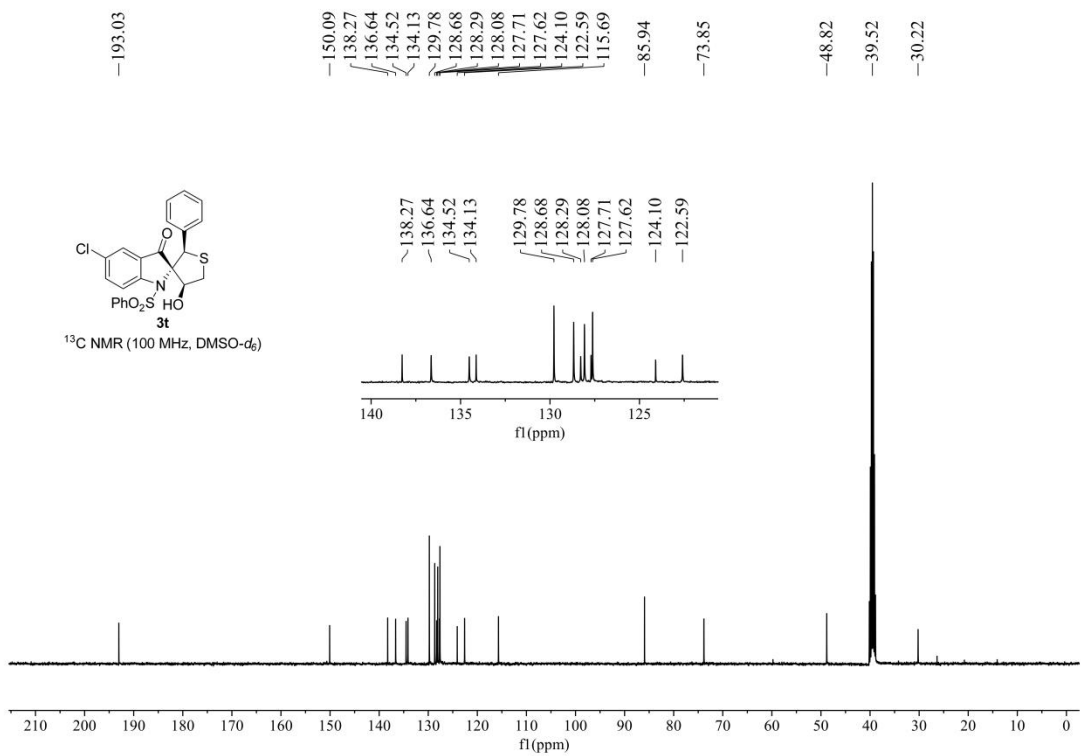

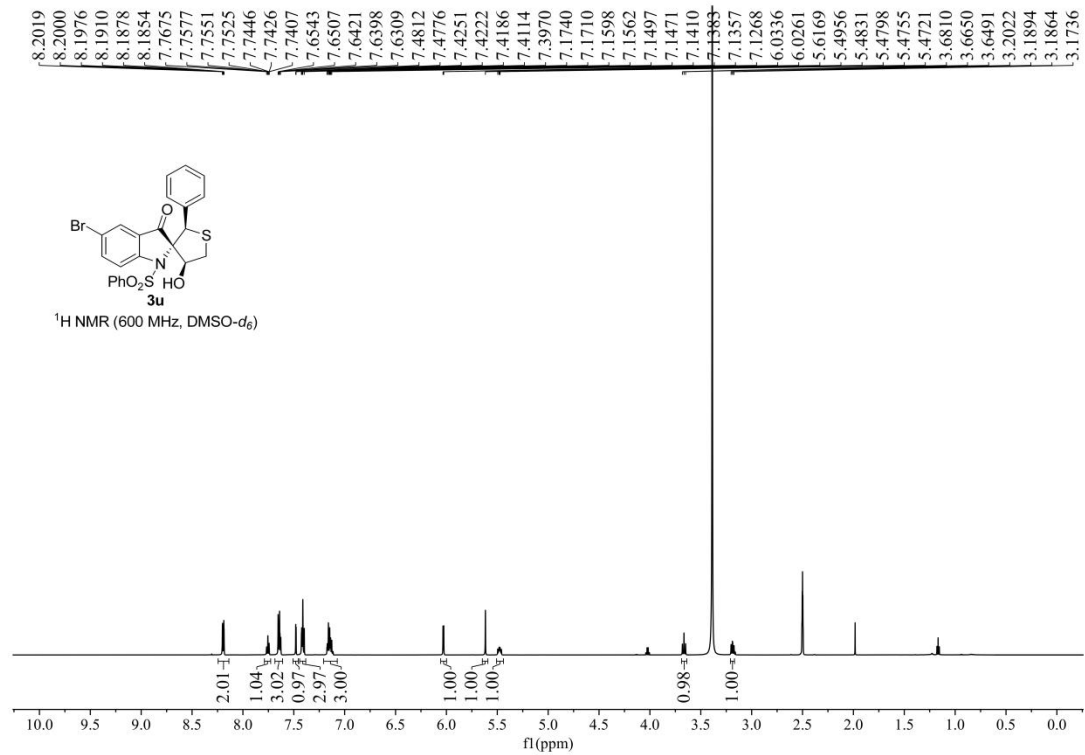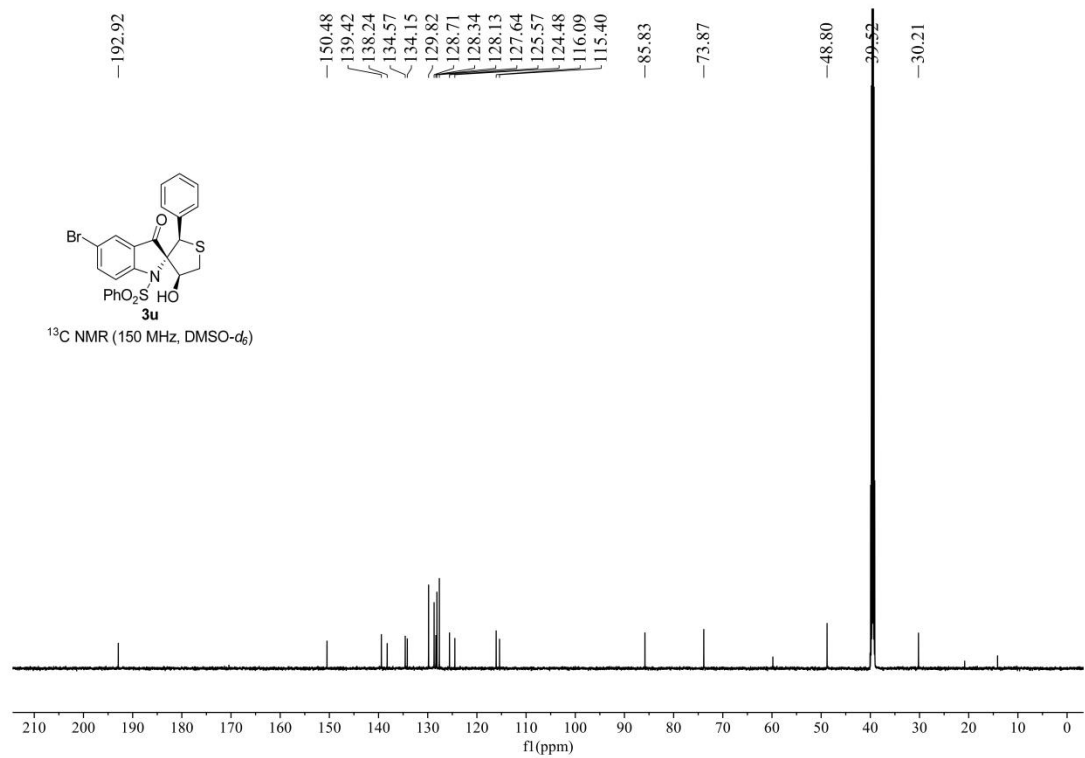

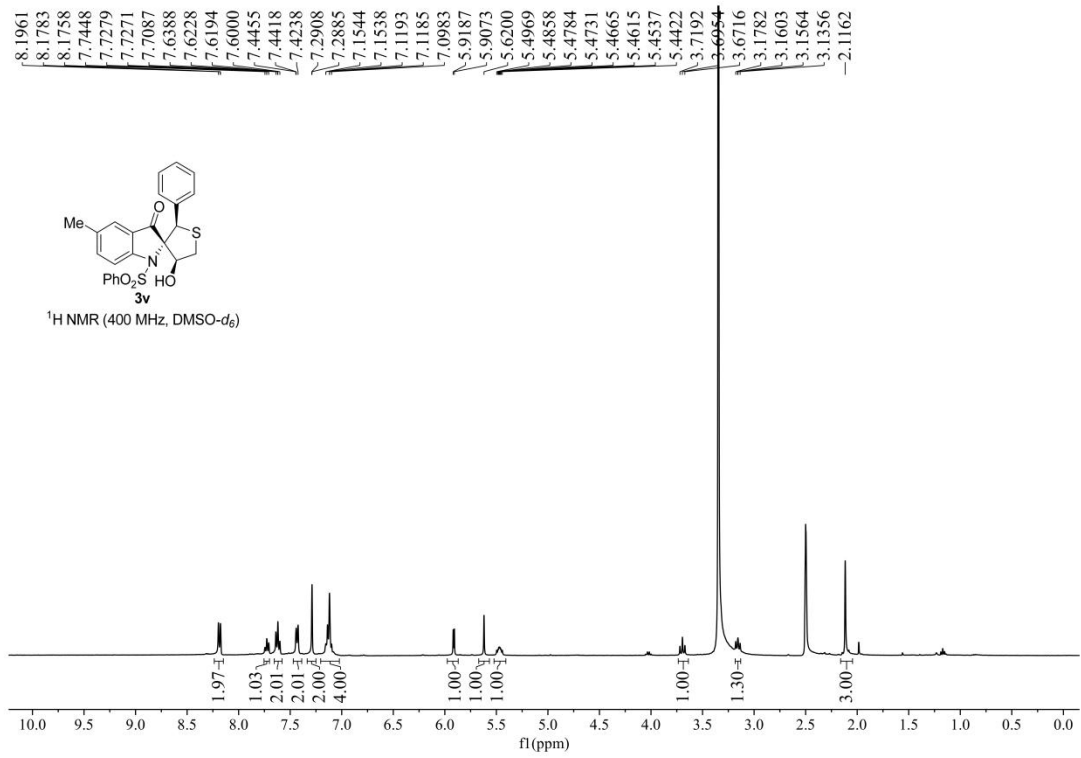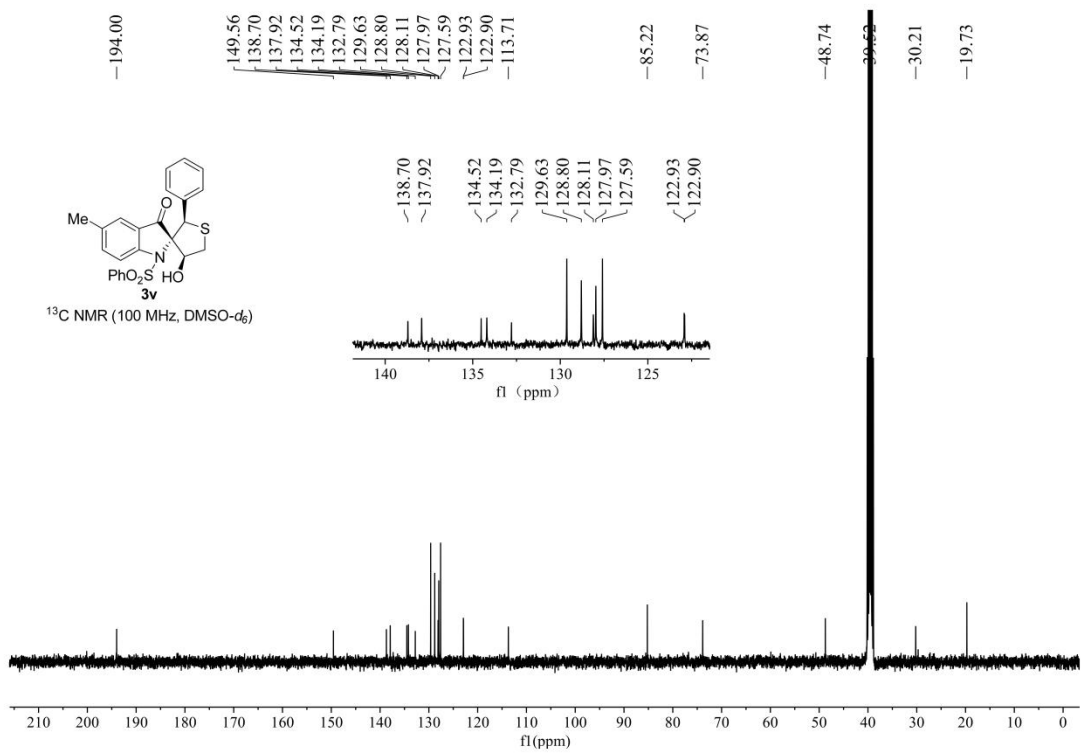

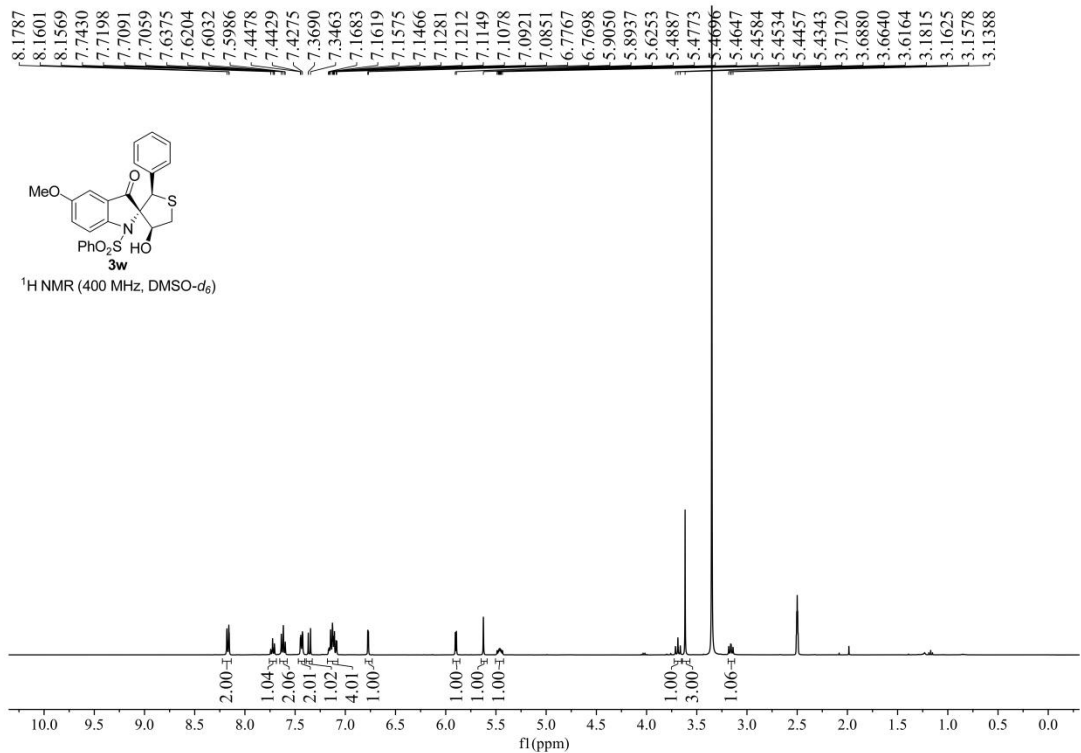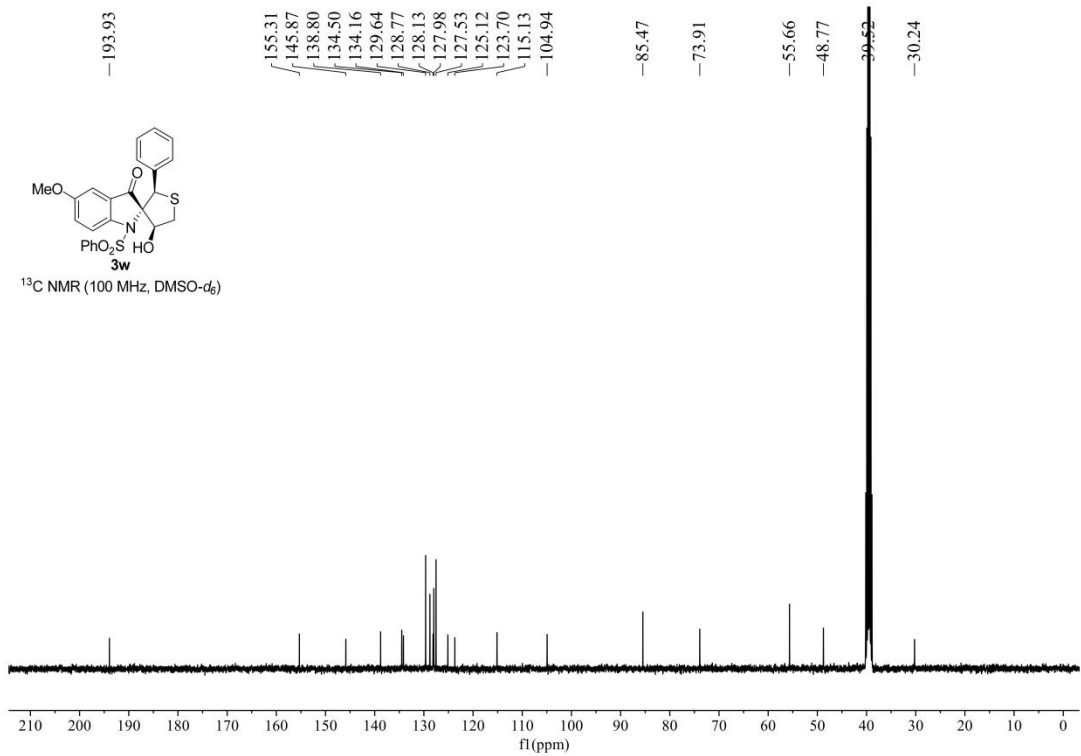

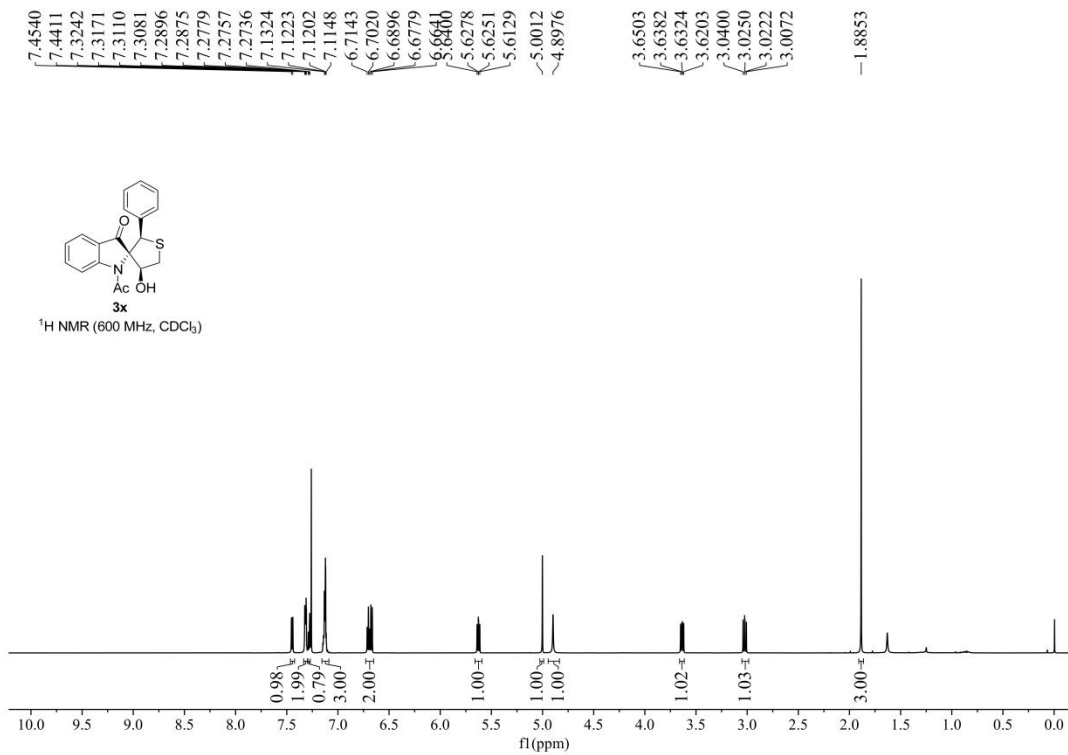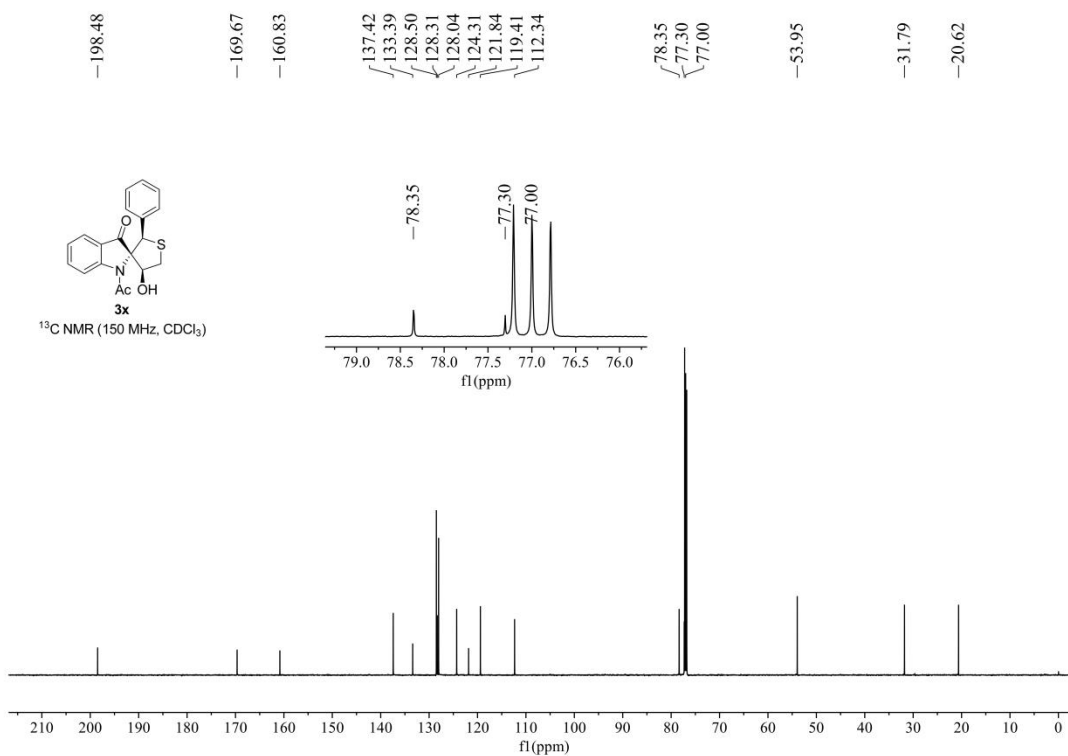

7.4642  
7.4513  
7.3415  
7.3394  
7.3257  
7.3160  
7.3138  
7.2707  
7.1235  
7.1194  
7.1161  
7.1082  
7.1052  
6.7500  
6.7381  
6.7249  
6.7222  
6.7085  
5.6259  
5.6136  
5.6111  
5.5988  
4.9558  
4.9045  
3.6536  
3.6414  
3.6355  
3.6233  
3.0405  
3.0256  
3.0225  
3.0076  
-1.8717

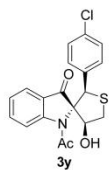

<sup>1</sup>H NMR (600 MHz, CDCl<sub>3</sub>)

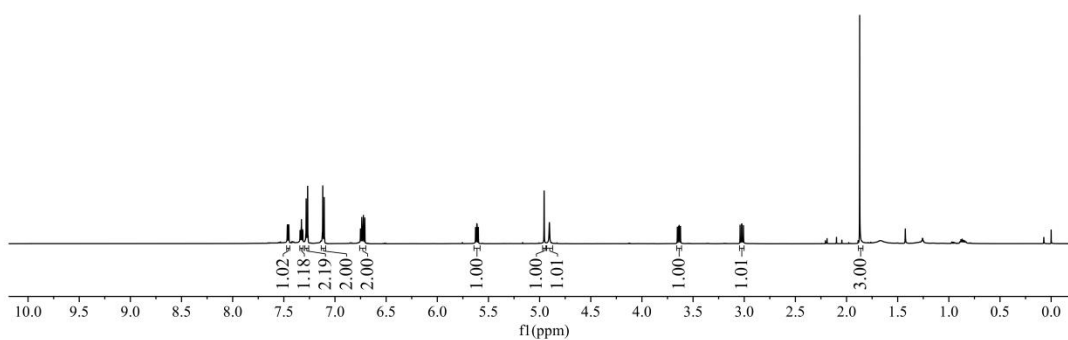

-198.18  
-169.55  
-160.70  
137.73  
134.06  
132.17  
130.00  
128.18  
124.40  
121.55  
119.59  
112.29  
78.26  
77.26  
77.00  
53.32  
31.91  
20.56

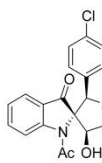

<sup>13</sup>C NMR (150 MHz, CDCl<sub>3</sub>)

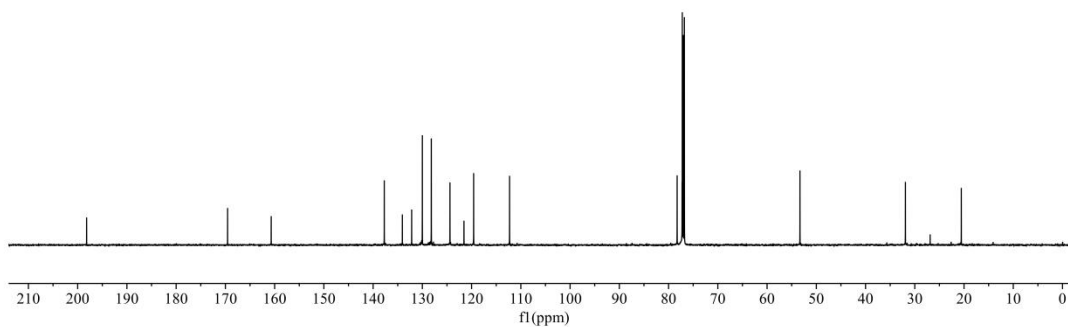



7.4649  
7.4519  
7.3455  
7.3432  
7.3337  
7.3294  
7.3201  
7.2742  
7.2738  
7.2712  
7.2642  
7.2160  
7.2152  
7.2048  
7.2019  
6.7558  
6.7434  
6.7311  
6.7232  
5.6747  
5.6026  
5.5998  
5.5877  
4.9340  
4.8580  
3.6498  
3.6376  
3.6317  
3.6195  
3.0321  
3.0173  
3.0140  
2.9992  
-1.8685

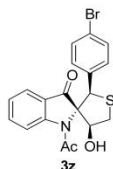

<sup>1</sup>H NMR (600 MHz, CDCl<sub>3</sub>)

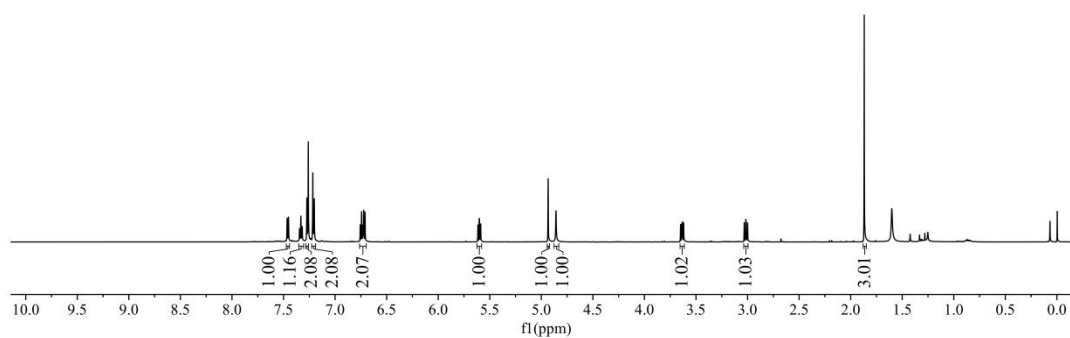

198.16  
169.54  
160.69  
137.76  
132.76  
131.15  
130.35  
124.43  
122.28  
121.57  
119.64  
112.32  
78.31  
77.12  
77.00  
53.36  
31.93  
20.57

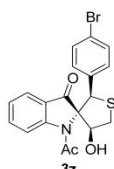

<sup>13</sup>C NMR (150 MHz, CDCl<sub>3</sub>)

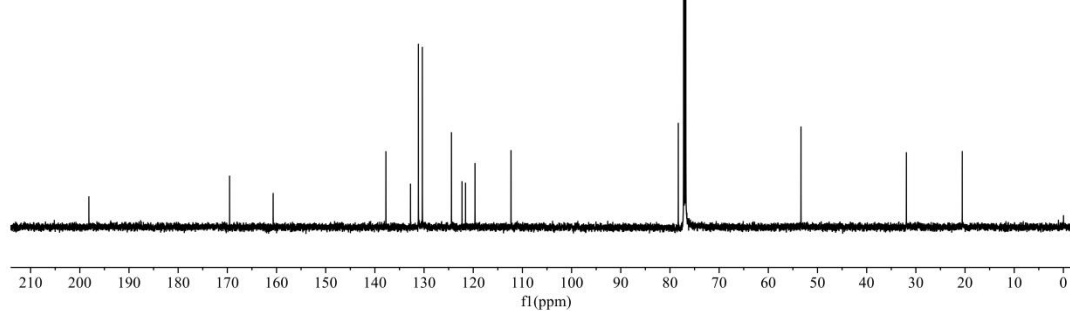

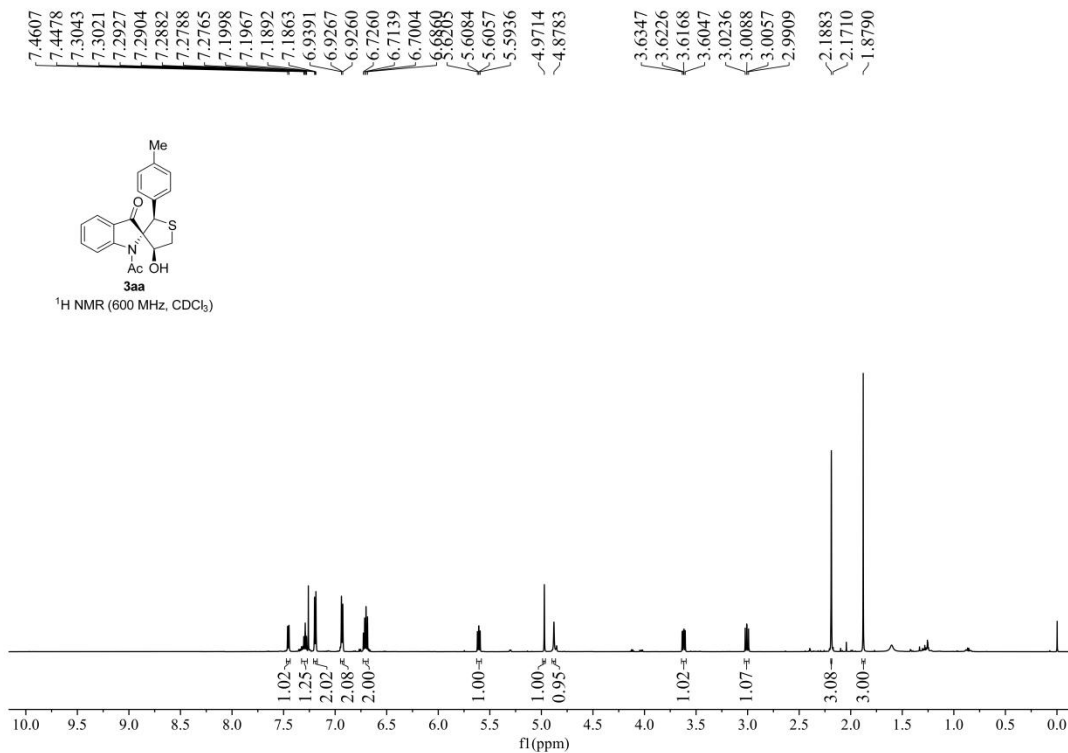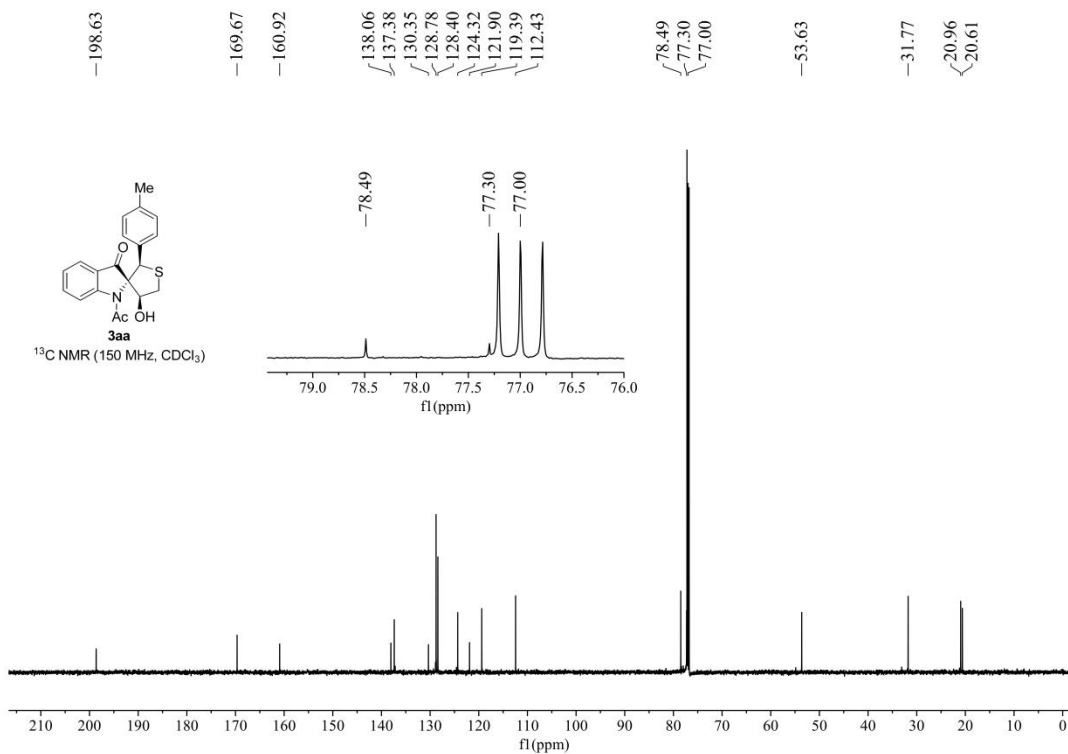

7.8577  
7.8556  
7.8538  
7.7490  
7.7453  
7.7386  
7.7339  
7.7013  
7.6898  
7.6861  
7.5863  
7.4661  
7.4643  
7.4628  
7.4531  
7.4515  
7.4500  
7.4240  
7.4171  
7.4126  
7.4081  
7.3759  
7.2176  
7.2153  
7.2058  
7.2015  
7.1922  
7.1898  
6.6750  
6.6737  
6.6620  
6.6502  
6.6243  
6.6105  
5.6793  
5.6674  
5.6647  
5.6528  
5.1745  
4.9086  
3.6996  
3.6877  
3.6816  
3.6697  
3.0982  
3.0835  
3.0803  
3.0656  
1.8928  
0.0000

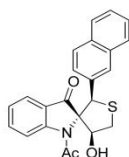

**3ab**

<sup>1</sup>H NMR (600 MHz, CDCl<sub>3</sub>)

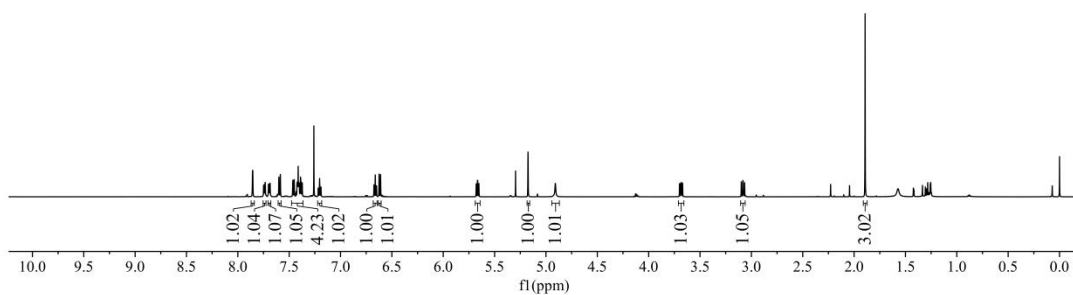

— 198.63

— 169.64

— 160.84

— 137.50

— 133.05

— 132.81

— 131.33

— 127.98

— 127.93

— 127.71

— 127.49

— 126.31

— 126.21

— 126.16

— 124.38

— 121.74

— 119.50

— 112.38

— 78.60

— 77.42

— 77.00

— 53.95

— 31.95

— 20.62

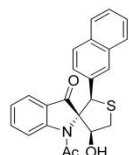

**3ab**

<sup>13</sup>C NMR (150 MHz, CDCl<sub>3</sub>)

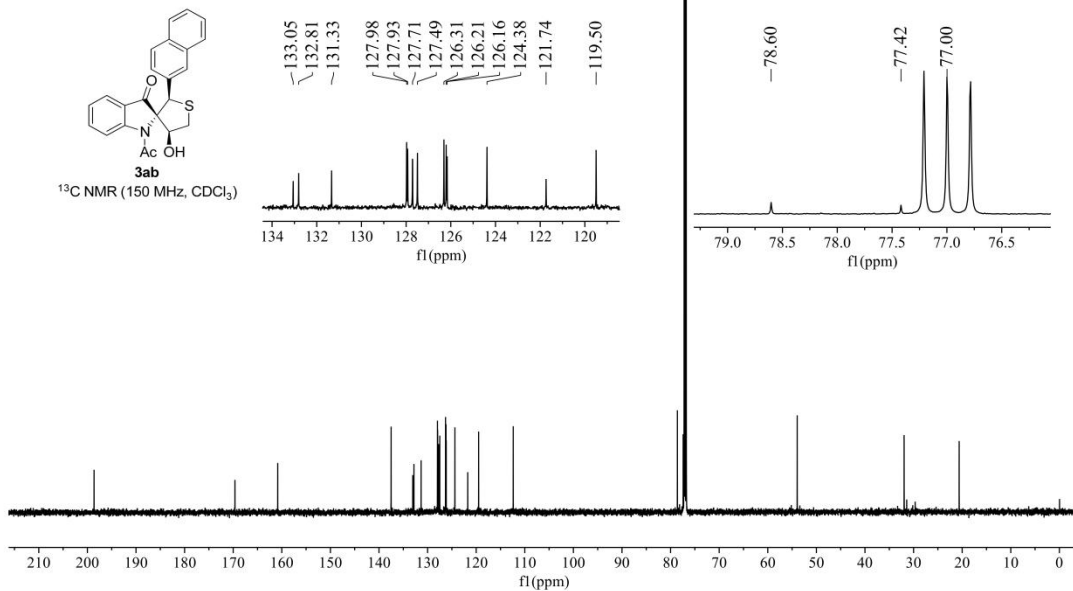

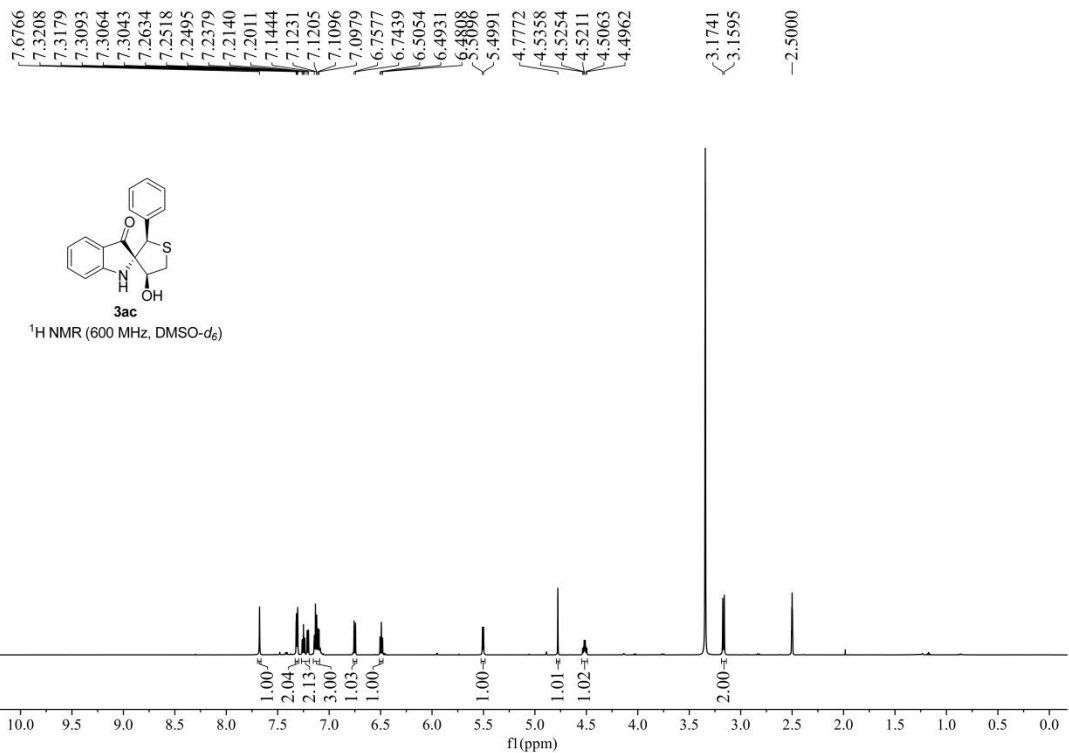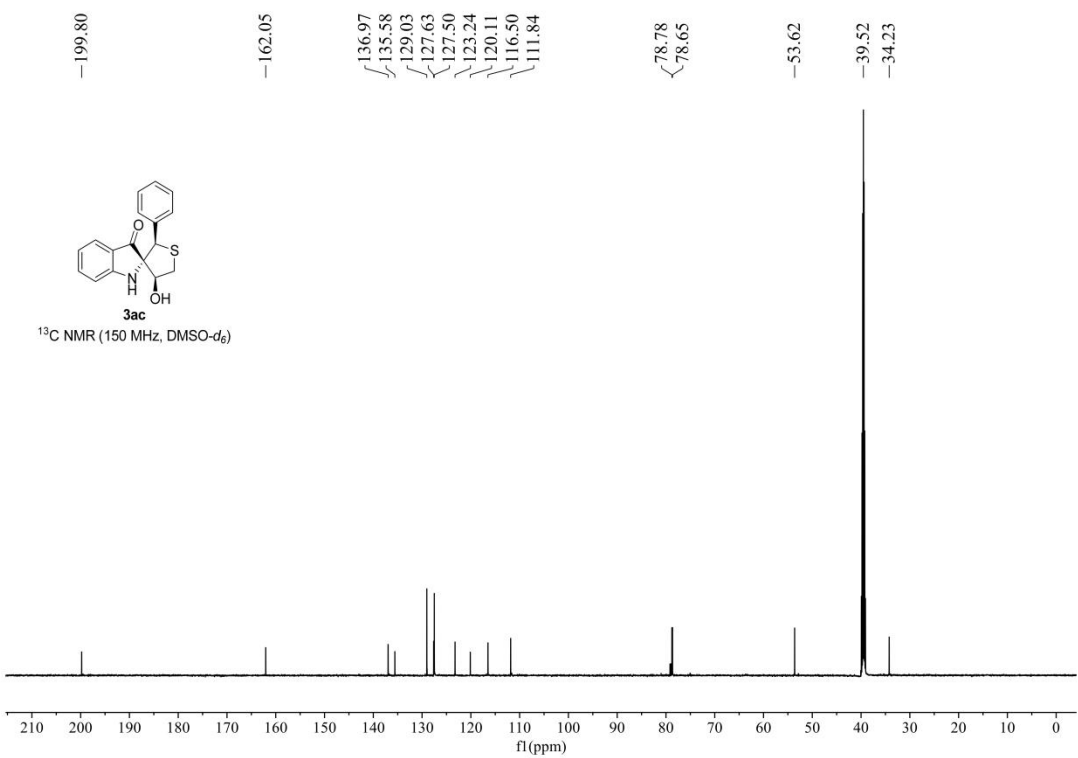

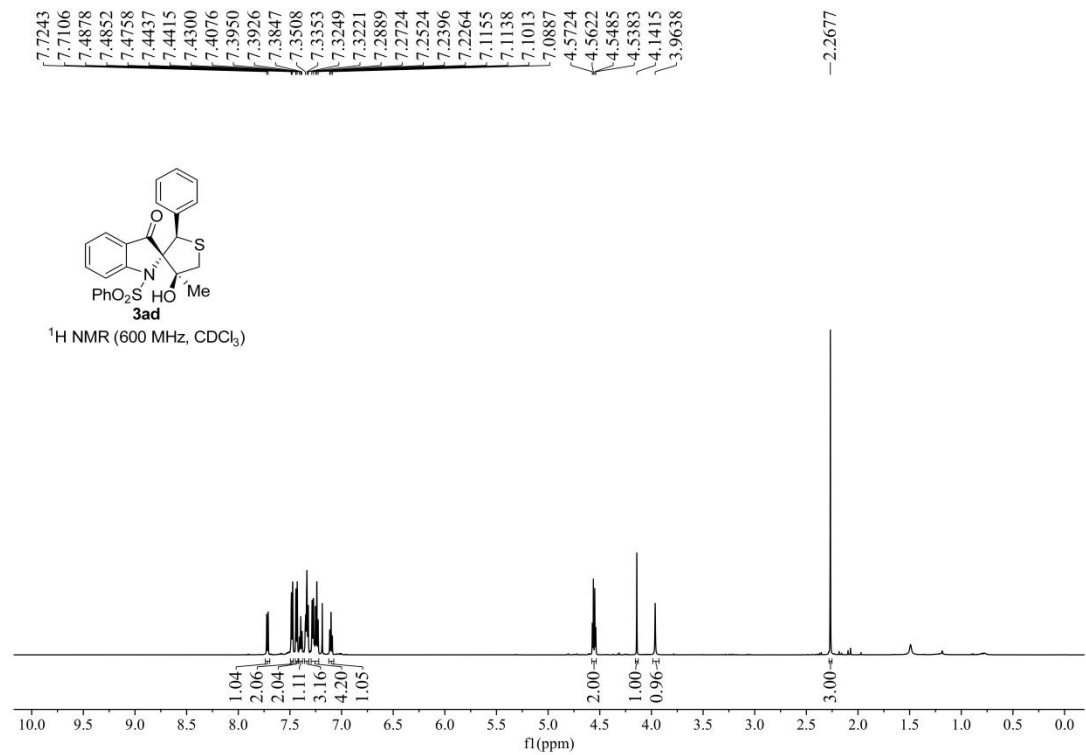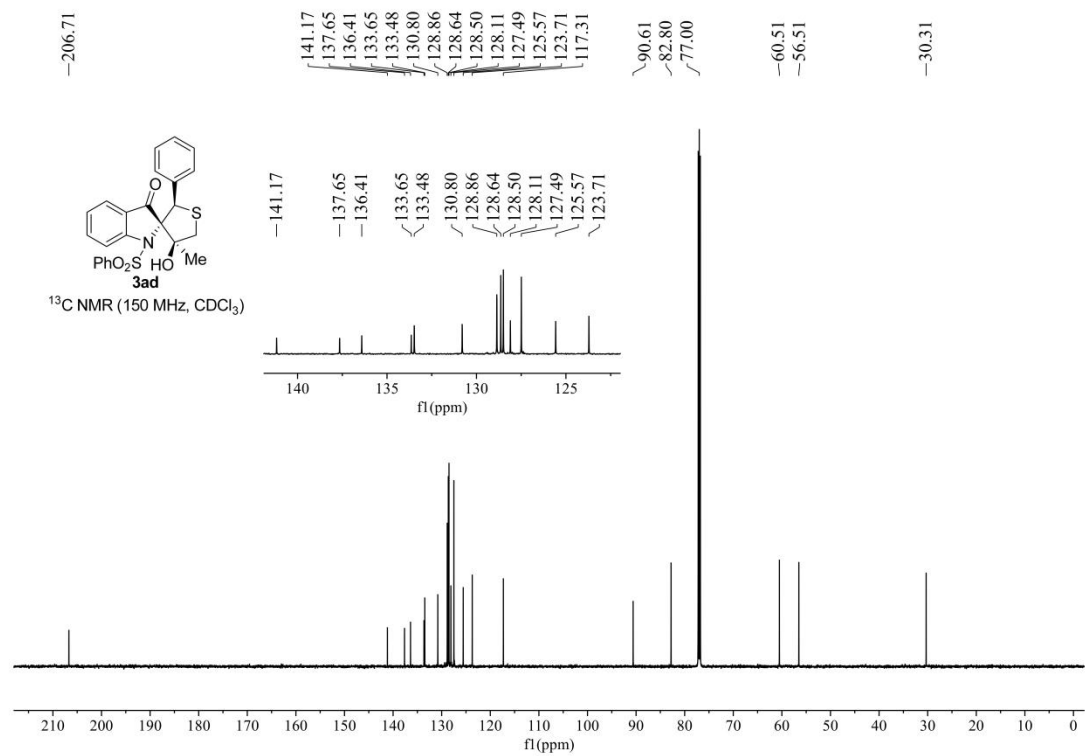

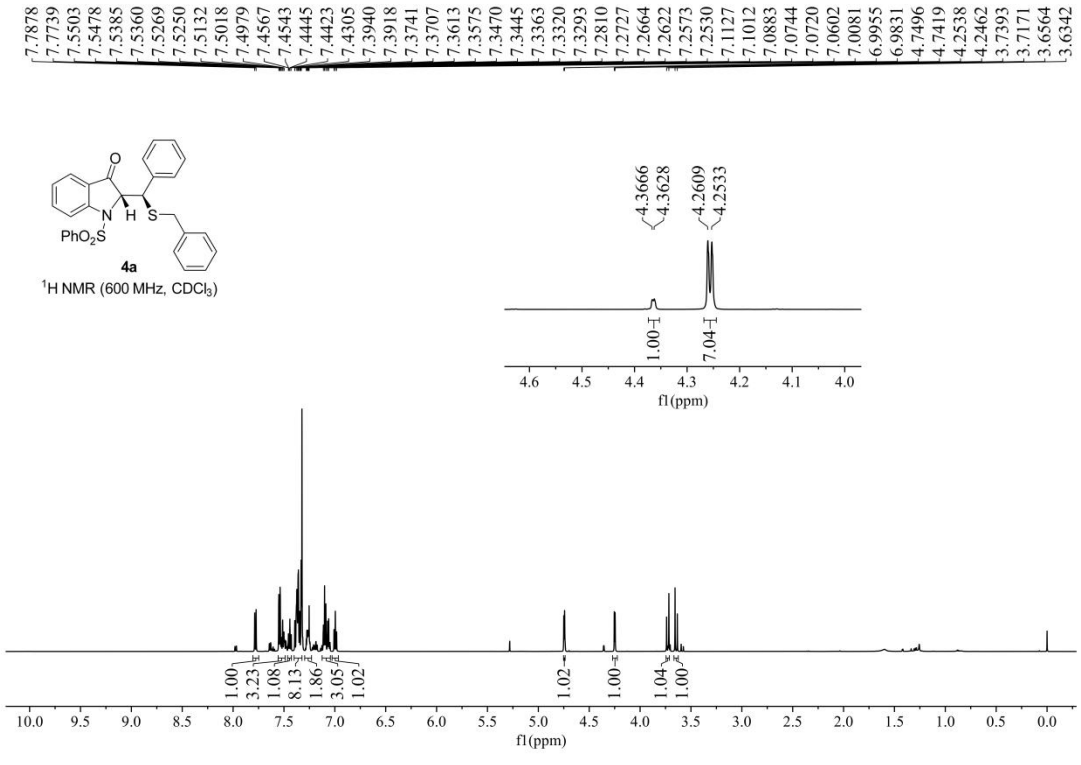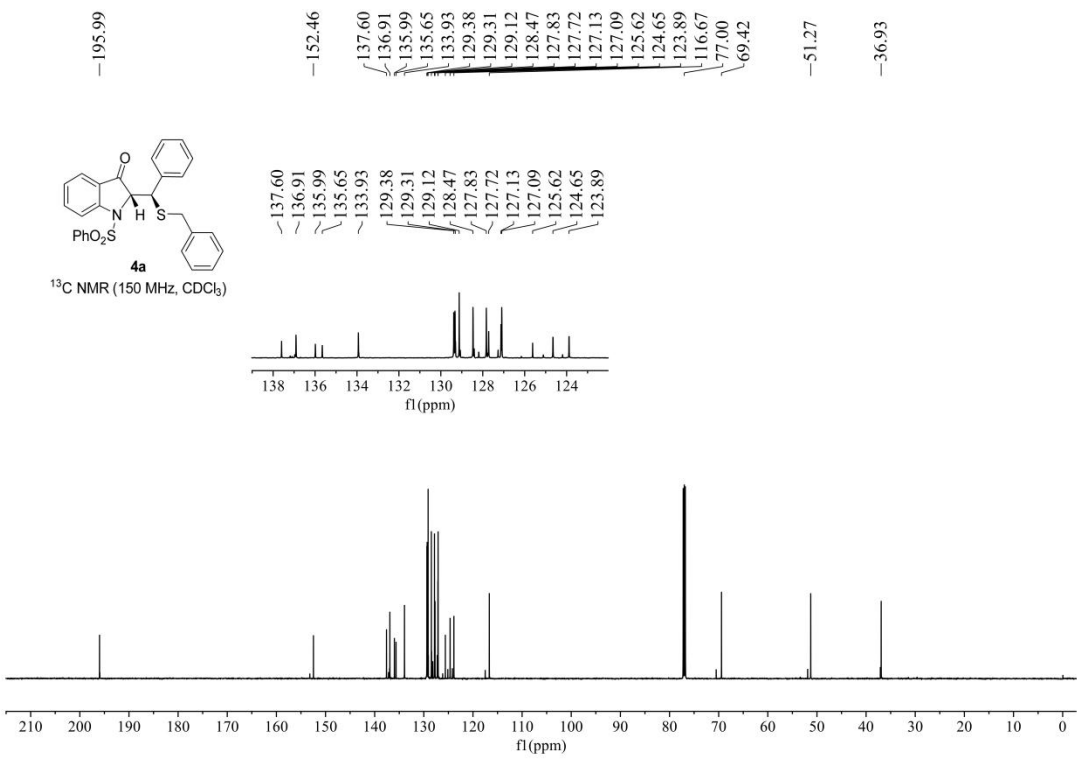

7.8162  
7.8023  
7.6988  
7.6849  
7.6822  
7.5636  
7.5557  
7.5536  
7.5435  
7.5411  
7.5307  
7.5285  
7.5119  
7.4995  
7.4746  
7.4722  
7.4604  
7.4582  
7.4462  
7.4138  
7.4027  
7.3996  
7.3869  
7.3801  
7.1053  
7.1029  
7.0913  
7.0811  
7.0572  
7.0549  
7.0452  
7.0165  
7.0040  
6.9918  
4.8419  
4.8346  
4.3757  
4.3682  
2.5611  
2.5489  
2.5409  
1.2842  
1.2718  
1.2594

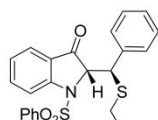

**4b**

$^1\text{H NMR}$  (600 MHz,  $\text{CDCl}_3$ )

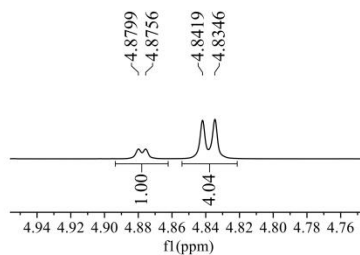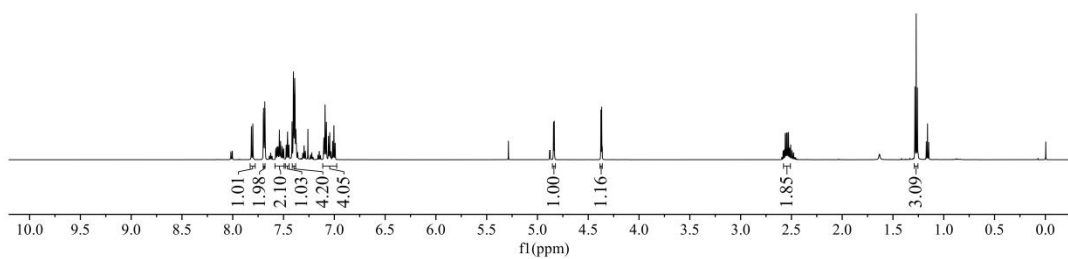

196.03  
152.40  
136.89  
136.04  
135.98  
134.01  
129.39  
129.23  
127.77  
127.10  
125.78  
124.70  
123.90  
116.69  
77.00  
69.53  
51.72  
26.79  
14.31

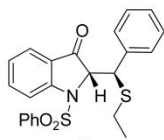

**4b**

$^{13}\text{C NMR}$  (150 MHz,  $\text{CDCl}_3$ )

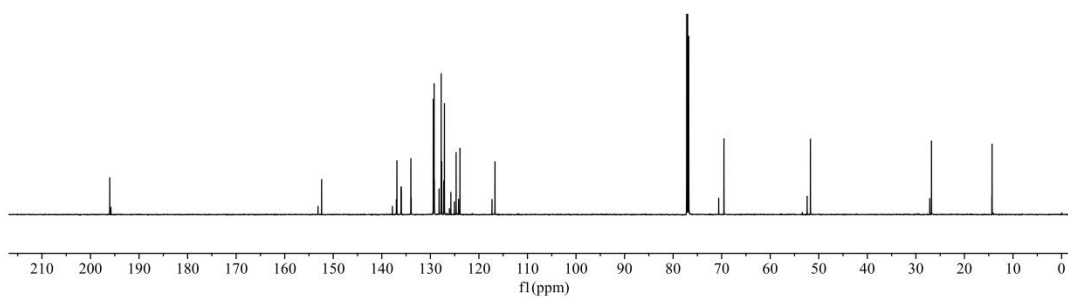

7.8075  
7.7935  
7.7432  
7.7409  
7.7340  
7.7288  
7.5632  
7.5508  
7.5483  
7.5403  
7.5383  
7.4780  
7.4672  
7.4651  
7.4532  
7.4509  
7.4316  
7.4288  
7.4191  
7.4176  
7.4086  
7.4049  
7.3960  
7.3865  
7.3806  
7.3725  
7.3703  
7.1140  
7.1113  
7.1027  
7.0898  
7.0765  
7.0741  
7.0647  
7.0281  
7.0267  
7.0151  
7.0032  
5.0460  
5.0382  
4.4701  
4.4623  
4.4480  
3.7010  
3.6509  
3.2899  
3.2650  
3.1965  
3.1717

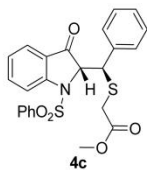

<sup>1</sup>H NMR (600 MHz, CDCl<sub>3</sub>)

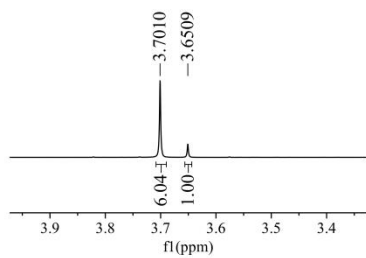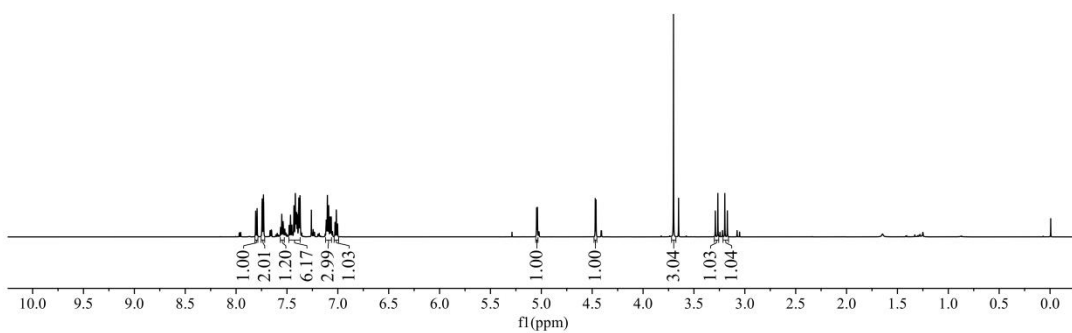

195.90  
170.44  
152.53  
137.04  
135.96  
134.88  
134.05  
129.42  
129.37  
127.98  
127.88  
127.23  
125.53  
124.73  
123.94  
116.68  
77.00  
68.95  
52.42  
52.18  
34.02

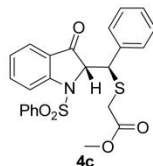

<sup>13</sup>C NMR (150 MHz, CDCl<sub>3</sub>)

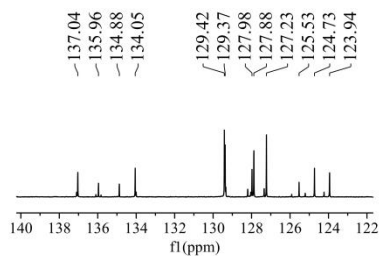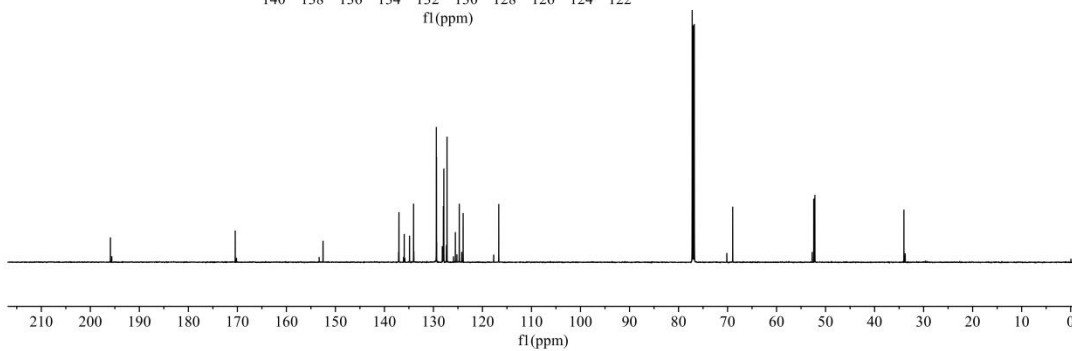



7.8195  
7.8054  
7.5468  
7.5347  
7.5322  
7.5119  
7.4993  
7.4872  
7.4850  
7.4758  
7.4728  
7.4614  
7.4590  
7.4072  
7.4049  
7.3943  
7.3921  
7.3590  
7.3461  
7.3362  
7.3328  
7.3294  
7.3170  
7.3092  
7.3050  
7.2974  
7.2943  
7.2830  
7.2730  
7.2705  
7.2670  
7.2634  
7.2578  
7.2527  
7.2472  
7.2298  
7.2263  
7.2188  
7.2155  
7.0315  
7.0190  
7.0065  
4.7132  
4.7056  
4.2311  
3.7195  
3.6971  
3.6191  
3.5967

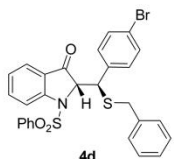

<sup>1</sup>H NMR (600 MHz, CDCl<sub>3</sub>)

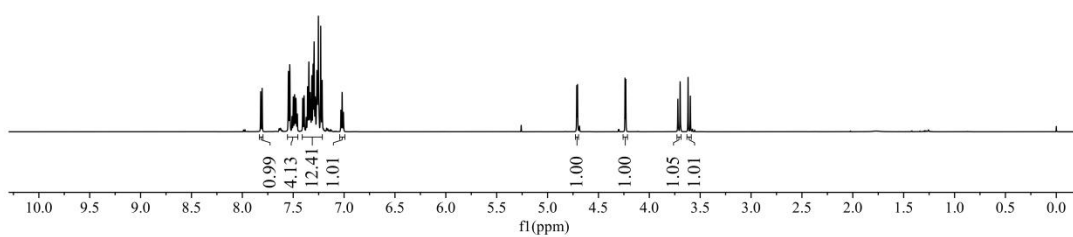

195.56  
152.38  
137.22  
137.18  
135.63  
134.99  
134.99  
133.96  
131.02  
130.90  
129.28  
129.00  
128.42  
127.14  
127.02  
125.22  
124.82  
123.90  
121.66  
116.60  
77.00  
69.16  
50.31  
36.86

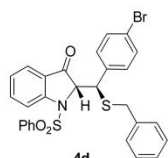

<sup>13</sup>C NMR (150 MHz, CDCl<sub>3</sub>)

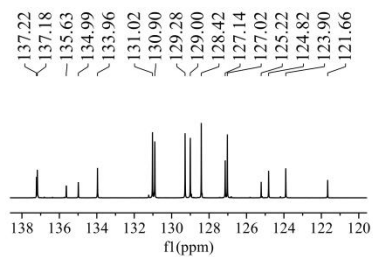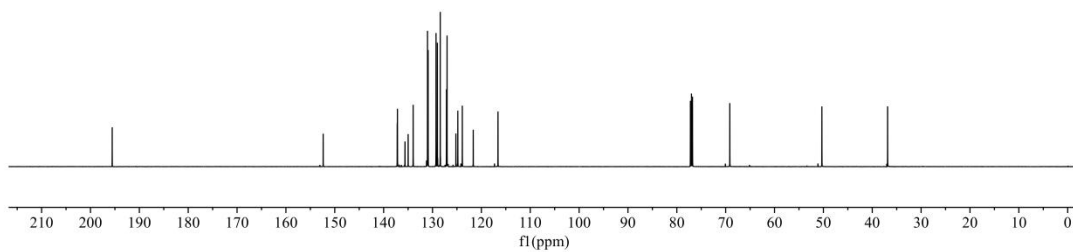

7.6666  
7.6521  
7.6031  
7.5690  
7.5565  
7.4409  
7.4314  
7.4256  
7.4132  
7.3814  
7.3694  
7.3568  
7.2057  
7.1942  
7.1809  
7.1515  
7.1393  
6.9604  
6.9479  
6.9355  
6.8664  
6.8528  
6.8337  
6.8055  
6.7892  
4.4596  
4.4517  
4.4485  
4.4398

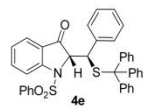

<sup>1</sup>H NMR (600 MHz, CDCl<sub>3</sub>)

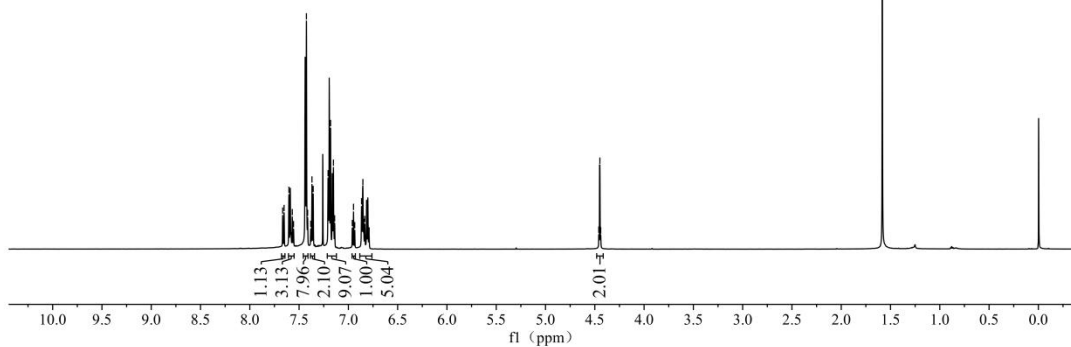

196.72  
152.36  
144.29  
136.81  
136.52  
136.48  
133.89  
130.04  
129.43  
129.33  
127.72  
127.07  
126.99  
126.69  
126.62  
125.78  
124.43  
123.82  
116.43  
69.73  
69.27  
50.90

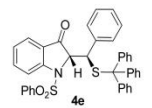

<sup>13</sup>C NMR (150 MHz, CDCl<sub>3</sub>)

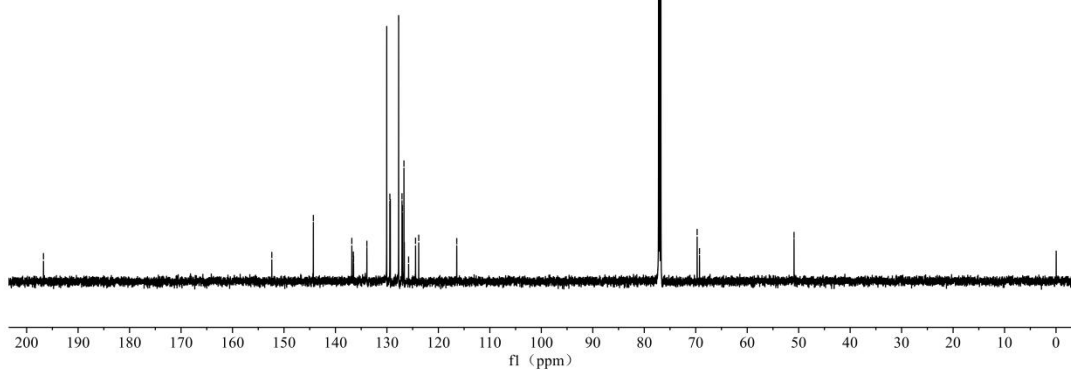

7.7328  
7.7187  
7.6801  
7.6734  
7.6638  
7.6601  
7.5998  
7.5881  
7.5775  
7.5718  
7.4847  
7.4678  
7.4548  
7.4422  
7.4417  
7.4290  
7.4288  
7.4286  
7.4166  
7.4163  
7.3919  
7.3788  
7.2152  
7.2125  
7.2010  
7.1978  
7.1880  
7.1743  
7.1625  
7.1504  
7.0046  
6.9921  
6.9796  
6.9329  
6.9186  
6.7369  
6.7243  
6.7221  
6.7178  
4.5747  
4.5642  
4.5598  
4.5562  
4.4683  
4.4603  
4.4577

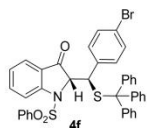

<sup>1</sup>H NMR (600 MHz, CDCl<sub>3</sub>)

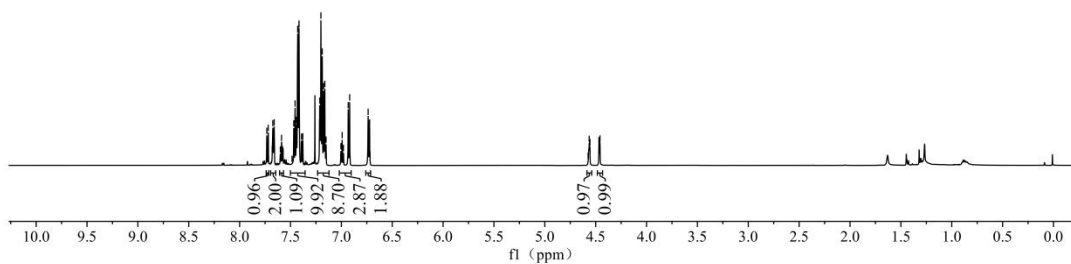

— 196.36  
— 152.38  
— 144.01  
— 137.21  
— 136.20  
— 135.75  
— 134.04  
— 131.10  
— 129.99  
— 129.92  
— 129.41  
— 127.75  
— 127.09  
— 126.76  
— 125.36  
— 124.72  
— 123.94  
— 120.62  
— 116.43  
— 77.00  
— 69.58  
— 69.21  
— 50.05

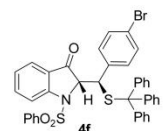

<sup>13</sup>C NMR (150 MHz, CDCl<sub>3</sub>)

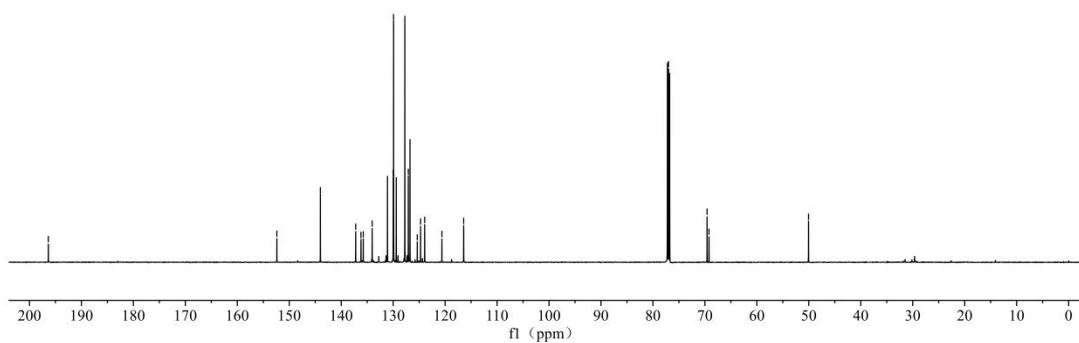

8.0278  
8.0252  
8.0070  
8.0034  
7.6188  
7.6000  
7.5583  
7.5453  
7.5426  
7.5243  
7.4991  
7.4804  
7.4782  
7.3807  
7.3628  
7.3548  
7.3418  
7.3353  
7.3335  
7.1215  
7.1068  
7.1046  
7.0868  
7.0851  
7.0772  
7.0602  
6.9061  
6.9040  
6.8868  
6.8846  
6.8689  
6.4817  
6.4616  
6.4587  
6.4383  
6.3288  
6.3258  
6.3056  
5.7058  
5.7020  
4.1836  
4.1599  
4.1441  
4.1362  
4.1204  
4.0967  
3.3368  
3.3165  
3.2922

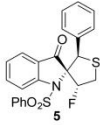

<sup>1</sup>H NMR (400 MHz, CDCl<sub>3</sub>)

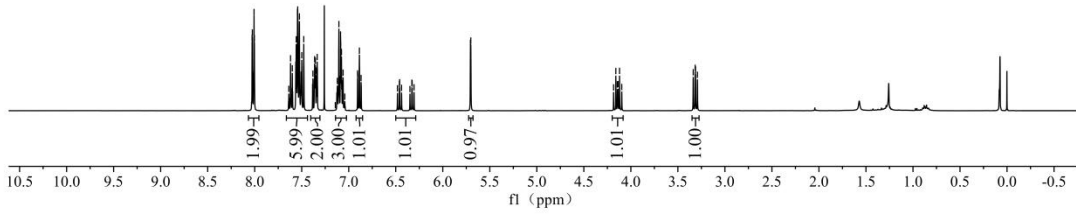

151.72  
139.41  
136.86  
133.94  
133.05  
129.49  
129.08  
128.39  
128.04  
127.05  
124.13  
123.42  
122.87  
114.13  
92.19  
90.26  
82.96  
82.75  
48.88  
48.81  
27.71  
27.49

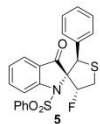

<sup>13</sup>C NMR (100 MHz, CDCl<sub>3</sub>)

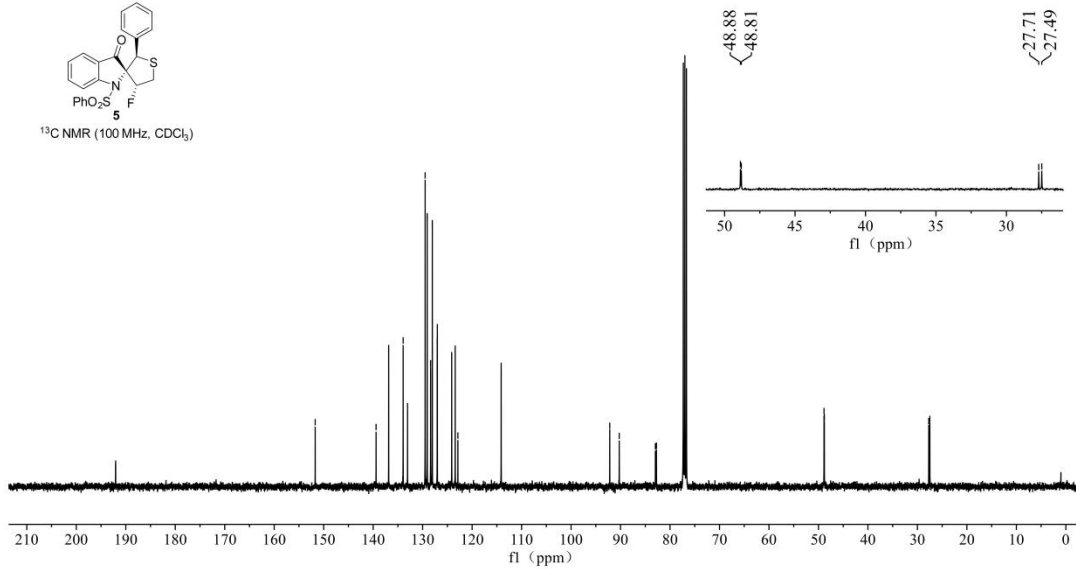

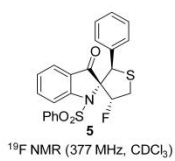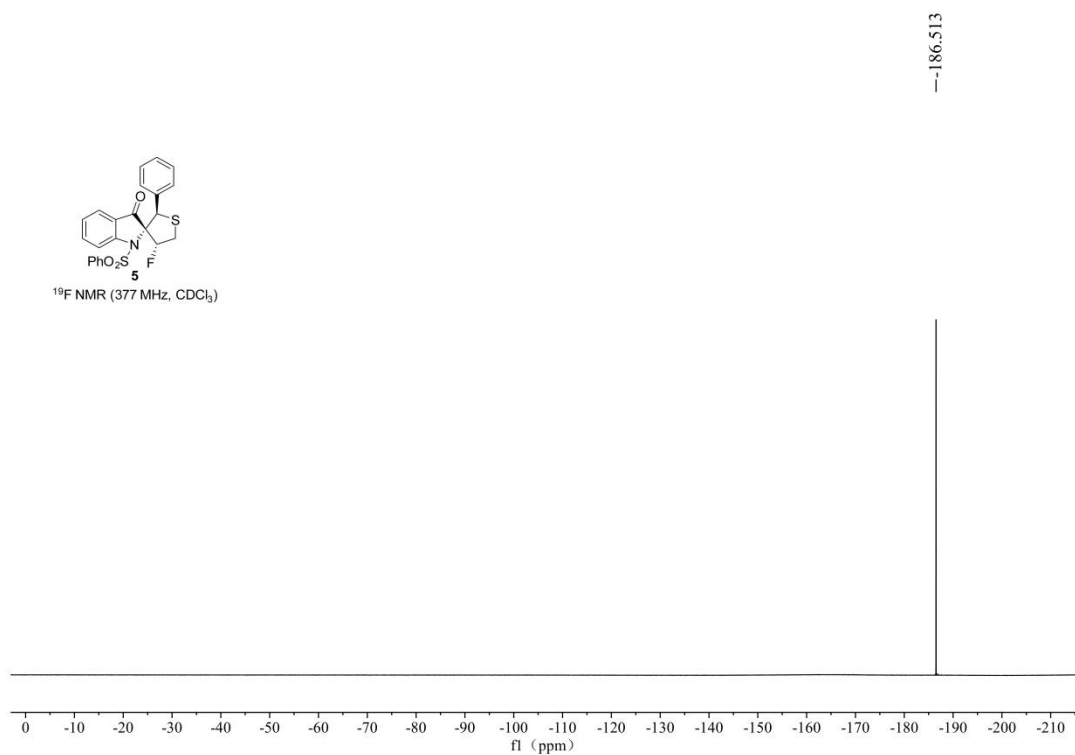

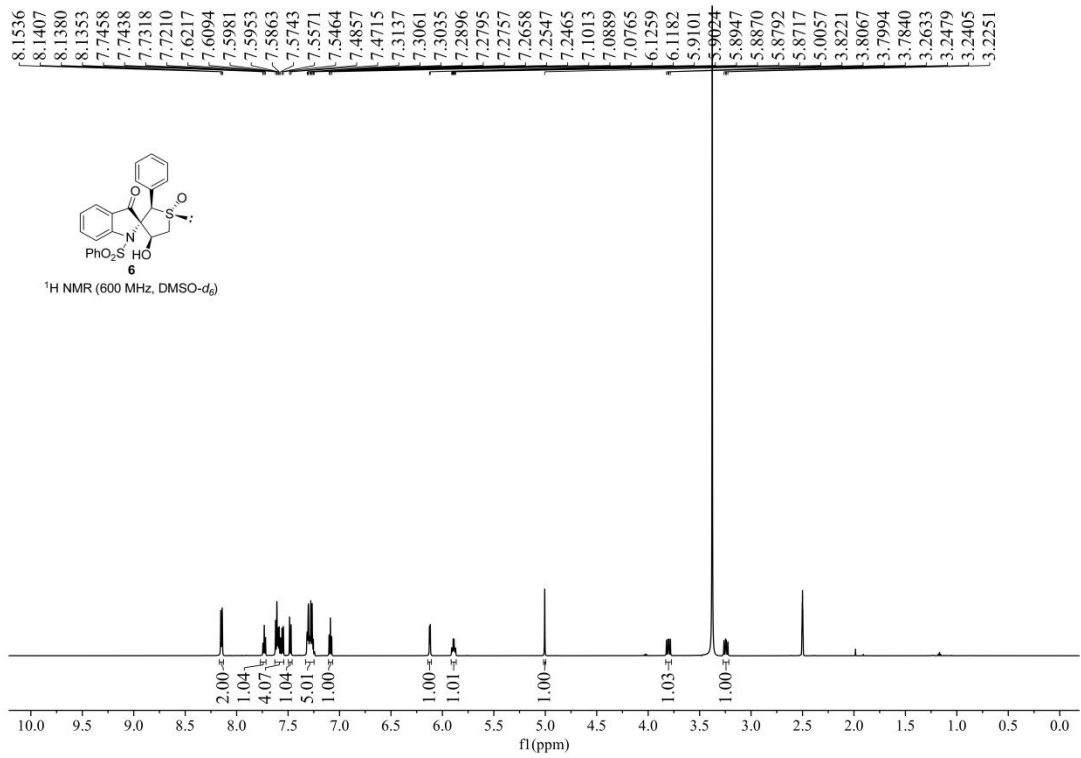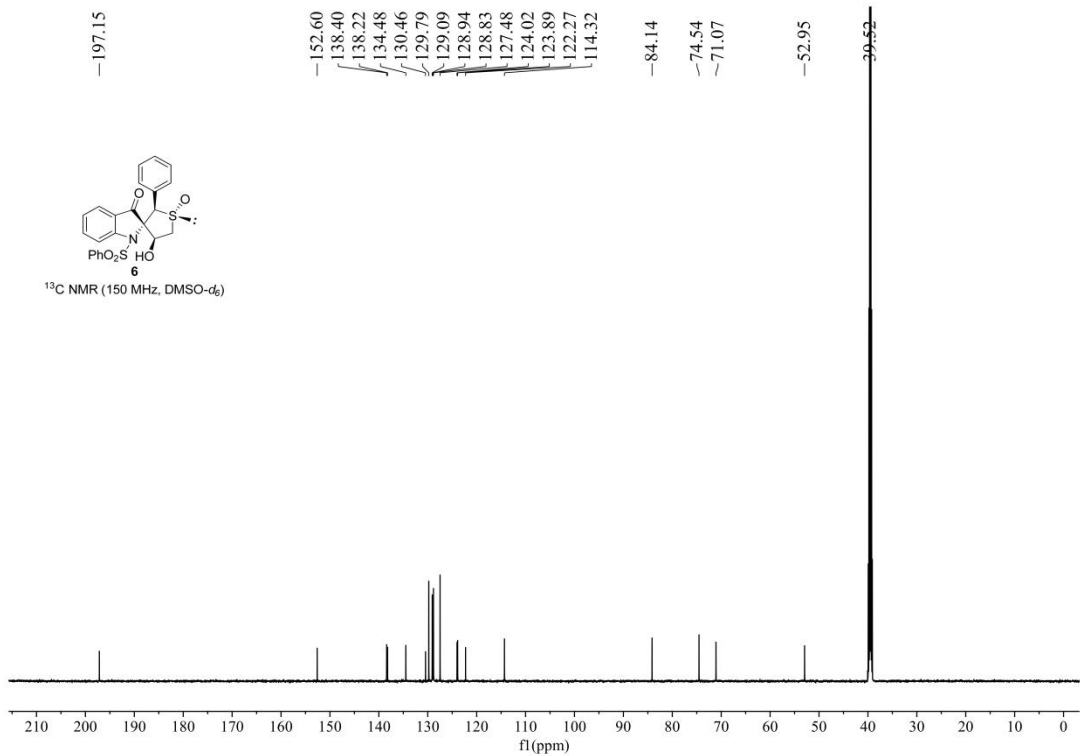

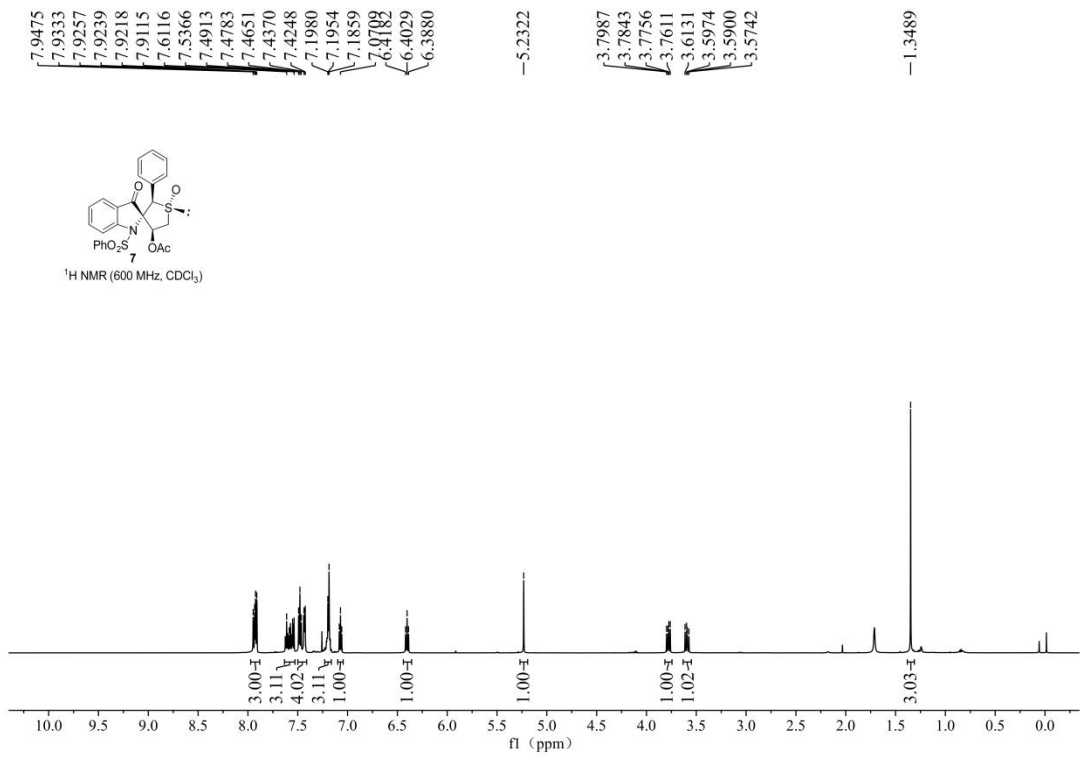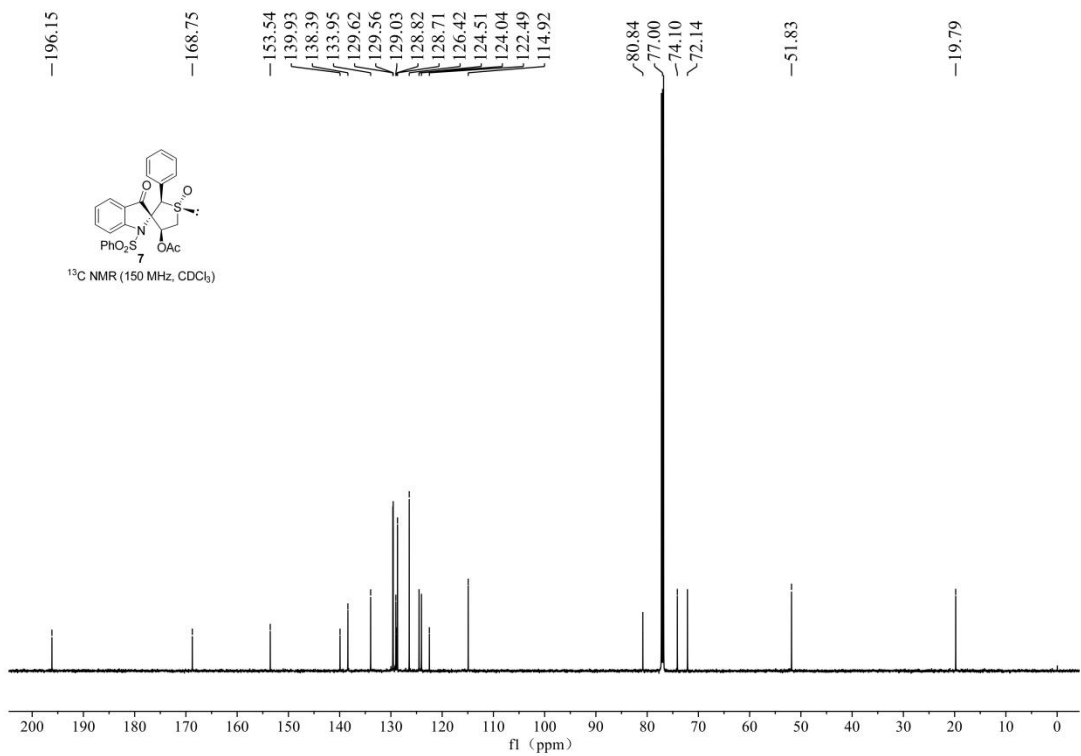

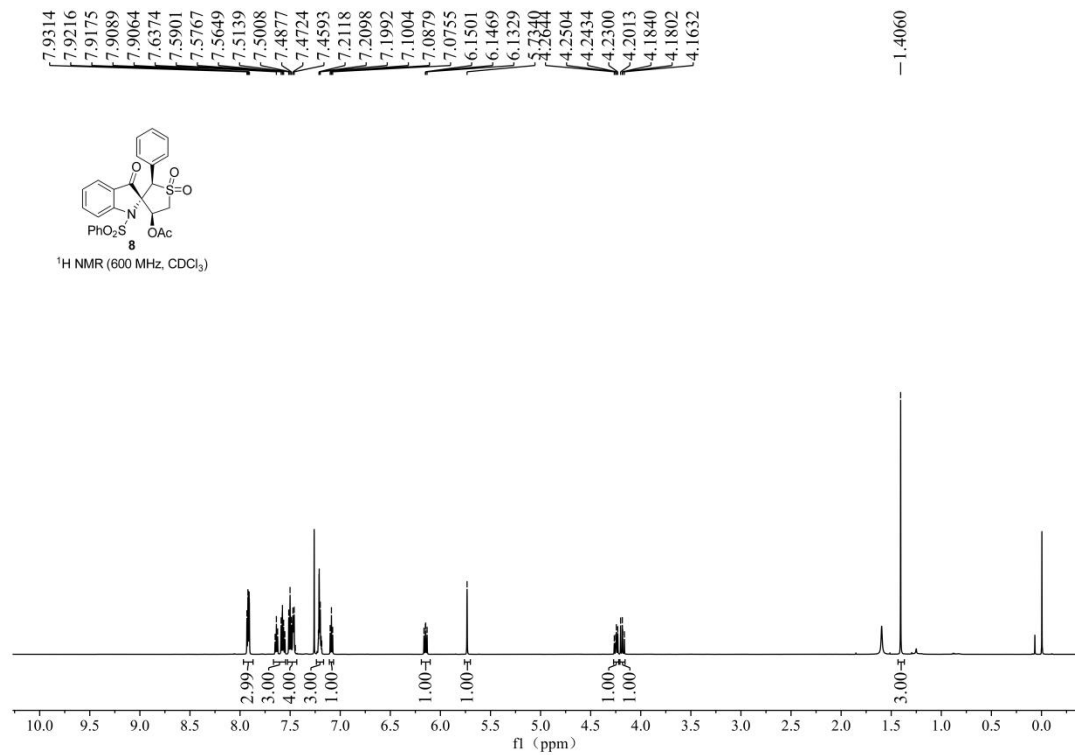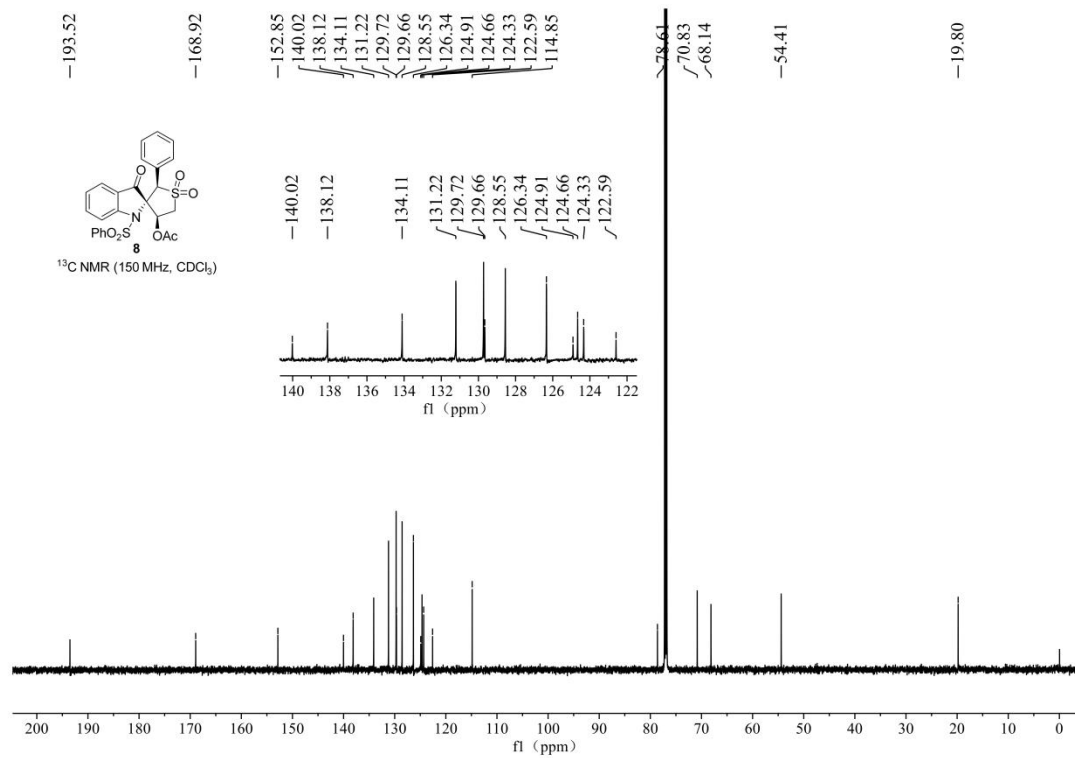



7.9701  
7.9559  
7.9433  
7.9414  
7.9291  
7.6223  
7.6124  
7.6098  
7.5993  
7.5954  
7.5614  
7.5590  
7.5493  
7.5469  
7.5351  
7.5327  
7.5012  
7.4990  
7.4888  
7.4870  
7.4776  
7.4746  
7.4107  
7.4061  
7.4001  
7.3975  
7.3919  
7.3874  
7.2274  
7.2240  
7.2164  
7.2132  
7.0291  
7.0279  
7.0161  
7.0040  
7.0029  
6.0763  
6.0633  
6.0612  
6.0482  
5.7437  
3.6448  
3.6289  
3.6133  
3.5637  
3.5506  
3.5342  
1.3439

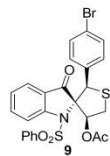

<sup>1</sup>H NMR (600 MHz, CDCl<sub>3</sub>)

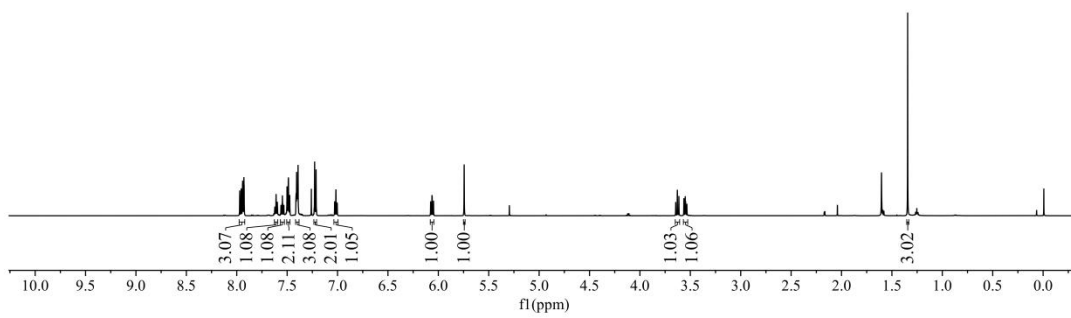

-192.83  
-169.37  
-152.11  
-140.16  
-137.34  
-133.80  
-132.39  
-131.15  
-130.77  
-129.52  
-126.44  
-124.25  
-123.83  
-123.06  
-122.37  
-114.58  
-81.96  
-77.00  
-74.84  
-48.36  
-27.73  
-20.11

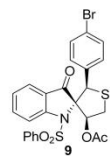

<sup>13</sup>C NMR (150 MHz, CDCl<sub>3</sub>)

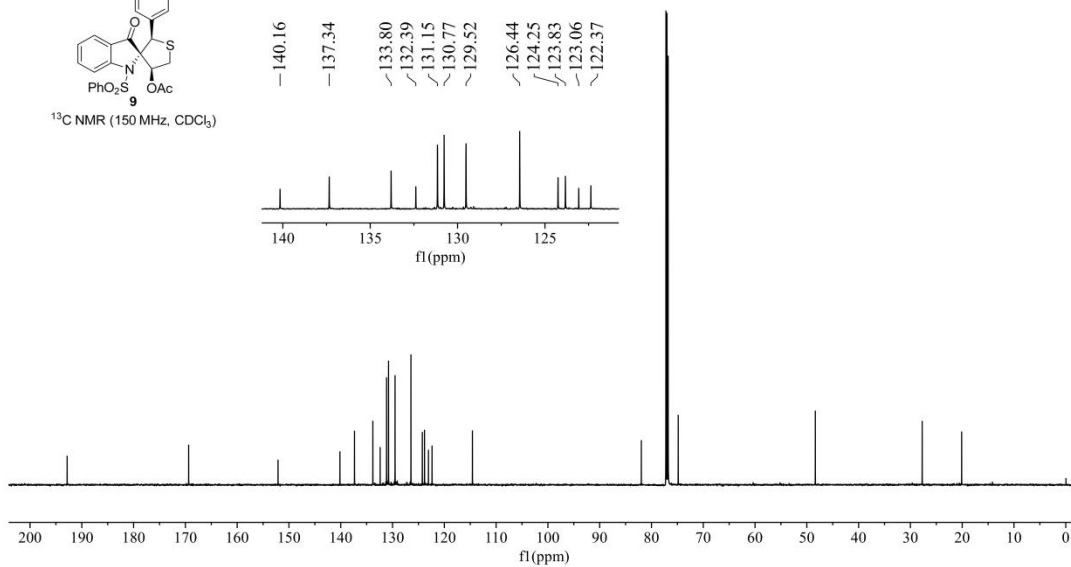

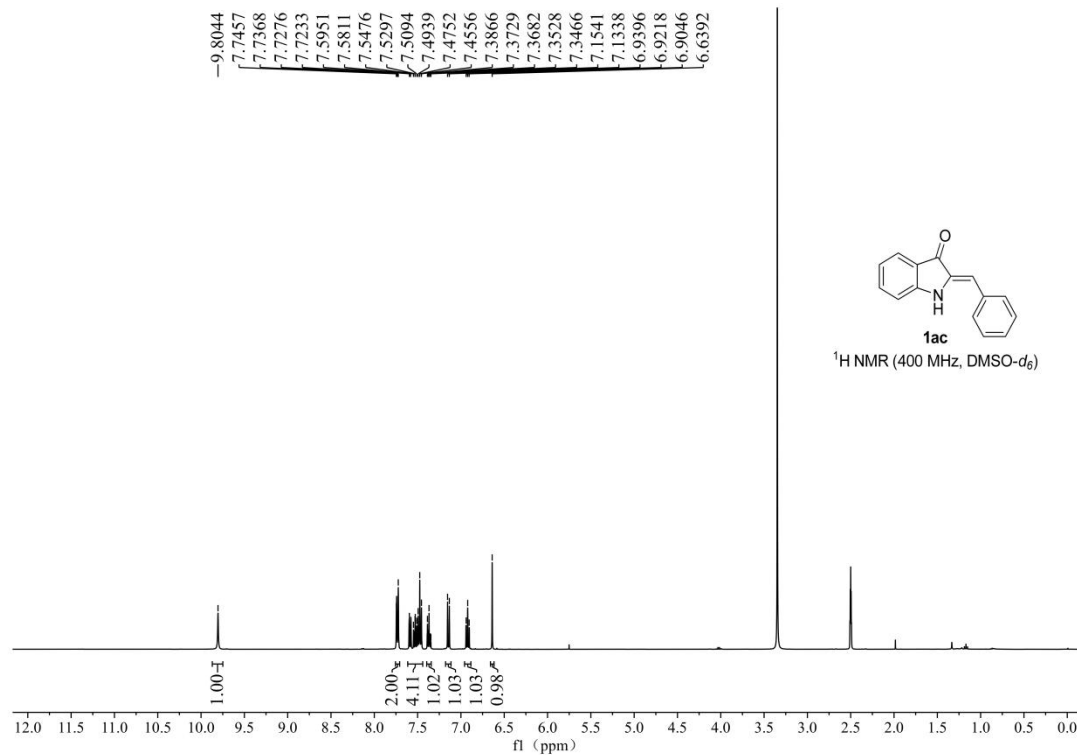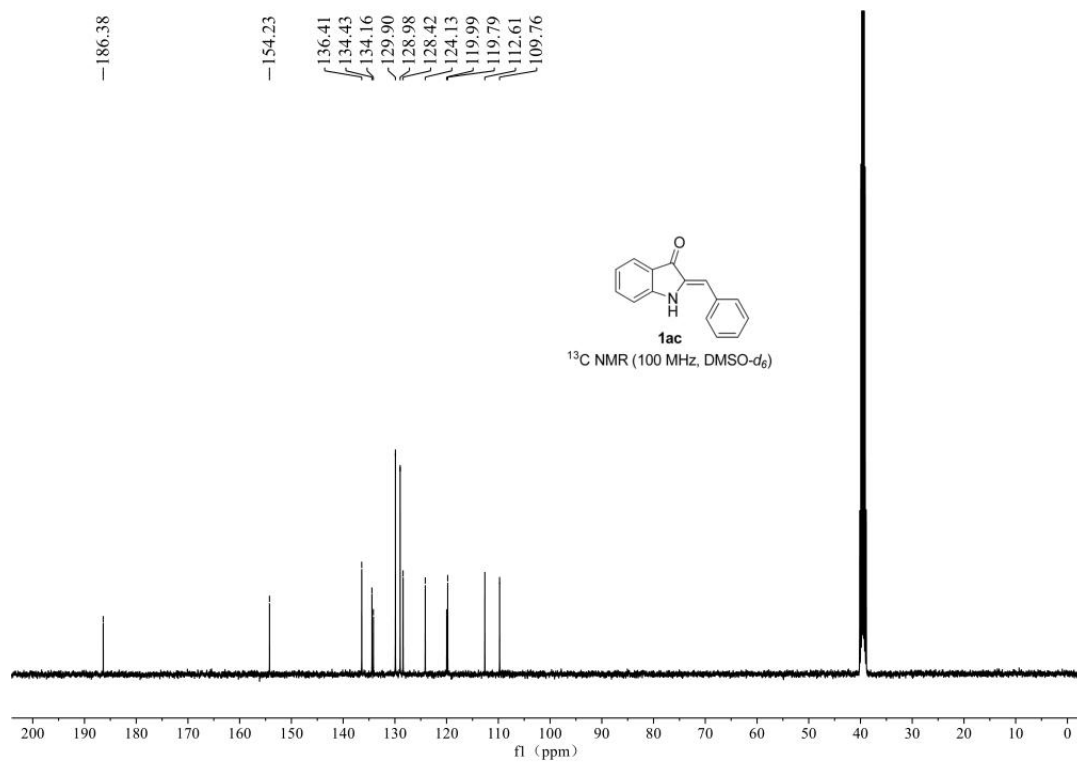

### 13. HPLC chromatograms

The **enantiomeric excess** was determined by HPLC with an IC-H column (*n*-hexane/*i*-PrOH = 90/10, flow rate 1.0 mL/min,  $\lambda = 254$  nm),  $t_R = 12.380$  min (major),  $t_R = 13.966$  min (minor), 98% ee.

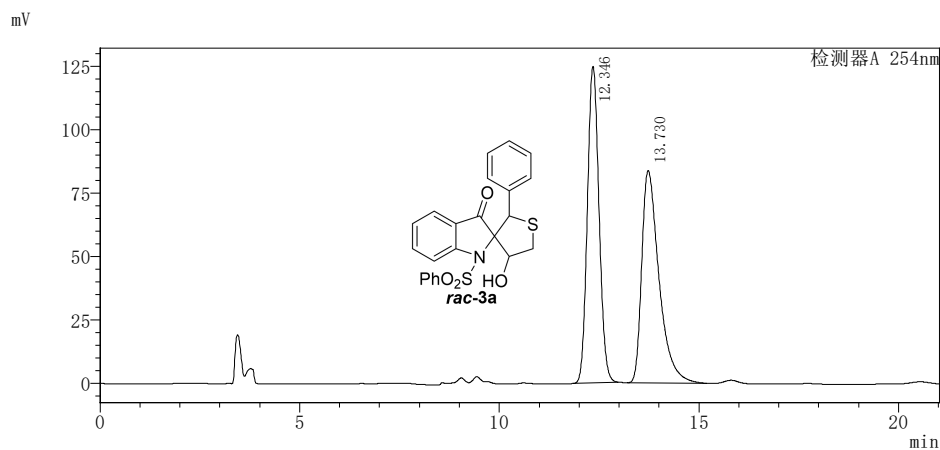

| Peak | Processed Channel | Retention Time (min) | Peak Area (mAU*s) | Peak Hight (mAU) | Peak Area (%) |
|------|-------------------|----------------------|-------------------|------------------|---------------|
| 1    | PDA 254 nm        | 12.346               | 2518793           | 124841           | 50.042        |
| 2    | PDA 254 nm        | 13.730               | 2514555           | 83752            | 49.958        |

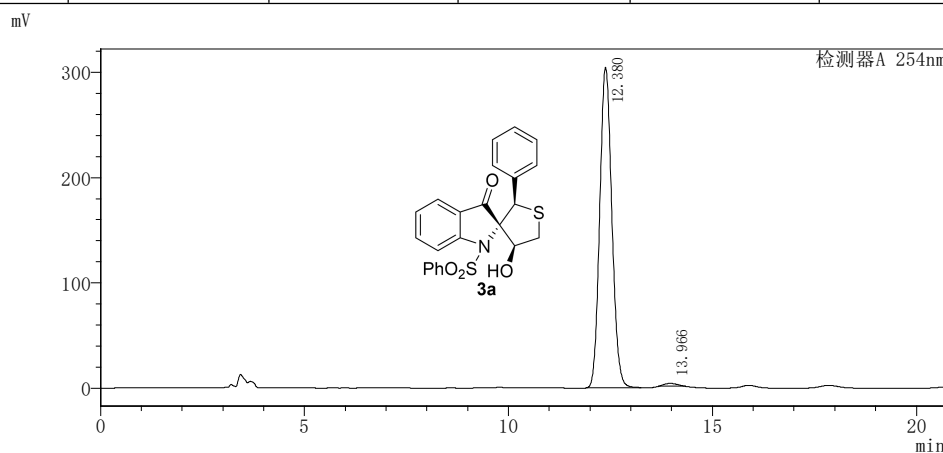

| Peak | Processed Channel | Retention Time (min) | Peak Area (mAU*s) | Peak Hight (mAU) | Peak Area (%) |
|------|-------------------|----------------------|-------------------|------------------|---------------|
| 1    | PDA 254 nm        | 12.380               | 6281014           | 304712           | 99.023        |
| 2    | PDA 254 nm        | 13.966               | 61963             | 2727             | 0.977         |

**1a' (E)** replaces **1a (Z)** to synthesize **3a** under standard conditions: the **enantiomeric excess** was determined by HPLC with an IC-H column (*n*-hexane/*i*-PrOH = 90/10, flow rate 1.0 mL/min,  $\lambda = 254$  nm),  $t_R = 12.369$  min (major),  $t_R = 13.886$  min (minor), 79% ee.

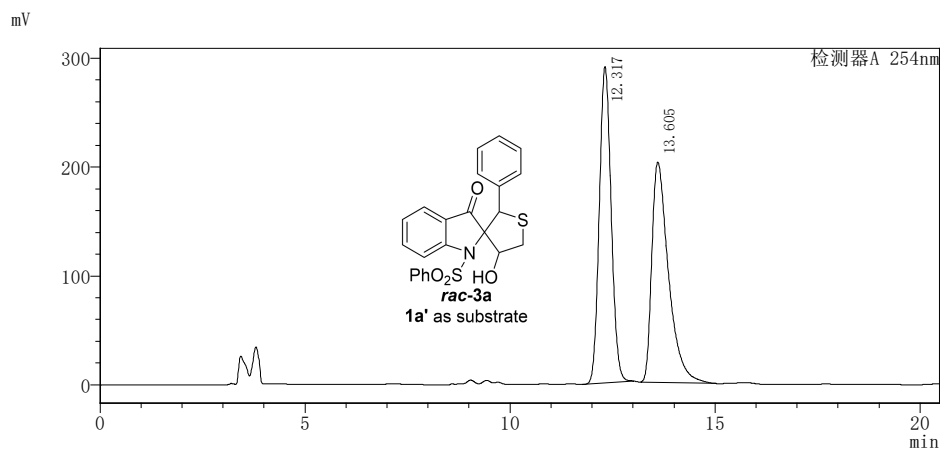

| Peak | Processed Channel | Retention Time (min) | Peak Area (mAU*s) | Peak Hight (mAU) | Peak Area (%) |
|------|-------------------|----------------------|-------------------|------------------|---------------|
| 1    | PDA 254 nm        | 12.317               | 5836523           | 290657           | 50.434        |
| 2    | PDA 254 nm        | 13.605               | 5736172           | 202180           | 49.566        |

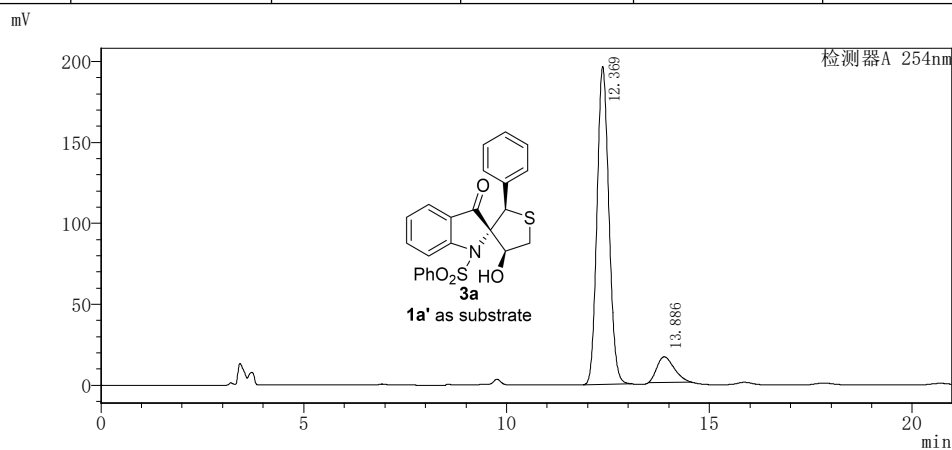

| Peak | Processed Channel | Retention Time (min) | Peak Area (mAU*s) | Peak Hight (mAU) | Peak Area (%) |
|------|-------------------|----------------------|-------------------|------------------|---------------|
| 1    | PDA 254 nm        | 12.369               | 3993972           | 196454           | 89.603        |
| 2    | PDA 254 nm        | 13.886               | 463431            | 15730            | 10.397        |

The **enantiomeric excess** was determined by HPLC with an IC-H column (*n*-hexane/*i*-PrOH = 90/10, flow rate 1.0 mL/min,  $\lambda = 254$  nm),  $t_R = 18.195$  min (major),  $t_R = 20.947$  min (minor), 99% ee.

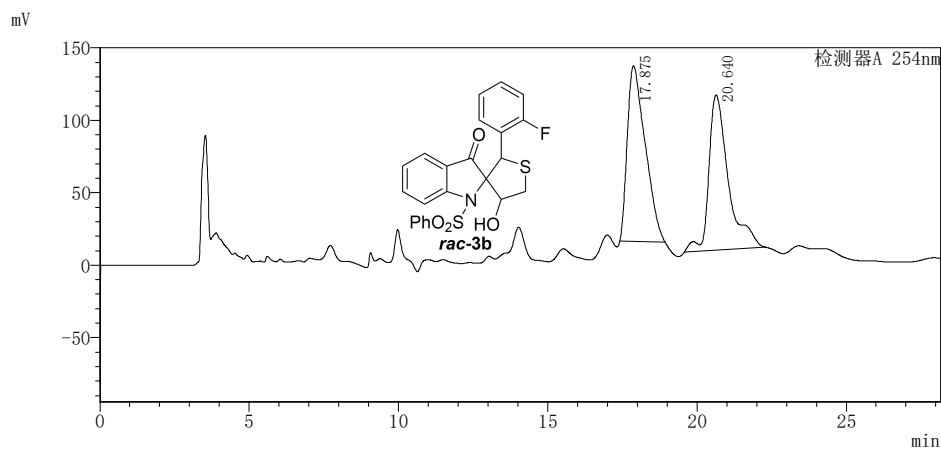

| Peak | Processed Channel | Retention Time (min) | Peak Area (mAU*s) | Peak Hight (mAU) | Peak Area (%) |
|------|-------------------|----------------------|-------------------|------------------|---------------|
| 1    | PDA 254 nm        | 17.875               | 5058514           | 121150           | 50.752        |
| 2    | PDA 254 nm        | 20.640               | 4908570           | 107131           | 49.248        |

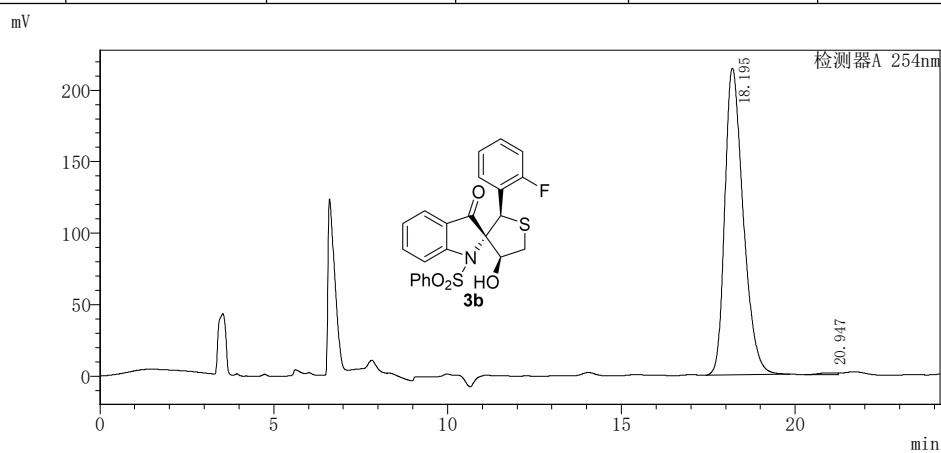

| Peak | Processed Channel | Retention Time (min) | Peak Area (mAU*s) | Peak Hight (mAU) | Peak Area (%) |
|------|-------------------|----------------------|-------------------|------------------|---------------|
| 1    | PDA 254 nm        | 18.195               | 7921270           | 214558           | 99.380        |
| 2    | PDA 254 nm        | 20.947               | 49406             | 1457             | 0.620         |

The **enantiomeric excess** was determined by HPLC with an IC-H column (*n*-hexane/*i*-PrOH = 90/10, flow rate 1.0 mL/min,  $\lambda = 254$  nm),  $t_R = 15.608$  min (major),  $t_R = 21.006$  min (minor), 85% ee.

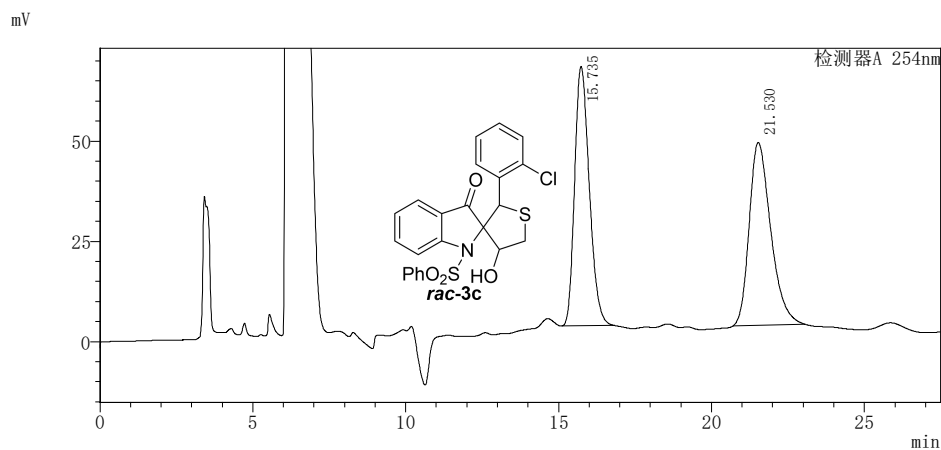

| Peak | Processed Channel | Retention Time (min) | Peak Area (mAU*s) | Peak Hight (mAU) | Peak Area (%) |
|------|-------------------|----------------------|-------------------|------------------|---------------|
| 1    | PDA 254 nm        | 15.735               | 2156507           | 64721            | 49.186        |
| 2    | PDA 254 nm        | 21.530               | 2227919           | 45576            | 50.814        |

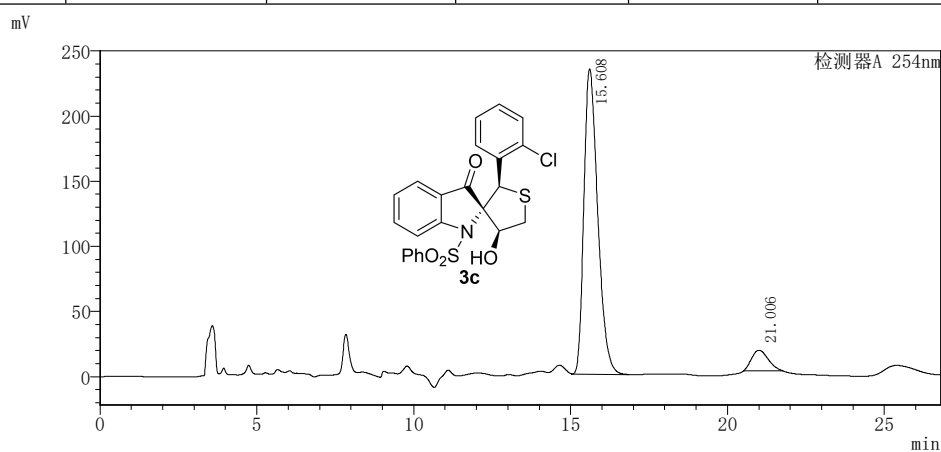

| Peak | Processed Channel | Retention Time (min) | Peak Area (mAU*s) | Peak Hight (mAU) | Peak Area (%) |
|------|-------------------|----------------------|-------------------|------------------|---------------|
| 1    | PDA 254 nm        | 15.608               | 71.84051          | 234376           | 92.446        |
| 2    | PDA 254 nm        | 21.006               | 587004            | 15907            | 7.554         |

The **enantiomeric excess** was determined by HPLC with an IC-H column (*n*-hexane/*i*-PrOH = 90/10, flow rate 1.0 mL/min,  $\lambda = 254$  nm),  $t_R = 16.639$  min (major),  $t_R = 21.025$  min (minor), 94% ee.

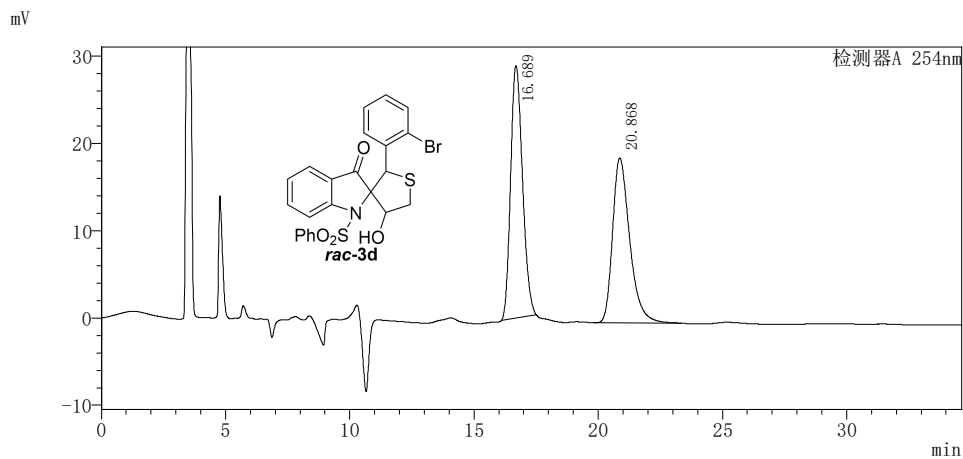

| Peak | Processed Channel | Retention Time (min) | Peak Area (mAU*s) | Peak Hight (mAU) | Peak Area (%) |
|------|-------------------|----------------------|-------------------|------------------|---------------|
| 1    | PDA 254 nm        | 16.689               | 960257            | 28946            | 51.437        |
| 2    | PDA 254 nm        | 20.868               | 906587            | 18912            | 48.563        |

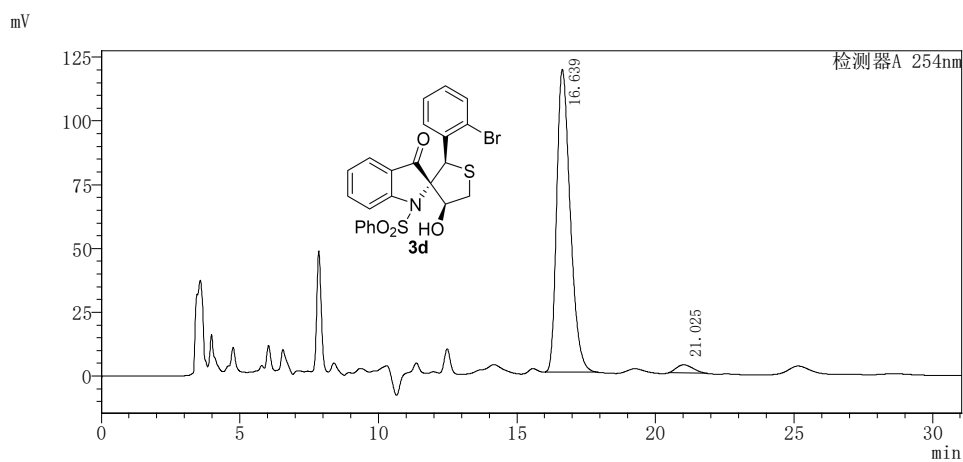

| Peak | Processed Channel | Retention Time (min) | Peak Area (mAU*s) | Peak Hight (mAU) | Peak Area (%) |
|------|-------------------|----------------------|-------------------|------------------|---------------|
| 1    | PDA 254 nm        | 16.639               | 4023302           | 118680           | 96.814        |
| 2    | PDA 254 nm        | 21.025               | 132389            | 3167             | 3.186         |

The **enantiomeric excess** was determined by HPLC with an IC-H column (*n*-hexane/*i*-PrOH = 95/5, flow rate 1.0 mL/min,  $\lambda = 254$  nm),  $t_R = 43.111$  min (minor),  $t_R = 52.326$  min (major), 97% ee.

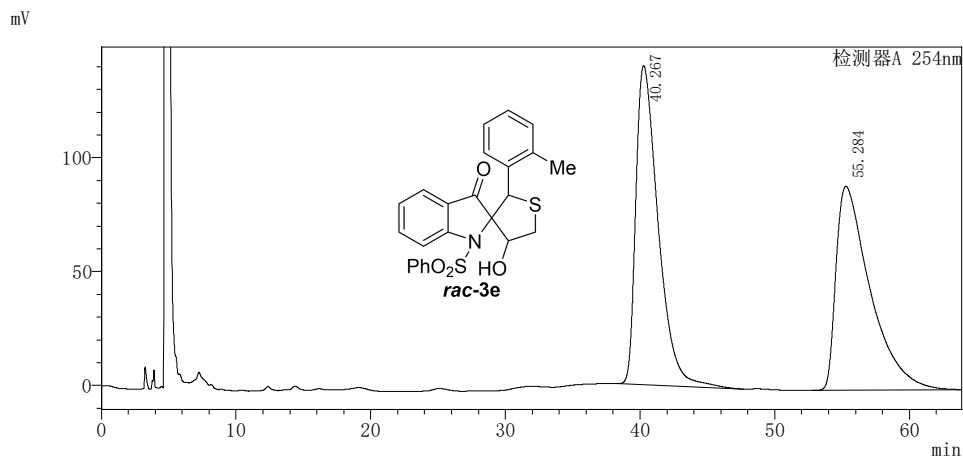

| Peak | Processed Channel | Retention Time (min) | Peak Area (mAU*s) | Peak Hight (mAU) | Peak Area (%) |
|------|-------------------|----------------------|-------------------|------------------|---------------|
| 1    | PDA 254 nm        | 40.267               | 16206606          | 140223           | 50.646        |
| 2    | PDA 254 nm        | 55.284               | 15793274          | 89690            | 49.354        |

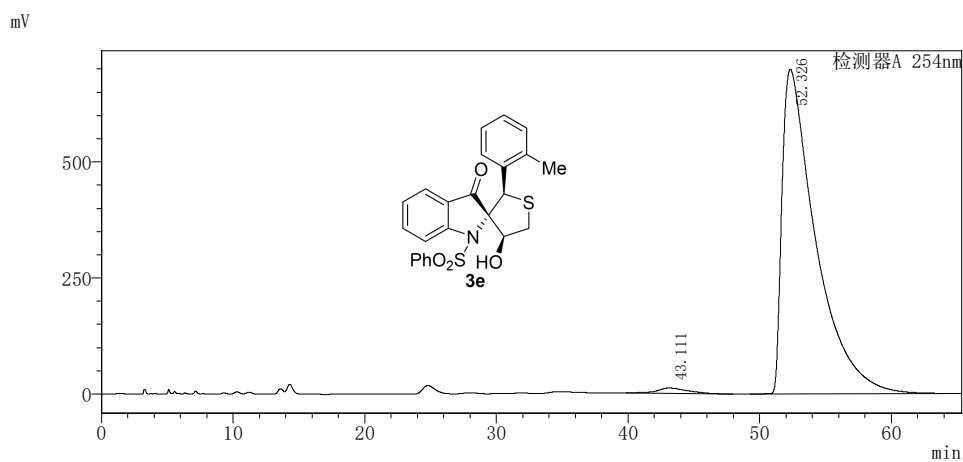

| Peak | Processed Channel | Retention Time (min) | Peak Area (mAU*s) | Peak Hight (mAU) | Peak Area (%) |
|------|-------------------|----------------------|-------------------|------------------|---------------|
| 1    | PDA 254 nm        | 43.111               | 19.56709          | 11776            | 1.547         |
| 2    | PDA 254 nm        | 52.326               | 124531533         | 699683           | 98.453        |



The **enantiomeric excess** was determined by HPLC with an IC-H column (*n*-hexane/*i*-PrOH = 95/5, flow rate 1.0 mL/min,  $\lambda = 254$  nm),  $t_R = 18.158$  min (minor),  $t_R = 22.560$  min (major), 83% ee.

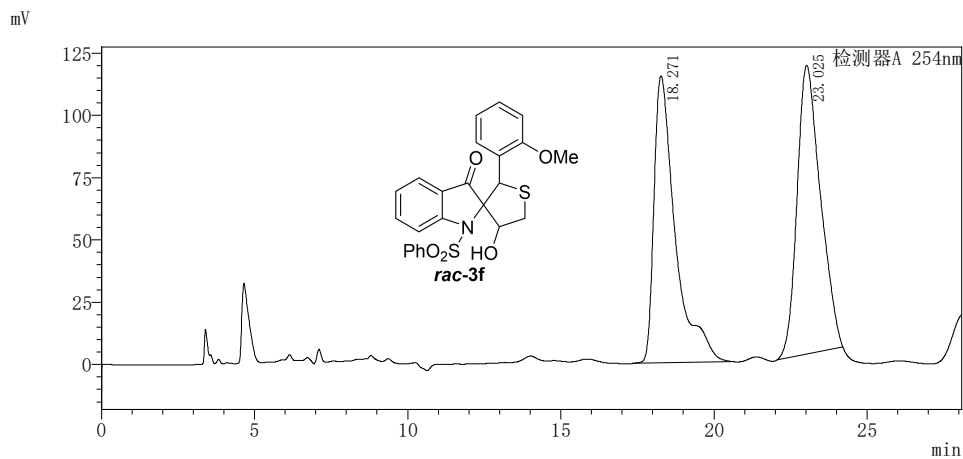

| Peak | Processed Channel | Retention Time (min) | Peak Area (mAU*s) | Peak Hight (mAU) | Peak Area (%) |
|------|-------------------|----------------------|-------------------|------------------|---------------|
| 1    | PDA 254 nm        | 18.271               | 5607458           | 115208           | 47.724        |
| 2    | PDA 254 nm        | 23.025               | 6142304           | 115858           | 52.276        |

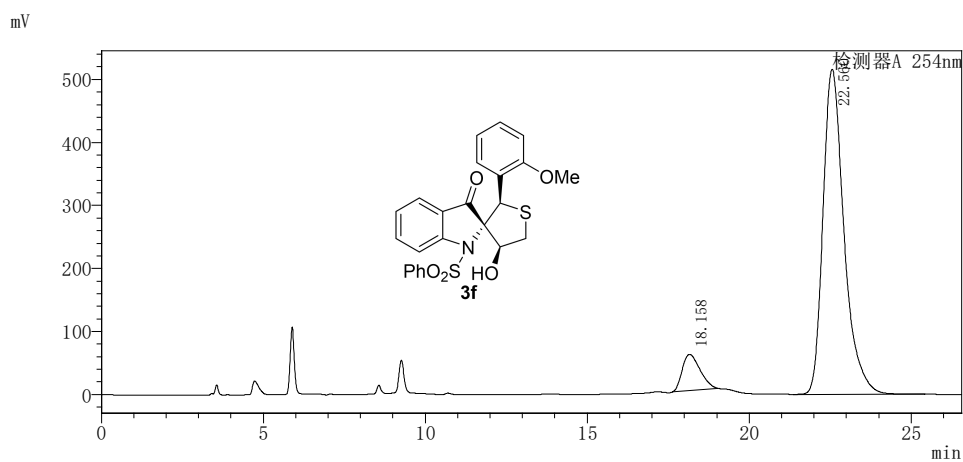

| Peak | Processed Channel | Retention Time (min) | Peak Area (mAU*s) | Peak Hight (mAU) | Peak Area (%) |
|------|-------------------|----------------------|-------------------|------------------|---------------|
| 1    | PDA 254 nm        | 18.158               | 2182812           | 57428            | 8.569         |
| 2    | PDA 254 nm        | 22.560               | 23289736          | 515954           | 91.431        |

The **enantiomeric excess** was determined by HPLC with an IC-H column (*n*-hexane/*i*-PrOH = 90/10, flow rate 1.0 mL/min,  $\lambda = 254$  nm),  $t_R = 10.569$  min (major),  $t_R = 11.732$  min (minor), 93% ee.

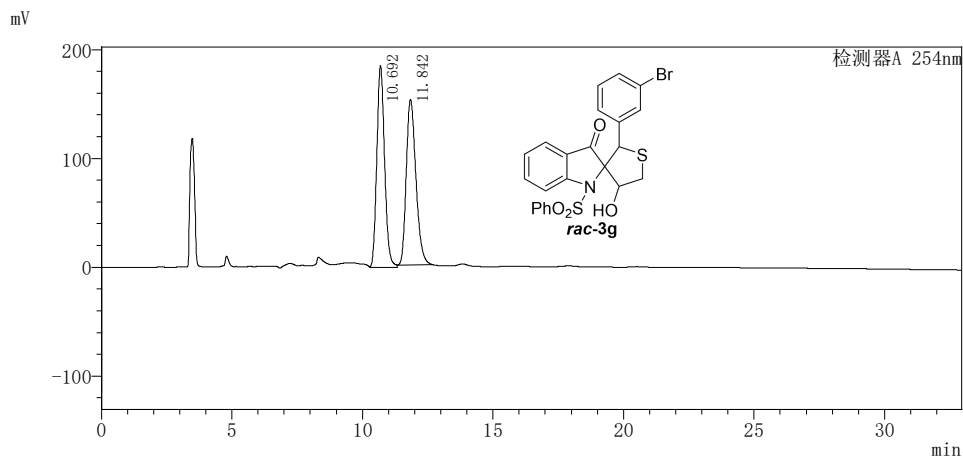

| Peak | Processed Channel | Retention Time (min) | Peak Area (mAU*s) | Peak Height (mAU) | Peak Area (%) |
|------|-------------------|----------------------|-------------------|-------------------|---------------|
| 1    | PDA 254 nm        | 10.692               | 3847152           | 185607            | 49.647        |
| 2    | PDA 254 nm        | 11.842               | 3901837           | 152271            | 50.353        |

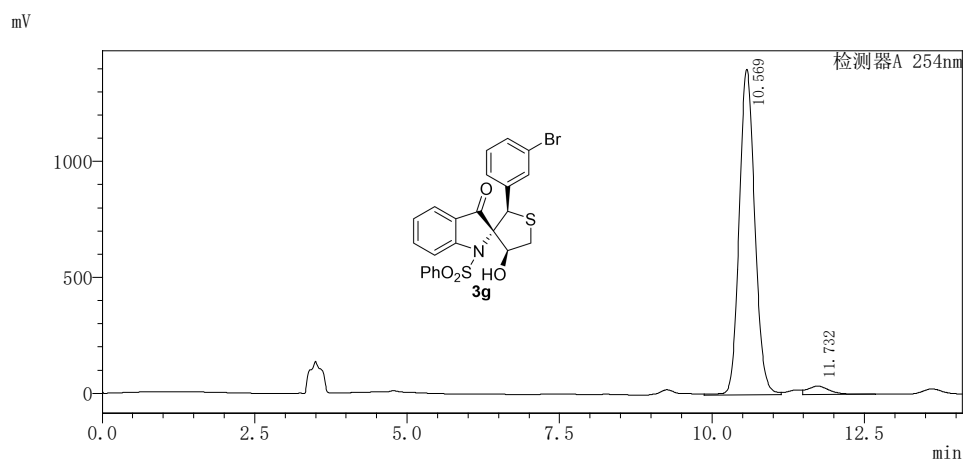

| Peak | Processed Channel | Retention Time (min) | Peak Area (mAU*s) | Peak Height (mAU) | Peak Area (%) |
|------|-------------------|----------------------|-------------------|-------------------|---------------|
| 1    | PDA 254 nm        | 10.569               | 24926410          | 1404205           | 96.449        |
| 2    | PDA 254 nm        | 11.732               | 917769            | 36502             | 3.551         |

The **enantiomeric excess** was determined by HPLC with an IC-H column (*n*-hexane/*i*-PrOH = 90/10, flow rate 1.0 mL/min,  $\lambda = 254$  nm),  $t_R = 23.225$  min (minor),  $t_R = 30.140$  min (major), 98% ee.

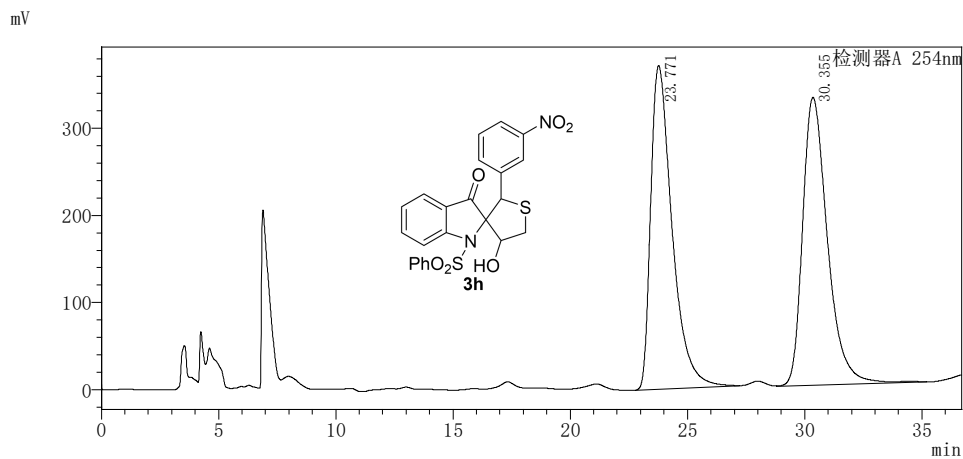

| Peak | Processed Channel | Retention Time (min) | Peak Area (mAU*s) | Peak Height (mAU) | Peak Area (%) |
|------|-------------------|----------------------|-------------------|-------------------|---------------|
| 1    | PDA 254 nm        | 23.771               | 23543499          | 371758            | 49.072        |
| 2    | PDA 254 nm        | 30.355               | 24433801          | 330745            | 50.928        |

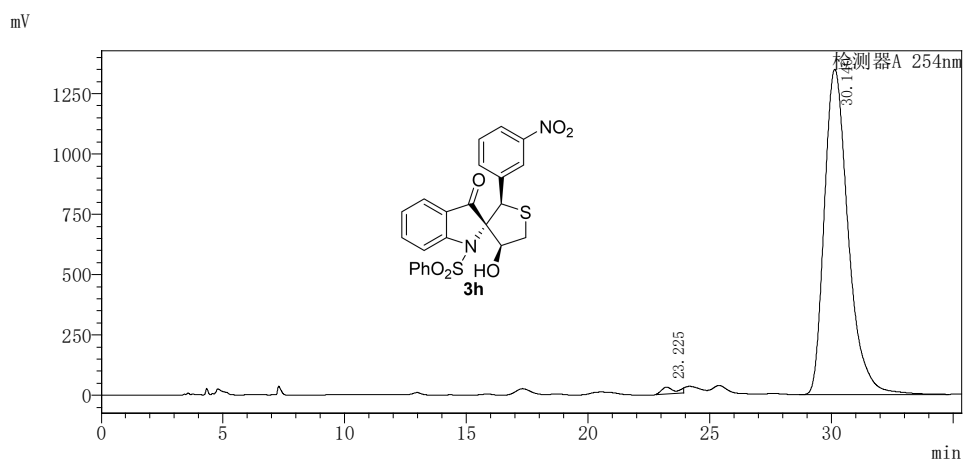

| Peak | Processed Channel | Retention Time (min) | Peak Area (mAU*s) | Peak Height (mAU) | Peak Area (%) |
|------|-------------------|----------------------|-------------------|-------------------|---------------|
| 1    | PDA 254 nm        | 23.225               | 1076975           | 28235             | 1.156         |
| 2    | PDA 254 nm        | 30.140               | 92110140          | 1348871           | 98.844        |

The **enantiomeric excess** was determined by HPLC with an IC-H column (*n*-hexane/*i*-PrOH = 90/10, flow rate 1.0 mL/min,  $\lambda = 254$  nm),  $t_R = 34.691$  min (major),  $t_R = 40.095$  min (minor), 82% ee (**recrystallization up to 90% ee**).

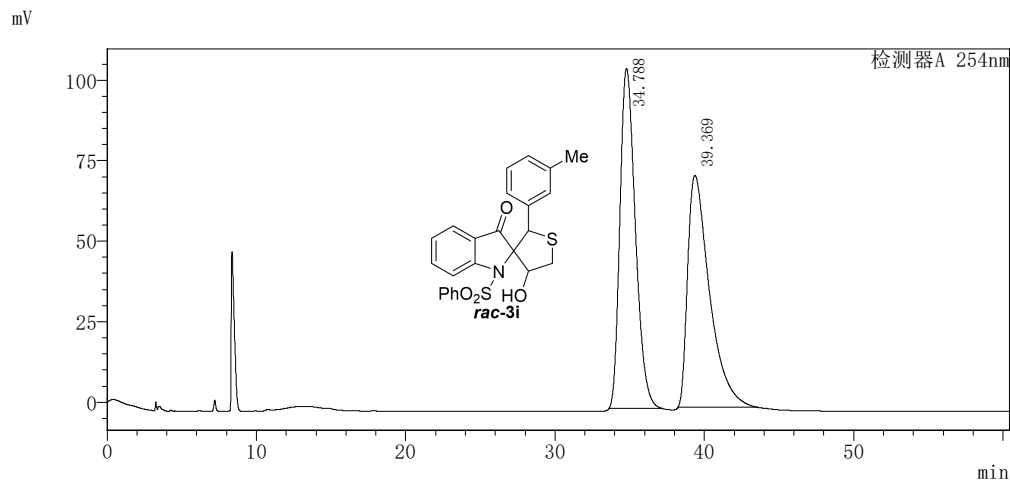

| Peak | Processed Channel | Retention Time (min) | Peak Area (mAU*s) | Peak Hight (mAU) | Peak Area (%) |
|------|-------------------|----------------------|-------------------|------------------|---------------|
| 1    | PDA 254 nm        | 34.788               | 7620440           | 105674           | 50.929        |
| 2    | PDA 254 nm        | 39.369               | 7342439           | 72053            | 49.071        |

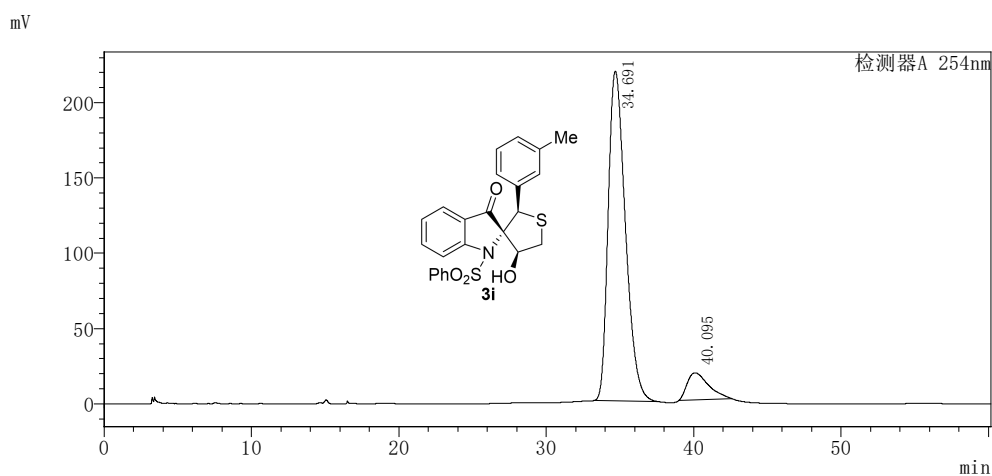

| Peak | Processed Channel | Retention Time (min) | Peak Area (mAU*s) | Peak Hight (mAU) | Peak Area (%) |
|------|-------------------|----------------------|-------------------|------------------|---------------|
| 1    | PDA 254 nm        | 34.691               | 17793139          | 219168           | 90.757        |
| 2    | PDA 254 nm        | 40.095               | 1812175           | 17975            | 9.243         |

**Liquid phase of 3i:** the **enantiomeric excess** was determined by HPLC with an IC-H column (*n*-hexane/*i*-PrOH = 90/10, flow rate 1.0 mL/min,  $\lambda = 254$  nm),  $t_R = 35.223$  min (major),  $t_R = 40.920$  min (minor), 90% ee.

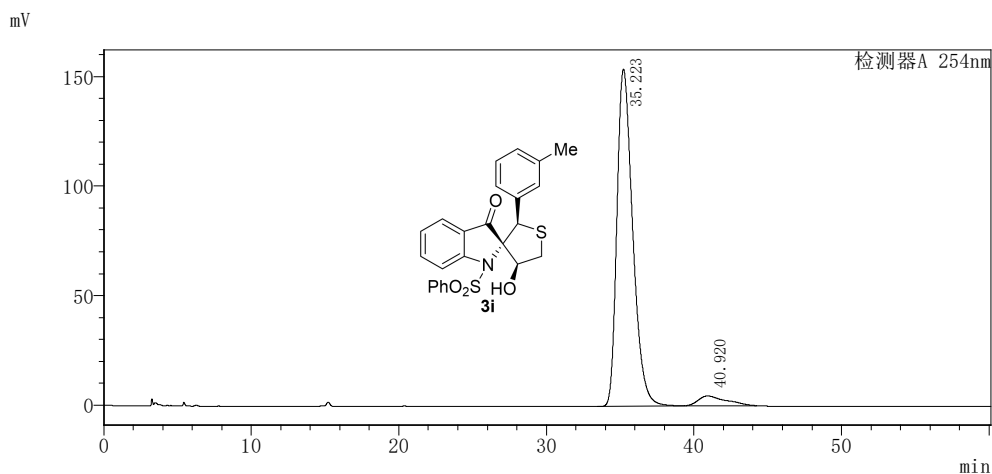

| Peak | Processed Channel | Retention Time (min) | Peak Area (mAU*s) | Peak Hight (mAU) | Peak Area (%) |
|------|-------------------|----------------------|-------------------|------------------|---------------|
| 1    | PDA 254 nm        | 35.223               | 11459644          | 154046           | 95.205        |
| 2    | PDA 254 nm        | 40.920               | 577209            | 4422             | 4.795         |

**Solid phase of 3i:** the **enantiomeric excess** was determined by HPLC with an IC-H column (*n*-hexane/*i*-PrOH = 90/10, flow rate 1.0 mL/min,  $\lambda = 254$  nm),  $t_R = 35.351$  min (major),  $t_R = 39.893$  min (minor), 10% ee.

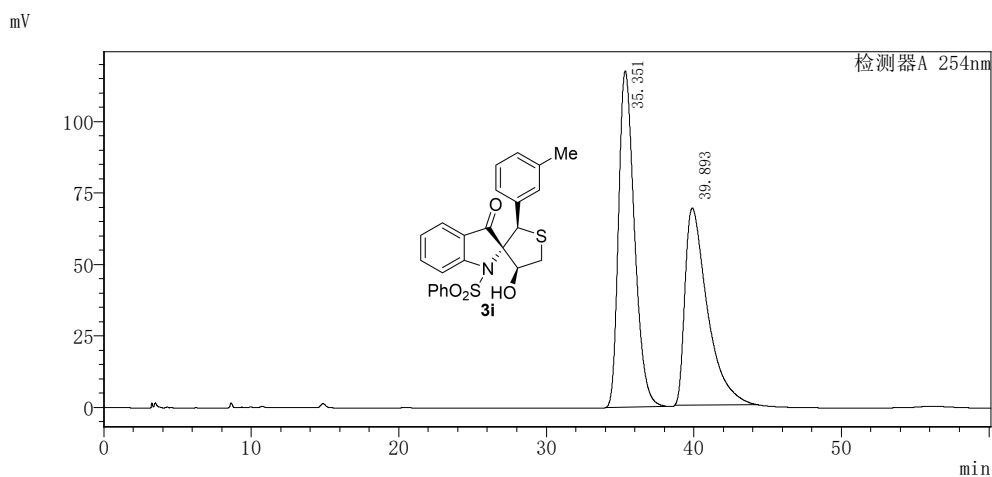

| Peak | Processed Channel | Retention Time (min) | Peak Area (mAU*s) | Peak Hight (mAU) | Peak Area (%) |
|------|-------------------|----------------------|-------------------|------------------|---------------|
| 1    | PDA 254 nm        | 35.351               | 8794886           | 117669           | 54.557        |
| 2    | PDA 254 nm        | 39.893               | 7325644           | 69068            | 45.443        |

The **enantiomeric excess** was determined by HPLC with an IC-H column (*n*-hexane/*i*-PrOH = 90/10, flow rate 1.0 mL/min,  $\lambda = 254$  nm),  $t_R = 19.477$  min (major),  $t_R = 38.764$  min (minor), 98% ee.

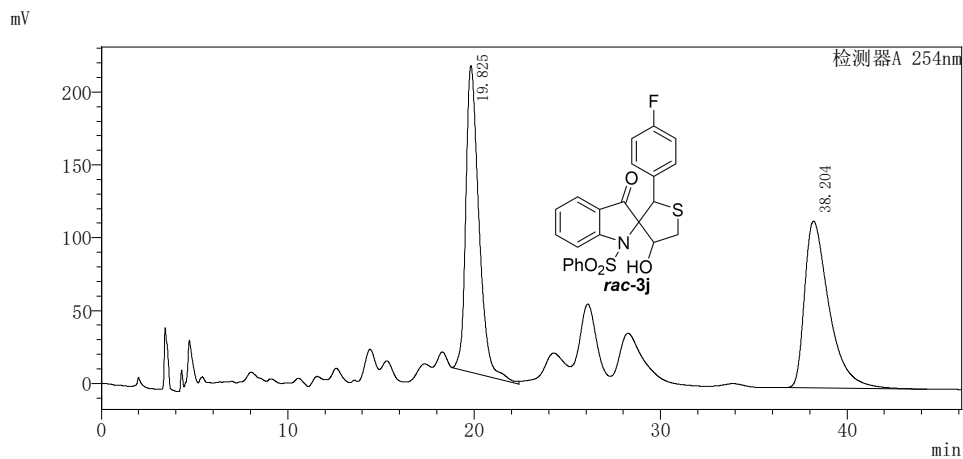

| Peak | Processed Channel | Retention Time (min) | Peak Area (mAU*s) | Peak Height (mAU) | Peak Area (%) |
|------|-------------------|----------------------|-------------------|-------------------|---------------|
| 1    | PDA 254 nm        | 19.825               | 10340224          | 210621            | 49.613        |
| 2    | PDA 254 nm        | 38.204               | 10501692          | 114614            | 50.387        |

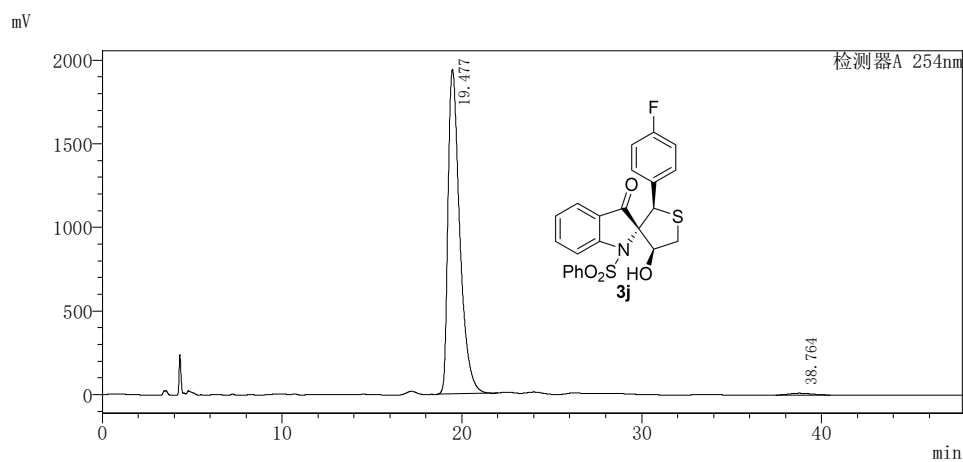

| Peak | Processed Channel | Retention Time (min) | Peak Area (mAU*s) | Peak Height (mAU) | Peak Area (%) |
|------|-------------------|----------------------|-------------------|-------------------|---------------|
| 1    | PDA 254 nm        | 19.477               | 88228875          | 1940862           | 98.942        |
| 2    | PDA 254 nm        | 38.764               | 943197            | 11131             | 1.058         |

The **enantiomeric excess** was determined by HPLC with an IA-H column (*n*-hexane/*i*-PrOH = 90/10, flow rate 1.0 mL/min,  $\lambda = 254$  nm),  $t_R = 17.648$  min (major),  $t_R = 19.043$  min (minor), 91% ee ([recrystallization up to 98% ee](#)).

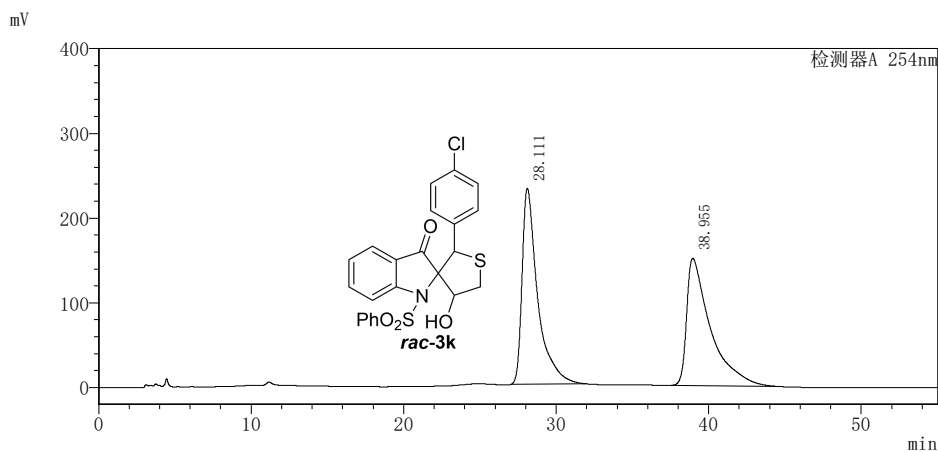

| Peak | Processed Channel | Retention Time (min) | Peak Area (mAU*s) | Peak Hight (mAU) | Peak Area (%) |
|------|-------------------|----------------------|-------------------|------------------|---------------|
| 1    | PDA 254 nm        | 28.111               | 16467861          | 231286           | 50.209        |
| 2    | PDA 254 nm        | 38.955               | 16330503          | 150315           | 49.791        |

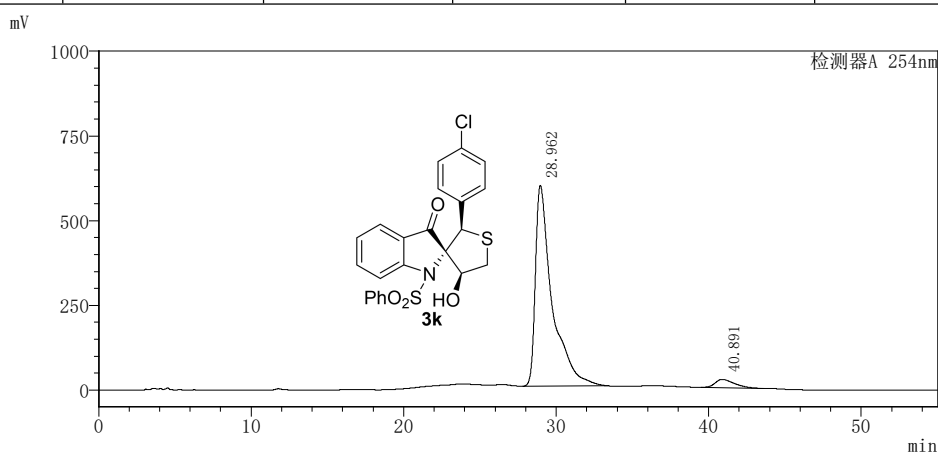

| Peak | Processed Channel | Retention Time (min) | Peak Area (mAU*s) | Peak Hight (mAU) | Peak Area (%) |
|------|-------------------|----------------------|-------------------|------------------|---------------|
| 1    | PDA 254 nm        | 28.962               | 45411867          | 592904           | 95.478        |
| 2    | PDA 254 nm        | 40.891               | 2150717           | 24482            | 4.522         |

**Liquid phase of 3k:** the **enantiomeric excess** was determined by HPLC with an IA-H column (*n*-hexane/*i*-PrOH = 90/10, flow rate 1.0 mL/min,  $\lambda = 254$  nm),  $t_R = 27.498$  min (major),  $t_R = 37.947$  min (minor), 98% ee.

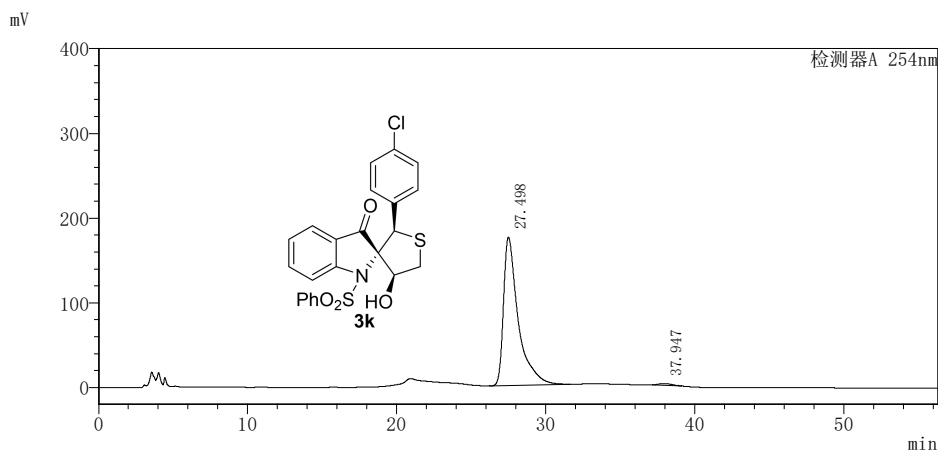

| Peak | Processed Channel | Retention Time (min) | Peak Area (mAU*s) | Peak Hight (mAU) | Peak Area (%) |
|------|-------------------|----------------------|-------------------|------------------|---------------|
| 1    | PDA 254 nm        | 27.498               | 12022164          | 175245           | 98.886        |
| 2    | PDA 254 nm        | 37.947               | 135468            | 2223             | 1.114         |

**Solid phase of 3k:** the **enantiomeric excess** was determined by HPLC with an IA-H column (*n*-hexane/*i*-PrOH = 90/10, flow rate 1.0 mL/min,  $\lambda = 254$  nm),  $t_R = 28.073$  min (major),  $t_R = 38.928$  min (minor), 84% ee.

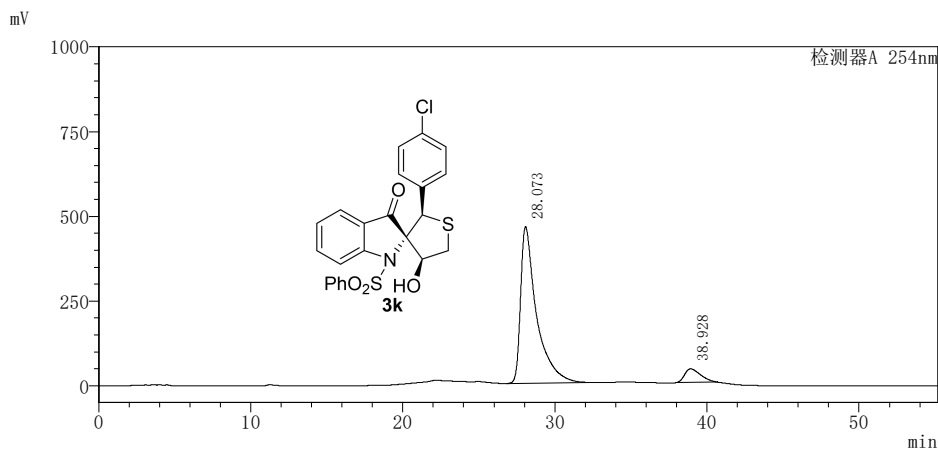

| Peak | Processed Channel | Retention Time (min) | Peak Area (mAU*s) | Peak Hight (mAU) | Peak Area (%) |
|------|-------------------|----------------------|-------------------|------------------|---------------|
| 1    | PDA 254 nm        | 28.073               | 33603961          | 462212           | 92.045        |
| 2    | PDA 254 nm        | 38.928               | 2904207           | 39932            | 7.955         |



The **enantiomeric excess** was determined by HPLC with an IA-H column (*n*-hexane/*i*-PrOH = 90/10, flow rate 1.0 mL/min,  $\lambda = 254$  nm),  $t_R = 31.059$  min (major),  $t_R = 45.987$  min (minor), 90% ee ([recrystallization up to 98% ee](#)).

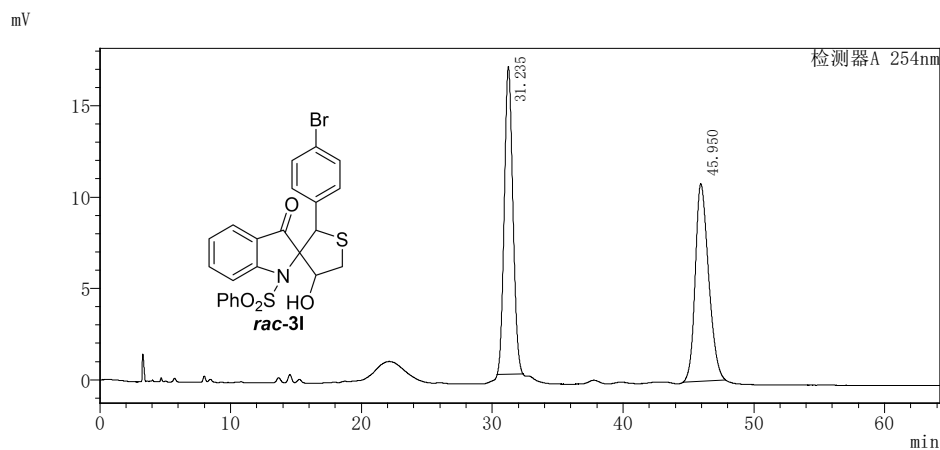

| Peak | Processed Channel | Retention Time (min) | Peak Area (mAU*s) | Peak Hight (mAU) | Peak Area (%) |
|------|-------------------|----------------------|-------------------|------------------|---------------|
| 1    | PDA 254 nm        | 31.235               | 768098            | 16839            | 50.123        |
| 2    | PDA 254 nm        | 45.950               | 764321            | 10810            | 49.877        |

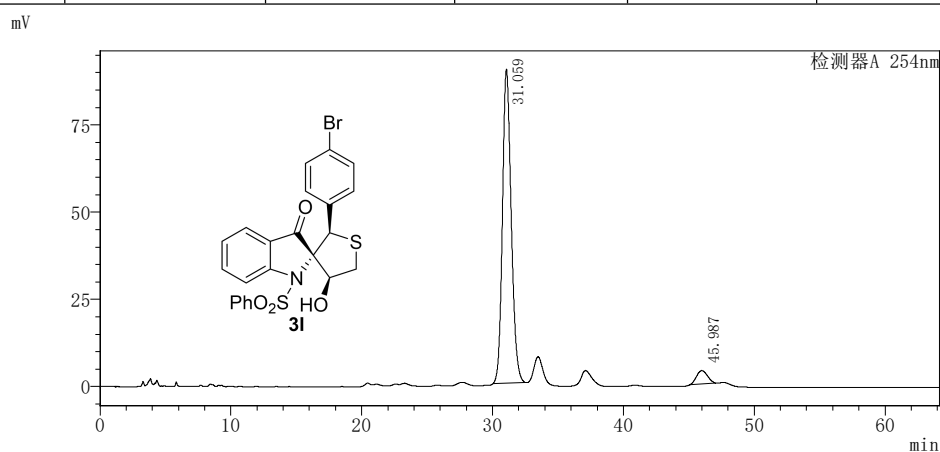

| Peak | Processed Channel | Retention Time (min) | Peak Area (mAU*s) | Peak Hight (mAU) | Peak Area (%) |
|------|-------------------|----------------------|-------------------|------------------|---------------|
| 1    | PDA 254 nm        | 31.059               | 4194022           | 90078            | 94.936        |
| 2    | PDA 254 nm        | 45.987               | 223717            | 3845             | 5.064         |

**Liquid phase of 31:** the **enantiomeric excess** was determined by HPLC with an IA-H column (*n*-hexane/*i*-PrOH = 90/10, flow rate 1.0 mL/min,  $\lambda = 254$  nm),  $t_R = 31.140$  min (major),  $t_R = 46.239$  min (minor), 98% ee.

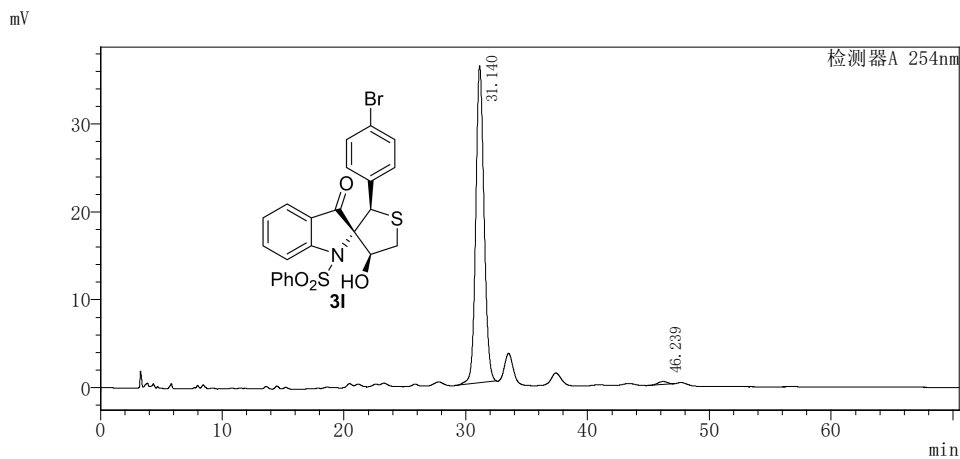

| Peak | Processed Channel | Retention Time (min) | Peak Area (mAU*s) | Peak Hight (mAU) | Peak Area (%) |
|------|-------------------|----------------------|-------------------|------------------|---------------|
| 1    | PDA 254 nm        | 31.140               | 1714569           | 36107            | 98.885        |
| 2    | PDA 254 nm        | 46.239               | 19342             | 348              | 1.115         |

**Solid phase of 31:** the **enantiomeric excess** was determined by HPLC with an IA-H column (*n*-hexane/*i*-PrOH = 90/10, flow rate 1.0 mL/min,  $\lambda = 254$  nm),  $t_R = 31.041$  min (major),  $t_R = 45.820$  min (minor), 72% ee.

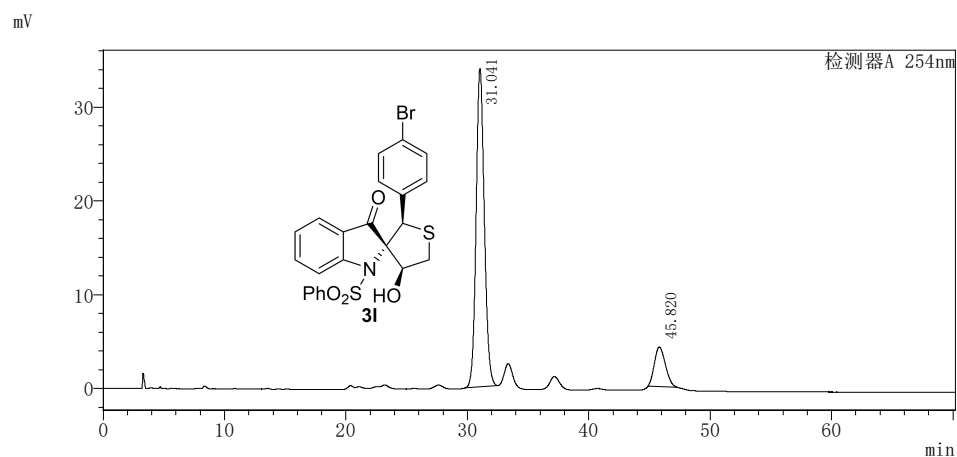

| Peak | Processed Channel | Retention Time (min) | Peak Area (mAU*s) | Peak Hight (mAU) | Peak Area (%) |
|------|-------------------|----------------------|-------------------|------------------|---------------|
| 1    | PDA 254 nm        | 31.041               | 1596942           | 33968            | 85.600        |
| 2    | PDA 254 nm        | 45.820               | 268634            | 4233             | 14.400        |

The **enantiomeric excess** was determined by HPLC with an IC-H column (*n*-hexane/*i*-PrOH = 90/10, flow rate 1.0 mL/min,  $\lambda = 254$  nm),  $t_R = 11.875$  min (major),  $t_R = 13.372$  min (minor), 94% ee.

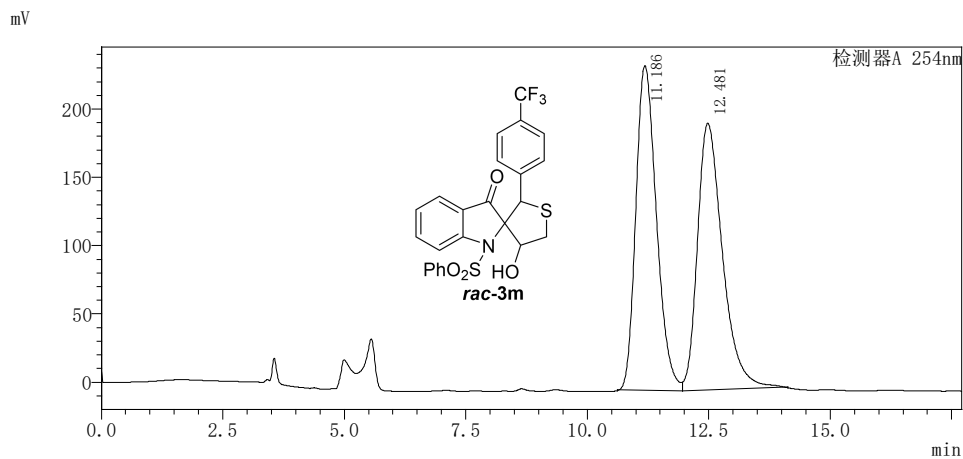

| Peak | Processed Channel | Retention Time (min) | Peak Area (mAU*s) | Peak Height (mAU) | Peak Area (%) |
|------|-------------------|----------------------|-------------------|-------------------|---------------|
| 1    | PDA 254 nm        | 11.186               | 7027366           | 237870            | 50.056        |
| 2    | PDA 254 nm        | 12.481               | 7011705           | 195295            | 49.944        |

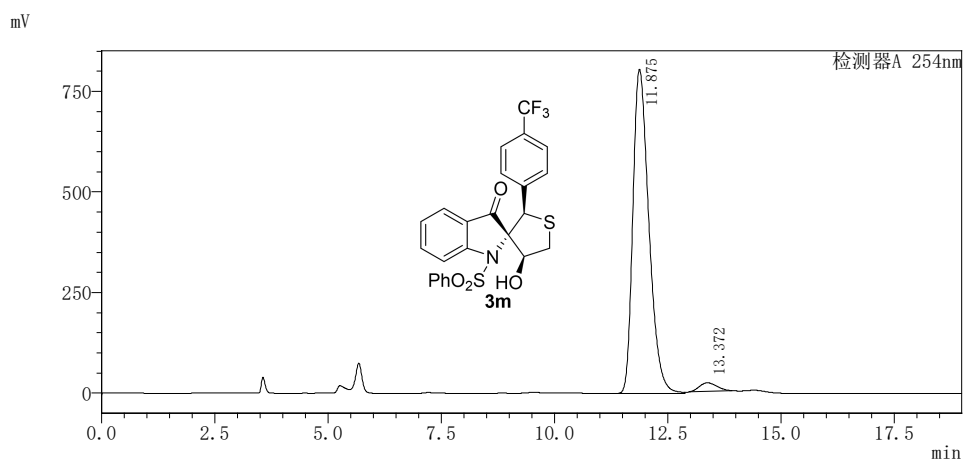

| Peak | Processed Channel | Retention Time (min) | Peak Area (mAU*s) | Peak Height (mAU) | Peak Area (%) |
|------|-------------------|----------------------|-------------------|-------------------|---------------|
| 1    | PDA 254 nm        | 11.875               | 19823789          | 805739            | 97.185        |
| 2    | PDA 254 nm        | 13.372               | 574212            | 21305             | 2.815         |

The **enantiomeric excess** was determined by HPLC with an IC-H column (*n*-hexane/*i*-PrOH = 90/10, flow rate 1.0 mL/min,  $\lambda = 254$  nm),  $t_R = 14.300$  min (major),  $t_R = 19.859$  min (minor), 83% ee.

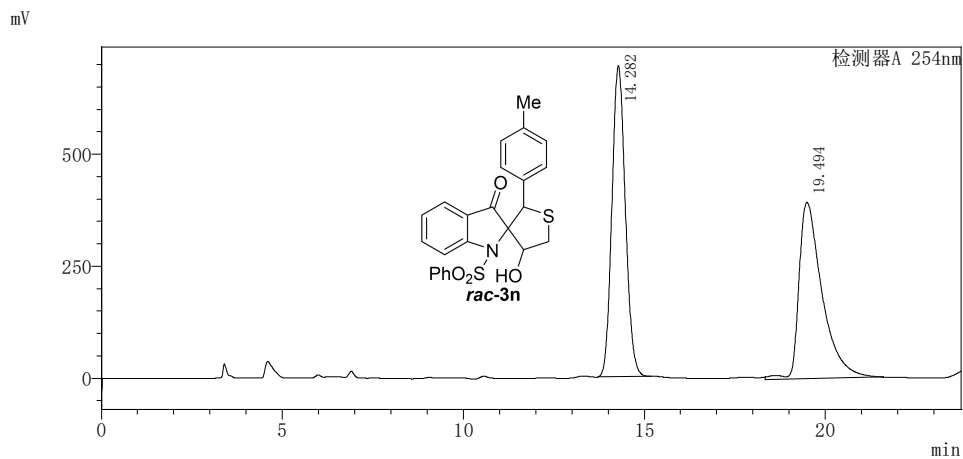

| Peak | Processed Channel | Retention Time (min) | Peak Area (mAU*s) | Peak Height (mAU) | Peak Area (%) |
|------|-------------------|----------------------|-------------------|-------------------|---------------|
| 1    | PDA 254 nm        | 14.282               | 17960362          | 694297            | 50.788        |
| 2    | PDA 254 nm        | 19.494               | 17402835          | 393384            | 49.212        |

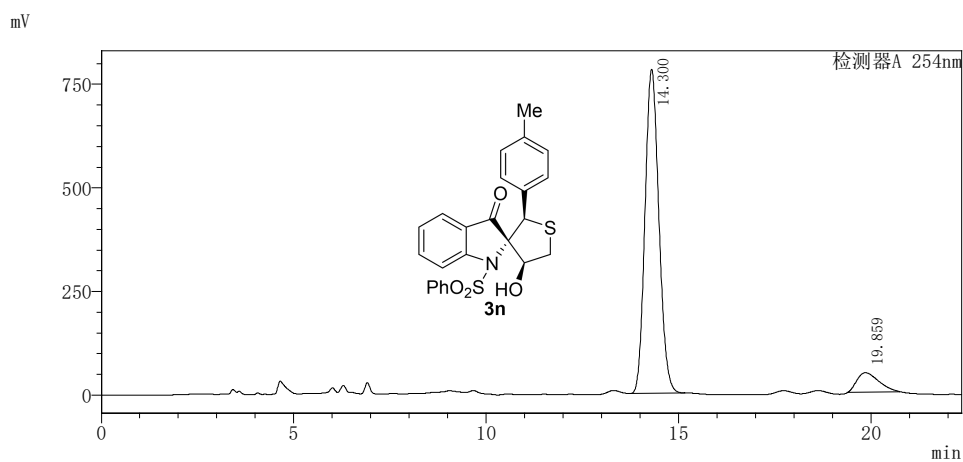

| Peak | Processed Channel | Retention Time (min) | Peak Area (mAU*s) | Peak Height (mAU) | Peak Area (%) |
|------|-------------------|----------------------|-------------------|-------------------|---------------|
| 1    | PDA 254 nm        | 14.300               | 19630545          | 782098            | 91.534        |
| 2    | PDA 254 nm        | 19.859               | 1862690           | 46937             | 8.466         |

The **enantiomeric excess** was determined by HPLC with an IC-H column (*n*-hexane/*i*-PrOH = 90/10, flow rate 1.0 mL/min,  $\lambda = 254$  nm),  $t_R = 24.618$  min (major),  $t_R = 29.009$  min (minor), 86% ee ([recrystallization up to 99% ee](#)).

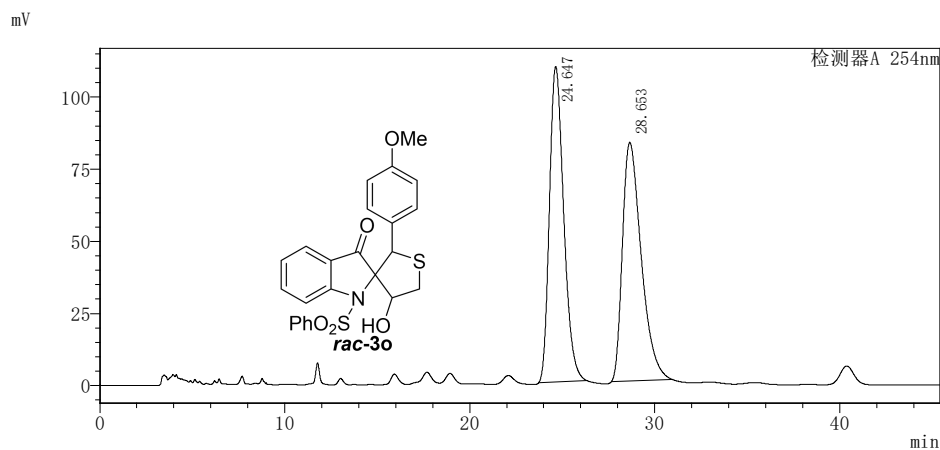

| Peak | Processed Channel | Retention Time (min) | Peak Area (mAU*s) | Peak Hight (mAU) | Peak Area (%) |
|------|-------------------|----------------------|-------------------|------------------|---------------|
| 1    | PDA 254 nm        | 24.647               | 5868554           | 109366           | 50.056        |
| 2    | PDA 254 nm        | 28.653               | 5855393           | 82782            | 49.944        |

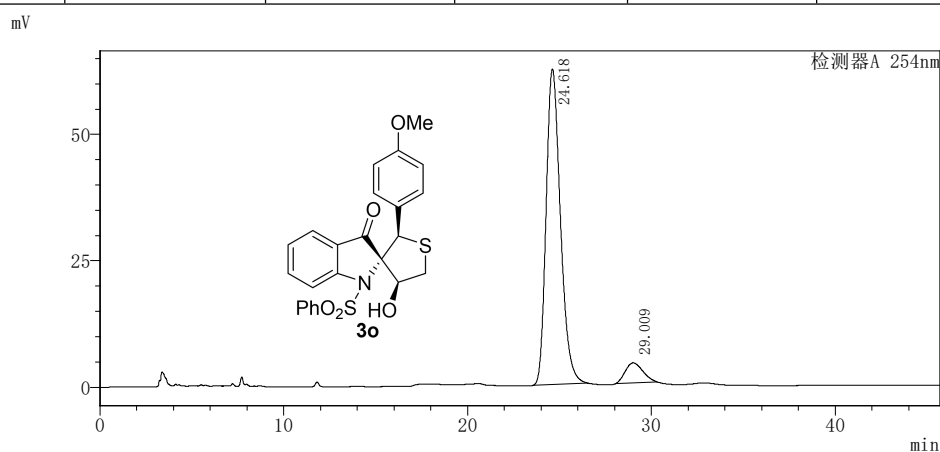

| Peak | Processed Channel | Retention Time (min) | Peak Area (mAU*s) | Peak Hight (mAU) | Peak Area (%) |
|------|-------------------|----------------------|-------------------|------------------|---------------|
| 1    | PDA 254 nm        | 24.618               | 3373748           | 62419            | 92.729        |
| 2    | PDA 254 nm        | 29.009               | 264554            | 3969             | 7.271         |

**Liquid phase of 3o:** The **enantiomeric excess** was determined by HPLC with an IC-H column (*n*-hexane/*i*-PrOH = 90/10, flow rate 1.0 mL/min,  $\lambda = 254$  nm),  $t_R = 24.707$  min (major),  $t_R = 29.320$  min (minor), 99% ee.

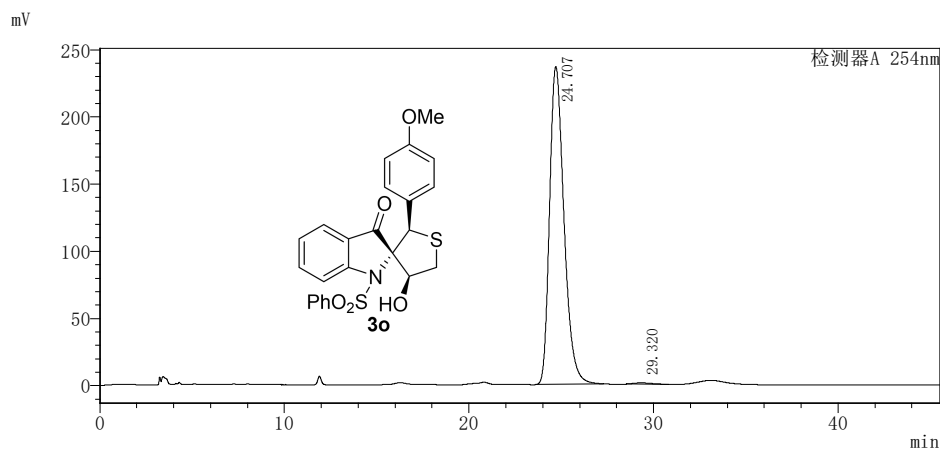

| Peak | Processed Channel | Retention Time (min) | Peak Area (mAU*s) | Peak Hight (mAU) | Peak Area (%) |
|------|-------------------|----------------------|-------------------|------------------|---------------|
| 1    | PDA 254 nm        | 24.707               | 12825027          | 236582           | 99.503        |
| 2    | PDA 254 nm        | 29.320               | 64030             | 971              | 0.497         |

**Solid phase of 3o:** The **enantiomeric excess** was determined by HPLC with an IC-H column (*n*-hexane/*i*-PrOH = 90/10, flow rate 1.0 mL/min,  $\lambda = 254$  nm),  $t_R = 24.690$  min (major),  $t_R = 28.950$  min (minor), 71% ee.

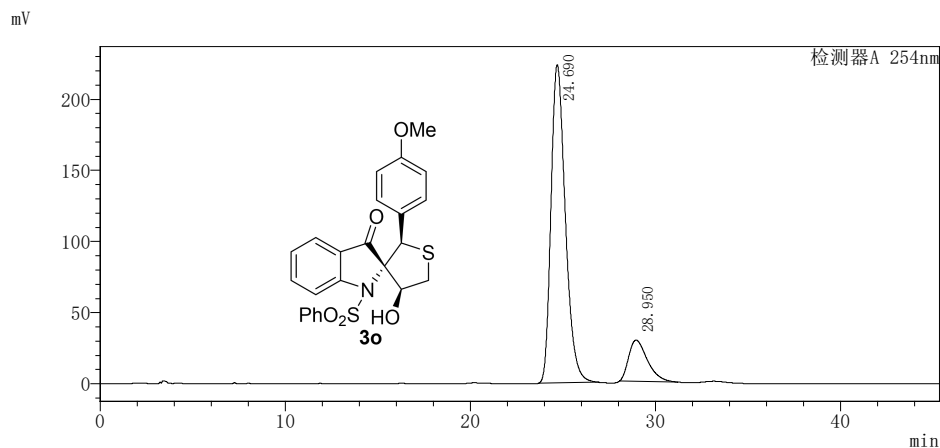

| Peak | Processed Channel | Retention Time (min) | Peak Area (mAU*s) | Peak Hight (mAU) | Peak Area (%) |
|------|-------------------|----------------------|-------------------|------------------|---------------|
| 1    | PDA 254 nm        | 24.690               | 12062960          | 223779           | 85.451        |
| 2    | PDA 254 nm        | 28.950               | 2053810           | 29136            | 14.549        |

The **enantiomeric excess** was determined by HPLC with an IA-H column (*n*-hexane/*i*-PrOH = 80/20, flow rate 0.8 mL/min,  $\lambda = 254$  nm),  $t_R = 17.648$  min (major),  $t_R = 19.043$  min (minor), 88% ee.

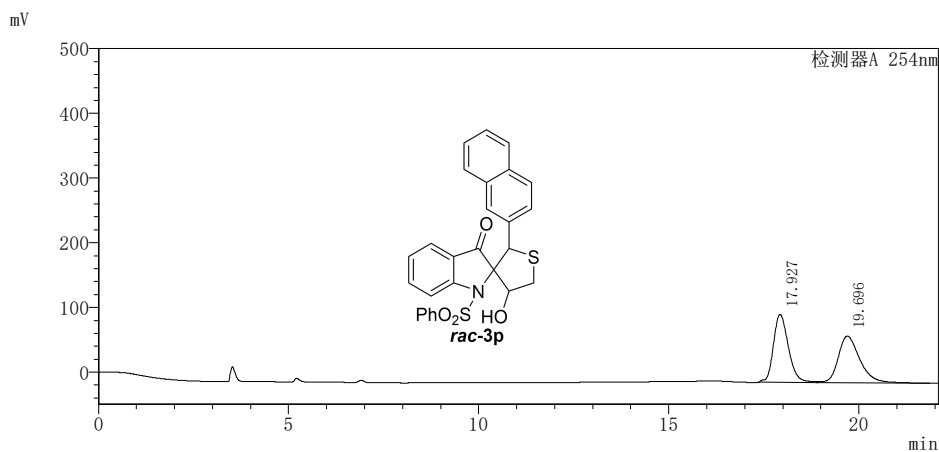

| Peak | Processed Channel | Retention Time (min) | Peak Area (mAU*s) | Peak Hight (mAU) | Peak Area (%) |
|------|-------------------|----------------------|-------------------|------------------|---------------|
| 1    | PDA 254 nm        | 17.927               | 2888096           | 105300           | 50.079        |
| 2    | PDA 254 nm        | 19.696               | 2878970           | 72411            | 49.921        |

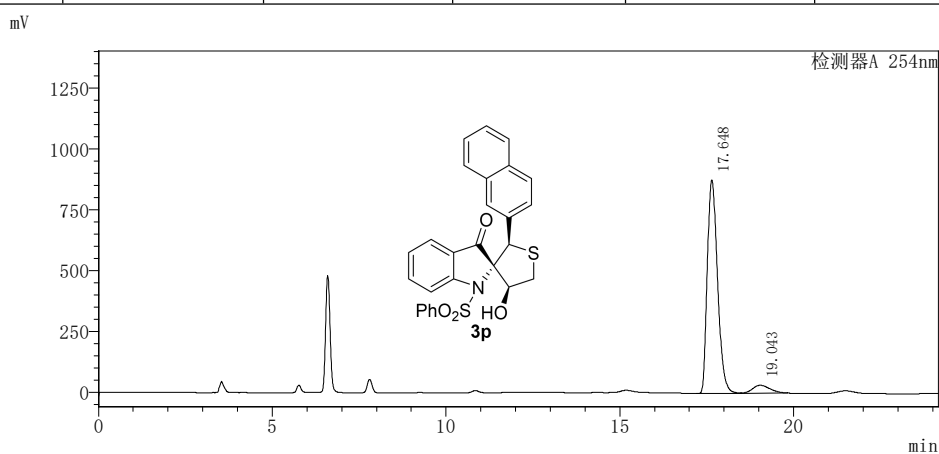

| Peak | Processed Channel | Retention Time (min) | Peak Area (mAU*s) | Peak Hight (mAU) | Peak Area (%) |
|------|-------------------|----------------------|-------------------|------------------|---------------|
| 1    | PDA 254 nm        | 17.648               | 18027790          | 876428           | 94.128        |
| 2    | PDA 254 nm        | 19.043               | 1124725           | 32338            | 5.872         |

The **enantiomeric excess** was determined by HPLC with an IC-H column (*n*-hexane/*i*-PrOH = 85/15, flow rate 1.0 mL/min,  $\lambda = 254$  nm),  $t_R = 25.472$  min (major),  $t_R = 33.676$  min (minor), 90% ee.

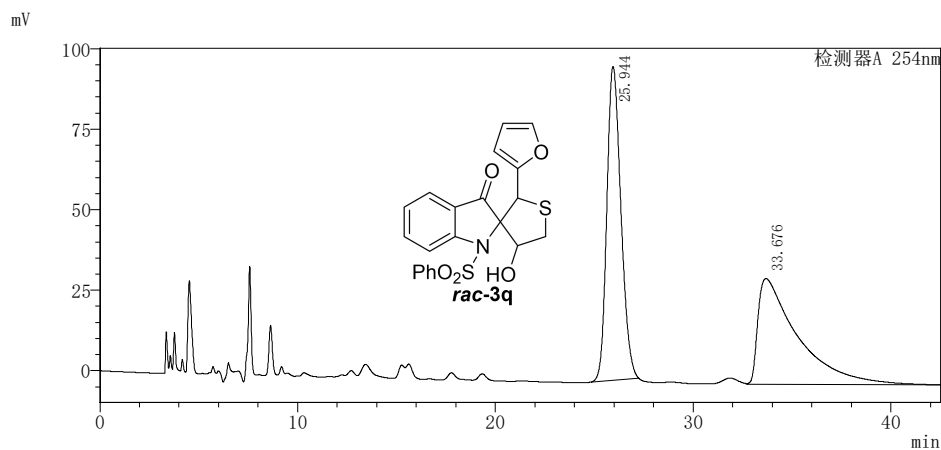

| Peak | Processed Channel | Retention Time (min) | Peak Area (mAU*s) | Peak Hight (mAU) | Peak Area (%) |
|------|-------------------|----------------------|-------------------|------------------|---------------|
| 1    | PDA 254 nm        | 25.944               | 4817347           | 97457            | 51.124        |
| 2    | PDA 254 nm        | 33.676               | 4605447           | 32790            | 48.876        |

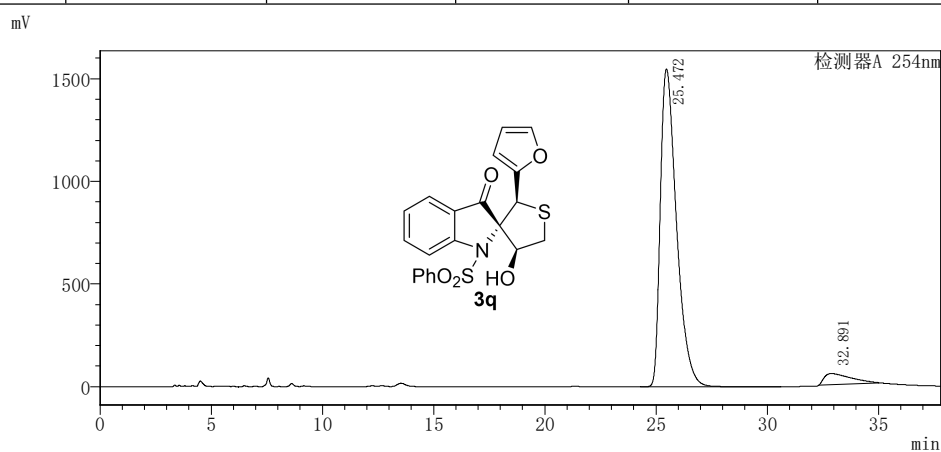

| Peak | Processed Channel | Retention Time (min) | Peak Area (mAU*s) | Peak Hight (mAU) | Peak Area (%) |
|------|-------------------|----------------------|-------------------|------------------|---------------|
| 1    | PDA 254 nm        | 25.472               | 78661042          | 1549622          | 94.756        |
| 2    | PDA 254 nm        | 33.676               | 4353399           | 53273            | 5.244         |



The **enantiomeric excess** was determined by HPLC with an IC-H column (*n*-hexane/*i*-PrOH = 85/15, flow rate 1.0 mL/min,  $\lambda = 254$  nm),  $t_R = 17.153$  min (minor),  $t_R = 18.729$  min (major), 93% ee.

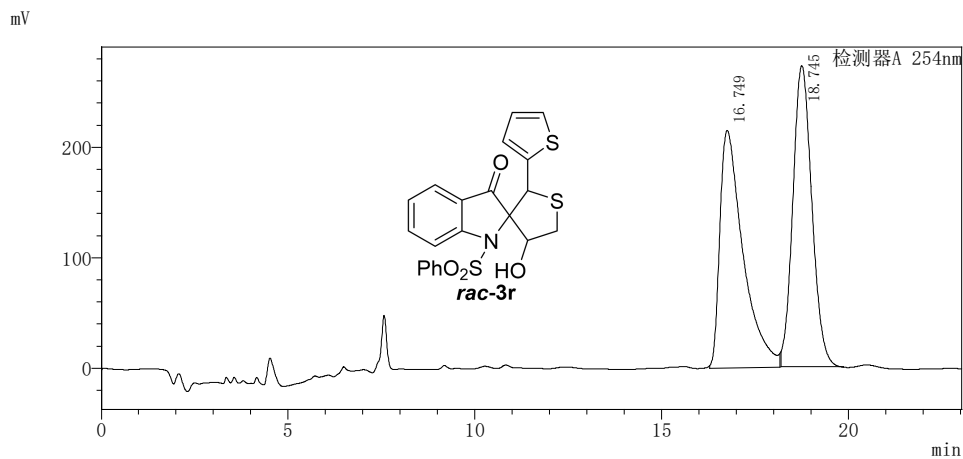

| Peak | Processed Channel | Retention Time (min) | Peak Area (mAU*s) | Peak Hight (mAU) | Peak Area (%) |
|------|-------------------|----------------------|-------------------|------------------|---------------|
| 1    | PDA 254 nm        | 16.749               | 9298646           | 215146           | 49.171        |
| 2    | PDA 254 nm        | 18.745               | 9612048           | 272437           | 50.829        |

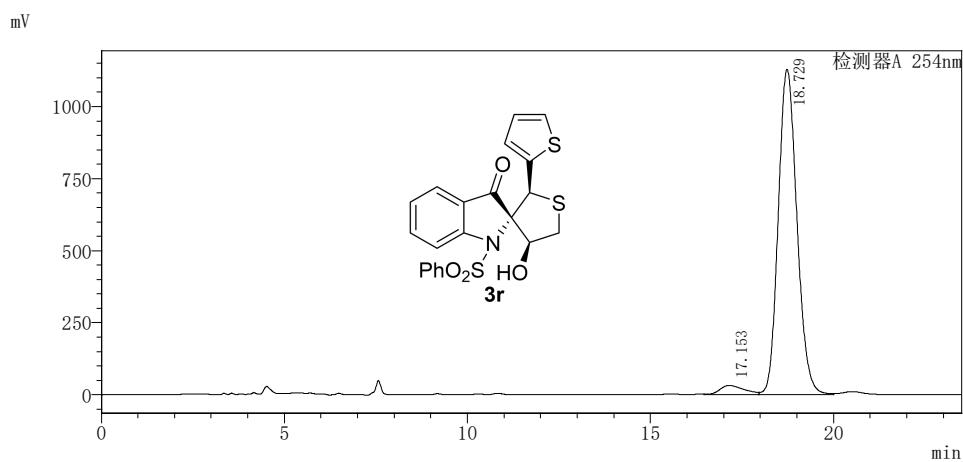

| Peak | Processed Channel | Retention Time (min) | Peak Area (mAU*s) | Peak Hight (mAU) | Peak Area (%) |
|------|-------------------|----------------------|-------------------|------------------|---------------|
| 1    | PDA 254 nm        | 17.153               | 1478660           | 31763            | 3.560         |
| 2    | PDA 254 nm        | 18.729               | 40052871          | 1129247          | 96.440        |

The **enantiomeric excess** was determined by HPLC with an IC-H column (*n*-hexane/*i*-PrOH = 90/10, flow rate 1.0 mL/min,  $\lambda = 254$  nm),  $t_R = 15.636$  min (major),  $t_R = 19.194$  min (minor), 93% ee.

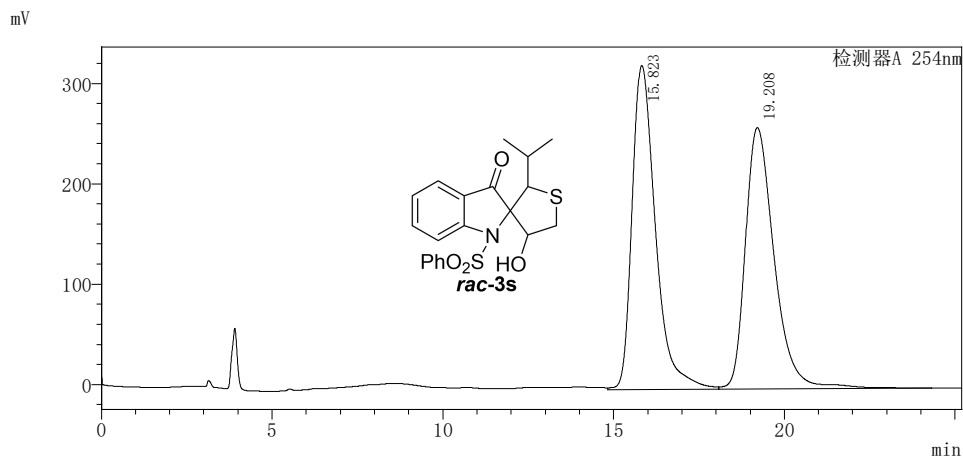

| Peak | Processed Channel | Retention Time (min) | Peak Area (mAU*s) | Peak Height (mAU) | Peak Area (%) |
|------|-------------------|----------------------|-------------------|-------------------|---------------|
| 1    | PDA 254 nm        | 15.823               | 15389161          | 322920            | 50.159        |
| 2    | PDA 254 nm        | 19.208               | 15291715          | 260483            | 49.841        |

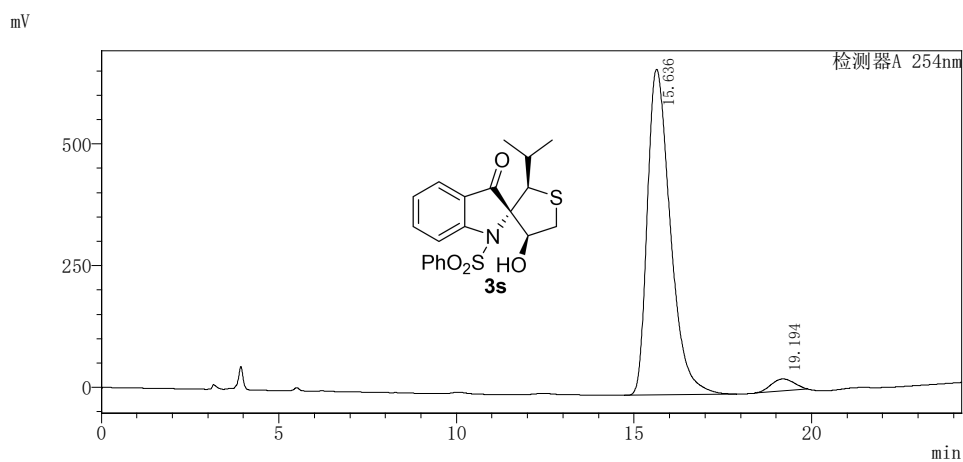

| Peak | Processed Channel | Retention Time (min) | Peak Area (mAU*s) | Peak Height (mAU) | Peak Area (%) |
|------|-------------------|----------------------|-------------------|-------------------|---------------|
| 1    | PDA 254 nm        | 15.636               | 30168624          | 668874            | 96.528        |
| 2    | PDA 254 nm        | 19.194               | 1085162           | 24269             | 3.472         |

The **enantiomeric excess** was determined by HPLC with an IC-H column (*n*-hexane/*i*-PrOH = 90/10, flow rate 1.0 mL/min,  $\lambda = 254$  nm),  $t_R = 9.548$  min (minor),  $t_R = 12.115$  min (major), 87% ee.

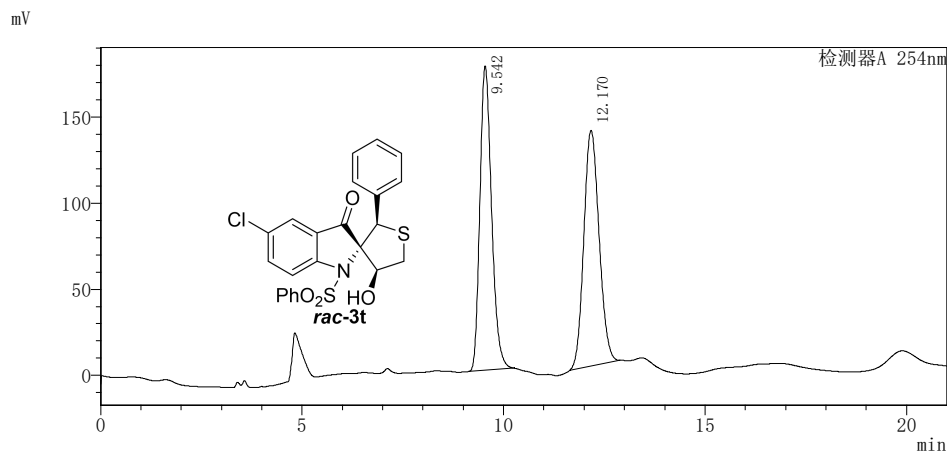

| Peak | Processed Channel | Retention Time (min) | Peak Area (mAU*s) | Peak Hight (mAU) | Peak Area (%) |
|------|-------------------|----------------------|-------------------|------------------|---------------|
| 1    | PDA 254 nm        | 9.542                | 3554720           | 176626           | 49.754        |
| 2    | PDA 254 nm        | 12.170               | 3589816           | 136693           | 50.246        |

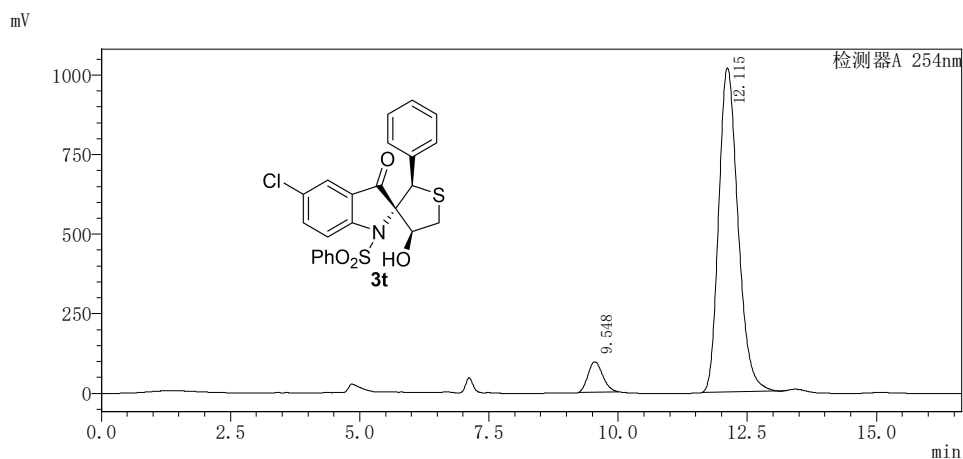

| Peak | Processed Channel | Retention Time (min) | Peak Area (mAU*s) | Peak Hight (mAU) | Peak Area (%) |
|------|-------------------|----------------------|-------------------|------------------|---------------|
| 1    | PDA 254 nm        | 9.548                | 1884981           | 95581            | 6.654         |
| 2    | PDA 254 nm        | 12.115               | 26444312          | 1019125          | 93.346        |

The **enantiomeric excess** was determined by HPLC with an IC-H column (*n*-hexane/*i*-PrOH = 90/10, flow rate 1.0 mL/min,  $\lambda = 254$  nm),  $t_R = 10.166$  min (minor),  $t_R = 12.802$  min (major), 70% ee.

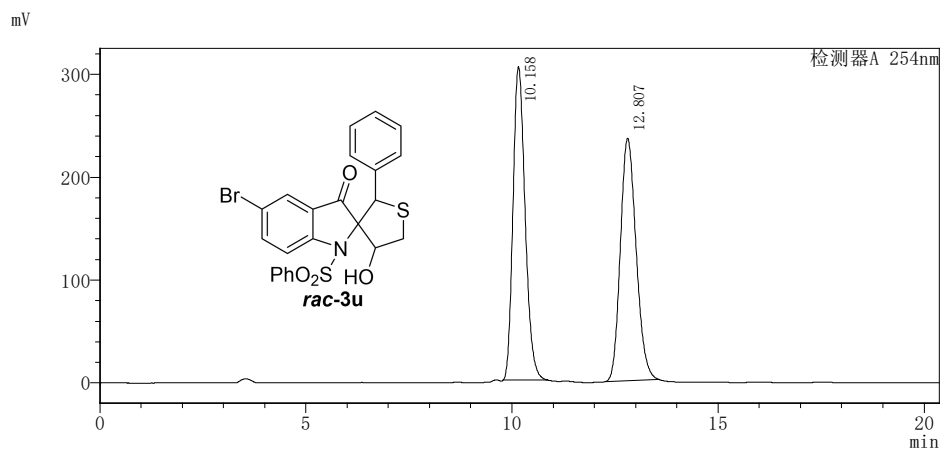

| Peak | Processed Channel | Retention Time (min) | Peak Area (mAU*s) | Peak Hight (mAU) | Peak Area (%) |
|------|-------------------|----------------------|-------------------|------------------|---------------|
| 1    | PDA 254 nm        | 10.158               | 6246228           | 304947           | 50.00         |
| 2    | PDA 254 nm        | 12.807               | 6246351           | 235651           | 50.00         |

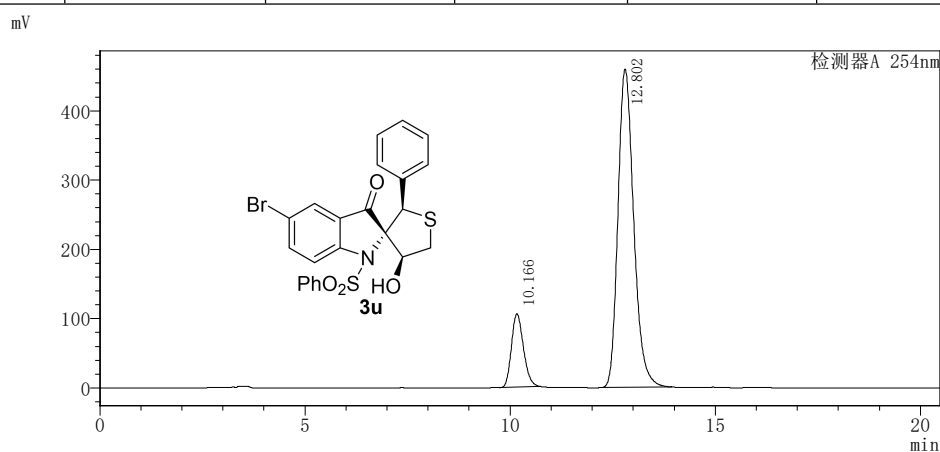

| Peak | Processed Channel | Retention Time (min) | Peak Area (mAU*s) | Peak Hight (mAU) | Peak Area (%) |
|------|-------------------|----------------------|-------------------|------------------|---------------|
| 1    | PDA 254 nm        | 10.166               | 2159148           | 106038           | 14.952        |
| 2    | PDA 254 nm        | 12.802               | 12281383          | 459647           | 85.048        |

The **enantiomeric excess** was determined by HPLC with an IC-H column (*n*-hexane/*i*-PrOH = 90/10, flow rate 1.0 mL/min,  $\lambda = 254$  nm),  $t_R = 17.718$  min (minor),  $t_R = 21.523$  min (major), 85% ee.

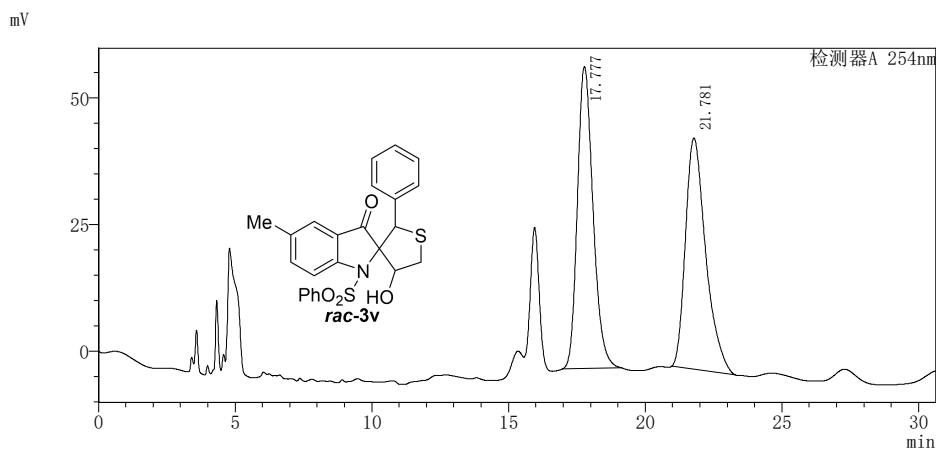

| Peak | Processed Channel | Retention Time (min) | Peak Area (mAU*s) | Peak Hight (mAU) | Peak Area (%) |
|------|-------------------|----------------------|-------------------|------------------|---------------|
| 1    | PDA 254 nm        | 17.777               | 2367217           | 59600            | 50.130        |
| 2    | PDA 254 nm        | 21.781               | 2354946           | 45623            | 49.870        |

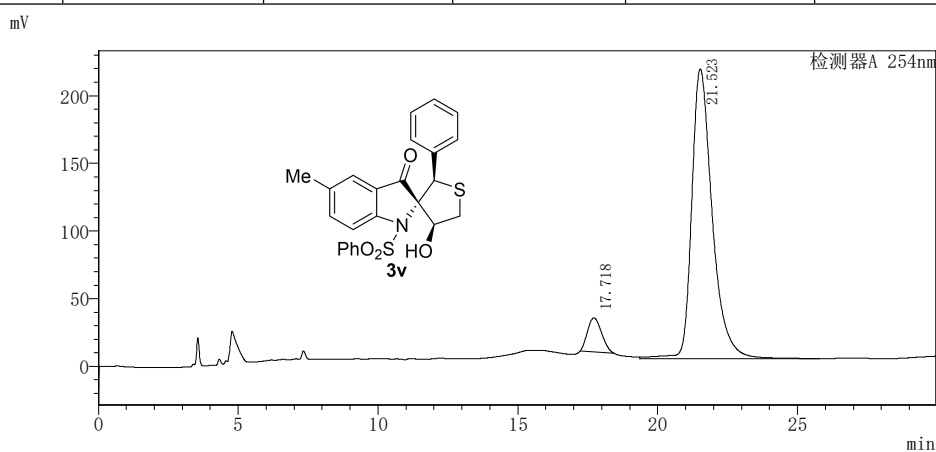

| Peak | Processed Channel | Retention Time (min) | Peak Area (mAU*s) | Peak Hight (mAU) | Peak Area (%) |
|------|-------------------|----------------------|-------------------|------------------|---------------|
| 1    | PDA 254 nm        | 17.718               | 878742            | 25193            | 7.413         |
| 2    | PDA 254 nm        | 21.523               | 10975252          | 214277           | 92.587        |

The **enantiomeric excess** was determined by HPLC with an IC-H column (*n*-hexane/*i*-PrOH = 90/10, flow rate 1.0 mL/min,  $\lambda = 254$  nm),  $t_R = 22.434$  min (minor),  $t_R = 30.381$  min (major), 82% ee ([recrystallization up to 96% ee](#)).

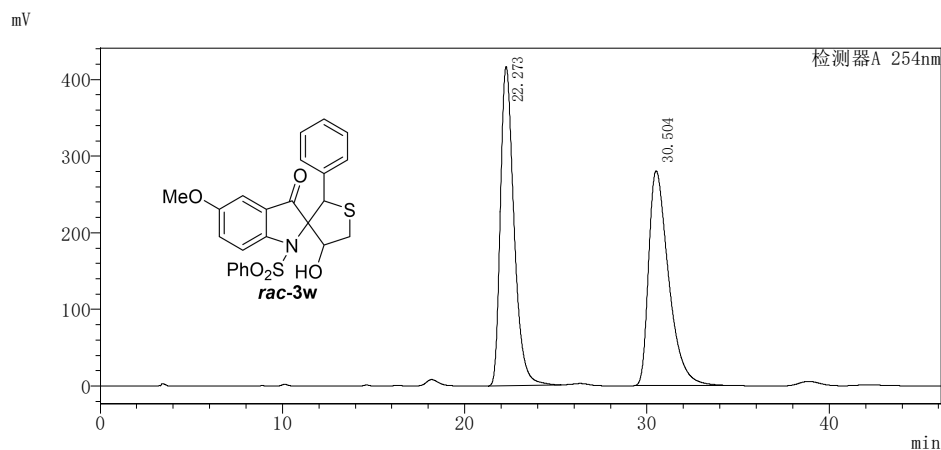

| Peak | Processed Channel | Retention Time (min) | Peak Area (mAU*s) | Peak Hight (mAU) | Peak Area (%) |
|------|-------------------|----------------------|-------------------|------------------|---------------|
| 1    | PDA 254 nm        | 22.273               | 21632795          | 416744           | 50.411        |
| 2    | PDA 254 nm        | 30.504               | 21279743          | 280193           | 49.589        |

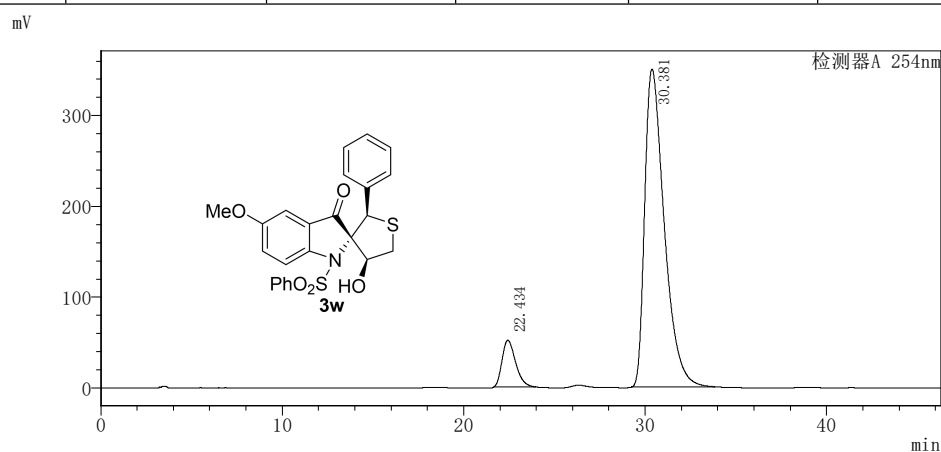

| Peak | Processed Channel | Retention Time (min) | Peak Area (mAU*s) | Peak Hight (mAU) | Peak Area (%) |
|------|-------------------|----------------------|-------------------|------------------|---------------|
| 1    | PDA 254 nm        | 22.434               | 2660299           | 51408            | 9.213         |
| 2    | PDA 254 nm        | 30.381               | 26215435          | 350406           | 90.787        |

**Liquid phase of 3w:** the **enantiomeric excess** was determined by HPLC with an IC-H column (*n*-hexane/*i*-PrOH = 90/10, flow rate 1.0 mL/min,  $\lambda = 254$  nm),  $t_R = 22.186$  min (minor),  $t_R = 29.800$  min (major), 96% ee.

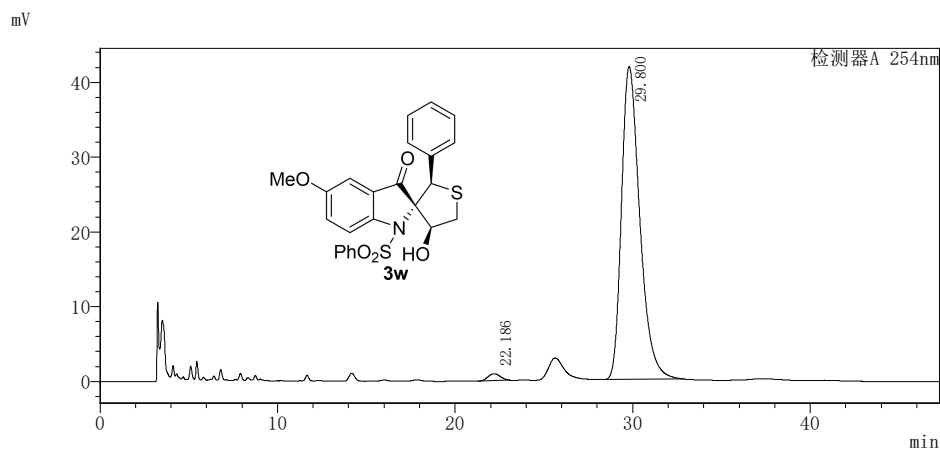

| Peak | Processed Channel | Retention Time (min) | Peak Area (mAU*s) | Peak Hight (mAU) | Peak Area (%) |
|------|-------------------|----------------------|-------------------|------------------|---------------|
| 1    | PDA 254 nm        | 22.186               | 44127             | 932              | 1.449         |
| 2    | PDA 254 nm        | 29.800               | 3000233           | 41854            | 98.551        |

**Solid phase of 3w:** the **enantiomeric excess** was determined by HPLC with an IC-H column (*n*-hexane/*i*-PrOH = 90/10, flow rate 1.0 mL/min,  $\lambda = 254$  nm),  $t_R = 22.216$  min (minor),  $t_R = 29.926$  min (major), 68% ee.

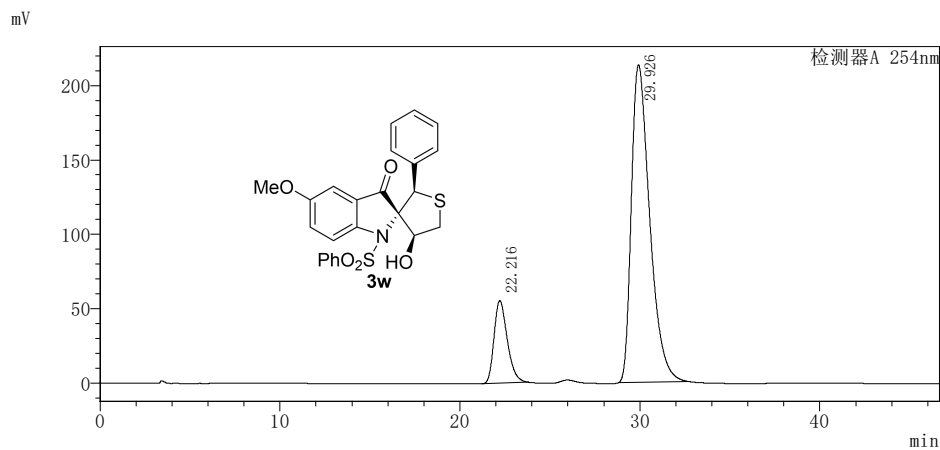

| Peak | Processed Channel | Retention Time (min) | Peak Area (mAU*s) | Peak Hight (mAU) | Peak Area (%) |
|------|-------------------|----------------------|-------------------|------------------|---------------|
| 1    | PDA 254 nm        | 22.216               | 2846881           | 55563            | 15.802        |
| 2    | PDA 254 nm        | 29.926               | 15169171          | 213770           | 84.198        |

The **enantiomeric excess** was determined by HPLC with an IC-H column (*n*-hexane/*i*-PrOH = 90/10, flow rate 1.0 mL/min,  $\lambda = 254$  nm),  $t_R = 18.631$  min (major),  $t_R = 23.023$  min (minor), 86% ee.

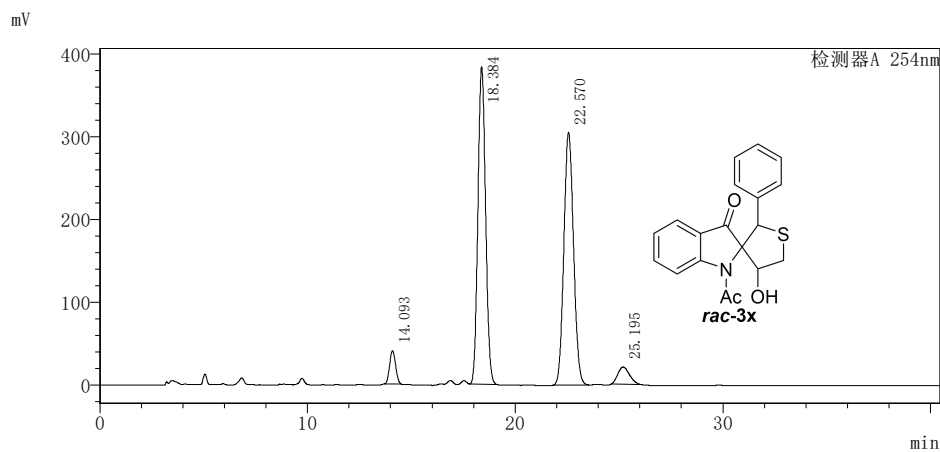

| Peak | Processed Channel | Retention Time (min) | Peak Area (mAU*s) | Peak Height (mAU) | Peak Area (%) |
|------|-------------------|----------------------|-------------------|-------------------|---------------|
| 1    | PDA 254 nm        | 14.093               | 800184            | 40163             | 3.751         |
| 2    | PDA 254 nm        | 18.384               | 9839368           | 384144            | 46.128        |
| 3    | PDA 254 nm        | 22.570               | 9883945           | 305111            | 46.337        |
| 4    | PDA 254 nm        | 25.195               | 807213            | 20743             | 3.784         |

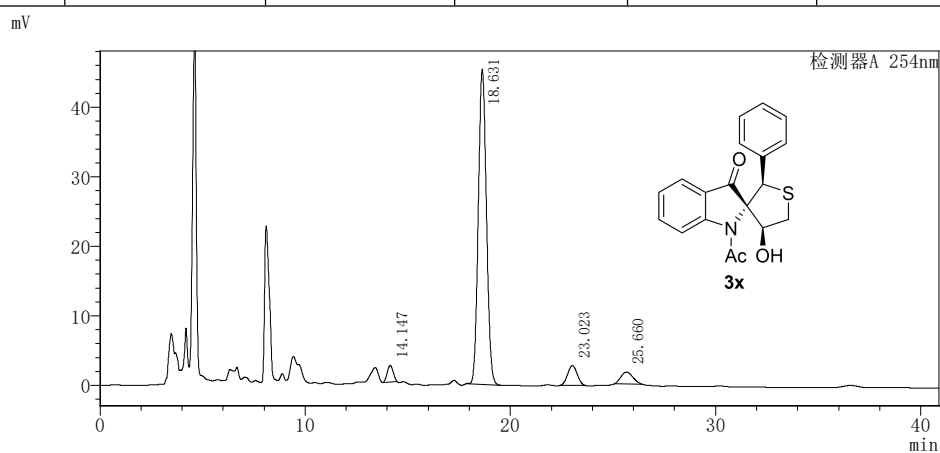

| Peak | Processed Channel | Retention Time (min) | Peak Area (mAU*s) | Peak Height (mAU) | Peak Area (%) |
|------|-------------------|----------------------|-------------------|-------------------|---------------|
| 1    | PDA 254 nm        | 14.147               | 47313             | 2346              | 3.250         |
| 2    | PDA 254 nm        | 18.631               | 1247332           | 45339             | 85.685        |
| 3    | PDA 254 nm        | 23.023               | 91711             | 2840              | 6.300         |
| 4    | PDA 254 nm        | 25.660               | 69354             | 1706              | 4.764         |



**1x' (E)** replaces **1x (Z)** to synthesize **3x** under standard conditions: the **enantiomeric excess** was determined by HPLC with an IC-H column (*n*-hexane/*i*-PrOH = 90/10, flow rate 1.0 mL/min,  $\lambda = 254$  nm),  $t_R = 18.439$  min (major),  $t_R = 23.665$  min (minor), 58% ee.

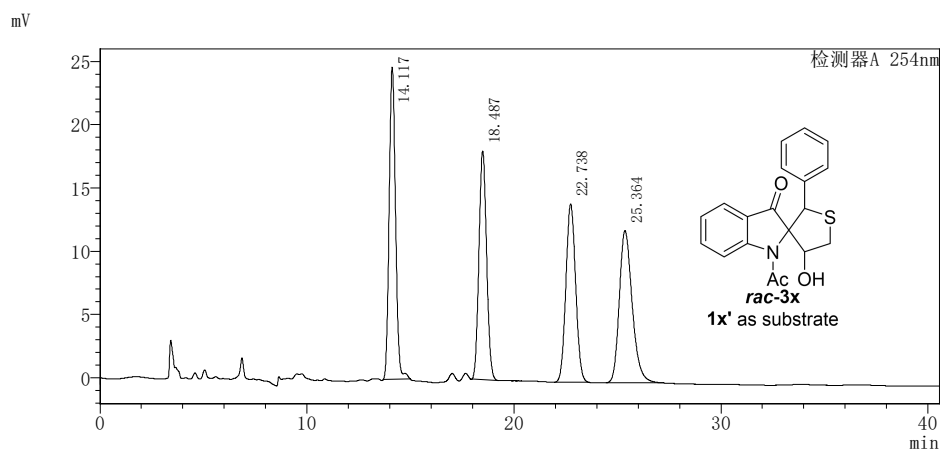

| Peak | Processed Channel | Retention Time (min) | Peak Area (mAU*s) | Peak Hight (mAU) | Peak Area (%) |
|------|-------------------|----------------------|-------------------|------------------|---------------|
| 1    | PDA 254 nm        | 14.117               | 528189            | 24689            | 26.740        |
| 2    | PDA 254 nm        | 18.487               | 463984            | 18081            | 23.489        |
| 3    | PDA 254 nm        | 23.738               | 460823            | 14083            | 23.329        |
| 4    | PDA 254 nm        | 25.364               | 522301            | 12028            | 26.442        |

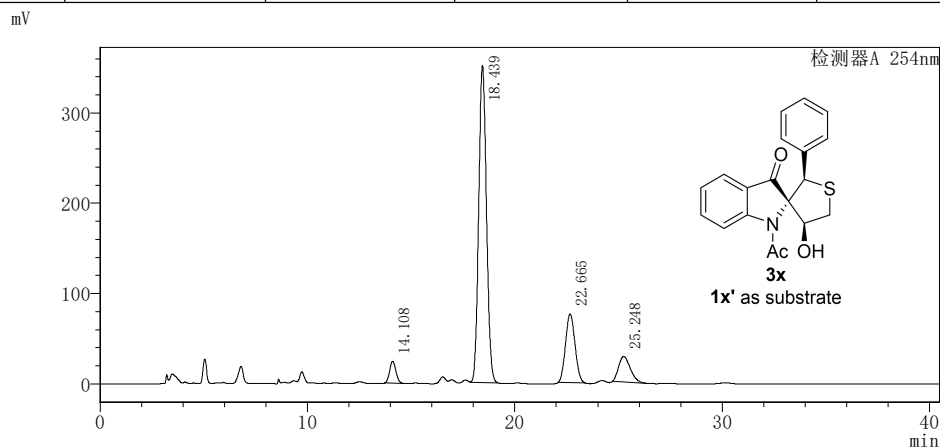

| Peak | Processed Channel | Retention Time (min) | Peak Area (mAU*s) | Peak Hight (mAU) | Peak Area (%) |
|------|-------------------|----------------------|-------------------|------------------|---------------|
| 1    | PDA 254 nm        | 14.108               | 507881            | 24408            | 3.864         |
| 2    | PDA 254 nm        | 18.439               | 9102437           | 350972           | 69.256        |
| 3    | PDA 254 nm        | 23.665               | 2421065           | 76137            | 18.421        |
| 4    | PDA 254 nm        | 25.248               | 1111782           | 28266            | 8.459         |

The **enantiomeric excess** was determined by HPLC with an IC-H column (*n*-hexane/*i*-PrOH = 90/10, flow rate 1.0 mL/min,  $\lambda = 254$  nm),  $t_R = 19.308$  min (major),  $t_R = 23.942$  min (minor), 88% ee.

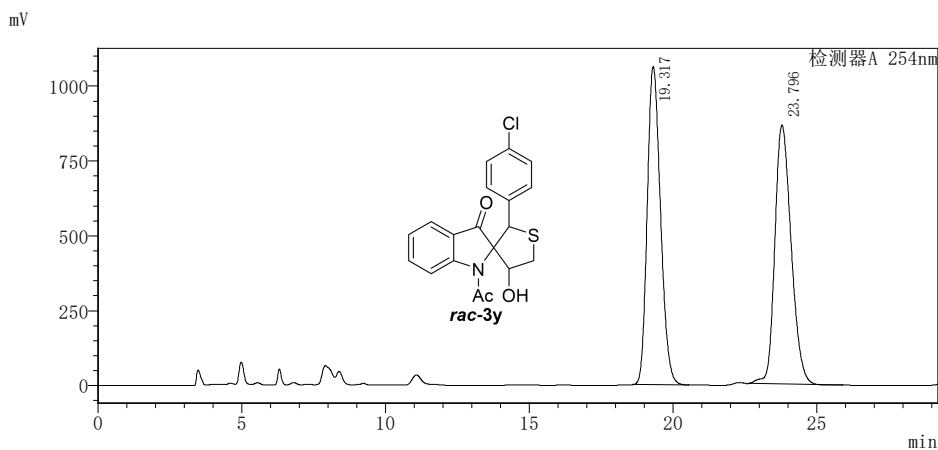

| Peak | Processed Channel | Retention Time (min) | Peak Area (mAU*s) | Peak Hight (mAU) | Peak Area (%) |
|------|-------------------|----------------------|-------------------|------------------|---------------|
| 1    | PDA 254 nm        | 19.317               | 34165233          | 1062937          | 50.018        |
| 2    | PDA 254 nm        | 23.796               | 34140084          | 865135           | 49.982        |

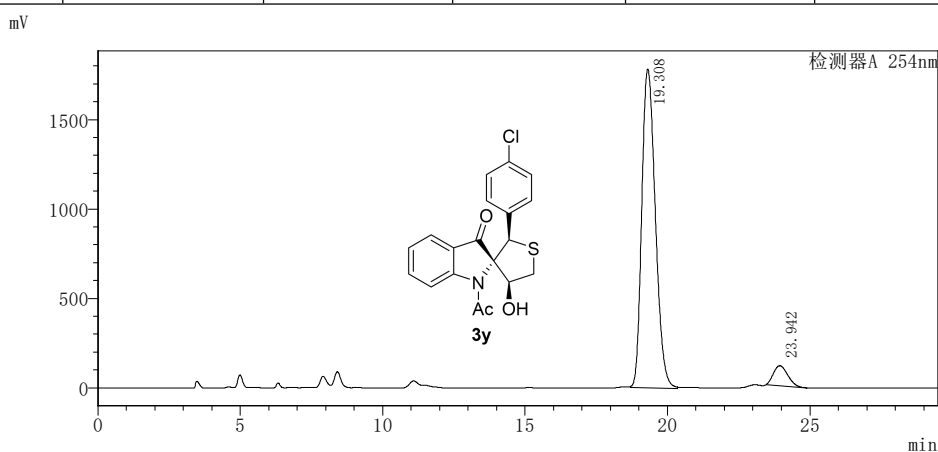

| Peak | Processed Channel | Retention Time (min) | Peak Area (mAU*s) | Peak Hight (mAU) | Peak Area (%) |
|------|-------------------|----------------------|-------------------|------------------|---------------|
| 1    | PDA 254 nm        | 19.308               | 59233615          | 1784230          | 93.829        |
| 2    | PDA 254 nm        | 23.942               | 3895594           | 111821           | 6.171         |

The **enantiomeric excess** was determined by HPLC with an IC-H column (*n*-hexane/*i*-PrOH = 90/10, flow rate 1.0 mL/min,  $\lambda = 254$  nm),  $t_R = 11.380$  min (major),  $t_R = 31.827$  min (minor), 98% ee.

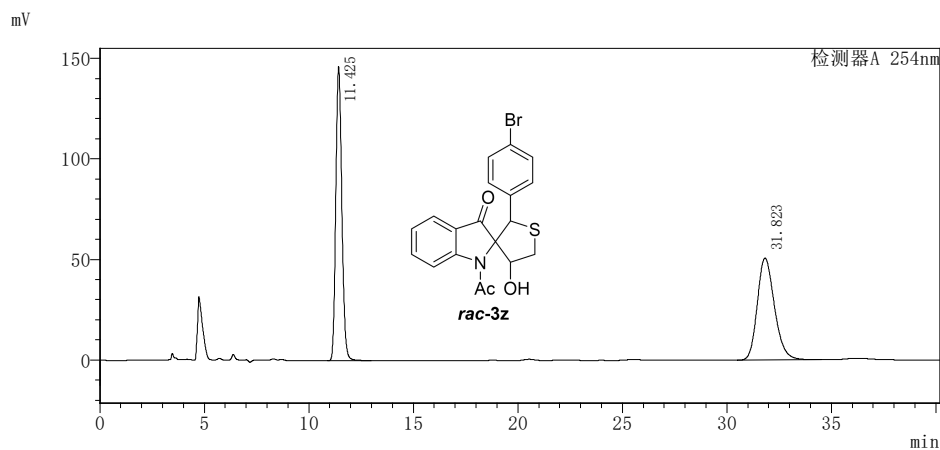

| Peak | Processed Channel | Retention Time (min) | Peak Area (mAU*s) | Peak Hight (mAU) | Peak Area (%) |
|------|-------------------|----------------------|-------------------|------------------|---------------|
| 1    | PDA 254 nm        | 11.425               | 2940787           | 146406           | 50.334        |
| 2    | PDA 254 nm        | 31.823               | 2901764           | 50754            | 49.666        |

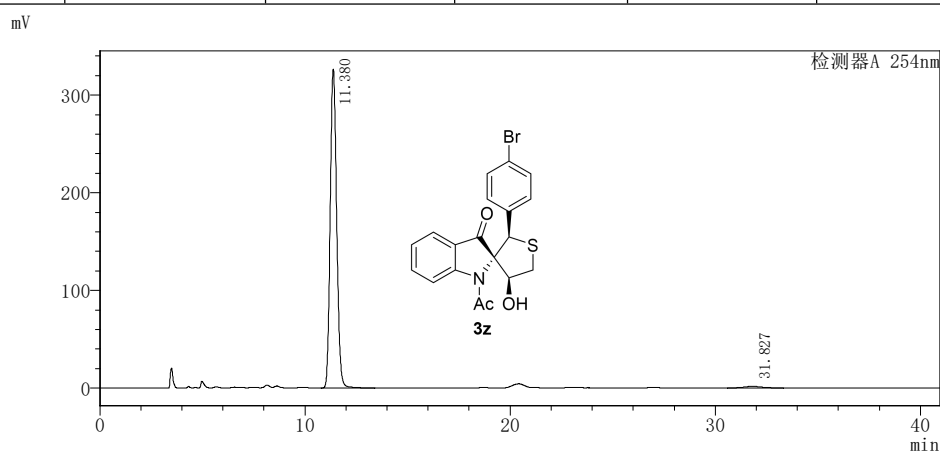

| Peak | Processed Channel | Retention Time (min) | Peak Area (mAU*s) | Peak Hight (mAU) | Peak Area (%) |
|------|-------------------|----------------------|-------------------|------------------|---------------|
| 1    | PDA 254 nm        | 11.380               | 7158449           | 326738           | 98.697        |
| 2    | PDA 254 nm        | 31.827               | 94494             | 1562             | 1.303         |

The **enantiomeric excess** was determined by HPLC with an IA-H column (*n*-hexane/*i*-PrOH = 80/20, flow rate 1.0 mL/min,  $\lambda = 254$  nm),  $t_R = 8.206$  min (major),  $t_R = 16.548$  min (minor), 72% ee.

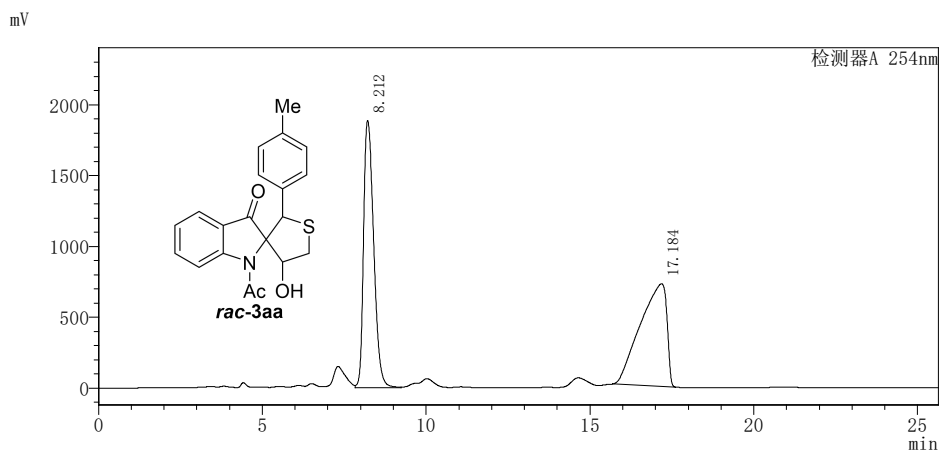

| Peak | Processed Channel | Retention Time (min) | Peak Area (mAU*s) | Peak Hight (mAU) | Peak Area (%) |
|------|-------------------|----------------------|-------------------|------------------|---------------|
| 1    | PDA 254 nm        | 8.212                | 40861779          | 1886099          | 49.965        |
| 2    | PDA 254 nm        | 17.184               | 40918999          | 724713           | 50.035        |

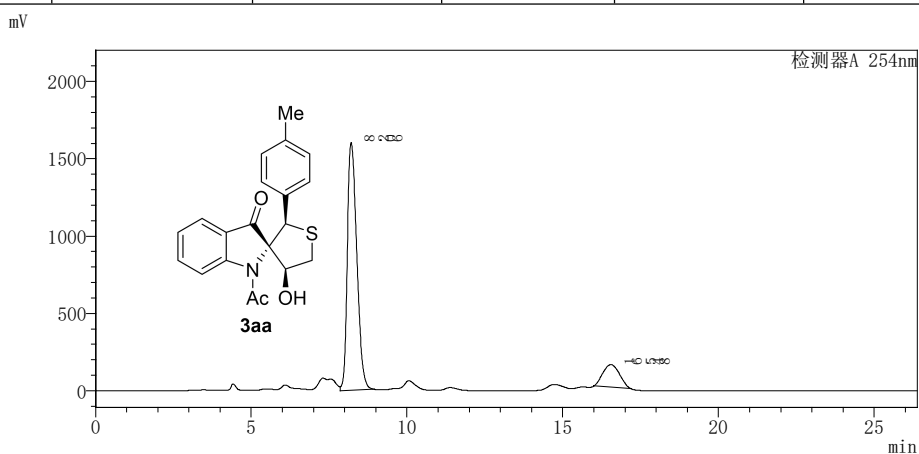

| Peak | Processed Channel | Retention Time (min) | Peak Area (mAU*s) | Peak Hight (mAU) | Peak Area (%) |
|------|-------------------|----------------------|-------------------|------------------|---------------|
| 1    | PDA 254 nm        | 8.206                | 33870919          | 1601666          | 86.160        |
| 2    | PDA 254 nm        | 16.548               | 5440742           | 145790           | 13.840        |

The **enantiomeric excess** was determined by HPLC with an IA-H column (*n*-hexane/*i*-PrOH = 80/20, flow rate 1.0 mL/min,  $\lambda = 254$  nm),  $t_R = 10.952$  min (major),  $t_R = 19.273$  min (minor), 64% ee.

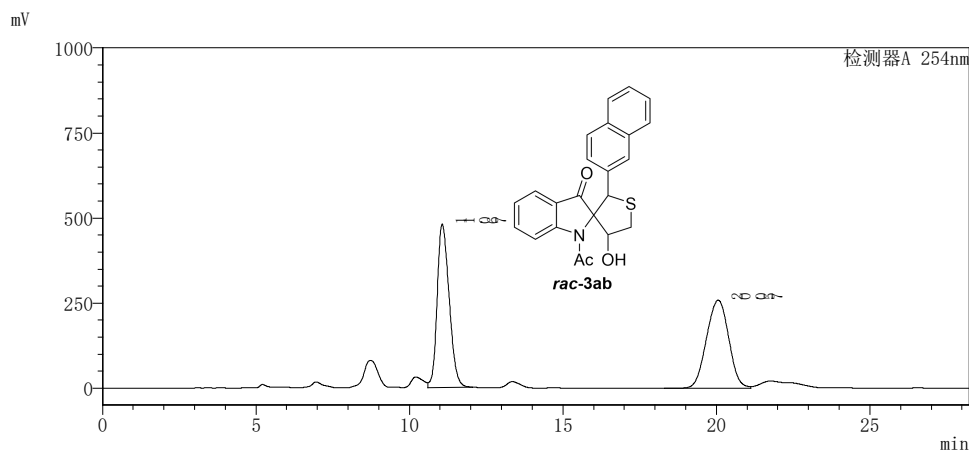

| Peak | Processed Channel | Retention Time (min) | Peak Area (mAU*s) | Peak Hight (mAU) | Peak Area (%) |
|------|-------------------|----------------------|-------------------|------------------|---------------|
| 1    | PDA 254 nm        | 11.067               | 13077501          | 480618           | 50.055        |
| 2    | PDA 254 nm        | 20.057               | 13048998          | 259256           | 49.945        |

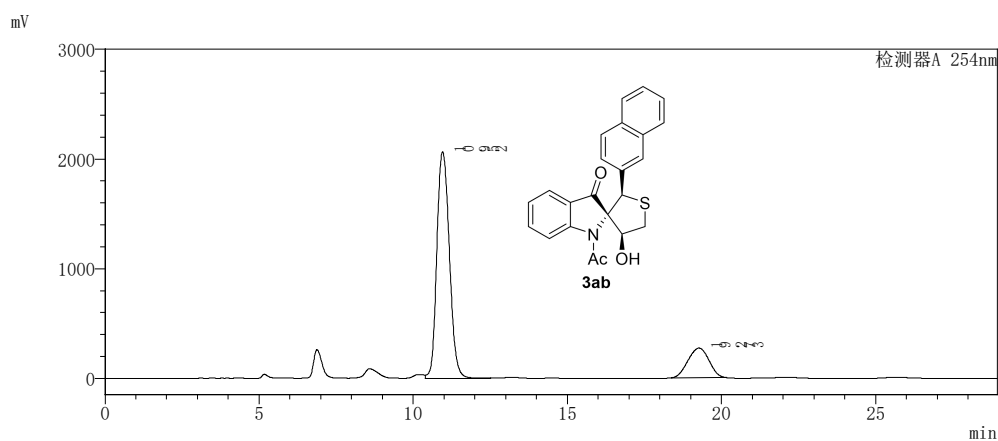

| Peak | Processed Channel | Retention Time (min) | Peak Area (mAU*s) | Peak Hight (mAU) | Peak Area (%) |
|------|-------------------|----------------------|-------------------|------------------|---------------|
| 1    | PDA 254 nm        | 10.952               | 58598857          | 2066145          | 82.063        |
| 2    | PDA 254 nm        | 19.273               | 12808721          | 270557           | 17.937        |

The **enantiomeric excess** was determined by HPLC with an IA-H column (*n*-hexane/*i*-PrOH = 80/20, flow rate 1.0 mL/min,  $\lambda = 254$  nm),  $t_R = 19.425$  min (major),  $t_R = 29.692$  min (minor), 80% ee.

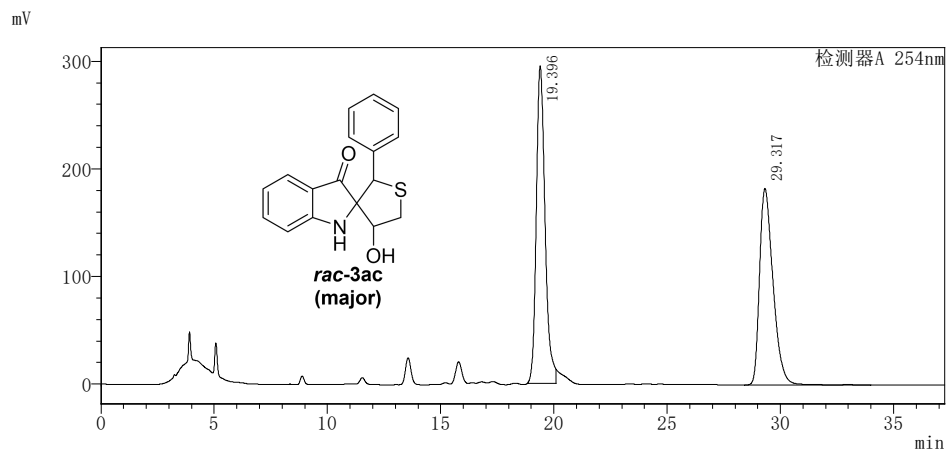

| Peak | Processed Channel | Retention Time (min) | Peak Area (mAU*s) | Peak Hight (mAU) | Peak Area (%) |
|------|-------------------|----------------------|-------------------|------------------|---------------|
| 1    | PDA 254 nm        | 19.396               | 7950426           | 295495           | 51.322        |
| 2    | PDA 254 nm        | 29.317               | 7540792           | 182559           | 48.678        |

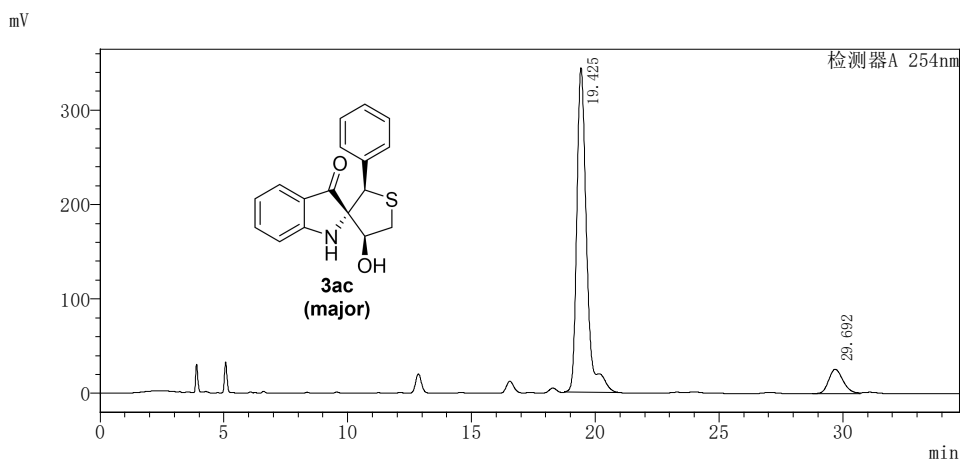

| Peak | Processed Channel | Retention Time (min) | Peak Area (mAU*s) | Peak Hight (mAU) | Peak Area (%) |
|------|-------------------|----------------------|-------------------|------------------|---------------|
| 1    | PDA 254 nm        | 19.425               | 9467171           | 343940           | 90.103        |
| 2    | PDA 254 nm        | 29.692               | 1039921           | 25754            | 9.897         |

The **enantiomeric excess** was determined by HPLC with an IA-H column (*n*-hexane/*i*-PrOH = 80/20, flow rate 1.0 mL/min,  $\lambda = 254$  nm),  $t_R = 19.488$  min (major),  $t_R = 54.733$  min (minor), 81% ee.

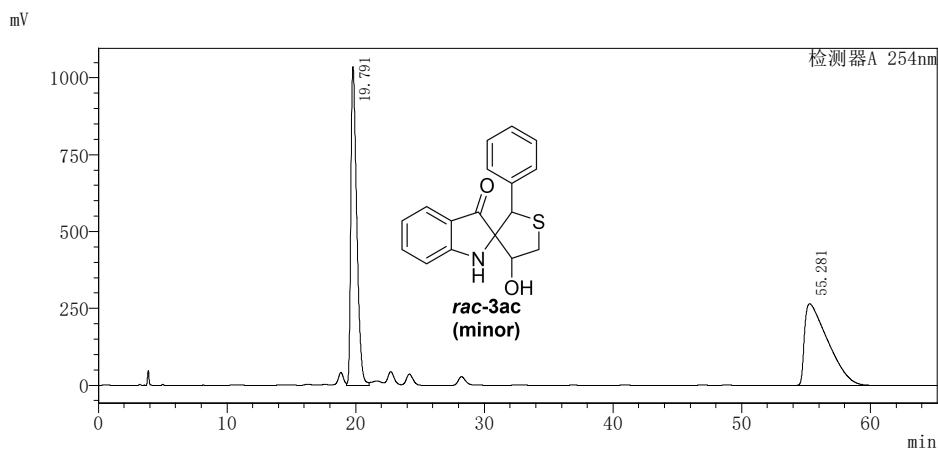

| Peak | Processed Channel | Retention Time (min) | Peak Area (mAU*s) | Peak Hight (mAU) | Peak Area (%) |
|------|-------------------|----------------------|-------------------|------------------|---------------|
| 1    | PDA 254 nm        | 19.791               | 33244290          | 1037857          | 49.527        |
| 2    | PDA 254 nm        | 55.281               | 33879845          | 266427           | 50.473        |

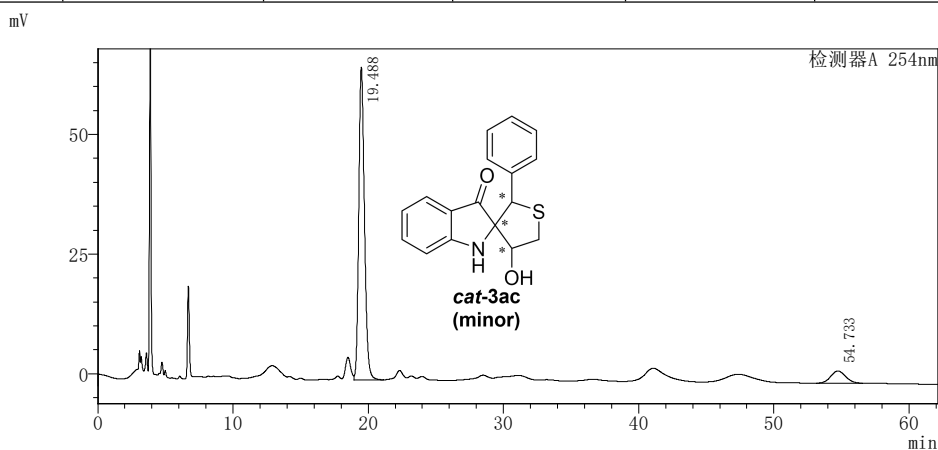

| Peak | Processed Channel | Retention Time (min) | Peak Area (mAU*s) | Peak Hight (mAU) | Peak Area (%) |
|------|-------------------|----------------------|-------------------|------------------|---------------|
| 1    | PDA 254 nm        | 19.488               | 1911938           | 65394            | 90.742        |
| 2    | PDA 254 nm        | 54.733               | 195076            | 2550             | 9.258         |

The **enantiomeric excess** was determined by HPLC with an IA-H column (*n*-hexane/*i*-PrOH = 90/10, flow rate 1.0 mL/min,  $\lambda = 254$  nm),  $t_R = 9.658$  min (major),  $t_R = 10.189$  min (minor), 64% ee.

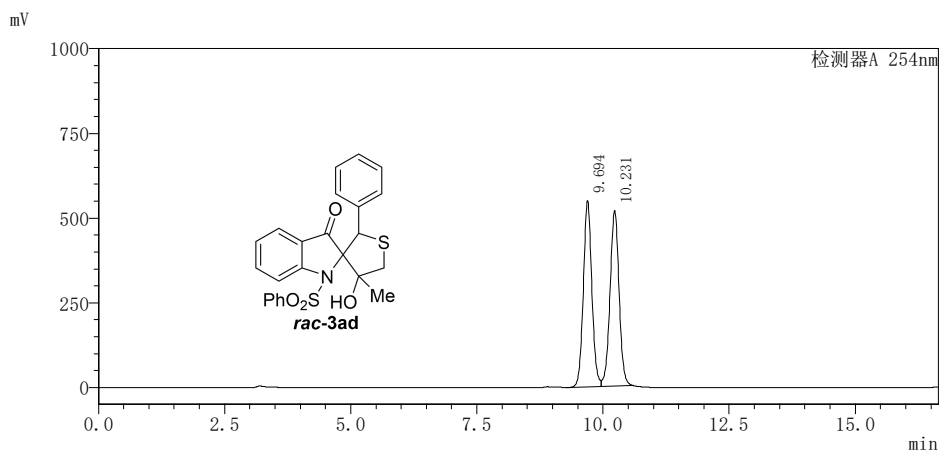

| Peak | Processed Channel | Retention Time (min) | Peak Area (mAU*s) | Peak Hight (mAU) | Peak Area (%) |
|------|-------------------|----------------------|-------------------|------------------|---------------|
| 1    | PDA 254 nm        | 9.694                | 6505287           | 551082           | 50.063        |
| 2    | PDA 254 nm        | 10.231               | 6488926           | 518760           | 49.937        |

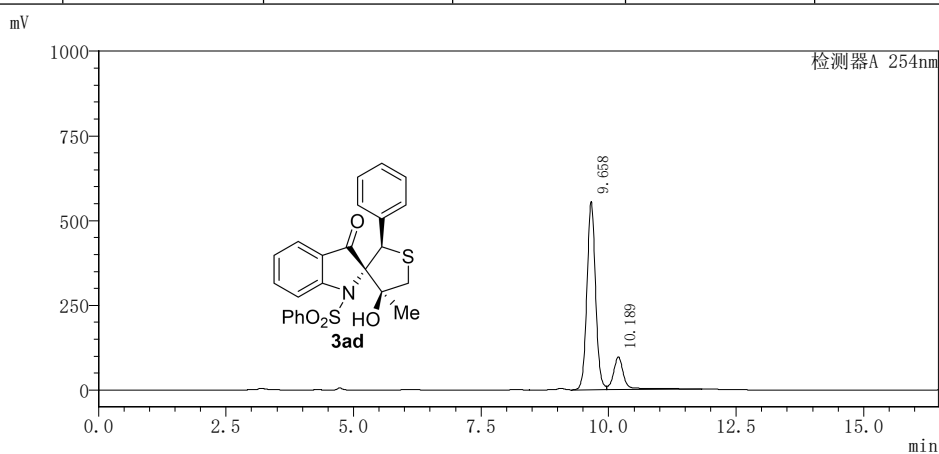

| Peak | Processed Channel | Retention Time (min) | Peak Area (mAU*s) | Peak Hight (mAU) | Peak Area (%) |
|------|-------------------|----------------------|-------------------|------------------|---------------|
| 1    | PDA 254 nm        | 9.658                | 6543747           | 556586           | 81.992        |
| 2    | PDA 254 nm        | 10.189               | 1437244           | 96965            | 18.008        |



The **enantiomeric excess** was determined by HPLC with an IC-H column (*n*-hexane/*i*-PrOH = 90/10, flow rate 1.0 mL/min,  $\lambda = 254$  nm),  $t_R = 18.668$  min (minor),  $t_R = 21.237$  min (major), 63% ee.

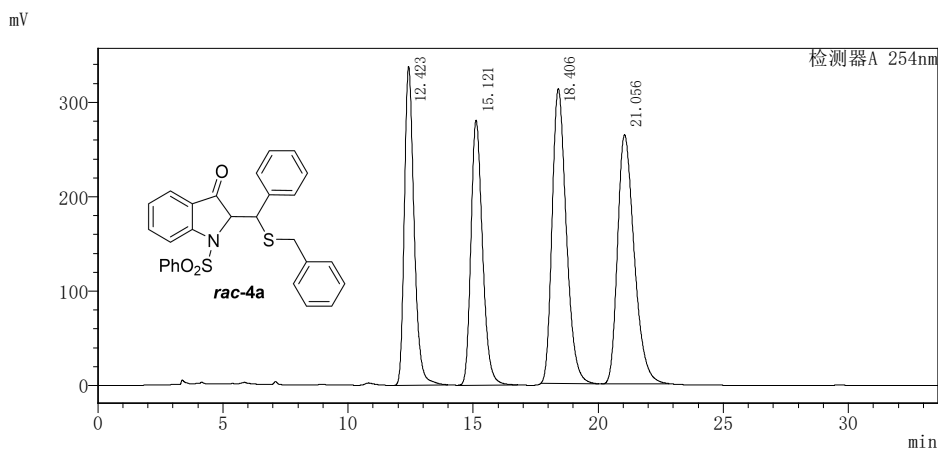

| Peak | Processed Channel | Retention Time (min) | Peak Area (mAU*s) | Peak Hight (mAU) | Peak Area (%) |
|------|-------------------|----------------------|-------------------|------------------|---------------|
| 1    | PDA 254 nm        | 12.423               | 9125321           | 337753           | 21.372        |
| 2    | PDA 254 nm        | 15.121               | 9007892           | 280736           | 21.097        |
| 3    | PDA 254 nm        | 18.406               | 12304223          | 312388           | 28.817        |
| 4    | PDA 254 nm        | 21.056               | 12260269          | 264122           | 28.714        |

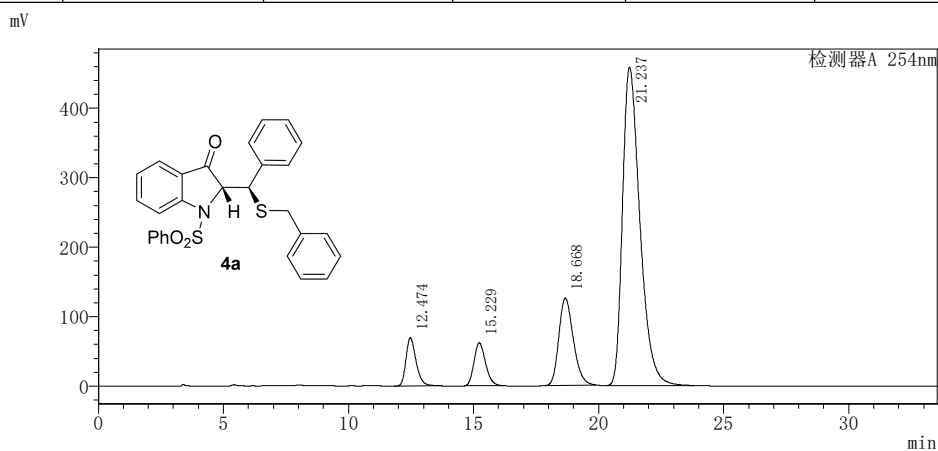

| Peak | Processed Channel | Retention Time (min) | Peak Area (mAU*s) | Peak Hight (mAU) | Peak Area (%) |
|------|-------------------|----------------------|-------------------|------------------|---------------|
| 1    | PDA 254 nm        | 12.474               | 1953417           | 69353            | 6.275         |
| 2    | PDA 254 nm        | 15.229               | 1982232           | 61730            | 6.368         |
| 3    | PDA 254 nm        | 18.668               | 5042943           | 125449           | 16.200        |
| 4    | PDA 254 nm        | 21.237               | 22150743          | 458390           | 71.157        |

The **enantiomeric excess** was determined by HPLC with an IC-H column (*n*-hexane/*i*-PrOH = 90/10, flow rate 1.0 mL/min,  $\lambda = 254$  nm),  $t_R = 10.850$  min (minor),  $t_R = 14.017$  min (major), 58% ee.

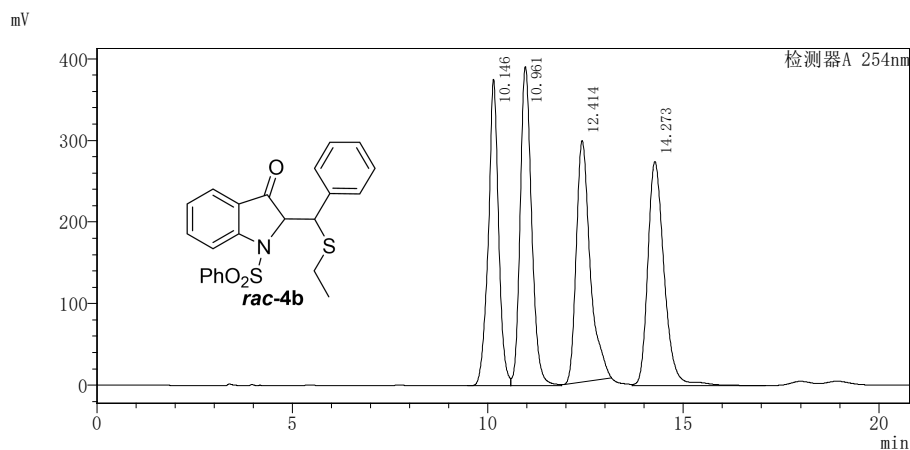

| Peak | Processed Channel | Retention Time (min) | Peak Area (mAU*s) | Peak Height (mAU) | Peak Area (%) |
|------|-------------------|----------------------|-------------------|-------------------|---------------|
| 1    | PDA 254 nm        | 10.146               | 6885713           | 375764            | 22.803        |
| 2    | PDA 254 nm        | 10.961               | 7989998           | 391316            | 26.459        |
| 3    | PDA 254 nm        | 12.414               | 7329113           | 296009            | 24.271        |
| 4    | PDA 254 nm        | 14.273               | 7992440           | 274785            | 26.467        |

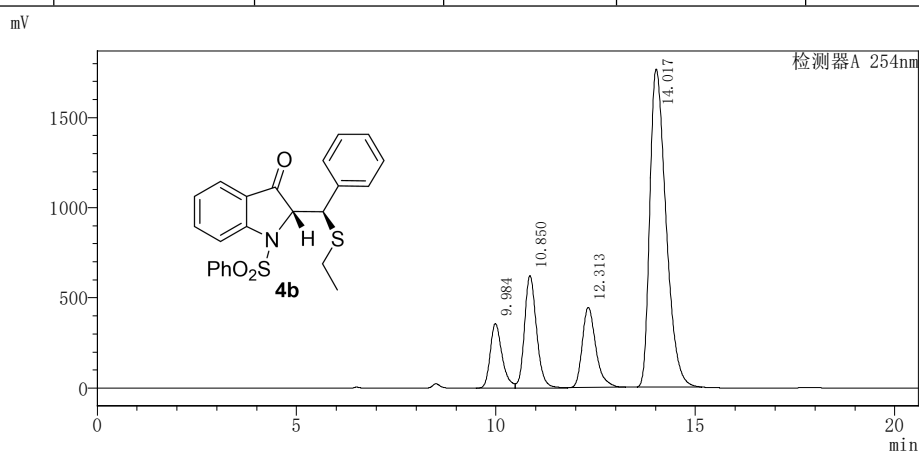

| Peak | Processed Channel | Retention Time (min) | Peak Area (mAU*s) | Peak Height (mAU) | Peak Area (%) |
|------|-------------------|----------------------|-------------------|-------------------|---------------|
| 1    | PDA 254 nm        | 9.984                | 7479342           | 359695            | 9.240         |
| 2    | PDA 254 nm        | 10.850               | 13277616          | 625266            | 16.403        |
| 3    | PDA 254 nm        | 12.313               | 10472245          | 444262            | 12.937        |
| 4    | PDA 254 nm        | 14.017               | 49717277          | 1762643           | 61.420        |

The **enantiomeric excess** was determined by HPLC with an IB-H column (*n*-hexane/*i*-PrOH = 90/10, flow rate 0.7 mL/min,  $\lambda = 254$  nm),  $t_R = 19.248$  min (minor),  $t_R = 22.366$  min (major), 14% ee.

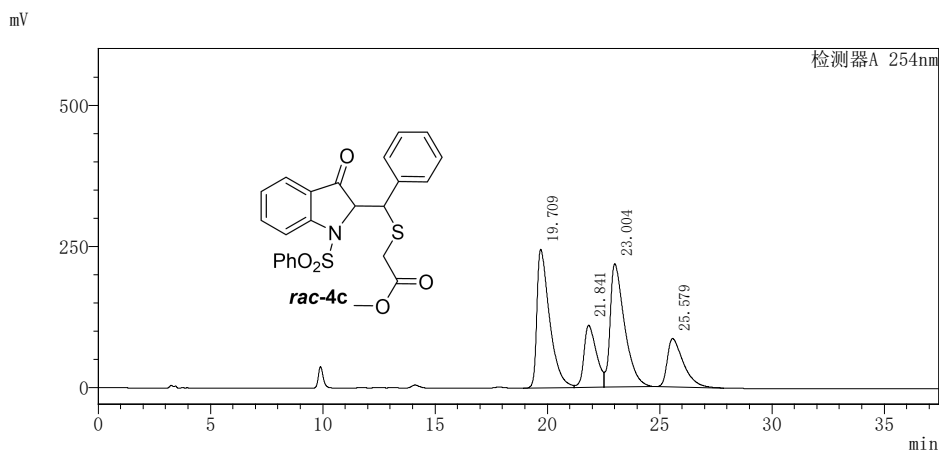

| Peak | Processed Channel | Retention Time (min) | Peak Area (mAU*s) | Peak Hight (mAU) | Peak Area (%) |
|------|-------------------|----------------------|-------------------|------------------|---------------|
| 1    | PDA 254 nm        | 19.709               | 9677550           | 245743           | 34.498        |
| 2    | PDA 254 nm        | 21.841               | 4287559           | 110201           | 15.284        |
| 3    | PDA 254 nm        | 23.004               | 9783248           | 218736           | 34.874        |
| 4    | PDA 254 nm        | 25.579               | 4304364           | 85925            | 15.344        |

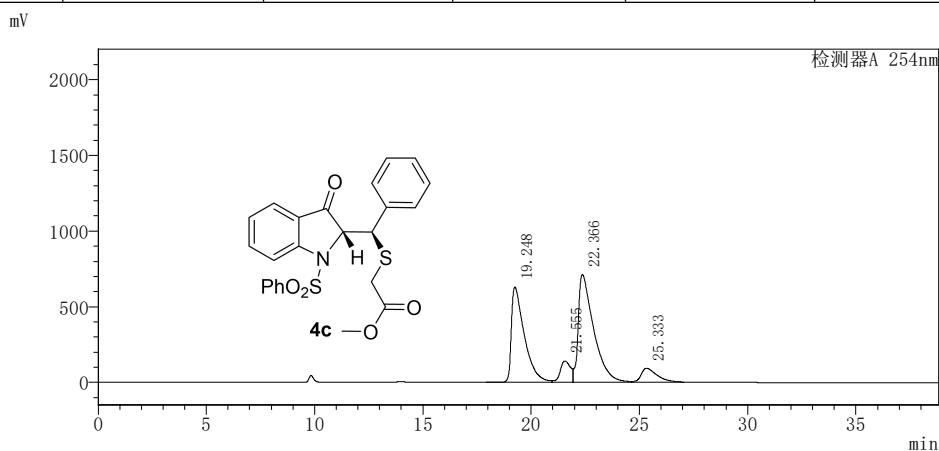

| Peak | Processed Channel | Retention Time (min) | Peak Area (mAU*s) | Peak Hight (mAU) | Peak Area (%) |
|------|-------------------|----------------------|-------------------|------------------|---------------|
| 1    | PDA 254 nm        | 19.248               | 26187197          | 630271           | 37.121        |
| 2    | PDA 254 nm        | 21.555               | 4658416           | 140720           | 6.603         |
| 3    | PDA 254 nm        | 22.366               | 35072658          | 711453           | 49.717        |
| 4    | PDA 254 nm        | 25.333               | 4626854           | 91699            | 6.559         |

The **enantiomeric excess** was determined by HPLC with an IA-H column (*n*-hexane/*i*-PrOH = 80/20, flow rate 0.7 mL/min,  $\lambda = 254$  nm),  $t_R = 20.161$  min (minor),  $t_R = 30.441$  min (major), 84% ee.

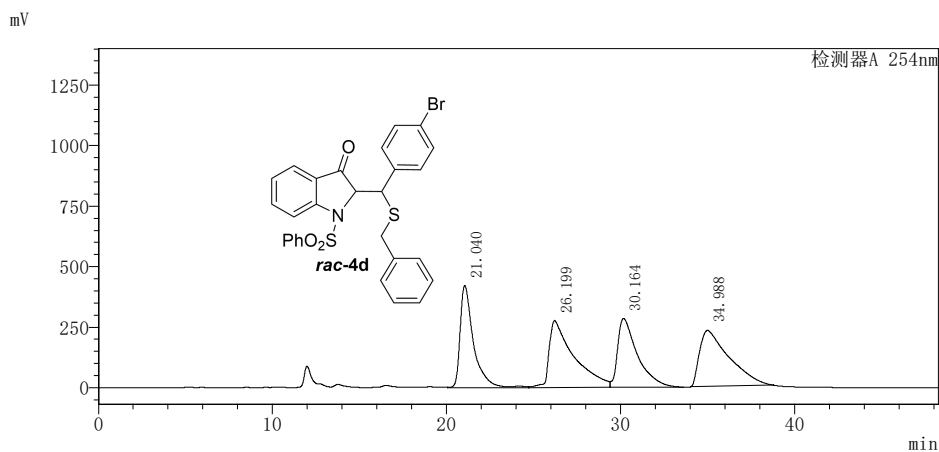

| Peak | Processed Channel | Retention Time (min) | Peak Area (mAU*s) | Peak Height (mAU) | Peak Area (%) |
|------|-------------------|----------------------|-------------------|-------------------|---------------|
| 1    | PDA 254 nm        | 21.040               | 22599816          | 422912            | 22.653        |
| 2    | PDA 254 nm        | 26.199               | 27245127          | 276781            | 27.309        |
| 3    | PDA 254 nm        | 30.164               | 22497032          | 284823            | 22.550        |
| 4    | PDA 254 nm        | 34.988               | 27423067          | 232320            | 27.488        |

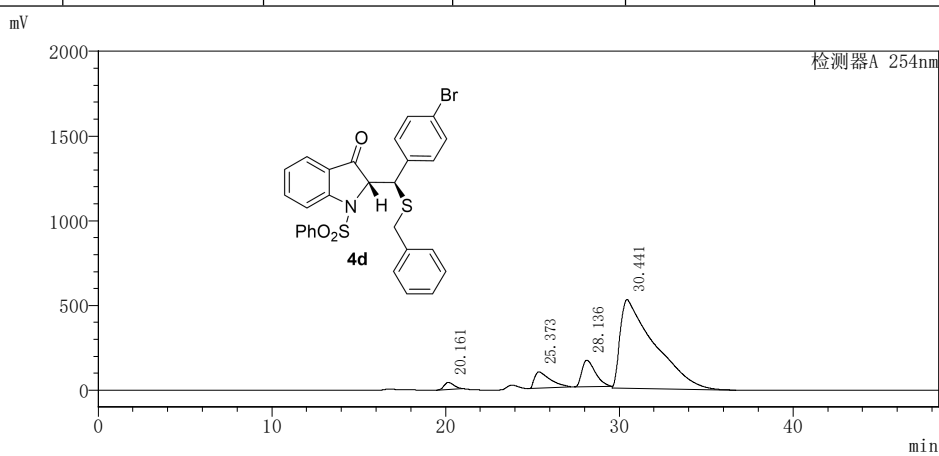

| Peak | Processed Channel | Retention Time (min) | Peak Area (mAU*s) | Peak Height (mAU) | Peak Area (%) |
|------|-------------------|----------------------|-------------------|-------------------|---------------|
| 1    | PDA 254 nm        | 20.161               | 1605826           | 41159             | 1.820         |
| 2    | PDA 254 nm        | 25.373               | 5981619           | 96595             | 6.781         |
| 3    | PDA 254 nm        | 28.136               | 8492311           | 156946            | 9.627         |
| 4    | PDA 254 nm        | 30.441               | 72132304          | 525039            | 81.772        |

The **enantiomeric excess** was determined by HPLC with an IA-H column (*n*-hexane/*i*-PrOH = 90/10, flow rate 1.0 mL/min,  $\lambda = 254$  nm),  $t_R = 8.936$  min (major),  $t_R = 10.447$  min (minor), 63% ee.

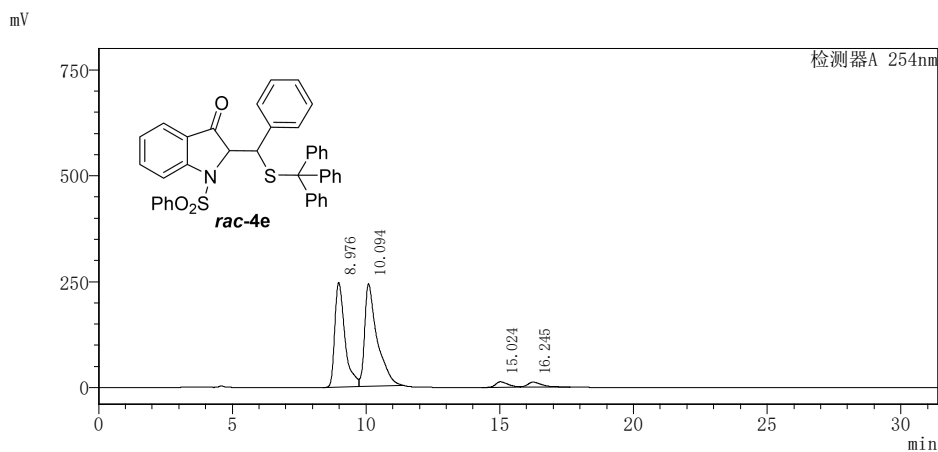

| Peak | Processed Channel | Retention Time (min) | Peak Area (mAU*s) | Peak Hight (mAU) | Peak Area (%) |
|------|-------------------|----------------------|-------------------|------------------|---------------|
| 1    | PDA 254 nm        | 8.976                | 6372919           | 245096           | 47.303        |
| 2    | PDA 254 nm        | 10.094               | 6292528           | 223431           | 46.705        |
| 3    | PDA 254 nm        | 15.024               | 411651            | 13014            | 3.055         |
| 4    | PDA 254 nm        | 16.245               | 11453             | 11453            | 2.937         |

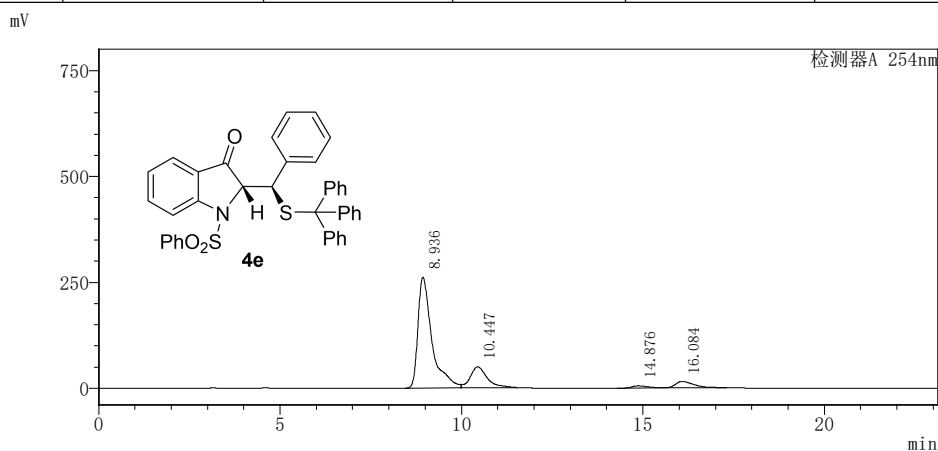

| Peak | Processed Channel | Retention Time (min) | Peak Area (mAU*s) | Peak Hight (mAU) | Peak Area (%) |
|------|-------------------|----------------------|-------------------|------------------|---------------|
| 1    | PDA 254 nm        | 8.936                | 7013247           | 261446           | 75.437        |
| 2    | PDA 254 nm        | 10.447               | 1593459           | 49431            | 17.140        |
| 3    | PDA 254 nm        | 14.876               | 160806            | 5389             | 1.730         |
| 4    | PDA 254 nm        | 16.084               | 529359            | 15185            | 5.693         |

The **enantiomeric excess** was determined by HPLC with an IA-H column (*n*-hexane/*i*-PrOH = 90/10, flow rate 1.0 mL/min,  $\lambda = 254$  nm),  $t_R = 8.729$  min (major),  $t_R = 10.331$  min (minor), 86% ee (By using mixed solvent with hexane and dichloromethane to control the recrystallization process, 96% ee was obtained in the liquid phase).

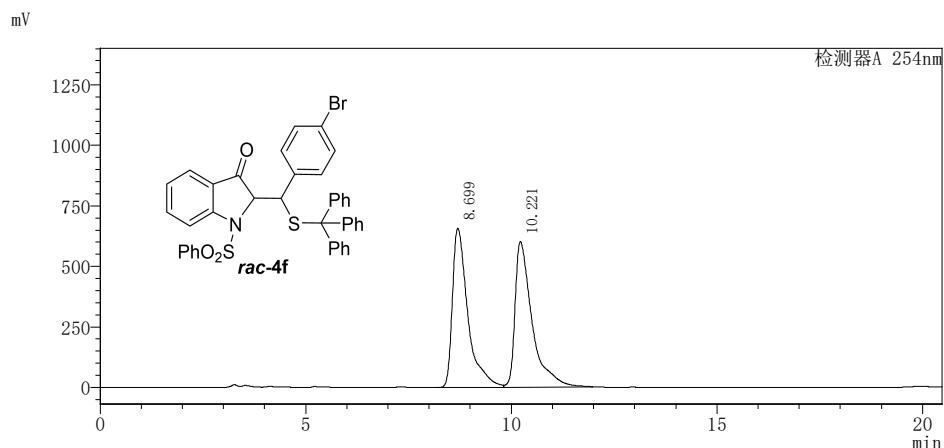

| Peak | Processed Channel | Retention Time (min) | Peak Area (mAU*s) | Peak Hight (mAU) | Peak Area (%) |
|------|-------------------|----------------------|-------------------|------------------|---------------|
| 1    | PDA 254 nm        | 8.699                | 17251757          | 658412           | 49.922        |
| 2    | PDA 254 nm        | 10.221               | 17305559          | 601911           | 50.078        |

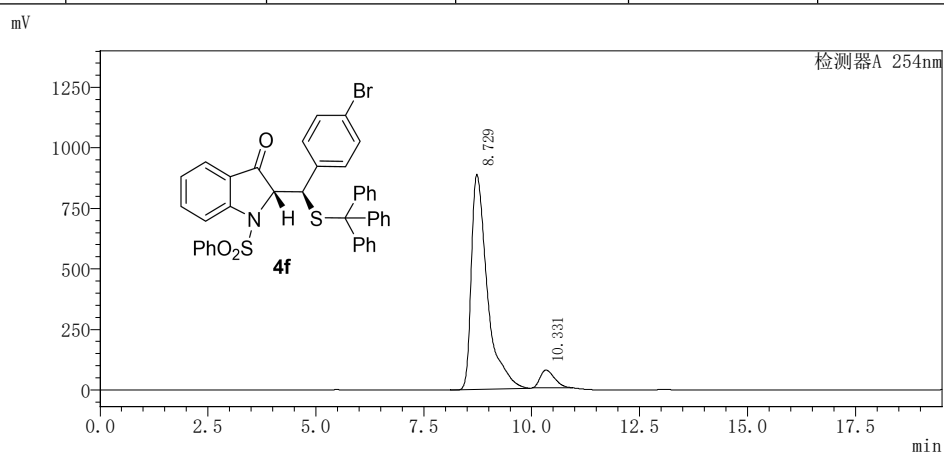

| Peak | Processed Channel | Retention Time (min) | Peak Area (mAU*s) | Peak Hight (mAU) | Peak Area (%) |
|------|-------------------|----------------------|-------------------|------------------|---------------|
| 1    | PDA 254 nm        | 8.729                | 22921159          | 888754           | 93.100        |
| 2    | PDA 254 nm        | 10.331               | 1698867           | 73715            | 6.900         |

**Liquid phase of 4f:** the **enantiomeric excess** was determined by HPLC with an IA-H column (*n*-hexane/*i*-PrOH = 90/10, flow rate 1.0 mL/min,  $\lambda = 254$  nm),  $t_R = 8.575$  min (major),  $t_R = 10.165$  min (minor), 96% ee.

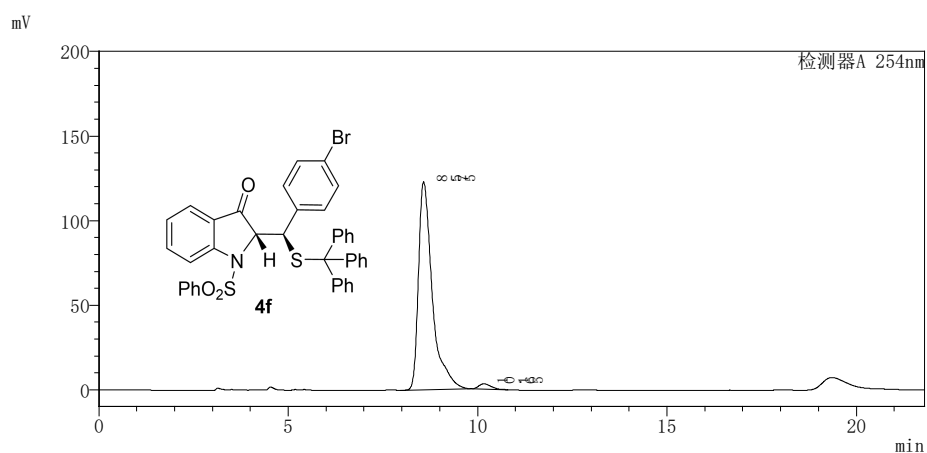

| Peak | Processed Channel | Retention Time (min) | Peak Area (mAU*s) | Peak Hight (mAU) | Peak Area (%) |
|------|-------------------|----------------------|-------------------|------------------|---------------|
| 1    | PDA 254 nm        | 8.575                | 3122249           | 122914           | 97.797        |
| 2    | PDA 254 nm        | 10.165               | 70324             | 3155             | 2.203         |

**Solid phase of 4f:** the **enantiomeric excess** was determined by HPLC with an IA-H column (*n*-hexane/*i*-PrOH = 90/10, flow rate 1.0 mL/min,  $\lambda = 254$  nm),  $t_R = 8.474$  min (major),  $t_R = 10.051$  min (minor), 50% ee.

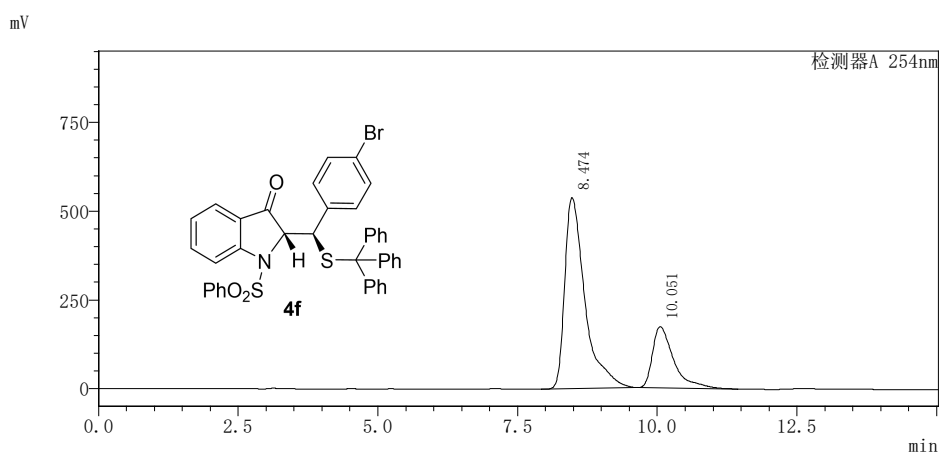

| Peak | Processed Channel | Retention Time (min) | Peak Area (mAU*s) | Peak Hight (mAU) | Peak Area (%) |
|------|-------------------|----------------------|-------------------|------------------|---------------|
| 1    | PDA 254 nm        | 8.474                | 13530298          | 538026           | 74.845        |
| 2    | PDA 254 nm        | 10.051               | 4547341           | 172629           | 25.155        |

The **enantiomeric excess** was determined by HPLC with an IA-H column (*n*-hexane/*i*-PrOH = 80/20, flow rate 1.0 mL/min,  $\lambda = 254$  nm),  $t_R = 8.040$  min (major),  $t_R = 11.746$  min (minor), 96% ee.

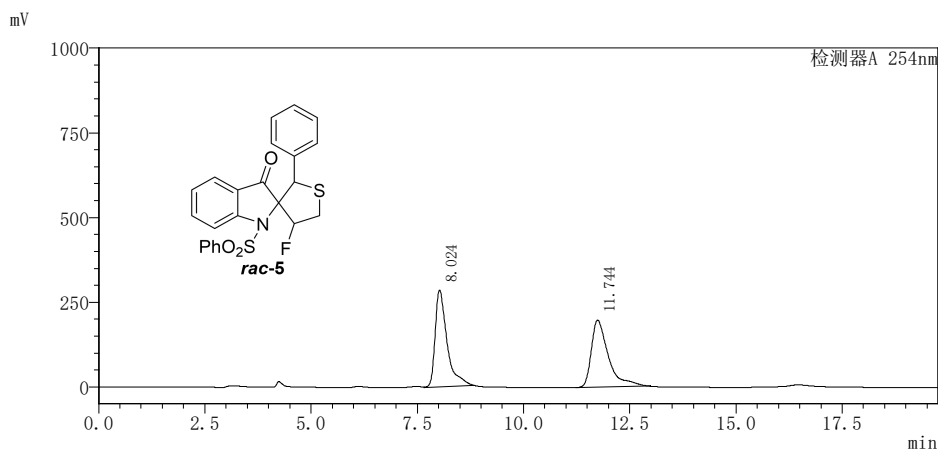

| Peak | Processed Channel | Retention Time (min) | Peak Area (mAU*s) | Peak Hight (mAU) | Peak Area (%) |
|------|-------------------|----------------------|-------------------|------------------|---------------|
| 1    | PDA 254 nm        | 8.024                | 5558851           | 285661           | 50.038        |
| 2    | PDA 254 nm        | 11.744               | 5550519           | 197881           | 49.962        |

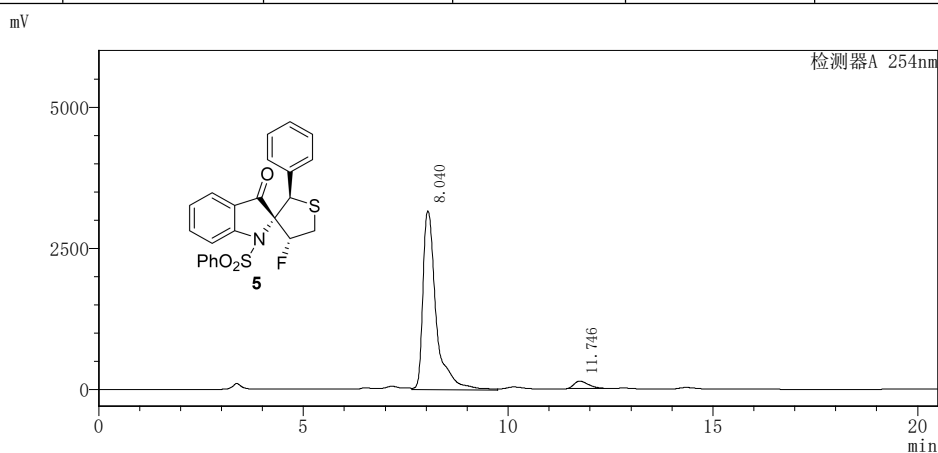

| Peak | Processed Channel | Retention Time (min) | Peak Area (mAU*s) | Peak Hight (mAU) | Peak Area (%) |
|------|-------------------|----------------------|-------------------|------------------|---------------|
| 1    | PDA 254 nm        | 8.040                | 71458785          | 3163185          | 97.825        |
| 2    | PDA 254 nm        | 11.746               | 1588730           | 93554            | 2.175         |



The **enantiomeric excess** was determined by HPLC with an IC-H column (*n*-hexane/*i*-PrOH = 80/20, flow rate 1.0 mL/min,  $\lambda = 254$  nm),  $t_R = 28.757$  min (major),  $t_R = 61.545$  min (minor), 96% ee.

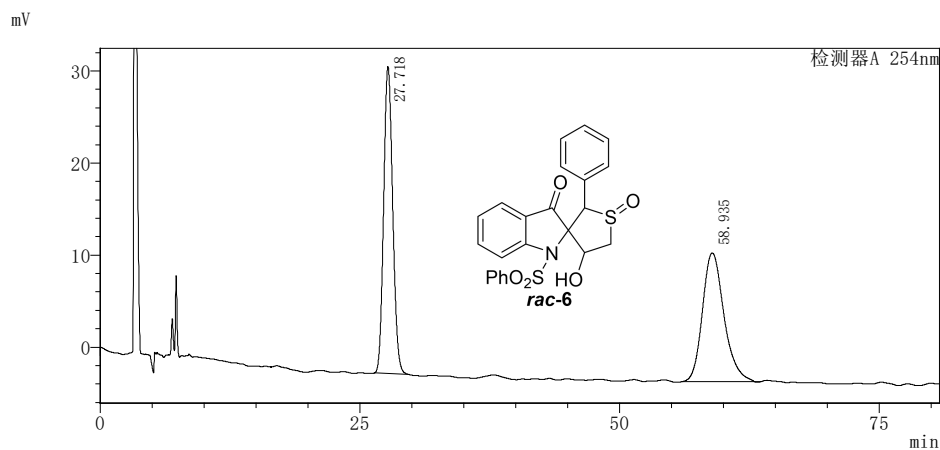

| Peak | Processed Channel | Retention Time (min) | Peak Area (mAU*s) | Peak Hight (mAU) | Peak Area (%) |
|------|-------------------|----------------------|-------------------|------------------|---------------|
| 1    | PDA 254 nm        | 27.718               | 2021608           | 33382            | 50.037        |
| 2    | PDA 254 nm        | 58.935               | 2018610           | 13996            | 49.963        |

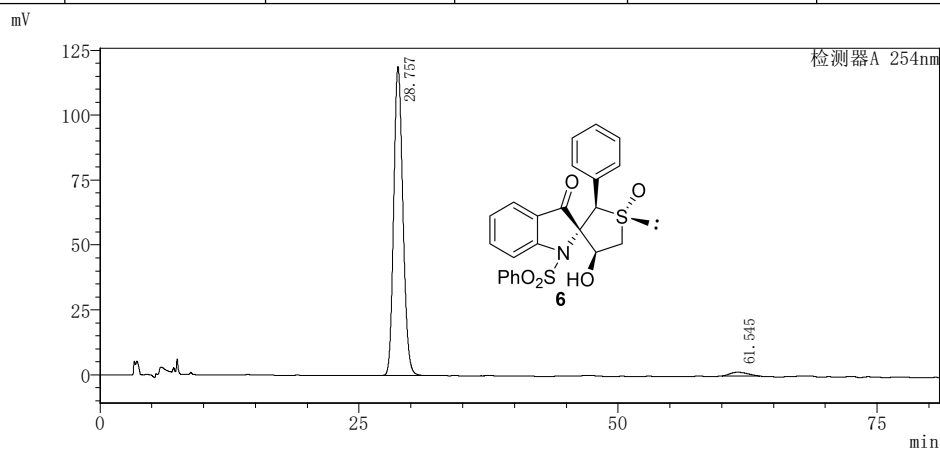

| Peak | Processed Channel | Retention Time (min) | Peak Area (mAU*s) | Peak Hight (mAU) | Peak Area (%) |
|------|-------------------|----------------------|-------------------|------------------|---------------|
| 1    | PDA 254 nm        | 28.757               | 7337315           | 119135           | 97.865        |
| 2    | PDA 254 nm        | 61.545               | 160043            | 1374             | 2.135         |

The **enantiomeric excess** was determined by HPLC with an IA-H column (*n*-hexane/*i*-PrOH = 80/20, flow rate 1.0 mL/min,  $\lambda = 254$  nm),  $t_R = 32.003$  min (major),  $t_R = 47.945$  min (minor), 99% ee.

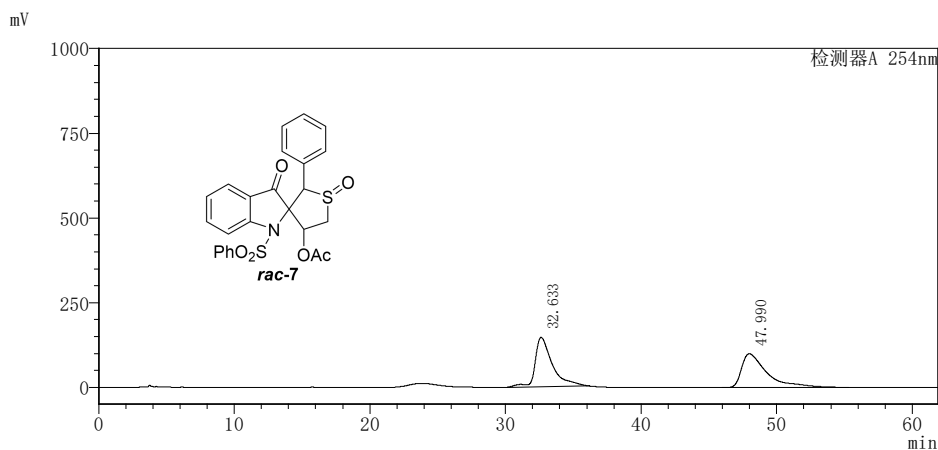

| Peak | Processed Channel | Retention Time (min) | Peak Area (mAU*s) | Peak Hight (mAU) | Peak Area (%) |
|------|-------------------|----------------------|-------------------|------------------|---------------|
| 1    | PDA 254 nm        | 32.633               | 12899622          | 145741           | 49.708        |
| 2    | PDA 254 nm        | 47.990               | 13051046          | 99748            | 50.292        |

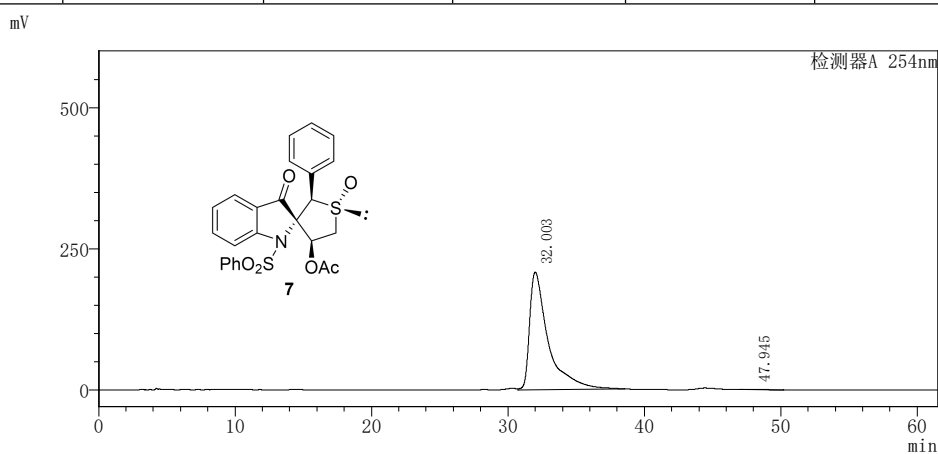

| Peak | Processed Channel | Retention Time (min) | Peak Area (mAU*s) | Peak Hight (mAU) | Peak Area (%) |
|------|-------------------|----------------------|-------------------|------------------|---------------|
| 1    | PDA 254 nm        | 32.003               | 19907537          | 208503           | 99.792        |
| 2    | PDA 254 nm        | 47.945               | 41486             | 456              | 0.208         |

The **enantiomeric excess** was determined by HPLC with an IA-H column (*n*-hexane/*i*-PrOH = 80/20, flow rate 1.0 mL/min,  $\lambda$  = 254 nm),  $t_R$  = 45.516 min (major),  $t_R$  = 85.345 min (minor), 99% ee.

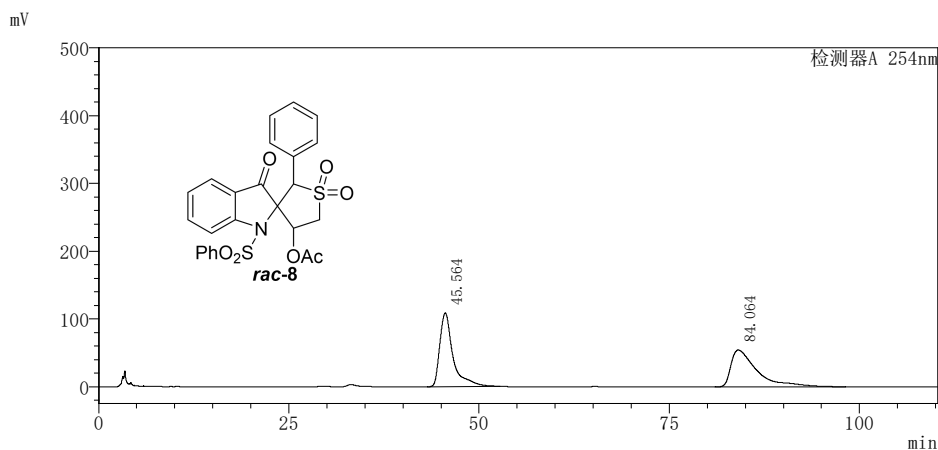

| Peak | Processed Channel | Retention Time (min) | Peak Area (mAU*s) | Peak Hight (mAU) | Peak Area (%) |
|------|-------------------|----------------------|-------------------|------------------|---------------|
| 1    | PDA 254 nm        | 45.554               | 13183627          | 108871           | 50.123        |
| 2    | PDA 254 nm        | 84.064               | 13118914          | 54610            | 49.877        |

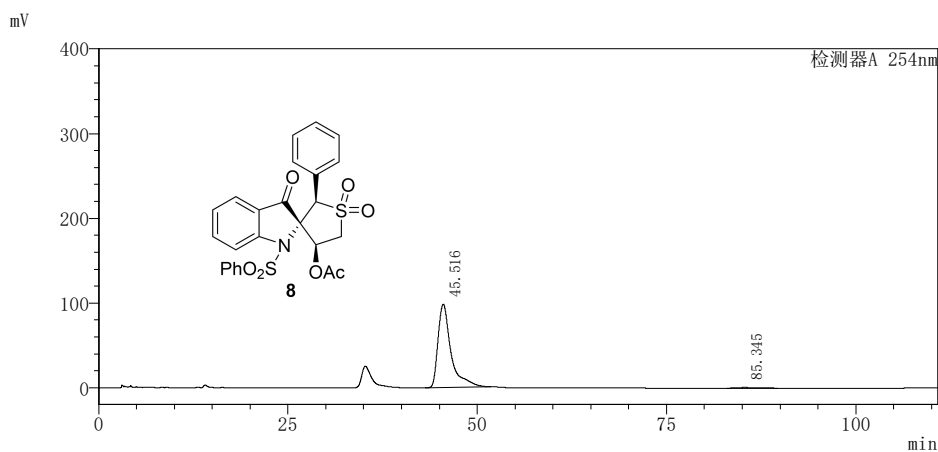

| Peak | Processed Channel | Retention Time (min) | Peak Area (mAU*s) | Peak Hight (mAU) | Peak Area (%) |
|------|-------------------|----------------------|-------------------|------------------|---------------|
| 1    | PDA 254 nm        | 45.516               | 11788032          | 98671            | 99.510        |
| 2    | PDA 254 nm        | 85.345               | 58050             | 479              | 0.490         |

The **enantiomeric excess** was determined by HPLC with an IA-H column (*n*-hexane/*i*-PrOH = 90/10, flow rate 1 mL/min,  $\lambda = 254$  nm),  $t_R = 15.735$  min (major),  $t_R = 22.279$  min (minor), 99% ee.

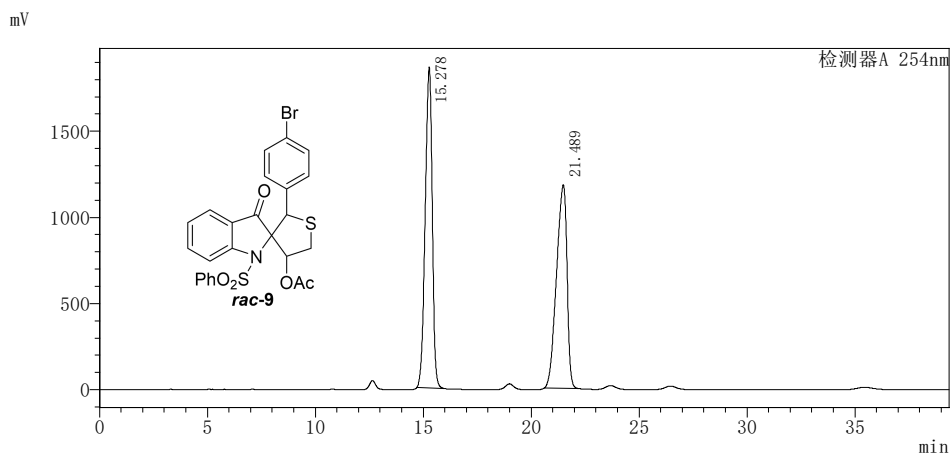

| Peak | Processed Channel | Retention Time (min) | Peak Area (mAU*s) | Peak Hight (mAU) | Peak Area (%) |
|------|-------------------|----------------------|-------------------|------------------|---------------|
| 1    | PDA 254 nm        | 15.278               | 42179636          | 1864109          | 51.263        |
| 2    | PDA 254 nm        | 21.489               | 40101909          | 1181982          | 48.737        |

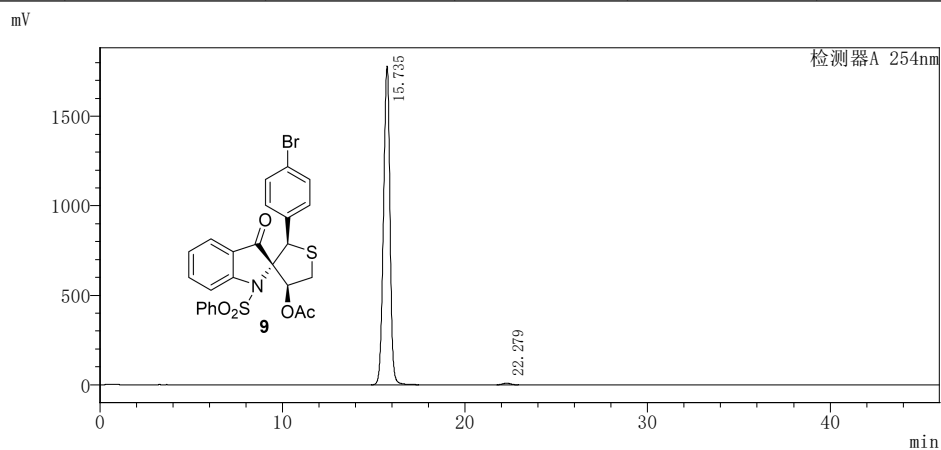

| Peak | Processed Channel | Retention Time (min) | Peak Area (mAU*s) | Peak Hight (mAU) | Peak Area (%) |
|------|-------------------|----------------------|-------------------|------------------|---------------|
| 1    | PDA 254 nm        | 15.735               | 43898320          | 1782473          | 99.365        |
| 2    | PDA 254 nm        | 22.279               | 280661            | 9396             | 0.635         |

#### 14. DFT calculations

All molecules were computed using density functional theory (DFT) at the WB97XD/6-31G\* level of theory using the Gaussian 09 software package. The DFT method was chosen for its ability to accurately predict molecular properties and reaction pathways. The WB97XD functional was selected for its high accuracy in describing dispersion interactions, which can play a significant role in the behavior of molecules. The 6-31G\* basis set was chosen for its balance between computational cost and accuracy in describing molecular electronic structure. This level of theory has been widely used in previous studies and has been shown to provide reliable results for a variety of molecular systems.

Based on the possible activation model of the cinchona-derived squaramide catalyzed asymmetric Michael addition reaction,<sup>14</sup> we performed DFT calculations using template substrates **1a** and **2a**. In computational studies, **1a** is the electrophile (E) in the reaction process, and the mercaptoglydehyde released by **2a** is the nucleophile (Nu). According to the relative position and reaction mode of substrate **1a**, we calculated the possible intermediates **Int3-Int10** and **In3'**, and the results showed that mode **A** catalytic mode had the lowest energy (**Figure S3**). In order to further investigate the effects of the configuration of substrate **1a** on the asymmetric sulfa-Michael/aldol cascade reaction, we replace **1a** (*Z*) in intermediate **Int3** with **1a'** (*E*) to optimize the intermediate **In3'**. Through the analysis visualization of optimized important intermediates **Int3**, **Int5**, and **Int3'**, it is not difficult to know that in the case of the intermediate **Int3**, the substrate induced mercaptoacetaldehyde to approach from the *Si* face (right side) of the (*Z*)-2-ylideneoxindole **1a** under the action of catalyst **B** hydrogen bonding. However, for the intermediate **Int5**, the binding situation is reversed, and mercaptoacetaldehyde is approached from the *Re* face (left side) of the (*Z*)-2-ylideneoxindole **1a**. It is worth noting that in the intermediate **Int3**, in addition to the hydrogen bonding of the squaramide catalyst **B**, there are also obvious  $\pi$ - $\pi$  stacking interactions between the two pairs in the three benzene rings (2-ylideneoxindole **1a** (*Z*) phenyl ring of benzenesulfonyl group and its C2 double bond,

and benzene ring of catalyst **B** with trifluoromethyl substitution). The benzene ring  $\pi$ - $\pi$  stacking interactions make the intermediate **Int3** more stable than the intermediate **Int5**. Therefore, nucleophilic addition from the right side in mode **A** is beneficial to Michael addition reaction. Although the energy of the intermediate **Int3'** is only slightly less than that of the intermediate **Int3** ( $\Delta\Delta G = 0.3$  kcal/mol), the (*E*)-2-ylideneoxindole **1a'** needs to overcome some steric hindrance in order to form the intermediate **Int3'** by hydrogen bonding of the catalyst **B** due to the benzene ring facing up. It may be due to the above reasons that the intermediate **Int3** is the best intermediate to enter the subsequent reaction (**Figure S4**).

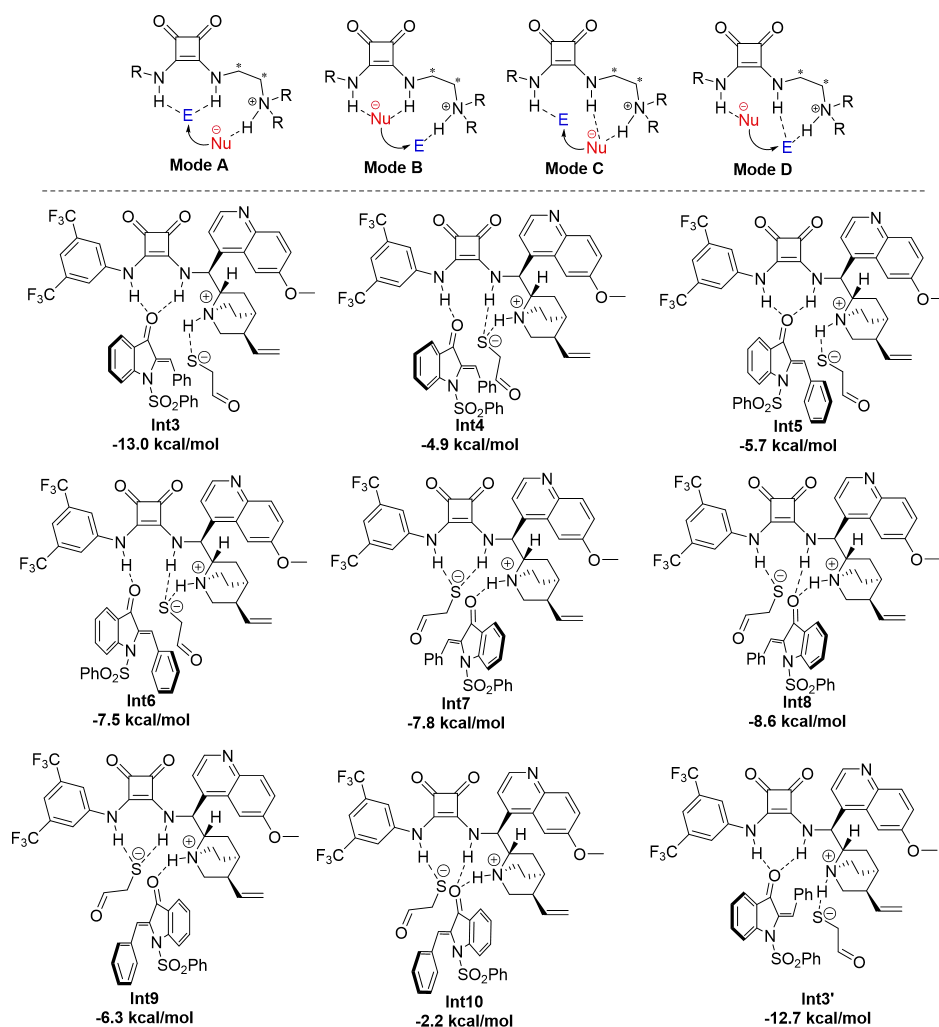

**Figure S3.** DFT-optimized structures and relative free energies ( $\Delta G$ , kcal/mol) of **Int3-Int10** and **Int3'** along four possible binding modes at the WB97XD/6-31G\* level.

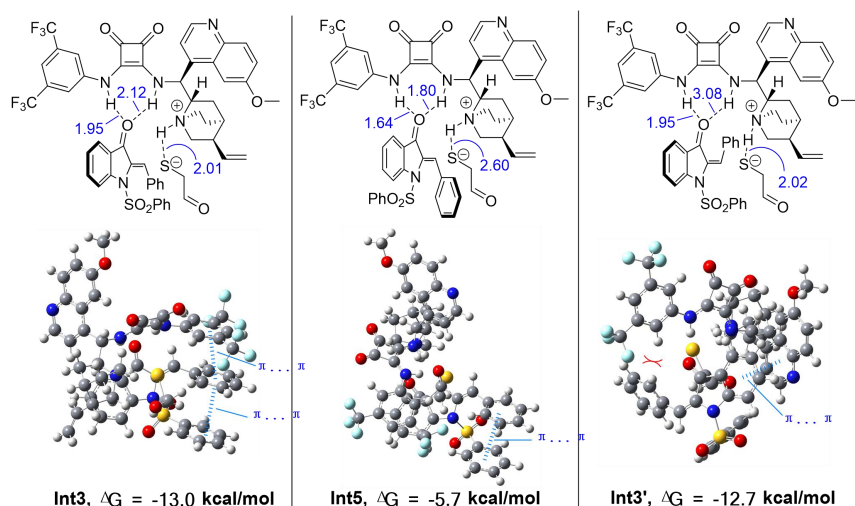

**Figure S4.** Analysis visualization of optimized key intermediates based on model **A**. All energies are in kcal/mol, and bond lengths are in angstroms (Å).

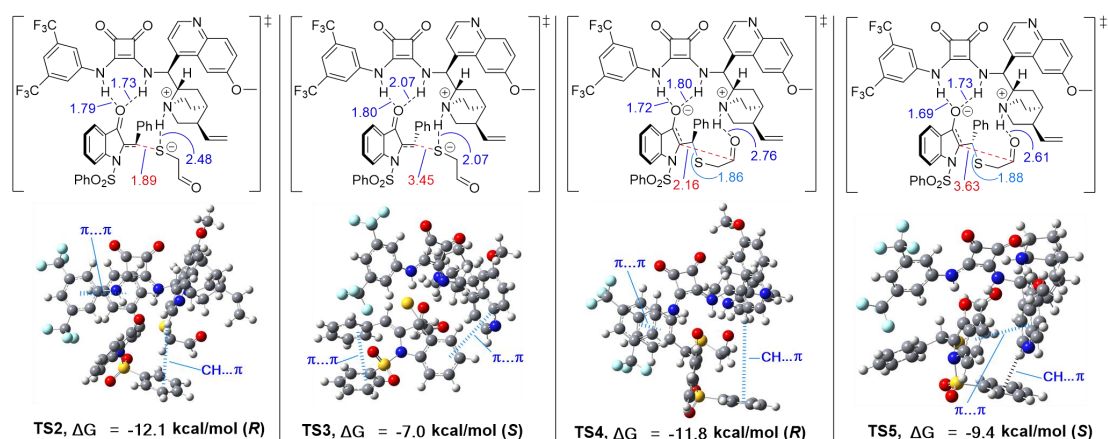

**Figure S5.** DFT-optimized structure of key transition states **TS2** and **TS3** for C–S bond formation, **TS4** and **TS5** for C–C bond formation in squaramide-catalyzed sulfa-Michael/aldol cascade reaction at the WB97XD/6-31G\* level. The relative Gibbs energies are given in kcal/mol and intermolecular distances are in Å.

If the binding mode of catalyst **B** to substrate **1a** does not change during the subsequent reaction, it means that the stereoscopic configuration of the C2 carbon of indolin-3-one has been determined at this time (the subsequent aldol condensation reaction ring formation is cycloaddition to the right of indolin-3-one). We continue to explore the subsequent reaction based on the intermediate **Int3**, and then Michael addition forms the C-S bond. At the same time, with the generation of the chiral center, *R* configuration is generated through the transition state **TS2**, and *S*

configuration is generated through the transition state **TS3**. Through the analysis visualization of optimized transition state **TS2** and transition state **TS3**, we conclude that **TS2** has a lower energy. This may be due to the fact that in addition to the hydrogen bonding of catalyst **B**, the  $\pi$ - $\pi$  stacking interaction of the benzene ring of the transition state **TS2** is stronger. Besides, the quinine ring of the catalyst and the benzene ring of the benzenesonyl group of the substrate are close to vertical, resulting in CH- $\pi$  interaction.<sup>15</sup> These non-covalent interaction forces make the transition state **TS2** more stable. In addition, the distance between C-S in the transition state **TS2** ( $d_{c-s} = 1.89 \text{ \AA}$ ) is shorter than that between C-S in the transition state **TS3** ( $d_{c-s} = 3.45 \text{ \AA}$ ), indicating that C-S bonds are more easily formed in the transition state **TS2** in the subsequent transformation. In the subsequent transition states and intermediates, the subsequent transformation based on **TS2** basically continues the non-covalent interaction. Especially in the subsequent aldol condensation process, the transition state **TS4** has a similar interaction force to **TS2**. The C-C distance of transition state **TS4** ( $d_{c-c} = 2.16 \text{ \AA}$ ) to bond is also shorter than that of transition state **TS5** ( $d_{c-c} = 3.63 \text{ \AA}$ ) (**Figure S5**).

According to the results of DFT calculations, the asymmetric reaction catalyzed by the cinchona-derived squaramide-catalyzed asymmetric sulfa-Michael/aldol cascade reaction is most likely to be the chiral sulfa-Michael addition through the transition **TS2**, and then the aldol condensation through the transition **TS4**, and finally the asymmetric construction of spiro[indoline-2,3'-thiophen]-3-one. The configuration of the final product selected by the theoretical calculation is consistent with the actual target compound.

Based on all the calculated intermediates and transition states, Gibbs free energy profiles for the overall catalytic pathways are shown in the **Figure S6**. A possible asymmetric catalytic cycle is shown in the **Figure S7**.



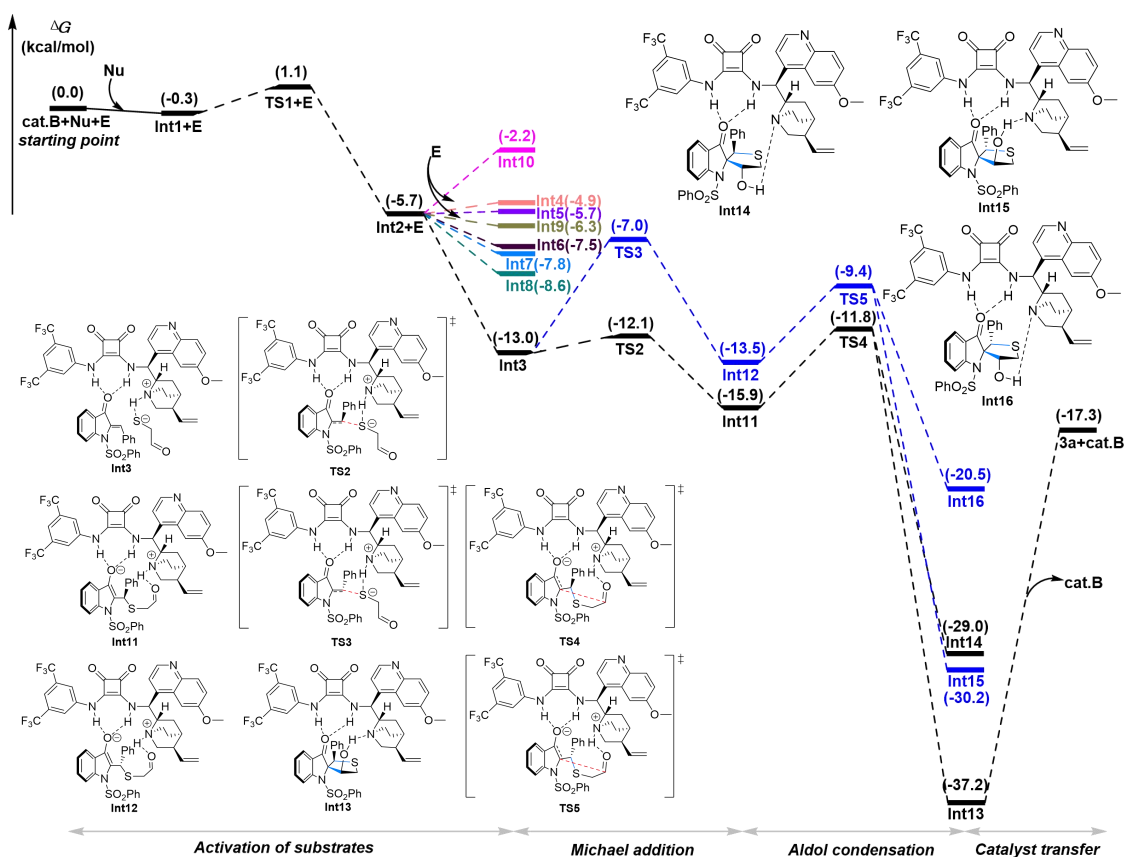

**Figure S6.** Gibbs free energy profiles for the overall catalytic pathways. The relative Gibbs energies are given in kcal/mol.

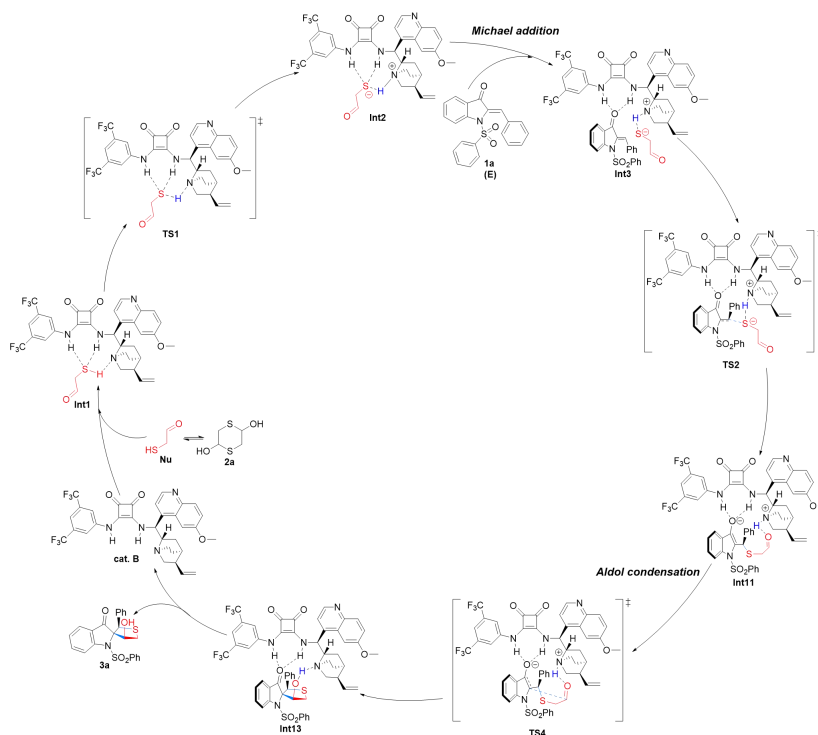

**Figure S7.** A proposed full catalytic cycle.

## Cartesian coordinates of the optimized structures

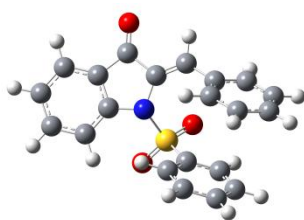

**1a(E)**

-933194.57 kcal/mol

|   |             |             |             |
|---|-------------|-------------|-------------|
| C | 3.27368300  | 0.69506100  | -0.29417200 |
| C | 2.42461500  | -0.40371100 | -0.16113600 |
| C | 2.91468700  | -1.69800400 | -0.29462800 |
| C | 4.27583400  | -1.84727400 | -0.54586300 |
| C | 5.13357400  | -0.74905400 | -0.67296200 |
| C | 4.63114700  | 0.53880000  | -0.54944400 |
| H | 2.27447700  | -2.56301900 | -0.18004100 |
| H | 4.67880700  | -2.85047500 | -0.64749500 |
| H | 6.18766000  | -0.90890500 | -0.87462500 |
| H | 5.26181600  | 1.41617000  | -0.65212200 |
| C | 2.47600700  | 1.92470200  | -0.16728000 |
| N | 1.07068500  | 0.01837400  | 0.04051300  |
| C | 1.05788400  | 1.44891800  | -0.03956600 |
| S | 0.14406100  | -0.74967700 | 1.27643500  |
| C | -1.24849300 | -1.39556800 | 0.38247600  |
| C | -2.50762200 | -1.26659300 | 0.95335900  |
| C | -3.59546700 | -1.84683900 | 0.30843200  |
| C | -3.41431500 | -2.53506700 | -0.88652800 |
| C | -2.14295100 | -2.65042300 | -1.44827300 |
| C | -1.04725100 | -2.08507400 | -0.80974500 |
| H | -2.63150500 | -0.70002000 | 1.86918300  |
| H | -4.58752000 | -1.74641500 | 0.73635500  |
| H | -4.26751900 | -2.98097600 | -1.38858600 |
| H | -2.00568500 | -3.18344900 | -2.38370100 |
| C | 0.02169500  | 2.28709800  | -0.11611300 |
| H | 0.30627900  | 3.33879600  | -0.11145500 |
| C | -1.40931300 | 1.96623600  | -0.26760000 |
| C | -1.83982700 | 1.22937400  | -1.37564800 |
| C | -2.35642800 | 2.45223000  | 0.63773800  |
| C | -3.19383700 | 0.98882000  | -1.57876300 |
| C | -3.70878200 | 2.19455700  | 0.44312600  |
| H | -2.02557500 | 3.01806000  | 1.50328900  |
| C | -4.13071300 | 1.46905600  | -0.66879100 |
| H | -3.51478000 | 0.41570200  | -2.44302600 |
| H | -4.43609100 | 2.56869000  | 1.15754000  |

|   |             |             |             |
|---|-------------|-------------|-------------|
| H | -5.18844500 | 1.27786500  | -0.82434000 |
| O | 2.84148500  | 3.08052500  | -0.22418200 |
| H | -1.10535400 | 0.85298200  | -2.08132400 |
| O | -0.32731300 | 0.26176100  | 2.20162700  |
| H | -0.05373200 | -2.15963200 | -1.24088400 |
| O | 0.93865500  | -1.87136300 | 1.74292300  |

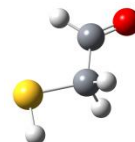

**Nu**

-346322.89 kcal/mol

|   |             |             |             |
|---|-------------|-------------|-------------|
| C | 1.18637200  | -0.35938900 | 0.00025600  |
| O | 2.33986400  | -0.01471800 | -0.00022500 |
| H | 0.90528600  | -1.43394700 | 0.00071500  |
| C | 0.04457000  | 0.64457500  | 0.00019000  |
| H | 0.15124200  | 1.27820100  | 0.88582600  |
| H | 0.15152600  | 1.27844400  | -0.88523300 |
| S | -1.56188600 | -0.22479300 | -0.00014300 |
| H | -2.32244300 | 0.88061300  | 0.00010400  |

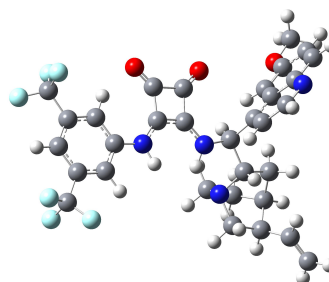

**cat. B**

-1429937.65 kcal/mol

|   |             |            |             |
|---|-------------|------------|-------------|
| C | -4.33911500 | 1.80747700 | -0.34674800 |
| C | -4.53344500 | 3.02039300 | -1.26960200 |
| C | -2.33110100 | 2.39508000 | -2.26742600 |
| H | -4.67688100 | 0.90523100 | -0.86776000 |
| H | -5.59921700 | 3.19425600 | -1.44386400 |
| H | -2.09023000 | 1.35595000 | -2.51121900 |
| H | -1.64553000 | 3.01872400 | -2.84937700 |
| H | -4.94583700 | 1.88406300 | 0.55989500  |
| N | -2.03314300 | 2.61888400 | -0.84412600 |
| C | -2.36897600 | 4.00423800 | -0.49854100 |
| H | -1.78449900 | 4.66448500 | -1.14723100 |
| H | -2.04090700 | 4.19007300 | 0.53024800  |
| C | -3.89949700 | 4.28962200 | -0.64981500 |
| H | -4.04543200 | 5.11251900 | -1.36047600 |







C -3.58566700 0.26837800 0.13954100  
 C -4.23233300 1.37573900 -0.40743900  
 C -5.62407600 1.41490800 -0.40943400  
 C -6.38218800 0.38104000 0.12154000  
 H -3.83251100 -1.65522300 1.08111900  
 H -3.66391400 2.18847300 -0.85092800  
 H -7.46388500 0.42953500 0.11815800  
 C -6.30004900 2.64456600 -0.96041900  
 C -6.52727400 -1.88627900 1.16992200  
 F -5.74979000 3.03246600 -2.11973800  
 F -6.19618300 3.67877000 -0.10797600  
 F -7.60968100 2.44183900 -1.18125600  
 F -7.67634900 -1.48175100 1.73597800  
 F -6.85497600 -2.73019700 0.17611500  
 F -5.85331800 -2.59837600 2.08718100  
 N -2.19277800 0.14854800 0.20986700  
 C -1.24279200 0.92847000 -0.34643100  
 C 0.14432900 0.82393000 -0.24830400  
 C 0.36764300 1.85272100 -1.27205800  
 C -1.14208500 2.08865700 -1.28209300  
 O -1.90054600 2.85880400 -1.81883300  
 O 1.33534600 2.22849800 -1.90647200  
 H -1.84944200 -0.74399500 0.58388200  
 N 0.97323600 0.03211800 0.45093000  
 H 0.54935600 -0.73416300 0.96779000  
 C 5.39906000 4.08337400 1.48223300  
 C 5.42160400 3.21245400 2.53965400  
 C 4.69418800 1.99987600 2.51036300  
 C 3.92889600 1.68162900 1.34829400  
 C 3.90606100 2.59921600 0.27260200  
 C 4.62599300 3.77441100 0.33521500  
 H 5.96705500 5.00486000 1.53608800  
 H 5.99743200 3.42772000 3.43350100  
 C 3.32059100 -0.35359300 2.48007500  
 C 4.09398700 0.07615100 3.58320200  
 H 2.82241900 -1.31798700 2.54364000  
 H 4.15700500 -0.55317100 4.46888400  
 N 4.76722900 1.19811000 3.60942800  
 O 4.53936200 4.58268800 -0.74723600  
 C 5.19027100 5.83391600 -0.71550400  
 H 4.94976200 6.31699700 -1.66287100  
 H 6.27922400 5.72289200 -0.63485400  
 H 4.82546700 6.45841100 0.10956900  
 H 3.29592700 2.44318300 -0.61108100

C 3.00574500 -1.03248000 -3.06267300  
 H 3.22808300 0.03222500 -2.93918300  
 H 2.97193100 -1.23409100 -4.13703700  
 C 4.69109700 -4.34962600 -2.04136800  
 C 5.20769100 -5.25262100 -2.86870900  
 H 5.04894900 -4.29936900 -1.01267800  
 H 5.98787100 -5.93597100 -2.54841700  
 H 4.86918600 -5.34397300 -3.89851000  
 C 3.23286300 0.43198500 1.35744800  
 C 2.39972900 -0.02750800 0.16663000  
 H 2.56633200 0.64527000 -0.67467000  
 C 2.85575800 -1.44101600 -0.24057200  
 H 2.86129400 -2.08742600 0.63788500  
 C 1.12771700 -4.11092000 1.94227000  
 O 2.30820200 -3.81928300 1.84191400  
 H 0.79196900 -5.14561900 1.73899000  
 C 0.03941700 -3.13277400 2.23071000  
 H -0.72229800 -3.56828000 2.88300200  
 H 0.45326700 -2.23558900 2.70309100  
 S -0.70570600 -2.81070600 0.57241800  
 H 0.96559500 -2.26963400 -0.62371300

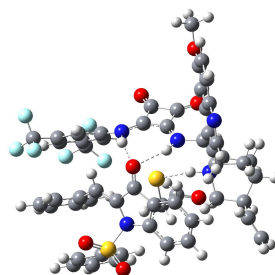

**Int3**

-2709468.13 kcal/mol

C -5.08371300 -2.12889300 1.01442800  
 C -4.82016500 -3.03885200 2.22152200  
 C -3.20611000 -1.27683500 2.97483900  
 H -5.79125600 -1.34134100 1.29988700  
 H -5.72476600 -3.60078000 2.46946200  
 H -3.46530700 -0.21927100 2.91217400  
 H -2.34631700 -1.37533900 3.63897800  
 H -5.54967100 -2.67923800 0.19380200  
 N -2.73752700 -1.72195000 1.62538600  
 C -2.39442100 -3.17964700 1.67041400  
 H -1.67302100 -3.29721200 2.48184300  
 H -1.89668300 -3.41468000 0.72564500  
 C -3.67129200 -4.02406900 1.90597500  
 H -3.51269000 -4.64532900 2.79453900

|   |             |             |             |   |             |             |             |
|---|-------------|-------------|-------------|---|-------------|-------------|-------------|
| C | 3.49311800  | 3.68446000  | -0.71621000 | H | -6.00398100 | 6.45775700  | -0.75127800 |
| C | 2.15799500  | 3.39180500  | -0.96975700 | H | -4.79440800 | 2.46421100  | 0.63120700  |
| C | 1.36928500  | 2.82805700  | 0.02967500  | C | -4.39315400 | -2.16060400 | 3.40647600  |
| C | 1.91186600  | 2.59363800  | 1.29258000  | H | -5.22853600 | -1.53126100 | 3.72736400  |
| C | 3.23574500  | 2.93129700  | 1.53837100  | H | -4.11127000 | -2.78903300 | 4.25710000  |
| C | 4.04085800  | 3.47001700  | 0.54162000  | C | -3.97471000 | -4.93421000 | 0.74834900  |
| H | 1.73138200  | 3.57314800  | -1.95177900 | C | -4.09804700 | -6.25493200 | 0.83824700  |
| H | 1.32238000  | 2.09487500  | 2.05186200  | H | -4.08993200 | -4.45755300 | -0.22509300 |
| H | 5.08543000  | 3.67991400  | 0.73020200  | H | -4.32525800 | -6.86715400 | -0.02947100 |
| C | 3.80332500  | 2.65783800  | 2.90576700  | H | -3.97783000 | -6.77495900 | 1.78601700  |
| C | 4.32925400  | 4.25617400  | -1.82723500 | C | -4.87582400 | 0.18541500  | -0.99426900 |
| F | 3.38777500  | 1.46853700  | 3.38176000  | C | -3.91221300 | -0.01431000 | 0.16966800  |
| F | 3.43029000  | 3.58799600  | 3.79571500  | H | -4.31006500 | 0.50702300  | 1.04429300  |
| F | 5.14855200  | 2.63222700  | 2.89729600  | C | -3.75376000 | -1.49652900 | 0.54663700  |
| F | 5.64393400  | 4.14483500  | -1.58396800 | H | -3.33994900 | -2.03612600 | -0.30885800 |
| F | 4.08215500  | 3.62991400  | -2.99563000 | C | -0.52894100 | -2.01475100 | -2.12227800 |
| F | 4.06964700  | 5.55929900  | -2.02722400 | C | 0.44404600  | -2.92754000 | -1.71319400 |
| N | 0.06033700  | 2.42089900  | -0.29531600 | C | 0.09695300  | -4.25681200 | -1.47627900 |
| C | -0.93107200 | 2.31243200  | 0.60999600  | C | -1.21615100 | -4.63741700 | -1.73452800 |
| C | -2.10195100 | 1.56716100  | 0.64360700  | C | -2.17506600 | -3.73412200 | -2.21508600 |
| C | -2.51405800 | 2.14394300  | 1.93167300  | C | -1.83479700 | -2.40253800 | -2.39767700 |
| C | -1.22671700 | 2.96707700  | 1.91087400  | H | 0.82527800  | -4.98197300 | -1.13992800 |
| O | -0.67157600 | 3.76292700  | 2.62617700  | H | -1.50297500 | -5.66986000 | -1.56044200 |
| O | -3.48306500 | 1.99841500  | 2.65597000  | H | -3.17788300 | -4.08282300 | -2.44331200 |
| H | -0.04095800 | 1.87297000  | -1.15012700 | H | -2.54783600 | -1.66709600 | -2.75933900 |
| N | -2.63989900 | 0.61780800  | -0.14323200 | C | 0.07708400  | -0.69053300 | -2.16361500 |
| H | -2.17041000 | 0.38899200  | -1.01574100 | N | 1.70332100  | -2.28428000 | -1.55795000 |
| C | -6.76329900 | 3.92452800  | -1.70973000 | C | 1.50981300  | -0.89441500 | -1.84123400 |
| C | -6.91769300 | 2.88015000  | -2.58369900 | S | 3.10816700  | -3.07503100 | -2.19322100 |
| C | -6.30032600 | 1.62955400  | -2.35129600 | C | 4.19029100  | -3.15032700 | -0.79165600 |
| C | -5.49980200 | 1.46192700  | -1.18377000 | C | 5.52371800  | -2.80648400 | -0.96910100 |
| C | -5.36360200 | 2.54363700  | -0.28771400 | C | 6.39268000  | -2.93926900 | 0.10917200  |
| C | -5.97844600 | 3.75251000  | -0.54240500 | C | 5.92249700  | -3.40088400 | 1.33429800  |
| H | -7.24807800 | 4.87143000  | -1.91697200 | C | 4.57926800  | -3.74097700 | 1.49304100  |
| H | -7.51901300 | 2.98198400  | -3.48083800 | C | 3.70408900  | -3.62695500 | 0.42144700  |
| C | -5.11663100 | -0.78591300 | -1.93292800 | H | 5.86147900  | -2.41269300 | -1.92085200 |
| C | -5.94226700 | -0.51203200 | -3.05056500 | H | 7.43496200  | -2.66150600 | -0.00668700 |
| H | -4.68974300 | -1.77978600 | -1.84854800 | H | 6.60346800  | -3.49132100 | 2.17493800  |
| H | -6.12165200 | -1.29427300 | -3.78624500 | H | 4.21344900  | -4.09574300 | 2.45131700  |
| N | -6.51140700 | 0.64360000  | -3.26981300 | C | 2.37328400  | 0.12507700  | -1.77766200 |
| O | -5.78185300 | 4.72283200  | 0.37813700  | H | 1.98942500  | 1.05708900  | -2.18712100 |
| C | -6.36920100 | 5.98921000  | 0.17119600  | C | 3.69350900  | 0.18536600  | -1.13672400 |
| H | -6.06860900 | 6.59715600  | 1.02463000  | C | 3.78524700  | -0.13122200 | 0.22260900  |
| H | -7.46433700 | 5.92679200  | 0.14078700  | C | 4.81428300  | 0.67708900  | -1.81126800 |

|   |             |             |             |
|---|-------------|-------------|-------------|
| C | 4.98787500  | 0.04205900  | 0.89732400  |
| C | 6.01860600  | 0.83310400  | -1.13555800 |
| H | 4.73733800  | 0.93959300  | -2.86118200 |
| C | 6.10473000  | 0.52164800  | 0.22026000  |
| H | 5.04472600  | -0.18039300 | 1.95729200  |
| H | 6.88458400  | 1.22061900  | -1.66310300 |
| H | 7.04072600  | 0.66550200  | 0.75201900  |
| O | -0.49766500 | 0.38563200  | -2.32408700 |
| H | 2.88979100  | -0.45574100 | 0.74535600  |
| O | 3.70030400  | -2.22213200 | -3.20380600 |
| H | 2.65475700  | -3.88000700 | 0.53215700  |
| O | 2.68761500  | -4.42617800 | -2.51694000 |
| C | 0.51088100  | -1.99675800 | 3.61389200  |
| O | -0.37057600 | -2.66339600 | 4.13045300  |
| H | 0.98393800  | -1.16549300 | 4.17195000  |
| C | 0.97025000  | -2.14332400 | 2.19978400  |
| H | 2.05909000  | -2.03927000 | 2.13353600  |
| H | 0.67178600  | -3.11676100 | 1.79517700  |
| S | 0.16264000  | -0.73649600 | 1.34186500  |
| H | -1.78759700 | -1.23731100 | 1.42295000  |

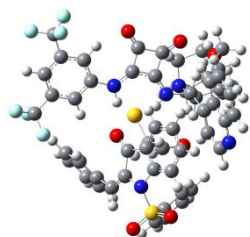

**Int3'**

-2709467.81 kcal/mol

|   |             |             |            |
|---|-------------|-------------|------------|
| C | 3.97591000  | -2.77995000 | 2.09589300 |
| C | 3.72633900  | -3.65581600 | 3.33259800 |
| C | 1.24581600  | -3.35599800 | 3.20635100 |
| H | 4.14189500  | -3.41648400 | 1.22057900 |
| H | 4.54105900  | -4.37421800 | 3.45428300 |
| H | 0.51129300  | -3.51699100 | 2.42212500 |
| H | 0.71904500  | -3.35440900 | 4.16328000 |
| H | 4.87717600  | -2.17288400 | 2.21669500 |
| N | 1.83355700  | -1.99570500 | 3.04915900 |
| C | 2.60671700  | -1.64672000 | 4.28269900 |
| H | 1.87974600  | -1.49434600 | 5.08305700 |
| H | 3.09518700  | -0.68961300 | 4.08697700 |
| C | 3.62234700  | -2.76895700 | 4.59718500 |
| H | 3.23133300  | -3.39569400 | 5.40806100 |
| C | -5.66804400 | 0.60160300  | 0.20139300 |
| C | -4.30336000 | 0.35575300  | 0.27036900 |

|   |             |             |             |
|---|-------------|-------------|-------------|
| C | -3.82835600 | -0.95442300 | 0.14843600  |
| C | -4.73026400 | -2.00464200 | -0.02600300 |
| C | -6.09221700 | -1.73040400 | -0.08384300 |
| C | -6.57809900 | -0.43481300 | 0.02305900  |
| H | -3.59871100 | 1.16793100  | 0.42010700  |
| H | -4.38136100 | -3.02989200 | -0.11276400 |
| H | -7.64062700 | -0.23580600 | -0.03012200 |
| C | -7.04034700 | -2.87721100 | -0.32459800 |
| C | -6.17251200 | 2.00763500  | 0.37712000  |
| F | -6.72808600 | -3.94246900 | 0.42742200  |
| F | -7.00675800 | -3.27539400 | -1.60781900 |
| F | -8.31198400 | -2.54367800 | -0.04582700 |
| F | -6.23565700 | 2.35004100  | 1.68039800  |
| F | -5.36955800 | 2.90753000  | -0.22000900 |
| F | -7.40220900 | 2.17207700  | -0.12926200 |
| N | -2.43955700 | -1.14070700 | 0.20600900  |
| C | -1.74245000 | -2.29129000 | 0.17442500  |
| C | -0.36207800 | -2.49957700 | 0.26792400  |
| C | -0.50235300 | -3.95740200 | 0.19447600  |
| C | -1.99944400 | -3.75784100 | 0.02562000  |
| O | -2.95394400 | -4.48273100 | -0.12547200 |
| O | 0.26522100  | -4.89898000 | 0.29236400  |
| H | -1.89393100 | -0.27820600 | 0.27399100  |
| N | 0.69079300  | -1.67955200 | 0.42636800  |
| H | 0.48878200  | -0.75993300 | 0.83004800  |
| C | 3.09408600  | -3.74609900 | -4.37270300 |
| C | 3.80889700  | -2.59608500 | -4.15809500 |
| C | 3.76014900  | -1.91918100 | -2.91822300 |
| C | 2.95995800  | -2.45457300 | -1.86629200 |
| C | 2.24809700  | -3.65171500 | -2.09868900 |
| C | 2.30462700  | -4.28310300 | -3.32544600 |
| H | 3.14602200  | -4.23783600 | -5.33716900 |
| H | 4.42797900  | -2.16481200 | -4.93791700 |
| C | 3.60995300  | -0.53708100 | -0.57592600 |
| C | 4.38750100  | -0.11398400 | -1.68086100 |
| H | 3.59835900  | 0.09032200  | 0.31008800  |
| H | 4.97187200  | 0.80210400  | -1.60446100 |
| N | 4.47581600  | -0.76528800 | -2.81036600 |
| O | 1.57476300  | -5.41520000 | -3.44363400 |
| C | 1.56337200  | -6.09322500 | -4.68121100 |
| H | 0.90421000  | -6.95024700 | -4.54250800 |
| H | 2.56414400  | -6.44894000 | -4.95694500 |
| H | 1.16647500  | -5.46020900 | -5.48494900 |
| H | 1.63468000  | -4.11902500 | -1.33686600 |





|   |             |             |             |   |             |             |             |
|---|-------------|-------------|-------------|---|-------------|-------------|-------------|
| C | 1.86553100  | -2.56361400 | -0.04412900 | C | -4.62859600 | 1.71469600  | -2.02657900 |
| C | 2.30960000  | -2.89536300 | -1.32068600 | H | -4.73133300 | 0.64966600  | -2.25423600 |
| C | 3.67236500  | -3.07679500 | -1.54098500 | H | -4.76684000 | 2.25850700  | -2.96558700 |
| C | 4.59687400  | -2.96310600 | -0.51597500 | C | -6.44400200 | 4.30139100  | 0.17934500  |
| H | 2.44337900  | -2.27144500 | 2.01636700  | C | -7.11253800 | 5.36920600  | -0.24495400 |
| H | 1.60756100  | -2.99399400 | -2.14392200 | H | -6.68449900 | 3.87699800  | 1.15476900  |
| H | 5.65642400  | -3.07749800 | -0.70823600 | H | -7.89875500 | 5.82231700  | 0.35095700  |
| C | 4.12225900  | -3.30268300 | -2.95976500 | H | 6.89682400  | 5.83268400  | -1.20513700 |
| C | 5.13707300  | -2.53259800 | 1.87624900  | C | -4.17292100 | -1.15314100 | 1.54463900  |
| F | 3.95821200  | -2.18580900 | -3.69662400 | C | -3.57318300 | -0.23122300 | 0.49112900  |
| F | 3.41179600  | -4.27092500 | -3.55694200 | H | -3.90801900 | -0.53963600 | -0.49736100 |
| F | 5.41721200  | -3.64224400 | -3.03569400 | C | -4.11723200 | 1.19387900  | 0.71842600  |
| F | 5.91548600  | -3.62210700 | 1.98614500  | H | -4.01456300 | 1.46461100  | 1.77220900  |
| F | 5.95677300  | -1.49153100 | 1.64531100  | C | 2.57779300  | 0.42489300  | 3.13899600  |
| F | 4.55588300  | -2.33061900 | 3.06887600  | C | 3.70185700  | 0.85693800  | 2.42397200  |
| N | 0.53266800  | -2.23161600 | 0.23931300  | C | 4.90882900  | 1.06446800  | 3.09092400  |
| C | -0.45242700 | -1.95696000 | -0.64591100 | C | 4.93287900  | 0.82588600  | 4.46095100  |
| C | -1.61046600 | -1.19833000 | -0.49079600 | C | 3.81169100  | 0.38958400  | 5.17706400  |
| C | -2.09846500 | -1.53816100 | -1.83845000 | C | 2.61859200  | 0.17870300  | 4.50882200  |
| C | -0.81968100 | -2.34759500 | -2.03777400 | H | 5.79872300  | 1.37913900  | 2.56897200  |
| O | -0.32400900 | -2.98184700 | -2.93634100 | H | 5.86922800  | 0.98037100  | 4.98883600  |
| O | -3.09594200 | -1.27813800 | -2.48085400 | H | 3.88442000  | 0.21504900  | 6.24512200  |
| H | 0.39739000  | -1.79544100 | 1.15037300  | H | 1.72132000  | -0.16120800 | 5.01549600  |
| N | -2.11862300 | -0.36924700 | 0.44826800  | C | 1.48285100  | 0.23960700  | 2.20839000  |
| H | -1.58023600 | -0.20119000 | 1.29719300  | N | 3.36370500  | 1.00518900  | 1.05093600  |
| C | -6.73511800 | -4.43270000 | 0.70813900  | C | 1.97940000  | 0.72357500  | 0.88007000  |
| C | -6.38473700 | -4.12079400 | 1.99540500  | S | 4.45977200  | 1.36082500  | -0.19378000 |
| C | -5.52466100 | -3.03468200 | 2.28286300  | C | 3.73172900  | 2.79959900  | -0.93355800 |
| C | -5.02276500 | -2.24949600 | 1.20233900  | C | 3.75631500  | 2.91068300  | -2.31958700 |
| C | -5.38644400 | -2.59349800 | -0.12062700 | C | 3.20868300  | 4.04484500  | -2.90649600 |
| C | -6.22472700 | -3.66078100 | -0.36593900 | C | 2.64229900  | 5.03858600  | -2.11277500 |
| H | -7.39474600 | -5.27227400 | 0.52227700  | C | 2.63638600  | 4.91645800  | -0.72554700 |
| H | -6.75482300 | -4.70019500 | 2.83457600  | C | 3.19472300  | 3.79530000  | -0.12394400 |
| C | -3.87165700 | -0.94964500 | 2.86830700  | H | 4.15995300  | 2.10544600  | -2.92235700 |
| C | -4.41519700 | -1.80348800 | 3.85489000  | H | 3.20079400  | 4.13689800  | -3.98722800 |
| H | -3.21072100 | -0.14266000 | 3.17840700  | H | 2.19194700  | 5.91017300  | -2.57692100 |
| H | -4.17172100 | -1.63564800 | 4.90209700  | H | 2.18489800  | 5.68834900  | -0.11115700 |
| N | -5.21906700 | -2.80278400 | 3.58978900  | C | 1.08070100  | 0.87103200  | -0.10563900 |
| O | -6.51143200 | -3.90510000 | -1.66599400 | H | 0.07641100  | 0.72745900  | 0.28757100  |
| C | -7.30723500 | -5.02513300 | -1.98829700 | C | 1.09600100  | 1.16384800  | -1.54866200 |
| H | -7.37129400 | -5.03947700 | -3.07655200 | C | 0.30561900  | 2.21461900  | -2.02967000 |
| H | -8.31786400 | -4.93801200 | -1.56952400 | C | 1.73923200  | 0.31758300  | -2.45586200 |
| H | -6.84798900 | -5.95953000 | -1.64253200 | C | 0.19259100  | 2.42920300  | -3.39825300 |
| H | -4.99755300 | -2.06462900 | -0.98443200 | C | 1.60238000  | 0.52306800  | -3.82434300 |

|   |             |             |             |
|---|-------------|-------------|-------------|
| H | 2.35282100  | -0.49590500 | -2.09253700 |
| C | 0.83291800  | 1.58101300  | -4.29953800 |
| H | -0.40223100 | 3.26366500  | -3.75890500 |
| H | 2.09727600  | -0.15478000 | -4.51229600 |
| H | 0.72593800  | 1.73964400  | -5.36863800 |
| O | 0.40275500  | -0.31077000 | 2.40948600  |
| H | -0.19489500 | 2.88899400  | -1.33848000 |
| O | 4.44035100  | 0.27534000  | -1.15348500 |
| H | 3.18838300  | 3.68384800  | 0.95596600  |
| O | 5.70126800  | 1.72856500  | 0.45847000  |
| C | -0.87094500 | 4.82664600  | 0.78273300  |
| O | -1.13116400 | 4.79927900  | -0.41210800 |
| H | -1.35484000 | 5.57942500  | 1.43688000  |
| C | -0.02016500 | 3.83275300  | 1.49057000  |
| H | 0.65331600  | 3.32810100  | 0.79574500  |
| H | 0.55263600  | 4.29689200  | 2.29964700  |
| S | -1.28056200 | 2.70000800  | 2.20072900  |
| H | -2.41111200 | 2.34771700  | 0.52877100  |

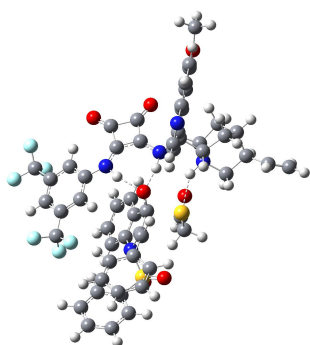

**Int5**

-2709460.80 kcal/mol

|   |             |             |             |
|---|-------------|-------------|-------------|
| C | 5.31673300  | -2.19738400 | -0.67359800 |
| C | 5.83000400  | -2.11827500 | -2.11907800 |
| C | 4.15811600  | -0.36287800 | -2.74681800 |
| H | 5.97984600  | -1.62794300 | -0.01689700 |
| H | 6.88110900  | -2.41462300 | -2.15902800 |
| H | 3.89898600  | 0.60339900  | -2.31537100 |
| H | 3.79192900  | -0.38551800 | -3.77425500 |
| H | 5.32916200  | -3.22793800 | -0.30907400 |
| N | 3.39639900  | -1.42776900 | -2.01736100 |
| C | 3.50551200  | -2.72724800 | -2.75415200 |
| H | 2.91791400  | -2.62404900 | -3.66584100 |
| H | 3.02612400  | -3.48050500 | -2.12327900 |
| C | 4.99152700  | -3.04576700 | -3.02930300 |
| H | 5.22354900  | -2.79029600 | -4.07028000 |
| C | -3.37481900 | 3.12969800  | 0.59561700  |

|   |             |             |             |
|---|-------------|-------------|-------------|
| C | -2.18989200 | 2.45784400  | 0.84022900  |
| C | -0.96634600 | 3.07822300  | 0.55500400  |
| C | -0.94995000 | 4.38419300  | 0.06808700  |
| C | -2.15697300 | 5.04077500  | -0.15951300 |
| C | -3.37534200 | 4.42751500  | 0.08844900  |
| H | -2.19922500 | 1.44374800  | 1.22645300  |
| H | -0.00760600 | 4.88882000  | -0.12944200 |
| H | -4.30673200 | 4.94791900  | -0.09944600 |
| C | -2.11568700 | 6.42301800  | -0.75675800 |
| C | -4.69699900 | 2.46243800  | 0.84440100  |
| F | -1.84772300 | 6.37276500  | -2.07475800 |
| F | -1.16713800 | 7.18199200  | -0.19114500 |
| F | -3.28716100 | 7.06724900  | -0.61738900 |
| F | -5.50170000 | 3.21672800  | 1.61002500  |
| F | -5.36710000 | 2.24188600  | -0.30848000 |
| F | -4.56776400 | 1.27100400  | 1.45033000  |
| N | 0.18744500  | 2.31319800  | 0.73290600  |
| C | 1.42346200  | 2.57367500  | 0.25330200  |
| C | 2.44595000  | 1.67036900  | -0.02184300 |
| C | 3.37744900  | 2.71452900  | -0.45206200 |
| C | 2.26930900  | 3.73723500  | -0.14977600 |
| O | 2.12998400  | 4.93247600  | -0.24984200 |
| O | 4.50921900  | 2.70654000  | -0.89792200 |
| H | 0.02880700  | 1.30580400  | 0.91967600  |
| N | 2.51140600  | 0.32573300  | -0.03653100 |
| H | 1.63871700  | -0.15293200 | 0.29048500  |
| C | 7.68788000  | 0.30893100  | 3.67396500  |
| C | 6.67289400  | -0.35787500 | 4.30854400  |
| C | 5.45650300  | -0.65319300 | 3.64805400  |
| C | 5.29777300  | -0.25454900 | 2.28839700  |
| C | 6.34968400  | 0.45025400  | 1.65648400  |
| C | 7.52036700  | 0.72660400  | 2.32970600  |
| H | 8.60569600  | 0.52155100  | 4.20971700  |
| H | 6.76962800  | -0.67608100 | 5.34118800  |
| C | 3.09769800  | -1.22605900 | 2.40193300  |
| C | 3.36084700  | -1.55440700 | 3.75185000  |
| H | 2.11910000  | -1.45305000 | 1.98282700  |
| H | 2.59334900  | -2.05538700 | 4.33844900  |
| N | 4.49366600  | -1.30248500 | 4.35972800  |
| O | 8.46353100  | 1.40418900  | 1.63170100  |
| C | 9.64225100  | 1.80379400  | 2.29716900  |
| H | 10.21944200 | 2.36900200  | 1.56488400  |
| H | 10.23206500 | 0.94047600  | 2.63072600  |
| H | 9.42120900  | 2.44862800  | 3.15660700  |



|   |             |             |             |   |             |             |             |
|---|-------------|-------------|-------------|---|-------------|-------------|-------------|
| C | 3.89052400  | -2.33328700 | -0.68665800 | H | 0.88453700  | 5.04002400  | -1.27458700 |
| C | 4.19131200  | -0.99413400 | -0.42315400 | C | 0.49242900  | 5.17010400  | 2.84523100  |
| C | 5.52139700  | -0.60824900 | -0.24131800 | H | 0.78857800  | 5.59904000  | 1.88271100  |
| C | 6.51935200  | -1.57410700 | -0.30242200 | H | 0.96004800  | 5.77646500  | 3.62628500  |
| C | 6.22789000  | -2.91575700 | -0.52652600 | C | -2.81444100 | 4.53872800  | 4.72354900  |
| H | 2.86254300  | -2.62956700 | -0.86909500 | C | -3.18856000 | 5.06615300  | 5.88496300  |
| H | 5.77642800  | 0.43313400  | -0.06773500 | H | -3.57743600 | 4.18715600  | 4.02779700  |
| H | 7.01669600  | -3.65702600 | -0.55247100 | H | -4.23552300 | 5.16368700  | 6.15464800  |
| C | 7.95787100  | -1.14295200 | -0.17030900 | H | -2.46086600 | 5.42241600  | 6.61073000  |
| C | 4.52394700  | -4.72914600 | -0.89059700 | C | -1.17413100 | 3.15484600  | -0.91380000 |
| F | 8.09235000  | -0.09219900 | 0.65064200  | C | -0.20037100 | 3.06173500  | 0.25694800  |
| F | 8.47087000  | -0.78731600 | -1.36039800 | H | 0.44634800  | 3.93867100  | 0.24895300  |
| F | 8.73012900  | -2.13348000 | 0.31054000  | C | -1.00445600 | 3.10424900  | 1.57333300  |
| F | 5.55356000  | -5.47226800 | -1.32348200 | H | -1.75199000 | 2.30740600  | 1.56393700  |
| F | 4.11166000  | -5.26154500 | 0.27539800  | C | 0.02089100  | -3.03189600 | 0.55918300  |
| F | 3.51650600  | -4.87957800 | -1.76527300 | C | -1.13555400 | -3.81695100 | 0.63924500  |
| N | 3.10826300  | -0.11707000 | -0.33144900 | C | -1.20886200 | -4.87972400 | 1.53324600  |
| C | 3.09655500  | 1.22029800  | -0.20423400 | C | -0.09075900 | -5.13068500 | 2.32173100  |
| C | 2.01203900  | 2.08488800  | -0.02887200 | C | 1.06849400  | -4.34722400 | 2.25179800  |
| C | 2.87501600  | 3.27174900  | 0.00101700  | C | 1.12688200  | -3.27992900 | 1.37124400  |
| C | 4.06862800  | 2.34901100  | -0.20126900 | H | -2.09073900 | -5.50171800 | 1.60330100  |
| O | 5.26762300  | 2.48127800  | -0.27883400 | H | -0.12722200 | -5.95971400 | 3.02224000  |
| O | 2.68405900  | 4.46470000  | 0.17047400  | H | 1.91208300  | -4.56779600 | 2.89630600  |
| H | 2.18582100  | -0.56235800 | -0.35986500 | H | 1.98852300  | -2.62356500 | 1.33740100  |
| N | 0.68994300  | 1.92059800  | 0.13279300  | C | -0.21945200 | -1.97248800 | -0.40718700 |
| H | 0.31227600  | 0.97683800  | 0.16189400  | N | -2.14167400 | -3.30889800 | -0.22561700 |
| C | -0.81321600 | 6.00060300  | -4.04710200 | C | -1.63551300 | -2.12981300 | -0.83552700 |
| C | -1.86175100 | 5.11925200  | -4.01147500 | S | -3.22087300 | -4.34190400 | -1.05442400 |
| C | -1.98638900 | 4.16420000  | -2.97583900 | C | -4.79677400 | -3.88429900 | -0.37711300 |
| C | -0.99807700 | 4.12926400  | -1.94718500 | C | -4.91385500 | -3.60168100 | 0.98023300  |
| C | 0.07969600  | 5.04299900  | -2.00282600 | C | -6.17308600 | -3.31185700 | 1.49088300  |
| C | 0.17297400  | 5.95900600  | -3.03030700 | C | -7.28735400 | -3.31649100 | 0.65344600  |
| H | -0.74503700 | 6.71880100  | -4.85596800 | C | -7.14821500 | -3.59769900 | -0.70265600 |
| H | -2.62825300 | 5.12557100  | -4.77916500 | C | -5.89367300 | -3.88279600 | -1.23045600 |
| C | -2.24943400 | 2.30582500  | -1.00344300 | H | -4.03370500 | -3.55349400 | 1.61327500  |
| C | -3.17031700 | 2.43204100  | -2.07168600 | H | -6.28188200 | -3.07470500 | 2.54434300  |
| H | -2.42457200 | 1.52418100  | -0.26800200 | H | -8.26846600 | -3.08944600 | 1.05977400  |
| H | -4.03088600 | 1.76861100  | -2.11738300 | H | -8.01450200 | -3.58296900 | -1.35597500 |
| N | -3.06057800 | 3.32700800  | -3.02068700 | C | -2.24536400 | -1.18490400 | -1.55762800 |
| O | 1.24311800  | 6.78686800  | -2.99283100 | H | -1.56645100 | -0.42910400 | -1.95273700 |
| C | 1.43382900  | 7.70036800  | -4.05078900 | C | -3.68549500 | -0.97526200 | -1.78144600 |
| H | 2.36266000  | 8.22479400  | -3.82525200 | C | -4.21824500 | -0.89560200 | -3.07039500 |
| H | 0.61491000  | 8.42871800  | -4.11044200 | C | -4.50738700 | -0.72960000 | -0.67591600 |
| H | 1.53559400  | 7.18656300  | -5.01491400 | C | -5.56009100 | -0.58170700 | -3.25165500 |

|   |             |             |             |
|---|-------------|-------------|-------------|
| C | -5.84489100 | -0.39566400 | -0.86444600 |
| H | -4.08854500 | -0.80437600 | 0.32476600  |
| C | -6.37334800 | -0.32178300 | -2.14983100 |
| H | -5.96932200 | -0.52716800 | -4.25577700 |
| H | -6.47701800 | -0.20760200 | -0.00207600 |
| H | -7.41816300 | -0.06355000 | -2.29533700 |
| O | 0.51925700  | -1.06816000 | -0.78928000 |
| H | -3.57939500 | -1.08825200 | -3.92638400 |
| O | -2.90387800 | -5.68984900 | -0.62136200 |
| H | -5.75862000 | -4.07320200 | -2.28933400 |
| O | -3.19707200 | -3.99214000 | -2.46069500 |
| C | -2.03223500 | -0.72018100 | 2.80607900  |
| O | -2.69135400 | -1.45848700 | 2.10385300  |
| H | -2.34000500 | 0.34485700  | 2.91974700  |
| C | -0.76927400 | -1.07327600 | 3.52158500  |
| H | -0.84751500 | -0.80290300 | 4.58123500  |
| H | -0.58566900 | -2.14760600 | 3.43215600  |
| S | 0.57053200  | -0.12621700 | 2.69863400  |
| H | 0.13514600  | 1.73939300  | 2.74416200  |

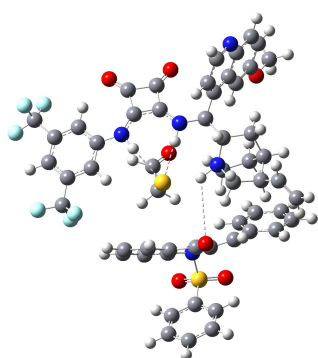

**Int7**

-2709462.95 kcal/mol

|   |             |             |             |
|---|-------------|-------------|-------------|
| C | -1.80803600 | -4.04980000 | -1.53606400 |
| C | -0.48612300 | -4.57327500 | -0.95753200 |
| C | -0.01514400 | -2.41425000 | 0.18161700  |
| H | -2.62925500 | -4.39751400 | -0.90685700 |
| H | -0.53412300 | -5.66005000 | -0.85206300 |
| H | -0.55693100 | -1.74654300 | 0.85352700  |
| H | 1.04576700  | -2.16930600 | 0.26605100  |
| H | -1.99194000 | -4.45274900 | -2.53581600 |
| N | -0.39151600 | -2.06127400 | -1.22582700 |
| C | 0.57793500  | -2.68517700 | -2.17959600 |
| H | 1.52209400  | -2.14189100 | -2.09437900 |
| H | 0.19164400  | -2.50539800 | -3.18670300 |
| C | 0.70485700  | -4.19197800 | -1.86785400 |
| H | 1.62034800  | -4.36193600 | -1.29094400 |

|   |             |             |             |
|---|-------------|-------------|-------------|
| C | -0.75650300 | 5.85007000  | -0.45371200 |
| C | -1.10428800 | 4.55839100  | -0.82124100 |
| C | -2.37575700 | 4.06036000  | -0.50905100 |
| C | -3.28717700 | 4.87038700  | 0.17186500  |
| C | -2.91350000 | 6.16355400  | 0.52339100  |
| C | -1.65539300 | 6.67010900  | 0.22011600  |
| H | -0.39165500 | 3.92334300  | -1.34162400 |
| H | -4.27136600 | 4.49092200  | 0.43609100  |
| H | -1.38143500 | 7.67771900  | 0.50574600  |
| C | -3.93084900 | 7.04363500  | 1.20462800  |
| C | 0.64369100  | 6.32944100  | -0.72036000 |
| F | -4.63813600 | 6.36767200  | 2.11947200  |
| F | -4.80615900 | 7.54955700  | 0.31907300  |
| F | -3.35264600 | 8.08557500  | 1.82790300  |
| F | 0.72277100  | 7.66608800  | -0.77646500 |
| F | 1.49444800  | 5.92685800  | 0.24875100  |
| F | 1.13070100  | 5.84662800  | -1.87866500 |
| N | -2.65160200 | 2.74594500  | -0.89521800 |
| C | -3.60406500 | 1.90711700  | -0.40373800 |
| C | -3.66310900 | 0.52258300  | -0.48222700 |
| C | -4.91311900 | 0.45376700  | 0.31277300  |
| C | -4.87546100 | 1.99046700  | 0.36036100  |
| O | -5.56743900 | 2.86503100  | 0.82478200  |
| O | -5.61354600 | -0.42258900 | 0.75312100  |
| H | -1.84942900 | 2.27104600  | -1.32080800 |
| N | -2.84016500 | -0.36735900 | -1.07937900 |
| H | -1.91624400 | 0.02021900  | -1.30254600 |
| C | -6.34551200 | -5.24924700 | 1.16929100  |
| C | -6.82359400 | -4.82822800 | -0.04387500 |
| C | -6.12782800 | -3.87270400 | -0.82147500 |
| C | -4.90434900 | -3.34045100 | -0.32422100 |
| C | -4.43200200 | -3.78203500 | 0.93177500  |
| C | -5.13110100 | -4.71466900 | 1.66631000  |
| H | -6.90491600 | -5.98110600 | 1.74014500  |
| H | -7.75471000 | -5.21445300 | -0.44468700 |
| C | -4.81197900 | -2.03357600 | -2.33822800 |
| C | -6.03716300 | -2.62190200 | -2.72837100 |
| H | -4.34614700 | -1.28728300 | -2.97456400 |
| H | -6.49172300 | -2.33562800 | -3.67499800 |
| N | -6.67720800 | -3.51329500 | -2.01549600 |
| O | -4.58323400 | -5.07003700 | 2.85491400  |
| C | -5.30823400 | -5.93750600 | 3.69974100  |
| H | -4.71127400 | -6.03700900 | 4.60688800  |
| H | -5.44023700 | -6.92836000 | 3.24660500  |



|   |             |             |             |   |             |             |             |
|---|-------------|-------------|-------------|---|-------------|-------------|-------------|
| C | 1.65758800  | 5.31317400  | -0.18624000 | H | -8.28925500 | -2.43325000 | 3.82138500  |
| C | 0.85364100  | 4.27318100  | -0.63494300 | H | -4.71693400 | -1.75443400 | 1.43894900  |
| C | -0.53674800 | 4.36369000  | -0.51339400 | C | -1.52010200 | -4.18904500 | 0.36510200  |
| C | -1.10863600 | 5.51053700  | 0.04563100  | H | -2.22690700 | -4.44937400 | 1.15811400  |
| C | -0.28056100 | 6.53990600  | 0.47644600  | H | -0.64776500 | -4.83956900 | 0.48495200  |
| C | 1.10458300  | 6.45801000  | 0.37200600  | C | -1.56050600 | -4.37819100 | -3.49197500 |
| H | 1.29941000  | 3.37838700  | -1.06476000 | C | -1.24421400 | -5.37805700 | -4.30830300 |
| H | -2.18689400 | 5.58872000  | 0.15926500  | H | -2.23306800 | -3.59672800 | -3.84803700 |
| H | 1.73464500  | 7.26324800  | 0.72691100  | H | -1.64326400 | -5.43835700 | -5.31600800 |
| C | -0.90899000 | 7.79743400  | 1.02171300  | H | -0.56800000 | -6.17241800 | -4.00034900 |
| C | 3.14806000  | 5.14426600  | -0.28203400 | C | -4.78632100 | -0.84922100 | -1.21338900 |
| F | -2.02725600 | 7.53941300  | 1.71121200  | C | -3.34691100 | -0.76625500 | -0.72652600 |
| F | -1.23762700 | 8.64443900  | 0.03054300  | H | -3.31202100 | -0.85233300 | 0.36460300  |
| F | -0.06990800 | 8.45690400  | 1.84014800  | C | -2.56850400 | -1.93542100 | -1.36307000 |
| F | 3.82001100  | 6.21913900  | 0.14792300  | H | -2.45564400 | -1.68864700 | -2.42443800 |
| F | 3.56879200  | 4.09060400  | 0.45084900  | C | 3.80687600  | -1.04880100 | -1.69944300 |
| F | 3.54145700  | 4.90479600  | -1.54893600 | C | 3.95534600  | -0.42168700 | -0.46428100 |
| N | -1.28484200 | 3.26646300  | -0.95136900 | C | 4.27816400  | 0.92345800  | -0.37177000 |
| C | -2.54647000 | 2.91716800  | -0.58145200 | C | 4.46238400  | 1.61585200  | -1.56694800 |
| C | -3.16272600 | 1.67474500  | -0.65460500 | C | 4.32634100  | 0.99140500  | -2.81133100 |
| C | -4.40863200 | 2.16908100  | -0.01852500 | C | 3.98844500  | -0.35275200 | -2.88749000 |
| C | -3.74967400 | 3.55752500  | 0.01363400  | H | 4.37809400  | 1.41548700  | 0.58726300  |
| O | -4.07056600 | 4.66458600  | 0.37417000  | H | 4.69390900  | 2.67395400  | -1.52573400 |
| O | -5.44932900 | 1.68388500  | 0.34718200  | H | 4.46315600  | 1.57145600  | -3.71808600 |
| H | -0.70485900 | 2.47964000  | -1.26418000 | H | 3.84815800  | -0.85749400 | -3.83780600 |
| N | -2.72376800 | 0.48845400  | -1.13537100 | C | 3.34230000  | -2.42116300 | -1.46984800 |
| H | -1.70426400 | 0.45905800  | -1.25394800 | N | 3.69554500  | -1.33013500 | 0.62371400  |
| C | -8.00306900 | -2.46942600 | 1.03468200  | C | 3.19965700  | -2.53126400 | 0.02078200  |
| C | -8.18543400 | -2.03899800 | -0.25325800 | S | 5.04937700  | -1.52934800 | 1.68838500  |
| C | -7.11993600 | -1.49429500 | -1.00832600 | C | 6.35373400  | -2.03701800 | 0.59373800  |
| C | -5.83159400 | -1.39774100 | -0.40972400 | C | 6.46848600  | -3.38875500 | 0.27576000  |
| C | -5.66600000 | -1.83932000 | 0.92202700  | C | 7.42815900  | -3.77774900 | -0.65197000 |
| C | -6.72303400 | -2.36372300 | 1.63306000  | C | 8.25230200  | -2.82427400 | -1.24536700 |
| H | -8.84147800 | -2.87871000 | 1.58610100  | C | 8.12886400  | -1.47750600 | -0.91212400 |
| H | -9.15656900 | -2.09933500 | -0.73291900 | C | 7.17263700  | -1.07247400 | 0.01212500  |
| C | -5.09112100 | -0.43324800 | -2.48283000 | H | 5.82409200  | -4.11586300 | 0.75742600  |
| C | -6.41081200 | -0.57029400 | -2.97137200 | H | 7.53317800  | -4.82657000 | -0.90953100 |
| H | -4.32832000 | 0.01957200  | -3.10889400 | H | 8.99845500  | -3.13377200 | -1.97065700 |
| H | -6.64598300 | -0.23815600 | -3.98090900 | H | 8.77718300  | -0.73925500 | -1.37261400 |
| N | -7.39407300 | -1.08751600 | -2.27967500 | C | 2.54402700  | -3.56541800 | 0.57204800  |
| O | -6.45102300 | -2.76008900 | 2.90135500  | H | 2.33406200  | -4.34725900 | -0.15994700 |
| C | -7.51671200 | -3.20431200 | 3.71280100  | C | 1.98022900  | -3.78946200 | 1.90212700  |
| H | -7.07969700 | -3.41313800 | 4.68983900  | C | 1.50811700  | -5.07305300 | 2.20782500  |
| H | -7.97079900 | -4.12277400 | 3.31929000  | C | 1.76528000  | -2.75592400 | 2.82663400  |



|   |             |             |             |
|---|-------------|-------------|-------------|
| C | 0.84626600  | -5.32485000 | 3.40396300  |
| C | 1.08530800  | -3.00336800 | 4.00972000  |
| H | 2.12146800  | -1.75599700 | 2.60892100  |
| C | 0.62745100  | -4.28704300 | 4.30469800  |
| H | 0.49552000  | -6.32754100 | 3.62806800  |
| H | 0.91342100  | -2.19033600 | 4.70759300  |
| H | 0.10117800  | -4.47560100 | 5.23540600  |
| O | 3.02184800  | -3.27290500 | -2.27939400 |
| H | 1.66430500  | -5.88029100 | 1.49577800  |
| O | 4.72077500  | -2.63179700 | 2.56750000  |
| H | 7.06093700  | -0.02937300 | 0.28543300  |
| O | 5.33864300  | -0.20357200 | 2.19812200  |
| C | -0.43230300 | 0.94612100  | 1.33308800  |
| O | -1.17452300 | 0.05937600  | 1.70881900  |
| H | -0.74888200 | 2.00445600  | 1.42312900  |
| C | 0.89139300  | 0.71412300  | 0.67079400  |
| H | 1.55358000  | 1.57249400  | 0.82056900  |
| H | 1.36749000  | -0.18284300 | 1.07504900  |
| S | 0.57387900  | 0.50313300  | -1.13560400 |
| H | -0.64540200 | -1.13538300 | -0.82516400 |

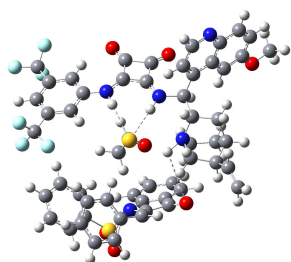

### Int9

-2709461.39 kcal/mol

|   |             |             |             |
|---|-------------|-------------|-------------|
| C | -4.46477300 | -2.35565200 | -1.31143800 |
| C | -3.98738500 | -3.57107000 | -0.50170400 |
| C | -2.25048500 | -2.22596500 | 0.68356300  |
| H | -5.37107400 | -1.95044400 | -0.85601300 |
| H | -4.80788900 | -4.28438800 | -0.39013000 |
| H | -2.25044700 | -1.29148800 | 1.24227800  |
| H | -1.34486200 | -2.76166900 | 0.96165400  |
| H | -4.73246000 | -2.64286000 | -2.33169100 |
| N | -2.10522500 | -1.90136700 | -0.77015500 |
| C | -1.77769400 | -3.14195000 | -1.54672100 |
| H | -0.75623200 | -3.42632300 | -1.29177300 |
| H | -1.80502500 | -2.86363400 | -2.60396800 |
| C | -2.78715900 | -4.25333000 | -1.19670700 |
| H | -2.30899100 | -4.92508300 | -0.47599600 |
| C | 3.13418800  | 4.21249200  | -0.92871900 |

|   |              |             |             |
|---|--------------|-------------|-------------|
| C | 1.97599100   | 3.47740900  | -1.11701000 |
| C | 0.78092700   | 3.88886700  | -0.50902100 |
| C | 0.76260000   | 5.04251400  | 0.27469400  |
| C | 1.94251700   | 5.76281200  | 0.44590900  |
| C | 3.13401400   | 5.36323400  | -0.14279200 |
| H | 1.98495500   | 2.58173900  | -1.73215400 |
| H | -0.16009700  | 5.37787900  | 0.74288600  |
| H | 4.04235700   | 5.93562400  | 0.00204900  |
| C | 1.91955200   | 6.97088300  | 1.34849000  |
| C | 4.41443500   | 3.79433300  | -1.59804000 |
| F | 1.96345100   | 6.60782600  | 2.64181800  |
| F | 0.80680600   | 7.69630800  | 1.17703600  |
| F | 2.97026800   | 7.77924300  | 1.12804500  |
| F | 4.77703100   | 4.65112900  | -2.56343400 |
| F | 5.43528100   | 3.75605900  | -0.71244400 |
| F | 4.33045800   | 2.57403000  | -2.15256400 |
| N | -0.33886800  | 3.08735000  | -0.72707100 |
| C | -1.54512200  | 3.11049100  | -0.10108000 |
| C | -2.53374400  | 2.13710000  | -0.12251300 |
| C | -3.43456300  | 2.90936800  | 0.75795200  |
| C | -2.34752200  | 4.00376800  | 0.77748400  |
| O | -2.20276900  | 5.08490200  | 1.29539200  |
| O | -4.52013900  | 2.71691400  | 1.24774500  |
| H | -0.14005000  | 2.22114000  | -1.23934900 |
| N | -2.58403200  | 0.93493500  | -0.71604500 |
| H | -1.70640700  | 0.60729700  | -1.13324500 |
| C | -8.91317100  | 0.43077100  | 0.20076900  |
| C | -8.65100300  | 1.00752400  | -1.01371700 |
| C | -7.33380400  | 1.08543100  | -1.52588200 |
| C | -6.26235300  | 0.54716900  | -0.75522100 |
| C | -6.55375900  | -0.03421200 | 0.49922700  |
| C | -7.84621300  | -0.09474700 | 0.97190500  |
| H | -9.93305500  | 0.38969400  | 0.56486700  |
| H | -9.44717600  | 1.42578900  | -1.62022400 |
| C | -4.81044700  | 1.25834900  | -2.53353700 |
| C | -5.94553500  | 1.76496300  | -3.20645100 |
| H | -3.82626700  | 1.37821300  | -2.97734900 |
| H | -5.82415300  | 2.25321300  | -4.17143400 |
| N | -7.16566200  | 1.68018700  | -2.73949500 |
| O | -8.01057000  | -0.67690200 | 2.18431900  |
| C | -9.29751700  | -0.67847600 | 2.76521500  |
| H | -9.18139500  | -1.14629700 | 3.74324000  |
| H | -10.00980900 | -1.26348500 | 2.16974900  |
| H | -9.68086900  | 0.34065200  | 2.89666100  |



|   |             |             |             |   |             |             |             |
|---|-------------|-------------|-------------|---|-------------|-------------|-------------|
| C | 2.47226700  | -2.26087700 | -1.41768100 | C | -5.24619600 | -0.60052900 | -2.98139600 |
| C | 2.69390700  | -3.31493700 | -0.53052100 | H | -5.19136300 | -1.62687400 | -2.60391400 |
| C | 3.98433900  | -3.78410800 | -0.34252200 | H | -5.68041400 | -0.64784600 | -3.98412100 |
| C | 5.06640200  | -3.20894700 | -1.00314800 | C | -7.01946900 | 2.65474200  | -1.92203000 |
| H | 3.36952400  | -0.86201900 | -2.77867600 | C | -7.93518600 | 3.32340500  | -2.61563900 |
| H | 1.87300500  | -3.74922600 | 0.02444800  | H | -6.98341700 | 2.76819700  | -0.83799600 |
| H | 6.07344600  | -3.56974200 | -0.82856600 | H | -8.65475100 | 3.97348400  | -2.12796800 |
| C | 4.25994000  | -4.87386100 | 0.65872700  | H | -8.00019900 | 3.24624500  | -3.69870500 |
| C | 5.98529300  | -1.41544600 | -2.49152400 | C | -3.24090700 | -1.00893900 | 1.25505500  |
| F | 3.13948000  | -5.41632700 | 1.14941500  | C | -3.25413200 | -0.84404900 | -0.26218300 |
| F | 4.96670400  | -4.39661700 | 1.70360500  | H | -3.72285200 | -1.71077300 | -0.72737500 |
| F | 4.99251800  | -5.86178300 | 0.11917100  | C | -4.08478000 | 0.41436600  | -0.59905600 |
| F | 7.08469300  | -2.17596300 | -2.59194600 | H | -3.81891700 | 1.20175400  | 0.10648200  |
| F | 5.69332500  | -0.95417100 | -3.71746100 | C | -1.21581900 | 4.10538300  | 0.33873300  |
| F | 6.31676600  | -0.34111500 | -1.74095000 | C | -0.09768400 | 4.75000900  | 0.88152900  |
| N | 1.19987000  | -1.68747300 | -1.57067300 | C | -0.15067800 | 6.09909200  | 1.23299700  |
| C | 0.02581100  | -2.33537600 | -1.38604900 | C | -1.34821100 | 6.77262900  | 1.02485400  |
| C | -1.27078600 | -1.93079500 | -1.09407900 | C | -2.46925000 | 6.13668900  | 0.47540400  |
| C | -1.81388300 | -3.28963800 | -1.32601200 | C | -2.40480600 | 4.79807500  | 0.12348700  |
| C | -0.36978600 | -3.76477900 | -1.52540800 | H | 0.70659200  | 6.60471600  | 1.65321400  |
| O | 0.20690700  | -4.80445700 | -1.71830200 | H | -1.40770300 | 7.82437800  | 1.28811100  |
| O | -2.93214200 | -3.74723500 | -1.42606900 | H | -3.38441900 | 6.69977000  | 0.31871600  |
| H | 1.19981200  | -0.69023500 | -1.76041900 | H | -3.25547600 | 4.28952500  | -0.31925700 |
| N | -1.90279900 | -0.77734100 | -0.81269700 | C | -0.83062400 | 2.73721600  | 0.02379400  |
| H | -1.40231700 | 0.09846600  | -0.60944600 | N | 0.99430100  | 3.83326100  | 0.90955200  |
| C | -5.36535500 | -3.97984100 | 3.41705000  | C | 0.49132000  | 2.58914000  | 0.38987200  |
| C | -4.61079200 | -3.03805200 | 4.06524800  | S | 1.93471700  | 3.81503200  | 2.34572800  |
| C | -3.89161100 | -2.04926800 | 3.35204200  | C | 3.53970400  | 3.35268000  | 1.74482000  |
| C | -3.96432000 | -2.04030800 | 1.92636400  | C | 4.35090600  | 2.61474200  | 2.60026300  |
| C | -4.73446700 | -3.03223700 | 1.27511800  | C | 5.65468300  | 2.33496900  | 2.20934900  |
| C | -5.42337600 | -3.98004000 | 2.00037700  | C | 6.12504500  | 2.77760200  | 0.97578000  |
| H | -5.90364900 | -4.72303900 | 3.99369300  | C | 5.29813900  | 3.51351600  | 0.12982100  |
| H | -4.54072400 | -3.02158700 | 5.14770500  | C | 3.99824800  | 3.81902200  | 0.51720600  |
| C | -2.51413500 | -0.12094300 | 2.01038400  | H | 3.95203500  | 2.23918400  | 3.53608200  |
| C | -2.49811700 | -0.23993200 | 3.41786200  | H | 6.29533100  | 1.74873300  | 2.85998200  |
| H | -1.95470100 | 0.68324000  | 1.53802300  | H | 7.13876200  | 2.54115300  | 0.66697500  |
| H | -1.91448800 | 0.46484000  | 4.00703100  | H | 5.66369100  | 3.84945300  | -0.83517000 |
| N | -3.16256000 | -1.15724500 | 4.07756700  | C | 1.25068700  | 1.43539700  | -0.14854100 |
| O | -6.13577200 | -4.88026700 | 1.28030700  | H | 0.44160900  | 0.74135800  | -0.38595600 |
| C | -6.77309000 | -5.93955500 | 1.96038600  | C | 2.20775000  | 0.61723800  | 0.70473600  |
| H | -7.22905000 | -6.55765300 | 1.18641500  | C | 3.53289600  | 0.36181000  | 0.36651800  |
| H | -7.55696300 | -5.57476300 | 2.63650400  | C | 1.66784400  | -0.01226400 | 1.83084300  |
| H | -6.05516800 | -6.54490400 | 2.52749300  | C | 4.30308600  | -0.51430200 | 1.12810700  |
| H | -4.76133400 | -3.11900300 | 0.19514400  | C | 2.43388100  | -0.88380800 | 2.59166000  |

|   |             |             |             |   |             |             |             |
|---|-------------|-------------|-------------|---|-------------|-------------|-------------|
| H | 0.63841100  | 0.19353900  | 2.11100300  | C | -3.21726600 | -2.06209100 | -0.86603100 |
| C | 3.75696300  | -1.14641400 | 2.23634000  | C | -2.15743600 | -2.82165200 | -0.37025000 |
| H | 5.33111900  | -0.70188200 | 0.83597900  | C | -2.41292200 | -4.06473300 | 0.21063000  |
| H | 1.99466600  | -1.36605100 | 3.45966800  | C | -3.72736200 | -4.49661100 | 0.33561300  |
| H | 4.34999400  | -1.84915200 | 2.81281900  | C | -4.79684500 | -3.73075300 | -0.11721500 |
| O | -1.56706100 | 1.86097300  | -0.59145600 | H | -3.02841600 | -1.09667800 | -1.32393200 |
| H | 3.99429000  | 0.84886700  | -0.48642400 | H | -1.60027700 | -4.67249900 | 0.59901300  |
| O | 1.45366300  | 2.78344700  | 3.24953900  | H | -5.81624200 | -4.07356300 | 0.00408900  |
| H | 3.33923100  | 4.38567100  | -0.13111900 | C | -3.98393100 | -5.77004200 | 1.09564100  |
| O | 2.01593100  | 5.19189500  | 2.80557100  | C | -5.62964600 | -1.60637000 | -1.19169700 |
| C | -0.50285600 | 1.71729200  | -3.06999800 | F | -5.21122900 | -6.26263100 | 0.86075000  |
| O | -1.47669700 | 2.11269000  | -3.67163400 | F | -3.89150200 | -5.55616300 | 2.42381100  |
| H | -0.39261000 | 0.64270300  | -2.81303400 | F | -3.09745100 | -6.72701200 | 0.78974400  |
| C | 0.65761200  | 2.61189500  | -2.68222000 | F | -6.83919500 | -2.17507900 | -1.06827800 |
| H | 1.07544200  | 3.04609800  | -3.59707400 | F | -5.64808900 | -0.46655600 | -0.47504700 |
| H | 0.27766900  | 3.44377000  | -2.07946700 | F | -5.47623400 | -1.25812900 | -2.47838000 |
| S | 2.02395000  | 1.77828800  | -1.83783500 | N | -0.88432300 | -2.25018800 | -0.42065400 |
| H | -2.73773900 | 1.36144000  | -1.80761600 | C | 0.22763300  | -2.64757900 | 0.21626600  |

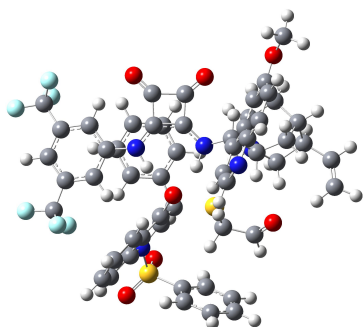

**TS2**

-2709467.16 kcal/mol

|   |             |             |             |   |             |             |             |
|---|-------------|-------------|-------------|---|-------------|-------------|-------------|
| C | 5.23097600  | 1.01976500  | 0.57344900  | C | 1.40619500  | -1.93950800 | 0.43167800  |
| C | 5.70632300  | 0.91630900  | 2.02956700  | C | 2.06407000  | -3.05238700 | 1.10351300  |
| C | 3.59481100  | -0.15903600 | 2.81329500  | C | 0.78036000  | -3.85850900 | 0.90351300  |
| H | 5.70326400  | 0.24225000  | -0.03118600 | O | 0.38250600  | -4.95604500 | 1.21143400  |
| H | 6.79856200  | 0.88199600  | 2.06066100  | O | 3.15569400  | -3.20918900 | 1.62627900  |
| H | 3.04399400  | -1.04690300 | 2.50883500  | H | -0.82259400 | -1.28494200 | -0.79032100 |
| H | 3.29058700  | 0.10806700  | 3.82837300  | N | 1.79326800  | -0.65753000 | 0.22144700  |
| H | 5.52763300  | 1.98333400  | 0.15068300  | H | 1.07147300  | -0.05899600 | -0.21473100 |
| N | 3.18531500  | 0.99427200  | 1.94410100  | C | 6.80380600  | -2.45680900 | -3.34899100 |
| C | 3.68510000  | 2.27626700  | 2.54081200  | C | 5.95477300  | -1.69118700 | -4.10416700 |
| H | 3.10333000  | 2.46228800  | 3.44587400  | C | 4.84174400  | -1.03357800 | -3.52809800 |
| H | 3.45696000  | 3.05853200  | 1.82039500  | C | 4.61521500  | -1.16206900 | -2.12659100 |
| C | 5.19516400  | 2.14911300  | 2.82030500  | C | 5.49089600  | -1.97510600 | -1.36842800 |
| H | 5.33261000  | 1.92770700  | 3.88654900  | C | 6.56236500  | -2.60858100 | -1.96060500 |
| C | -4.52210000 | -2.51299700 | -0.72633800 | H | 7.64498300  | -2.94940400 | -3.82257500 |
|   |             |             |             | H | 6.10696300  | -1.57081900 | -5.17153600 |
|   |             |             |             | C | 2.67409700  | 0.22223900  | -2.44898000 |
|   |             |             |             | C | 2.98834900  | 0.26383700  | -3.82707000 |
|   |             |             |             | H | 1.75880700  | 0.70018200  | -2.10760000 |
|   |             |             |             | H | 2.33824000  | 0.81357000  | -4.50495000 |
|   |             |             |             | N | 4.03526800  | -0.31597600 | -4.35870400 |
|   |             |             |             | O | 7.33701900  | -3.35994900 | -1.14131100 |
|   |             |             |             | C | 8.39248700  | -4.10851600 | -1.70547700 |
|   |             |             |             | H | 8.83809400  | -4.66282400 | -0.87904200 |
|   |             |             |             | H | 9.15448300  | -3.45924700 | -2.15503000 |
|   |             |             |             | H | 8.02644900  | -4.81728600 | -2.45837700 |



|   |             |             |             |   |             |             |             |
|---|-------------|-------------|-------------|---|-------------|-------------|-------------|
| C | 2.83689700  | 4.19568200  | -0.09984300 | H | -4.70285800 | 3.59480000  | -5.04027000 |
| C | 1.83931900  | 3.23339600  | -0.15033500 | H | -4.72948200 | 1.24802000  | -1.32424500 |
| C | 0.54580900  | 3.54041700  | 0.28336800  | C | -5.53547200 | -0.39038000 | 3.13157900  |
| C | 0.25669000  | 4.82747200  | 0.74469900  | H | -6.00135300 | 0.16572100  | 2.31208300  |
| C | 1.27090400  | 5.77630900  | 0.77408800  | H | -6.01129600 | -0.06046800 | 4.05957400  |
| C | 2.56574600  | 5.47726700  | 0.36300100  | C | -5.14186900 | -4.10544800 | 4.10108600  |
| H | 2.06251200  | 2.24509300  | -0.53854500 | C | -5.71808300 | -4.69181000 | 5.14571400  |
| H | -0.74991200 | 5.09116800  | 1.05544100  | H | -4.83615300 | -4.71057900 | 3.24714600  |
| H | 3.34410400  | 6.23146500  | 0.39413800  | H | -5.90727600 | -5.76059400 | 5.16475600  |
| C | 0.99329100  | 7.17031000  | 1.27654000  | H | -6.02122000 | -4.12514500 | 6.02360700  |
| C | 4.24280500  | 3.84094300  | -0.50451500 | C | -3.78181000 | -1.38103600 | -1.16276600 |
| F | 1.35572000  | 8.09305900  | 0.36711800  | C | -3.72668900 | -0.70490500 | 0.20927000  |
| F | 1.69968400  | 7.42937800  | 2.39246400  | H | -4.59194300 | -0.04462700 | 0.31651300  |
| F | -0.29802400 | 7.36711700  | 1.56155000  | C | -3.79610700 | -1.75683200 | 1.33556500  |
| F | 5.02463200  | 3.65156100  | 0.57924700  | H | -3.11200300 | -2.57513400 | 1.12192200  |
| F | 4.29473800  | 2.71125000  | -1.22465600 | C | 0.77598100  | -1.77065800 | -2.39973000 |
| F | 4.81343800  | 4.81607300  | -1.22765200 | C | 1.94959400  | -2.52845200 | -2.42197900 |
| N | -0.39299700 | 2.50758000  | 0.23658400  | C | 2.06304400  | -3.61407700 | -3.28563600 |
| C | -1.71967600 | 2.53547500  | 0.46524900  | C | 0.97790100  | -3.88965100 | -4.11395400 |
| C | -2.64278900 | 1.48525000  | 0.44518400  | C | -0.19790400 | -3.12681700 | -4.09737500 |
| C | -3.76669100 | 2.38089200  | 0.75444500  | C | -0.30435700 | -2.05194600 | -3.23038200 |
| C | -2.77354100 | 3.53487300  | 0.79148800  | H | 2.96439300  | -4.21032700 | -3.33440000 |
| O | -2.82576800 | 4.72074900  | 1.02055000  | H | 1.05079800  | -4.73199100 | -4.79549900 |
| O | -4.96363000 | 2.22098400  | 0.91493000  | H | -1.02848200 | -3.37818600 | -4.74868600 |
| H | -0.03723800 | 1.60769900  | -0.09223500 | H | -1.19831300 | -1.43848300 | -3.18113600 |
| N | -2.55396300 | 0.15717700  | 0.28393600  | C | 0.90538300  | -0.75320000 | -1.37248500 |
| H | -1.64118300 | -0.23806600 | 0.07521400  | N | 2.85962600  | -2.06222600 | -1.42924300 |
| C | -4.74611000 | 0.80476900  | -4.68250700 | C | 2.21258800  | -0.99875600 | -0.71703100 |
| C | -4.34666100 | -0.50462900 | -4.75418400 | S | 4.53918500  | -1.95603900 | -1.78667700 |
| C | -4.04427700 | -1.24723500 | -3.58991800 | C | 5.26174800  | -3.00274900 | -0.54868200 |
| C | -4.14474500 | -0.61018200 | -2.31810700 | C | 6.43512000  | -2.58111700 | 0.06188700  |
| C | -4.58308700 | 0.72937900  | -2.26364900 | C | 7.05919700  | -3.43504100 | 0.96601900  |
| C | -4.87481600 | 1.42833600  | -3.41724000 | C | 6.50783900  | -4.68027400 | 1.24745600  |
| H | -4.96927900 | 1.34692700  | -5.59395900 | C | 5.32614300  | -5.08538700 | 0.62744700  |
| H | -4.25500100 | -1.01204300 | -5.70871900 | C | 4.69768500  | -4.24770500 | -0.28370000 |
| C | -3.41837700 | -2.69053600 | -1.36191800 | H | 6.83160300  | -1.59401400 | -0.14661800 |
| C | -3.39239100 | -3.22972500 | -2.67212100 | H | 7.96997100  | -3.11577000 | 1.46168600  |
| H | -3.11775500 | -3.34820200 | -0.55351800 | H | 6.99595500  | -5.33913400 | 1.95904300  |
| H | -3.09608300 | -4.26799600 | -2.80793900 | H | 4.89529900  | -6.05539700 | 0.85401400  |
| N | -3.67101400 | -2.55059200 | -3.75354500 | C | 2.53804200  | -0.41649400 | 0.44374300  |
| O | -5.28067600 | 2.70694000  | -3.24801400 | H | 1.83472200  | 0.34285600  | 0.77808900  |
| C | -5.57808700 | 3.48411700  | -4.38794000 | C | 3.65674900  | -0.71655400 | 1.35813500  |
| H | -5.86885200 | 4.46428200  | -4.00975400 | C | 3.63463700  | -1.89726900 | 2.10404200  |
| H | -6.41027100 | 3.05731900  | -4.96191000 | C | 4.68456900  | 0.20825800  | 1.55362700  |

|   |             |             |             |
|---|-------------|-------------|-------------|
| C | 4.63386600  | -2.15018200 | 3.03696700  |
| C | 5.68773600  | -0.05514100 | 2.47965200  |
| H | 4.70515100  | 1.12392200  | 0.97356600  |
| C | 5.66163300  | -1.23096900 | 3.22556800  |
| H | 4.60788300  | -3.06801500 | 3.61601300  |
| H | 6.48616600  | 0.66659100  | 2.62358800  |
| H | 6.44133200  | -1.42936300 | 3.95534500  |
| O | 0.06642700  | 0.08474200  | -1.05031000 |
| H | 2.81397100  | -2.59506000 | 1.97310600  |
| O | 4.96783700  | -0.59032000 | -1.56510700 |
| H | 3.77316600  | -4.54710600 | -0.76770600 |
| O | 4.71336600  | -2.59076300 | -3.08000800 |
| C | -0.79813000 | -3.95936000 | 1.55622900  |
| O | -1.93967700 | -4.37758000 | 1.42236300  |
| H | -0.10853800 | -4.45478000 | 2.26631700  |
| C | -0.25415500 | -2.74213700 | 0.89352000  |
| H | 0.76659800  | -2.92554400 | 0.53727000  |
| H | -0.88052000 | -2.46572100 | 0.03782600  |
| S | -0.21089700 | -1.48138300 | 2.23402900  |
| H | -2.22868100 | -1.09376100 | 2.51950900  |

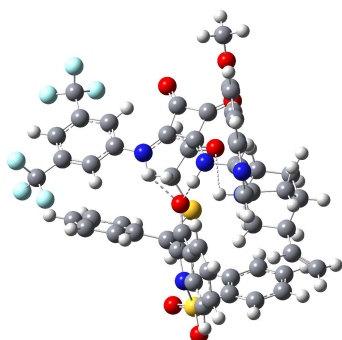

**Int11**

-2709471.06 kcal/mol

|   |            |             |             |
|---|------------|-------------|-------------|
| C | 3.99421100 | 2.43420700  | -1.00633800 |
| C | 4.48766600 | 1.49261500  | -2.10591900 |
| C | 2.05986500 | 1.08171000  | -2.62697200 |
| H | 3.75567500 | 3.41499400  | -1.43261600 |
| H | 5.44465000 | 1.84581900  | -2.49892800 |
| H | 1.38000100 | 1.93459100  | -2.64661600 |
| H | 1.56603900 | 0.25009300  | -3.13101700 |
| H | 4.76846000 | 2.59349100  | -0.25218000 |
| N | 2.25825500 | 0.67432600  | -1.19920000 |
| C | 3.26584600 | -0.44680400 | -1.13952000 |
| H | 2.90176500 | -1.21856600 | -1.81977200 |
| H | 3.23208800 | -0.85233800 | -0.12895800 |
| C | 4.66766800 | 0.08084900  | -1.50721300 |

|   |             |             |             |
|---|-------------|-------------|-------------|
| H | 5.08372100  | -0.56550400 | -2.28632000 |
| C | -5.31639500 | -0.89681300 | 1.60440800  |
| C | -4.04994000 | -0.35232300 | 1.47312300  |
| C | -3.67219100 | 0.25597200  | 0.27186700  |
| C | -4.57553400 | 0.31378900  | -0.78672300 |
| C | -5.84094700 | -0.24786000 | -0.63495700 |
| C | -6.22484400 | -0.85697600 | 0.54965500  |
| H | -3.35246200 | -0.38570100 | 2.30252600  |
| H | -4.31088000 | 0.81233700  | -1.71471200 |
| H | -7.21250700 | -1.29001000 | 0.65492700  |
| C | -6.81029100 | -0.14321800 | -1.78433800 |
| C | -5.75871800 | -1.51465000 | 2.90334100  |
| F | -6.20661000 | -0.38816100 | -2.95814000 |
| F | -7.34446700 | 1.08549100  | -1.86224600 |
| F | -7.82623400 | -1.01359000 | -1.66271000 |
| F | -6.13387300 | -2.79734800 | 2.73973500  |
| F | -4.79015900 | -1.49960400 | 3.83537700  |
| F | -6.81657000 | -0.86651500 | 3.41546000  |
| N | -2.37666300 | 0.78976500  | 0.20041600  |
| C | -1.90017700 | 1.70678900  | -0.67114700 |
| C | -0.66039000 | 2.34459700  | -0.66194500 |
| C | -0.92695500 | 3.04040300  | -1.92932800 |
| C | -2.30969400 | 2.38912300  | -1.92996300 |
| O | -3.26874000 | 2.38331300  | -2.66704200 |
| O | -0.26941100 | 3.74991400  | -2.66468700 |
| H | -1.64849400 | 0.31529800  | 0.74335600  |
| N | 0.36820700  | 2.30320000  | 0.19761300  |
| H | 0.38104400  | 1.46130500  | 0.78606800  |
| C | 0.31892700  | 7.72490700  | 1.33111700  |
| C | 1.21665900  | 7.27394000  | 2.26325000  |
| C | 1.81185100  | 5.99617200  | 2.15389200  |
| C | 1.46320600  | 5.16306400  | 1.05048400  |
| C | 0.54818900  | 5.65035900  | 0.09324800  |
| C | -0.01692800 | 6.90223900  | 0.22769200  |
| H | -0.12160000 | 8.70865000  | 1.44410600  |
| H | 1.49834400  | 7.88486700  | 3.11427000  |
| C | 2.96812300  | 3.53772300  | 1.97448500  |
| C | 3.24949500  | 4.45268300  | 3.01832800  |
| H | 3.47460200  | 2.57920300  | 2.00267400  |
| H | 3.96043100  | 4.17204900  | 3.79375300  |
| N | 2.69892700  | 5.63271500  | 3.12374500  |
| O | -0.88360600 | 7.26843600  | -0.74355900 |
| C | -1.50419400 | 8.53322300  | -0.66212700 |
| H | -2.15188000 | 8.60135700  | -1.53632800 |





|   |             |             |             |   |             |             |             |
|---|-------------|-------------|-------------|---|-------------|-------------|-------------|
| H | -2.79162100 | 4.36819100  | -2.70971800 | H | -7.17571500 | -6.05345000 | -1.03187900 |
| C | 3.88185900  | -2.79473500 | 1.84265700  | H | -5.81908100 | -6.72415700 | -0.07312100 |
| C | 2.50696600  | -2.62838000 | 1.79257200  | H | -4.33555200 | -2.69033400 | -0.96549100 |
| C | 1.81410100  | -2.88426000 | 0.60473900  | C | -3.82251100 | 1.94203800  | -3.28504900 |
| C | 2.50863600  | -3.33706000 | -0.51614200 | H | -4.68180800 | 1.32235400  | -3.55712100 |
| C | 3.89491100  | -3.44020400 | -0.45635400 | H | -3.56638600 | 2.54439300  | -4.16197800 |
| C | 4.59645000  | -3.17428200 | 0.71112700  | C | -3.23057200 | 4.72986700  | -0.66615800 |
| H | 1.96371700  | -2.26882500 | 2.66061100  | C | -3.30938200 | 6.04995000  | -0.79887100 |
| H | 1.97956500  | -3.59810500 | -1.42915000 | H | -3.31872500 | 4.28912500  | 0.32691800  |
| H | 5.67554200  | -3.25348600 | 0.74015900  | H | -3.47941100 | 6.69563200  | 0.05702400  |
| C | 4.63494700  | -3.72919000 | -1.73315300 | H | -3.20154900 | 6.53654500  | -1.76599100 |
| C | 4.59742600  | -2.62395800 | 3.15648500  | C | -4.48188000 | -0.56033600 | 0.85700100  |
| F | 4.70817100  | -2.61709300 | -2.50053100 | C | -3.43729400 | -0.28157700 | -0.21291400 |
| F | 4.02370700  | -4.66606800 | -2.47079400 | H | -3.78023900 | -0.72610600 | -1.15072000 |
| F | 5.89397800  | -4.13559300 | -1.51538200 | C | -3.22030700 | 1.22110200  | -0.45186200 |
| F | 5.87470500  | -2.24402100 | 2.99181100  | H | -2.78092100 | 1.66690400  | 0.44671900  |
| F | 3.99957600  | -1.71626500 | 3.94432400  | C | -0.95403800 | 1.90030900  | 2.40695200  |
| F | 4.62007300  | -3.78184100 | 3.84168500  | C | -0.54148900 | 3.12618500  | 1.87846200  |
| N | 0.44862300  | -2.56551800 | 0.59999100  | C | -1.22674800 | 4.30307500  | 2.19201000  |
| C | -0.40602500 | -2.58520600 | -0.44344000 | C | -2.31275200 | 4.20643700  | 3.05633800  |
| C | -1.59159800 | -1.85694200 | -0.60528900 | C | -2.72030700 | 2.98028400  | 3.60005100  |
| C | -1.84283900 | -2.42761700 | -1.93432600 | C | -2.04013100 | 1.81512000  | 3.27508100  |
| C | -0.53765200 | -3.20148400 | -1.78600600 | H | -0.92727200 | 5.25660900  | 1.78215900  |
| O | 0.14668200  | -3.89838100 | -2.50627200 | H | -2.85304800 | 5.11208600  | 3.31646700  |
| O | -2.70411600 | -2.27145900 | -2.78129900 | H | -3.56697400 | 2.94713500  | 4.27991400  |
| H | 0.19354100  | -1.85250700 | 1.31432300  | H | -2.33045300 | 0.84639700  | 3.67053900  |
| N | -2.17783900 | -0.91570700 | 0.13849000  | C | -0.12897000 | 0.83996400  | 1.83508400  |
| H | -1.71201700 | -0.68681300 | 1.04212600  | N | 0.53399800  | 2.88926500  | 0.97137600  |
| C | -6.56742500 | -4.25679900 | 1.04729300  | C | 0.76900500  | 1.45546800  | 0.98301900  |
| C | -6.75363500 | -3.29189700 | 2.00264200  | S | 1.82252800  | 4.03081800  | 1.02956000  |
| C | -6.06733200 | -2.05703100 | 1.94505000  | C | 2.46438900  | 3.96624100  | -0.62207500 |
| C | -5.16499700 | -1.81946900 | 0.86760200  | C | 3.76297000  | 3.52835900  | -0.83468100 |
| C | -4.99321300 | -2.82022000 | -0.11317600 | C | 4.26059700  | 3.52804400  | -2.13576100 |
| C | -5.67580500 | -4.01653500 | -0.02750600 | C | 3.46727700  | 3.97056700  | -3.18769400 |
| H | -7.10645200 | -5.19401700 | 1.12163700  | C | 2.17271000  | 4.43672600  | -2.95167500 |
| H | -7.43293800 | -3.44778800 | 2.83395400  | C | 1.66613900  | 4.44380400  | -1.66112100 |
| C | -4.74983200 | 0.32645800  | 1.86654000  | H | 4.36316900  | 3.18449500  | 0.00025700  |
| C | -5.67311500 | -0.01504700 | 2.88407200  | H | 5.26960400  | 3.17371400  | -2.31995700 |
| H | -4.25535400 | 1.28909100  | 1.92994900  | H | 3.86000900  | 3.96425200  | -4.19997500 |
| H | -5.87361800 | 0.69804300  | 3.68187500  | H | 1.56580200  | 4.79925500  | -3.77536700 |
| N | -6.31152000 | -1.15451900 | 2.93788700  | C | 1.64624800  | 0.66670600  | 0.06062000  |
| O | -5.43655300 | -4.90782500 | -1.01643800 | H | 1.28718900  | -0.35032800 | 0.23406800  |
| C | -6.08504800 | -6.16062500 | -0.97614800 | C | 3.14513300  | 0.62508500  | 0.35250300  |
| H | -5.73351100 | -6.70388500 | -1.85351800 | C | 4.10852300  | 0.39249200  | -0.62844900 |

|   |             |             |             |
|---|-------------|-------------|-------------|
| C | 3.56143900  | 0.71003800  | 1.68261600  |
| C | 5.45297800  | 0.25354800  | -0.29573400 |
| C | 4.90516900  | 0.59403500  | 2.01676200  |
| H | 2.82549500  | 0.89127200  | 2.45840700  |
| C | 5.85786600  | 0.35770800  | 1.03016500  |
| H | 6.18051200  | 0.06604100  | -1.08015500 |
| H | 5.20451700  | 0.67314200  | 3.05633700  |
| H | 6.90520400  | 0.25146100  | 1.29555300  |
| O | -0.35449300 | -0.41515500 | 2.05640100  |
| H | 3.82889700  | 0.36656500  | -1.67373600 |
| O | 2.84832600  | 3.59907900  | 1.96003400  |
| H | 0.67154900  | 4.82370900  | -1.44882200 |
| O | 1.18850200  | 5.33051100  | 1.18350600  |
| C | 0.69913500  | -0.82661200 | -3.73483600 |
| O | -0.02251600 | 0.00575300  | -4.23420800 |
| H | 0.79919500  | -1.83519300 | -4.17662900 |
| C | 1.54317700  | -0.59865500 | -2.50827800 |
| H | 1.39318600  | -1.42430200 | -1.81049600 |
| H | 2.59011100  | -0.68059300 | -2.82604700 |
| S | 1.17779600  | 0.99184900  | -1.71059700 |
| H | -1.32050400 | 0.89962900  | -1.28396500 |

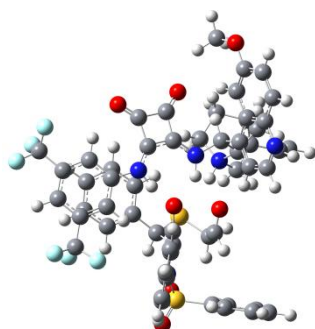

**TS4**

-2709466.96 kcal/mol

|   |            |             |             |
|---|------------|-------------|-------------|
| C | 5.13668400 | -1.38981500 | -0.87722900 |
| C | 5.23123400 | -1.36953700 | -2.41043400 |
| C | 2.97768500 | -0.30539400 | -2.68035600 |
| H | 5.72072500 | -0.56599000 | -0.45454300 |
| H | 6.27819200 | -1.34731800 | -2.72306600 |
| H | 2.52503600 | 0.59490600  | -2.27268300 |
| H | 2.41231300 | -0.59802100 | -3.56772100 |
| H | 5.56233000 | -2.31143100 | -0.47134900 |
| N | 2.79946900 | -1.41164300 | -1.69005900 |
| C | 3.14162300 | -2.71440000 | -2.34021800 |
| H | 2.35909800 | -2.92526300 | -3.07077800 |
| H | 3.09160700 | -3.47305300 | -1.55518600 |
| C | 4.54050000 | -2.62594300 | -2.99111300 |

|   |             |             |             |
|---|-------------|-------------|-------------|
| H | 4.41979200  | -2.47092000 | -4.06992500 |
| C | -4.10644100 | 3.10178700  | 0.61359500  |
| C | -2.87385800 | 2.50270300  | 0.80813500  |
| C | -1.70208000 | 3.18107500  | 0.46155600  |
| C | -1.77538300 | 4.47380800  | -0.05319800 |
| C | -3.02617800 | 5.05232600  | -0.24586100 |
| C | -4.19919100 | 4.38251700  | 0.07748600  |
| H | -2.82116100 | 1.49332900  | 1.20137600  |
| H | -0.87174400 | 5.01210200  | -0.32667400 |
| H | -5.16434500 | 4.84865200  | -0.07934300 |
| C | -3.09601100 | 6.39827900  | -0.91617400 |
| C | -5.36143400 | 2.32148100  | 0.89764900  |
| F | -2.10378600 | 7.20841800  | -0.52491200 |
| F | -4.25688500 | 7.02656200  | -0.66802500 |
| F | -2.99708000 | 6.27199000  | -2.25595000 |
| F | -6.34237200 | 3.11287500  | 1.36313600  |
| F | -5.83517600 | 1.73127700  | -0.21756300 |
| F | -5.15970100 | 1.35001500  | 1.79971800  |
| N | -0.50528800 | 2.47760700  | 0.62888500  |
| C | 0.69573200  | 2.71828100  | 0.07659900  |
| C | 1.78879600  | 1.85782400  | -0.07619800 |
| C | 2.60647100  | 2.89587900  | -0.71025700 |
| C | 1.43806300  | 3.85788900  | -0.53051800 |
| O | 1.20877900  | 5.01342200  | -0.80278400 |
| O | 3.72634400  | 2.92738000  | -1.19843600 |
| H | -0.63458000 | 1.48841100  | 0.87291500  |
| N | 2.02056900  | 0.55144300  | 0.14654200  |
| H | 1.25449400  | -0.03696900 | 0.48718400  |
| C | 6.93512700  | 2.36002900  | 3.38605600  |
| C | 6.31885600  | 1.39050600  | 4.11913600  |
| C | 5.27621000  | 0.59984700  | 3.55944200  |
| C | 4.89991400  | 0.82179200  | 2.20397300  |
| C | 5.54894300  | 1.84562100  | 1.45817200  |
| C | 6.53689700  | 2.60318200  | 2.04241800  |
| H | 7.72368000  | 2.97696100  | 3.80398400  |
| H | 6.59372400  | 1.19727400  | 5.15061400  |
| C | 3.26748500  | -0.92131300 | 2.51585800  |
| C | 3.70984100  | -1.03897500 | 3.84837300  |
| H | 2.45058700  | -1.54735400 | 2.16056000  |
| H | 3.23823300  | -1.76279900 | 4.51037000  |
| N | 4.68675500  | -0.32525900 | 4.36017700  |
| O | 7.19294100  | 3.61241300  | 1.43208400  |
| C | 6.82132900  | 3.93318800  | 0.10406200  |
| H | 5.76296700  | 4.20728900  | 0.03345800  |



|   |             |             |             |   |             |             |             |
|---|-------------|-------------|-------------|---|-------------|-------------|-------------|
| C | -4.80854900 | 1.96613600  | -0.60537300 | H | 2.31732200  | 3.94677900  | 5.75965400  |
| C | -3.46251200 | 1.67387500  | -0.77843900 | H | 3.35867400  | 2.91223800  | 1.65713100  |
| C | -2.51267600 | 2.69577300  | -0.68928500 | C | 5.95199700  | 2.84618900  | -2.80762900 |
| C | -2.92360400 | 4.00376600  | -0.43056000 | H | 6.32175900  | 3.51876600  | -2.02920600 |
| C | -4.27773400 | 4.26943300  | -0.26031100 | H | 6.37674300  | 3.18278800  | -3.75883900 |
| C | -5.23209600 | 3.26422100  | -0.34385000 | C | 6.38868000  | -0.92901100 | -3.50174900 |
| H | -3.14274600 | 0.65474900  | -0.98045400 | C | 5.59022200  | -1.98122000 | -3.34061800 |
| H | -2.19785400 | 4.80901100  | -0.35439500 | H | 7.46659900  | -1.08292000 | -3.44771800 |
| H | -6.28260200 | 3.48633200  | -0.21111700 | H | 6.01321300  | -2.96617700 | -3.16907000 |
| C | -4.68508100 | 5.69272000  | 0.02151100  | H | 4.50432100  | -1.92538800 | -3.36735500 |
| C | -5.80475200 | 0.83979200  | -0.68031200 | C | 3.14535400  | 0.29915300  | 0.64758800  |
| F | -4.13365600 | 6.14253800  | 1.15999500  | C | 3.20590400  | 1.26827700  | -0.51722100 |
| F | -6.01623800 | 5.82456900  | 0.14019000  | H | 3.57939600  | 2.23420700  | -0.17642200 |
| F | -4.28585200 | 6.51797900  | -0.96050200 | C | 4.16500500  | 0.75967000  | -1.60217300 |
| F | -5.62903200 | 0.10284300  | -1.78693500 | H | 3.92504300  | -0.27089500 | -1.85287800 |
| F | -5.67787600 | 0.00802300  | 0.37228100  | C | -0.58629800 | -0.63320400 | 1.24654600  |
| F | -7.07153500 | 1.28139600  | -0.68432200 | C | -1.15754200 | -1.69803500 | 1.95903000  |
| N | -1.17365200 | 2.33301700  | -0.86949500 | C | -1.27160200 | -1.65721000 | 3.34905800  |
| C | -0.07358900 | 3.07839000  | -0.72241000 | C | -0.79838500 | -0.52540600 | 4.00095200  |
| C | 1.26389000  | 2.68023500  | -0.79455000 | C | -0.24262700 | 0.55104200  | 3.29794300  |
| C | 1.77525300  | 4.01524200  | -0.52079000 | C | -0.13816000 | 0.50399600  | 1.91770800  |
| C | 0.32885100  | 4.49433100  | -0.42041100 | H | -1.73705500 | -2.46746200 | 3.89548000  |
| O | -0.22984500 | 5.54168500  | -0.20742100 | H | -0.88234200 | -0.47048700 | 5.08229300  |
| O | 2.89134300  | 4.50387300  | -0.42402700 | H | 0.11508300  | 1.42302300  | 3.83670300  |
| H | -0.97614700 | 1.31894100  | -1.03386200 | H | 0.29231100  | 1.33462600  | 1.36870100  |
| N | 1.86949700  | 1.49595300  | -1.07601700 | C | -0.64394000 | -0.96879000 | -0.16926400 |
| H | 1.21409200  | 0.68553900  | -1.07835700 | N | -1.58475900 | -2.67902400 | 1.03495700  |
| C | 3.15792800  | 1.47921200  | 4.72341000  | C | -1.24386200 | -2.20447200 | -0.27368400 |
| C | 3.04493800  | 0.16025800  | 4.37027400  | S | -1.54519300 | -4.31521200 | 1.46712900  |
| C | 3.03522400  | -0.24164300 | 3.01490200  | C | 0.17811400  | -4.72323700 | 1.70520700  |
| C | 3.17194500  | 0.75267700  | 2.00171100  | C | 0.87679200  | -5.30713000 | 0.65105300  |
| C | 3.28310700  | 2.10901400  | 2.38299000  | C | 2.20128700  | -5.68457600 | 0.85116000  |
| C | 3.27057500  | 2.46911300  | 3.71455400  | C | 2.80880400  | -5.47947200 | 2.08896300  |
| H | 3.15101200  | 1.75543300  | 5.77141400  | C | 2.09918600  | -4.88733300 | 3.13109100  |
| H | 2.93615400  | -0.61534700 | 5.12065200  | C | 0.77421600  | -4.50798500 | 2.94513500  |
| C | 2.95385100  | -1.03855000 | 0.41666800  | H | 0.37522700  | -5.47511400 | -0.29663100 |
| C | 2.80547500  | -1.93205800 | 1.49951700  | H | 2.75377900  | -6.15369500 | 0.04259500  |
| H | 2.88173100  | -1.43015600 | -0.59297800 | H | 3.84119700  | -5.77958500 | 2.24187200  |
| H | 2.64162200  | -2.98747300 | 1.29997800  | H | 2.57774500  | -4.71069400 | 4.08796300  |
| N | 2.85950400  | -1.56662000 | 2.75498700  | C | -1.71858700 | -2.71287000 | -1.59066400 |
| O | 3.37480600  | 3.79370700  | 3.97312300  | H | -1.70592600 | -1.81473700 | -2.21907300 |
| C | 3.27555300  | 4.23534900  | 5.30981300  | C | -3.13386400 | -3.26241000 | -1.63770000 |
| H | 3.33795300  | 5.32293600  | 5.26782800  | C | -3.50965000 | -4.33427000 | -2.44524100 |
| H | 4.09844400  | 3.85113300  | 5.92585000  | C | -4.11823100 | -2.60864700 | -0.89321100 |

|   |             |             |             |
|---|-------------|-------------|-------------|
| C | -4.83662100 | -4.75012200 | -2.49918100 |
| C | -5.44364300 | -3.02159300 | -0.94739600 |
| H | -3.84553700 | -1.77578300 | -0.25271600 |
| C | -5.80909900 | -4.09746300 | -1.75018600 |
| H | -5.10643300 | -5.59405600 | -3.12758800 |
| H | -6.18812300 | -2.49521100 | -0.35963800 |
| H | -6.84371300 | -4.42529300 | -1.78976400 |
| O | -0.26923000 | -0.21107000 | -1.17067300 |
| H | -2.76920100 | -4.86752000 | -3.03319300 |
| O | -2.01724000 | -5.06616900 | 0.32525900  |
| H | 0.20738900  | -4.06141800 | 3.75309600  |
| O | -2.19955200 | -4.40219600 | 2.75972700  |
| C | 1.11157300  | -1.59946100 | -2.97343000 |
| O | 2.17419800  | -1.01237000 | -3.10635200 |
| H | 0.20737200  | -1.24587300 | -3.49015800 |
| C | 0.99475900  | -2.86765900 | -2.16450900 |
| H | 1.86426500  | -3.49961100 | -2.37260100 |
| H | 1.02904300  | -2.60282600 | -1.09850800 |
| S | -0.49800100 | -3.84041400 | -2.46230400 |
| H | 2.86730300  | 1.49844100  | -2.96581500 |

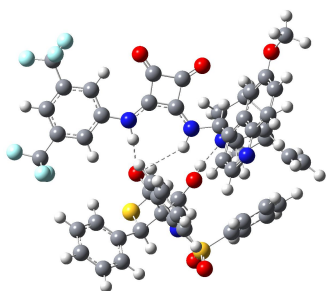

**Int13**

-2709492.28 kcal/mol

|   |            |             |             |
|---|------------|-------------|-------------|
| C | 4.63022700 | 1.36342700  | -1.26730000 |
| C | 4.90405000 | 1.67514900  | -2.74697300 |
| C | 2.46078900 | 1.65530200  | -3.27969800 |
| H | 4.70152100 | 2.28528900  | -0.68057200 |
| H | 5.85208800 | 2.21143600  | -2.85013500 |
| H | 1.61119600 | 2.20178900  | -2.86835300 |
| H | 2.18305500 | 1.34461500  | -4.29181600 |
| H | 5.38415000 | 0.68217300  | -0.85998300 |
| N | 2.67313700 | 0.42350900  | -2.49578800 |
| C | 3.65130600 | -0.42112700 | -3.20037300 |
| H | 3.17634400 | -0.82180300 | -4.10227500 |
| H | 3.88025900 | -1.26931400 | -2.54733900 |
| C | 4.94611700 | 0.36399700  | -3.56519100 |
| H | 4.91369000 | 0.63121300  | -4.62910600 |

|   |             |             |             |
|---|-------------|-------------|-------------|
| C | -5.92326300 | 0.84163100  | -0.28345100 |
| C | -4.53927300 | 0.74098000  | -0.27258700 |
| C | -3.75285000 | 1.89331300  | -0.37522400 |
| C | -4.36965900 | 3.14179100  | -0.48168800 |
| C | -5.75829000 | 3.21409600  | -0.48438700 |
| C | -6.55132600 | 2.07671900  | -0.38631600 |
| H | -4.06406300 | -0.23281500 | -0.20016400 |
| H | -3.77504100 | 4.04709700  | -0.57345900 |
| H | -7.63095700 | 2.15084000  | -0.40184600 |
| C | -6.40498600 | 4.57492100  | -0.54570200 |
| C | -6.73032400 | -0.42129200 | -0.15529900 |
| F | -5.76328600 | 5.39261000  | -1.39102600 |
| F | -6.40130100 | 5.16796700  | 0.66071400  |
| F | -7.68599100 | 4.50136100  | -0.94614800 |
| F | -8.02273400 | -0.23572000 | -0.45318200 |
| F | -6.26348300 | -1.38982800 | -0.96761900 |
| F | -6.67600400 | -0.91538400 | 1.09759100  |
| N | -2.36473600 | 1.71244900  | -0.36500000 |
| C | -1.37552700 | 2.61706900  | -0.55567800 |
| C | 0.00678200  | 2.42798500  | -0.61458100 |
| C | 0.25613600  | 3.85972800  | -0.87355600 |
| C | -1.24466100 | 4.08882900  | -0.74100500 |
| O | -1.98316300 | 5.04498000  | -0.78426300 |
| O | 1.23919000  | 4.52561400  | -1.12495200 |
| H | -2.07885600 | 0.73456800  | -0.32642700 |
| N | 0.85321800  | 1.39145300  | -0.54724200 |
| H | 0.52251000  | 0.43507400  | -0.47352900 |
| C | 4.56333600  | 4.56771400  | 3.41293400  |
| C | 4.26548200  | 3.35107100  | 3.96831700  |
| C | 3.61043000  | 2.34185300  | 3.22399500  |
| C | 3.26701800  | 2.60232200  | 1.86313900  |
| C | 3.56589600  | 3.87094500  | 1.31371200  |
| C | 4.20159900  | 4.83393000  | 2.06820500  |
| H | 5.06414600  | 5.32012200  | 4.01110600  |
| H | 4.52017300  | 3.12676800  | 4.99881500  |
| C | 2.35705800  | 0.37893400  | 1.81138200  |
| C | 2.71969700  | 0.24154300  | 3.16887100  |
| H | 1.87621800  | -0.45221700 | 1.30200200  |
| H | 2.48954300  | -0.68500700 | 3.69233100  |
| N | 3.33763900  | 1.16757000  | 3.85933600  |
| O | 4.44441100  | 6.01283700  | 1.44774900  |
| C | 5.01481000  | 7.06710800  | 2.19142500  |
| H | 5.07347700  | 7.91436300  | 1.50771000  |
| H | 6.02475600  | 6.81711700  | 2.54108800  |



|   |             |             |             |   |             |             |             |
|---|-------------|-------------|-------------|---|-------------|-------------|-------------|
| H | 4.76924500  | 6.17655000  | -1.06691400 | H | -5.34565500 | 1.29082200  | 3.52192700  |
| C | -4.57209400 | -1.90493200 | 0.26877800  | H | -5.17679100 | 0.33249700  | 2.01732000  |
| C | -3.48145600 | -1.12364300 | -0.08937000 | H | -1.78884200 | 3.12632400  | 1.71310100  |
| C | -3.67637400 | 0.10326700  | -0.72592000 | C | 2.28659900  | 6.64382600  | -0.08615900 |
| C | -4.97435800 | 0.54730600  | -0.99294700 | H | 1.65898800  | 7.09052900  | 0.69307900  |
| C | -6.04903500 | -0.25234500 | -0.62474900 | H | 2.72059200  | 7.46981300  | -0.66180000 |
| C | -5.86845300 | -1.48400400 | 0.00180100  | C | 5.46849600  | 4.45212500  | -0.05275400 |
| H | -2.47203800 | -1.44940500 | 0.14259800  | C | 6.74311900  | 4.82915800  | -0.00352700 |
| H | -5.13704200 | 1.51737000  | -1.45471900 | H | 5.20082900  | 3.45032300  | 0.29021100  |
| H | -6.71917900 | -2.09220100 | 0.28218500  | H | 7.51965300  | 4.17358000  | 0.37983300  |
| C | -7.44871500 | 0.26804300  | -0.82505500 | H | 7.05880500  | 5.81165400  | -0.34852300 |
| C | -4.30044600 | -3.18720900 | 1.00536800  | C | 0.82313000  | 2.15967200  | 1.80865600  |
| F | -7.54017500 | 1.07868100  | -1.88463900 | C | 0.72513600  | 3.20420000  | 0.68303900  |
| F | -7.85858200 | 0.96907200  | 0.25151900  | H | 0.13847000  | 4.06498100  | 1.02136600  |
| F | -8.33041600 | -0.73149000 | -0.99629600 | C | 2.10446200  | 3.70829000  | 0.21654700  |
| F | -3.47873000 | -3.99637600 | 0.31622400  | H | 2.74464900  | 2.83606100  | 0.04892600  |
| F | -3.68940700 | -2.94443800 | 2.18773400  | C | 0.88701500  | -2.49456200 | 0.70504600  |
| F | -5.41810500 | -3.87480400 | 1.27162900  | C | 2.11554700  | -3.06763800 | 0.37292200  |
| N | -2.53260800 | 0.83419500  | -1.05980400 | C | 2.50009000  | -4.28324500 | 0.93055800  |
| C | -2.41384000 | 2.19172300  | -1.03852400 | C | 1.61458400  | -4.87944900 | 1.82389800  |
| C | -1.29067600 | 2.93756200  | -0.71803600 | C | 0.38289200  | -4.30576400 | 2.16337700  |
| C | -2.06314200 | 4.19800900  | -0.68123300 | C | 0.00825700  | -3.09719800 | 1.60078900  |
| C | -3.28620200 | 3.38238500  | -1.14198600 | H | 3.43259200  | -4.76914900 | 0.67402200  |
| O | -4.44231000 | 3.60627700  | -1.41037800 | H | 1.89251400  | -5.83142000 | 2.26624500  |
| O | -1.84546000 | 5.32554100  | -0.30011500 | H | -0.27590300 | -4.81344100 | 2.85900200  |
| H | -1.67258500 | 0.35373700  | -0.80995500 | H | -0.94045700 | -2.62575800 | 1.83377200  |
| N | -0.03528300 | 2.56752600  | -0.40497200 | C | 0.74329100  | -1.26996300 | -0.04662400 |
| H | 0.11285800  | 1.56553400  | -0.47465600 | N | 2.80150600  | -2.24023300 | -0.53874900 |
| C | -2.69207500 | 0.20228100  | 3.16366200  | C | 1.92586000  | -1.15660400 | -1.02543100 |
| C | -1.45180100 | -0.29267000 | 3.47455700  | S | 4.24539300  | -2.69202000 | -1.24552200 |
| C | -0.26865200 | 0.38005400  | 3.08839900  | C | 5.34378200  | -2.78483500 | 0.15150700  |
| C | -0.37627100 | 1.60585200  | 2.37105500  | C | 6.23540500  | -3.85277100 | 0.20485400  |
| C | -1.65823500 | 2.15040600  | 2.16162500  | C | 7.11887400  | -3.93193200 | 1.27621700  |
| C | -2.79680000 | 1.45063100  | 2.50121000  | C | 7.09800400  | -2.95806000 | 2.27115500  |
| H | -3.57744600 | -0.35930000 | 3.43554400  | C | 6.19809500  | -1.89642900 | 2.20093600  |
| H | -1.34182000 | -1.22861500 | 4.01286800  | C | 5.31137500  | -1.79870000 | 1.13537400  |
| C | 2.00445600  | 1.54746500  | 2.15164600  | H | 6.22337600  | -4.60973200 | -0.57186200 |
| C | 2.00307700  | 0.38447100  | 2.96026500  | H | 7.81954000  | -4.75836600 | 1.33451400  |
| H | 2.95874400  | 1.88144800  | 1.76347800  | H | 7.78519100  | -3.02786700 | 3.10858900  |
| H | 2.95254100  | -0.08552200 | 3.21385000  | H | 6.18355000  | -1.14153700 | 2.98041900  |
| N | 0.92115900  | -0.21342500 | 3.38730400  | C | 1.38950000  | -1.44766500 | -2.47849600 |
| O | -3.96844200 | 2.02330800  | 2.14683800  | H | 2.25781000  | -1.76122300 | -3.06569600 |
| C | -5.17348200 | 1.34338100  | 2.43966400  | C | 0.33295100  | -2.52864400 | -2.54234000 |
| H | -5.96594400 | 1.92266200  | 1.96780400  | C | -1.03390200 | -2.24362000 | -2.49499900 |

C 0.74559900 -3.86378400 -2.56615600  
 C -1.96771000 -3.27291900 -2.44238400  
 C -0.18924900 -4.89155800 -2.50326900  
 H 1.80471600 -4.10204100 -2.61709800  
 C -1.54796400 -4.59926000 -2.43353400  
 H -3.02543400 -3.03374100 -2.39849000  
 H 0.14832100 -5.92346500 -2.50988200  
 H -2.27835200 -5.40043100 -2.37772000  
 O -0.15459500 -0.44526600 0.02922700  
 H -1.37512200 -1.21263500 -2.49948900  
 O 4.60662100 -1.57623000 -2.11945300  
 H 4.60713500 -0.97568800 1.06076500  
 O 4.14464800 -4.02509800 -1.81488000  
 C 2.50399100 0.31021600 -0.98929800  
 O 3.79997300 0.46327400 -0.48482600  
 H 1.88144000 0.84378600 -0.27754400  
 C 2.31898300 0.95220000 -2.37214800  
 H 2.14031500 2.02817700 -2.28347300  
 H 3.20249400 0.77132500 -2.99354600  
 S 0.86168600 0.17669800 -3.11691800  
 H 4.41100800 0.06177900 -1.12561900

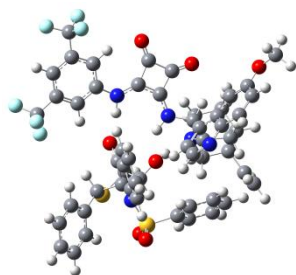

**Int15**

-2709485.27 kcal/mol

C -4.66034600 -1.53897100 -0.91703000  
 C -5.23295600 -1.67710400 -2.33632200  
 C -2.94989100 -1.52336300 -3.34801400  
 H -4.60895600 -2.52580300 -0.44567600  
 H -6.17954900 -2.22511000 -2.30926900  
 H -2.03036400 -2.08663200 -3.18041400  
 H -2.88321100 -1.08755200 -4.34987800  
 H -5.31482100 -0.93184300 -0.28380200  
 N -3.00357600 -0.40118300 -2.39257200  
 C -4.10956900 0.49428200 -2.76791900  
 H -3.83432000 1.01710600 -3.69018700  
 H -4.20160200 1.24872200 -1.97934800  
 C -5.44955200 -0.27773500 -2.95565800  
 H -5.63742600 -0.40954700 -4.02883000

C 5.85417600 -0.70634200 -0.33191400  
 C 4.48946000 -0.66644000 -0.55804200  
 C 3.77895300 -1.85206300 -0.79050200  
 C 4.45685100 -3.07034300 -0.80488400  
 C 5.83164800 -3.08216200 -0.57890500  
 C 6.54452800 -1.91594100 -0.33804000  
 H 3.96615100 0.28344900 -0.56703900  
 H 3.92451600 -3.99808300 -0.99984200  
 H 7.61378200 -1.94460200 -0.16800100  
 C 6.53449300 -4.41614000 -0.55188100  
 C 6.59537300 0.56472300 -0.01415100  
 F 6.13346900 -5.20657400 -1.55714800  
 F 6.28216300 -5.07229600 0.59358300  
 F 7.86809200 -4.28304300 -0.64777900  
 F 7.78151100 0.61681500 -0.63910000  
 F 5.90075000 1.65988300 -0.36995200  
 F 6.84196000 0.66702800 1.30455800  
 N 2.39971800 -1.72361800 -0.97948800  
 C 1.45133300 -2.68078900 -1.11677200  
 C 0.06446400 -2.55651100 -1.11325000  
 C -0.13655800 -3.99977900 -1.34891600  
 C 1.38400800 -4.15827200 -1.29355200  
 O 2.16856700 -5.07444400 -1.36454500  
 O -1.10124300 -4.70887300 -1.53671100  
 H 2.07307500 -0.75757200 -0.99100800  
 N -0.81844800 -1.55123700 -0.99667100  
 H -0.49906300 -0.59348000 -0.88412400  
 C -3.66912300 -5.19254000 3.29411500  
 C -3.22865300 -4.04458300 3.89874900  
 C -2.72693100 -2.95909000 3.14271600  
 C -2.69266300 -3.06835000 1.71949800  
 C -3.13350200 -4.26876800 1.11594500  
 C -3.61404800 -5.30897400 1.88222000  
 H -4.04569900 -6.00623600 3.90300000  
 H -3.24787900 -3.93565400 4.97803300  
 C -1.76854900 -0.85116500 1.71143500  
 C -1.82107500 -0.86469500 3.12180400  
 H -1.39514200 0.03383200 1.20300400  
 H -1.45977000 -0.00097700 3.67807200  
 N -2.29432300 -1.86250000 3.82658900  
 O -4.01562700 -6.41145800 1.20600400  
 C -4.42572900 -7.54532600 1.93825200  
 H -4.65076100 -8.31200900 1.19639400  
 H -5.32781200 -7.34220300 2.52968500





|   |             |             |             |   |             |             |             |
|---|-------------|-------------|-------------|---|-------------|-------------|-------------|
| H | -3.77018600 | 6.64761000  | 0.90896900  | H | 6.06755100  | 0.88361200  | -3.08807600 |
| C | 4.47126500  | -2.50594900 | -0.22721500 | H | 5.72157100  | -0.11611300 | -1.64165900 |
| C | 3.48090900  | -1.61207400 | 0.15519500  | H | 2.57223800  | 2.95288500  | -1.42026100 |
| C | 3.80439200  | -0.48991600 | 0.91869400  | C | -1.16880300 | 6.79632000  | 0.17187200  |
| C | 5.13269600  | -0.26124200 | 1.28707800  | H | -0.41262600 | 7.16388900  | -0.53086500 |
| C | 6.10671700  | -1.17051600 | 0.89268400  | H | -1.53945400 | 7.66529200  | 0.72817000  |
| C | 5.79503500  | -2.30141900 | 0.14021600  | C | -4.60039200 | 5.06635000  | -0.23197900 |
| H | 2.45439900  | -1.75803800 | -0.16716000 | C | -5.80506500 | 5.61360400  | -0.36807900 |
| H | 5.39933100  | 0.62917200  | 1.84936700  | H | -4.43700600 | 4.05097100  | -0.59958100 |
| H | 6.56823600  | -3.00022000 | -0.15390400 | H | -6.62413400 | 5.08333300  | -0.84526000 |
| C | 7.55076200  | -0.88240900 | 1.21178700  | H | -6.01794500 | 6.61657900  | -0.00378200 |
| C | 4.07250600  | -3.65565000 | -1.11002700 | C | -0.10050500 | 2.24553700  | -1.75933000 |
| F | 7.68887800  | -0.17027900 | 2.33512500  | C | 0.00655300  | 3.22483900  | -0.57856100 |
| F | 8.13166600  | -0.17929200 | 0.21841100  | H | 0.72128900  | 4.02000700  | -0.81523200 |
| F | 8.26243600  | -2.01346600 | 1.35336800  | C | -1.34160200 | 3.87526600  | -0.21942400 |
| F | 2.98269700  | -4.28868200 | -0.63979800 | H | -2.09361300 | 3.08331400  | -0.14706900 |
| F | 3.75232600  | -3.22839700 | -2.35228500 | C | -1.00086700 | -2.40199000 | -0.95483900 |
| F | 5.04589900  | -4.56464300 | -1.24381600 | C | -2.30682400 | -2.81633700 | -0.67911200 |
| N | 2.75425800  | 0.36443700  | 1.27319800  | C | -2.82723900 | -3.95378000 | -1.29268000 |
| C | 2.82377300  | 1.72520100  | 1.31678900  | C | -2.00465400 | -4.62097600 | -2.19501900 |
| C | 1.84278900  | 2.63552100  | 0.96246000  | C | -0.70144500 | -4.19711000 | -2.48853100 |
| C | 2.77871700  | 3.77646700  | 1.05369500  | C | -0.18546800 | -3.07514400 | -1.86286700 |
| C | 3.84355500  | 2.77385900  | 1.54244400  | H | -3.82016500 | -4.32297400 | -1.07105700 |
| O | 4.99813600  | 2.81737200  | 1.89334400  | H | -2.39136400 | -5.51057800 | -2.68313400 |
| O | 2.74260200  | 4.94135200  | 0.72922200  | H | -0.09954500 | -4.75402500 | -3.19785700 |
| H | 1.84729700  | 0.01705800  | 0.97478200  | H | 0.82041700  | -2.71953100 | -2.05919200 |
| N | 0.57631800  | 2.45634500  | 0.54123900  | C | -0.72206200 | -1.23708100 | -0.14702800 |
| H | 0.29712800  | 1.48082200  | 0.54283700  | N | -2.91372200 | -1.93763900 | 0.23636600  |
| C | 3.31565800  | 0.02996200  | -2.96111600 | C | -1.92241200 | -1.00340000 | 0.79298200  |
| C | 2.06211100  | -0.33594700 | -3.37915300 | S | -4.54038200 | -2.06534600 | 0.62499700  |
| C | 0.91910000  | 0.42728200  | -3.04447800 | C | -5.32934100 | -1.88561200 | -0.96745200 |
| C | 1.08265000  | 1.60361600  | -2.25793000 | C | -6.41294900 | -2.71663900 | -1.23928000 |
| C | 2.38856400  | 2.01602200  | -1.92987200 | C | -7.06694900 | -2.58900700 | -2.46024500 |
| C | 3.48239800  | 1.23173400  | -2.22990400 | C | -6.63235000 | -1.64857300 | -3.39022400 |
| H | 4.16485400  | -0.59880200 | -3.19863400 | C | -5.54444400 | -0.82685300 | -3.10349800 |
| H | 1.91096000  | -1.23399700 | -3.96944500 | C | -4.88401300 | -0.93750000 | -1.88570600 |
| C | -1.30338900 | 1.76822400  | -2.22050200 | H | -6.72504500 | -3.45635600 | -0.51026200 |
| C | -1.34521400 | 0.64826700  | -3.08698300 | H | -7.91275400 | -3.23034600 | -2.68557000 |
| H | -2.24945900 | 2.17691100  | -1.88818800 | H | -7.14138200 | -1.55720500 | -4.34466000 |
| H | -2.31050900 | 0.28458600  | -3.43797700 | H | -5.20542600 | -0.09678000 | -3.83161000 |
| N | -0.29381500 | -0.03336100 | -3.46180300 | C | -1.35436200 | -1.44641200 | 2.21439500  |
| O | 4.67091300  | 1.67764000  | -1.76800600 | H | -0.38969300 | -1.93584000 | 2.05163200  |
| C | 5.83021600  | 0.90722000  | -2.01715900 | C | -2.21423900 | -2.43622200 | 2.96913400  |
| H | 6.63574900  | 1.39673000  | -1.47169600 | C | -3.18173900 | -2.05812400 | 3.89796500  |

C -2.01851200 -3.79516600 2.70997900  
 C -3.94941900 -3.02108700 4.54346200  
 C -2.78464200 -4.75865400 3.35399700  
 H -1.25938900 -4.10155000 1.99305700  
 C -3.75525400 -4.37171100 4.27222200  
 H -4.70182100 -2.71233400 5.26253700  
 H -2.62120400 -5.81034300 3.13990200  
 H -4.35635900 -5.12079100 4.77853900  
 O 0.30092600 -0.57002000 -0.10591300  
 H -3.33268700 -1.00854100 4.12615300  
 O -4.83024800 -0.91078900 1.47337400  
 H -4.04162200 -0.29745400 -1.64519300  
 O -4.85132700 -3.39824900 1.09877100  
 C -2.28100300 0.53183900 0.81801100  
 O -3.41711000 0.92829100 0.10763300  
 H -1.46042600 1.00541000 0.28768100  
 C -2.25387100 1.04184700 2.25772500  
 H -1.98620300 2.10251800 2.27791400  
 H -3.22183600 0.88843800 2.74506000  
 S -0.93690500 0.11129800 3.07558400  
 H -4.19292700 0.61523100 0.60440700

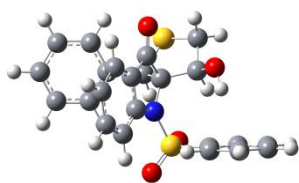

**3a**

-1279534.77 kcal/mol

C -0.82506000 1.32141400 -1.42003600  
 C -0.12689800 1.58326800 -0.24274200  
 C 0.10071900 2.90204900 0.15402800  
 C -0.37620800 3.91467800 -0.67431000  
 C -1.07309000 3.65274300 -1.85843100  
 C -1.30743400 2.33892100 -2.23450800  
 H 0.60847500 3.13603800 1.07930200  
 H -0.20742200 4.94510700 -0.37521900  
 H -1.43456800 4.47386400 -2.46822900  
 H -1.85330900 2.08250700 -3.13674800  
 C -0.96593800 -0.12167600 -1.59343500  
 N 0.22752100 0.36572400 0.38671300  
 C -0.31754900 -0.80049900 -0.36022700  
 S 1.35632000 0.24106100 1.61175600  
 C 2.92831300 0.15031900 0.76897200  
 C 3.69061900 -1.00899300 0.88233100

C 4.90032900 -1.09040900 0.19742400  
 C 5.33240700 -0.02391600 -0.58550100  
 C 4.56430900 1.13623000 -0.68152100  
 C 3.35814700 1.23407100 0.00175500  
 H 3.33339800 -1.82908800 1.49577600  
 H 5.50156500 -1.99019300 0.27539900  
 H 6.27229900 -0.09431500 -1.12363700  
 H 4.90557100 1.96775400 -1.28923100  
 C -1.36256900 -1.56458100 0.49787400  
 H -0.89014700 -1.73659500 1.46561600  
 C -2.64060500 -0.78808000 0.72489000  
 C -3.71210200 -0.80739700 -0.17037900  
 C -2.71044600 0.03915600 1.84917100  
 C -4.82589100 -0.00445900 0.05297100  
 C -3.82197000 0.84581200 2.06849500  
 H -1.88442500 0.05246600 2.55593700  
 C -4.88356300 0.82594600 1.16892800  
 H -5.65331700 -0.02951700 -0.65004700  
 H -3.85916500 1.48514000 2.94546800  
 H -5.75514600 1.45111700 1.33948200  
 O -1.50342300 -0.70330900 -2.50836800  
 H -3.66613900 -1.44878000 -1.04438100  
 O 1.13538800 -1.03693300 2.26346800  
 H 2.75781500 2.13539700 -0.06631000  
 O 1.31679600 1.48071900 2.36160500  
 C 0.72222700 -1.84954100 -0.81978100  
 O 1.58974300 -1.37260300 -1.81789900  
 H 1.27661200 -2.18968800 0.06333000  
 C -0.08155000 -3.02292100 -1.37271500  
 H -0.38730300 -2.80299500 -2.39629000  
 H 0.50992400 -3.93988900 -1.35094100  
 S -1.55490500 -3.20743500 -0.30816600  
 H 2.30476400 -0.88220700 -1.39367000

## 15. References

1. (a) J. P. Malerich, K. Hagihara and V. H. Rawal, Chiral Squaramide Derivatives are Excellent Hydrogen Bond Donor Catalysts, *J. Am. Chem. Soc.*, 2008, **130**, 14416–14417; (b) S. Del Pozo, S. Vera, M. Oiarbide and C. Palomo, Catalytic Asymmetric Synthesis of Quaternary Barbituric Acids, *J. Am. Chem. Soc.*, 2017, **139**, 15308–15311.
2. X.-H. Fei, Y.-L. Zhao, F.-F. Yang, X. Guan, Z.-Q. Li, D.-P. Wang, M. Zhou, Y.-Y. Yang and B. He, Construction of Oxepino[3,2-b]indoles via [4+3] Annulation of 2-Ylideneoxindoles with Crotonate-Derived Sulfur Ylides, *Adv. Synth. Catal.*, 2021, **363**, 3018–3024.
3. C. Guo, M. Schedler, C. G. Daniliuc and F. Glorius, N-Heterocyclic Carbene Catalyzed Formal [3+2] Annulation Reaction of Enals: An Efficient Enantioselective Access to Spiro-Heterocycles, *Angew. Chem., Int. Ed.*, 2014, **53**, 10232–10236.
4. L.-J. Zhang, Y. Wang, X.-Q. Hu and P.-F. Xu, Hydrogen-Bonding Network Promoted [3+2] Cycloaddition: Asymmetric Catalytic Construction of Spiro-pseudoindoxyl Derivatives, *Chem. Asian J.*, 2016, **11**, 834–838.
5. L. Yang, W. Huang, X.-H. He, M.-C. Yang, X. Li, G. He, C. Peng and B. Han, Stereoselective Synthesis of Hydropyrano[3,2-b]indoles via Organocatalytic Asymmetric Inverse-Electron-Demand Oxa-Diels–Alder Reaction, *Adv. Synth. Catal.*, 2016, **358**, 2970–2975.
6. M. Kondo, N. Matsuyama, T. Z. Aye, I. Mattan, T. Sato, Y. Makita, M. Ishibashi, M. A. Arai, S. Takizawa and H. Sasai, Practical Stereoselective Synthesis of C3-Spirooxindole- and C2-Spiropseudoindoxyl-Pyrrolidines via Organocatalyzed Pictet-Spengler Reaction/Oxidative Rearrangement Sequence, *Adv. Synth. Catal.*, 2021, **363**, 2648–2663.
7. E. Brambilla, C. Pozza, S. Rizzato, G. Abbiati and V. Pirovano, Phosphine-Catalyzed [3+2] Cycloaddition of Aza-Aurones and Allenates: Enantioselective Synthesis of 2-Spirocyclopentyl-Indolin-3-Ones, *Eur. J. Org. Chem.*, 2023, **26**, e202201385.
8. J.-X. Zhu, F. Pi, T. Sun, W.-Y. Huang, L. Gao, Z.-C. Chen, W. Du and Y.-C. Chen, Asymmetric 2,4-Dienylation/[4+2] Annulation Cascade to Construct Fused Frameworks via Auto-Tandem Palladium Catalysis, *Org. Lett.*, 2023, **25**, 3682–3686.
9. Q. Ren, M. Lang, H. Liu, X. Li, D. Wu, J. Wu, M. Yang, J. Wei, Z. Ren, L. Wang, Stereocontrol of C–N Axial and Spiro-Central Chirality via Rh(II)-Catalyzed Enantioselective N–H Bond Insertion of Indolinone-Spiroacetal, *Org. Lett.*, 2023, **25**, 7745–7750.
10. Q. Yin and S. L. You, Enantioselective Chlorocyclization of Indole Derived Benzamides for the Synthesis of Spiro-indolines, *Org. Lett.*, 2013, **15**, 4266–4269.
11. Y. Zhu, W. He, W. Wang, C. E. Pitsch, X. Wang and X. Wang, Enantioselective Tandem Cyclization of Alkyne-Tethered Indoles Using Cooperative Silver(I)/Chiral Phosphoric Acid Catalysis, *Angew. Chem. Int. Ed.*, 2017, **129**, 12374–12377.
12. J. Luo, Y.-B. Fang, X.-Y. Mao, M. Yang, Y.-L. Zhao, Y.-L. Liu, G.-S. Chen, Y.-F. Ji, Organocatalytic Asymmetric Cyclization Reaction of 2-Alkynyl-3,3-Difluoro-3*H*-Indoles and 2-Mercaptoimidazoles: Access to *gem*-Difluorinated C2-Spiro Indolines, *Adv. Synth. Catal.*, 2019, **361**, 1408–1413.

13. P. Sah, A. K. Gond, G. Saini and M. A. Kapur, Sequential Transition Metal and Organocatalytic Approach to the Enantioselective Synthesis of C2-Spiroindoline Systems, *Org. Lett.*, 2023, **25**, 9170–9175.
14. (a) J. Guo and M. W. Wong, Cinchona Alkaloid-Squaramide Catalyzed Sulfa-Michael Addition Reaction: Mode of Bifunctional Activation and Origin of Stereinduction, *J. Org. Chem.*, 2017, **82**, 4362–4368; (b) M. N. Grayson, Mechanism and Origins of Stereoselectivity in the Cinchona Thiourea- and Squaramide-Catalyzed Asymmetric Michael Addition of Nitroalkanes to Enones, *J. Org. Chem.*, 2017, **82**, 4396–4401; (c) C. Trujillo, I. Rozas, A. Botte and S. J. Connon, A DFT mechanistic study of the organocatalytic asymmetric reaction of aldehydes and homophthalic anhydride, *Chem. Commun.*, 2017, **53**, 8874–8877; (d) P. Wang, Y. Gao, Y. Zhao, W. Liu and Y. Wang, Unveiling Mechanism of a Quinine-Squaramide Catalyzed Enantioselective Aza-Friedel–Crafts Reaction between Cyclic Trifluoromethyl Ketimine and Naphthol: A DFT Study, *J. Org. Chem.*, 2017, **82**, 13109–13114; (e) S. Ričko, J. A. Izzo and K. A. Jørgensen, Insights on the Pseudo-Enantiomeric Properties of Bifunctional Cinchona Alkaloid Squaramide-derived Organocatalyst, *Chem. Eur. J.*, 2020, **26**, 15727–15732; (f) A. Biswas, A. Ghosh, R. Shankhdhar and I. Chatterjee, Squaramide Catalyzed Asymmetric Synthesis of Five- and Six-Membered Rings, *Asian J. Org. Chem.*, 2021, **10**, 1345–1376.
15. (a) G. Tanriver, B. Dedeoglu, S. Catak and V. Aviyente, Computational Studies on Cinchona Alkaloid-Catalyzed Asymmetric Organic Reactions, *Acc. Chem. Res.*, 2016, **49**, 1250–1262; (b) S. Grimme, Do Special Noncovalent  $\pi$ - $\pi$  Stacking Interactions Really Exist? *Angew. Chem., Int. Ed.*, 2008, **47**, 3430–3434; (c) J. E. Antoline, E. H. Krenske, A. G. Lohse, K. N. Houk and R. P. Hsung, Stereoselectivities and Regioselectivities of (4+3) Cycloadditions Between Allenamide-Derived Chiral Oxazolidinone-Stabilized Oxyallyls and Furans: Experiment and Theory, *J. Am. Chem. Soc.*, 2011, **133**, 14443–14451; (d) X. Xu, B. Pooi, H. Hirao and S. H. Hong, CH- $\pi$  and CF- $\pi$  Interactions Lead to Structural Changes of N-Heterocyclic Carbene Palladium Complexes, *Angew. Chem. Int. Ed.*, 2014, **53**, 1283–1287; (e) J. Li and R. Q. Zhang, Strong orbital interaction in a weak CH- $\pi$  hydrogen bonding system, *Sci. Rep.*, 2016, **6**, 22304; (f) O. Manuel, C. J. AS and T. F. Dean, Parametrization of Non-covalent Interactions for Transition State Interrogation Applied to Asymmetric Catalysis, *J. Am. Chem. Soc.*, 2017, **139**, 6803–6806; (g) J. Wang, X. Gu, P. Zhang, X. Huang, X. Zheng, M. Chen, H. Feng, R. T. K. Kwok, J. W. Y. Lam and B. Z. Tang, Ionization and Anion- $\pi^+$  Interaction: A New Strategy for Structural Design of Aggregation-Induced Emission Luminogens, *J. Am. Chem. Soc.*, 2017, **139**, 16974–16979; (h) C. Liu, M. Wang, S. Liu, Y. Wang, Y. Peng, Y. Lan and Q. Liu, Manganese-Catalyzed Asymmetric Hydrogenation of Quinolines Enabled by  $\pi$ - $\pi$  Interaction, *Angew. Chem. Int. Ed.*, 2021, **60**, 5108–5113; (i) R. Maji, S. C. Mallojjala and S. E. Wheeler, Electrostatic Interactions in Asymmetric Organocatalysis, *Acc. Chem. Res.*, 2023, **56**, 1990–2000.
16. T. Wei, M.-S. Xie and H.-M. Guo, Construction of thioglycoside bonds via an asymmetric organocatalyzed sulfa-Michael/aldol reaction: access to 4<sup>1</sup>-thionucleosides. *Chem. Commun.*, 2024, **60**, 5018–5021.
